# Supplementary material for: Analogous mechanism regulating formation of neocortical basal radial glia and cerebellar Bergmann glia
Source: eLife. 2017 May 10;6:e23253. doi: 10.7554/eLife.23253 (PMC5457141; doi:10.7554/eLife.23253)
Supplement: Supplementary file 1. — (A) Summary of consensus markers (first spreadsheet) based on two single-cell RNA-seq datasets (Pollen et al., 2015; Thomsen et al., 2016). (B) Table listing putative BG-specific expression of the orthologs of human bRG markers (second spreadsheet). Column A and B: human and mouse gene symbol, respectively; column C: bRG markers identified by SINCERA and/or Pollen et al; column D: scores of BG specific expression; column E and F: BG-specific genes identified by differential expression analysis and WGCNA, respectively; column G: BG-specific genes identified by RNA-seq and inspection of Allen Brain Atlas. (C) BG-specific genes identified by intersecting of DE genes (third spreadsheet). Column A and B: gene symbol of mouse and human genes; column C: entrez gene ID; column D: ensembl gene ID; column D: description of gene name; column F-H: log2 fold changes. (D) BG-specific genes identified by WGCNA (fourth spreadsheet). Column A and B: gene symbol of mouse and human genes; column C: description of gene name; column D: initial assignment of co-expression module; column E: module membership value in the BG (red) module; column K and L: bRG-specific genes identified by Pollen et al and SINCERA (see Figure 1A); column M: BG-specific genes identified by differential gene expression analysis; column N: specific expression in BG of mouse cerebella at postnatal day 56 according Allen Brain Atlas. Scoring criteria: 0, no expression; 1, expressed in Purkinje cells; 2, expression in Purkinje cell layer but not sure in which cell type; 3, expressed in Bergmann glia. DOI: http://dx.doi.org/10.7554/eLife.23253.024 [file elife-23253-supp1.xlsx]

## Sheet: aRG_bRG
hSymbol	mSymbol	markers
ANXA1	Anxa1	aRG
CLU	Clu	aRG
CRYAB	Cryab	aRG
CYR61	Cyr61	aRG
EGR1	Egr1	aRG
FBXO32	Fbxo32	aRG
FOS	Fos	aRG
KIF9	Kif9	aRG
MAP3K7	Map3k7	aRG
PCDH9	Pcdh9	aRG
SCHIP1	Schip1	aRG
SPARC	Sparc	aRG
TAGLN2	Tagln2	aRG
TPT1	Tpt1	aRG
TTC3	Ttc3	aRG
ACSBG1	Acsbg1	bRG
ADD1	Add1	bRG
APBB2	Apbb2	bRG
ATP1A2	Atp1a2	bRG
ATP1B2	Atp1b2	bRG
C1orf61		bRG
CARHSP1	Carhsp1	bRG
CD82	Cd82	bRG
CST3	Cst3	bRG
CYP51A1	Cyp51	bRG
DBI	Dbi	bRG
DDR1	Ddr1	bRG
EFNB1	Efnb1	bRG
ETV5	Etv5	bRG
F3	F3	bRG
FABP5	Fabp5	bRG
FABP7	Fabp7	bRG
FAM107A	Fam107a	bRG
FUT8	Fut8	bRG
GABRB1	Gabrb1	bRG
GAPVD1	Gapvd1	bRG
GPM6B	Gpm6b	bRG
GPX3	Gpx3	bRG
HMGCS1	Hmgcs1	bRG
HNMT	Hnmt	bRG
HOPX	Hopx	bRG
IDH1	Idh1	bRG
IFI27L2		bRG
ITGB5	Itgb5	bRG
LIFR	Lifr	bRG
LPAR1	Lpar1	bRG
LPIN2	Lpin2	bRG
LRRTM3	Lrrtm3	bRG
LSS	Lss	bRG
MGLL	Mgll	bRG
MGST3	Mgst3	bRG
MOXD1	Moxd1	bRG
MT3	Mt3	bRG
NKAIN4	Nkain4	bRG
NOG	Nog	bRG
NRG1	Nrg1	bRG
OLFM2	Olfm2	bRG
PAG1	Pag1	bRG
PAQR8	Paqr8	bRG
PEA15	Pea15a	bRG
PTN	Ptn	bRG
PTPRZ1	Ptprz1	bRG
RAB3GAP2	Rab3gap2	bRG
RHOJ	Rhoj	bRG
ROBO1	Robo1	bRG
RTN1	Rtn1	bRG
SAT1	Sat1	bRG
SCD	Scd1	bRG
SEPW1	Sepw1	bRG
SLC15A2	Slc15a2	bRG
SLC1A2	Slc1a2	bRG
SLC1A3	Slc1a3	bRG
SLC9A3R1	Slc9a3r1	bRG
SLCO1C1	Slco1c1	bRG
SLITRK2	Slitrk2	bRG
STOM	Stom	bRG
TLN2	Tln2	bRG
TNC	Tnc	bRG
TTYH1	Ttyh1	bRG
TUBB2A	Tubb2a	bRG
TUBB2B	Tubb2b	bRG
UGP2	Ugp2	bRG
WDFY3	Wdfy3	bRG

## Sheet: Expression in cerebellar BG
hSymbol	mSymbol	markers	Score*	BG1	BG2	BG genes
ACSBG1	Acsbg1	SINCERA+Pollen	3	yes	yes	yes
APBB2	Apbb2	SINCERA+Pollen	1	0	0	no
CARHSP1	Carhsp1	SINCERA+Pollen	3	0	0	yes
ETV5	Etv5	SINCERA+Pollen	3	yes	yes	yes
FABP7	Fabp7	SINCERA+Pollen	3	yes	yes	yes
FAM107A	Fam107a	SINCERA+Pollen	3	0	0	yes
FUT8	Fut8	SINCERA+Pollen	2	0	0	no
GABRB1	Gabrb1	SINCERA+Pollen	3	yes	yes	yes
HNMT	Hnmt	SINCERA+Pollen	3	0	0	yes
HOPX	Hopx	SINCERA+Pollen	3	0	yes	yes
LIFR	Lifr	SINCERA+Pollen	3	0	yes	yes
LRRTM3	Lrrtm3	SINCERA+Pollen	0	0	0	no
MGST3	Mgst3	SINCERA+Pollen	1	0	0	no
MOXD1	Moxd1	SINCERA+Pollen	2	0	0	no
MT3	Mt3	SINCERA+Pollen	3	yes	yes	yes
NOG	Nog	SINCERA+Pollen	1	0	0	no
NRG1	Nrg1	SINCERA+Pollen	0	0	0	no
PAQR8	Paqr8	SINCERA+Pollen	3	yes	yes	yes
PTPRZ1	Ptprz1	SINCERA+Pollen	3	yes	yes	yes
RAB3GAP2	Rab3gap2	SINCERA+Pollen	3	0	0	yes
RHOJ	Rhoj	SINCERA+Pollen	3	0	0	yes
SAT1	Sat1	SINCERA+Pollen	3	0	0	yes
SLCO1C1	Slco1c1	SINCERA+Pollen	2	0	0	no
SLITRK2	Slitrk2	SINCERA+Pollen	2	0	yes	yes
STOM	Stom	SINCERA+Pollen	3	0	0	yes
TNC	Tnc	SINCERA+Pollen	3	yes	yes	yes
TTYH1	Ttyh1	SINCERA+Pollen	1	0	0	no
ADD1	Add1	SINCERA	3	0	0	yes
ATP1A2	Atp1a2	SINCERA	3	yes	yes	yes
ATP1B2	Atp1b2	SINCERA	3	0	yes	yes
C1orf61		SINCERA		0	0	no
CD82	Cd82	SINCERA	1	0	0	no
CST3	Cst3	SINCERA	3	0	0	yes
CYP51A1	Cyp51	SINCERA	3	0	0	yes
DBI	Dbi	SINCERA	3	0	yes	yes
DDR1	Ddr1	SINCERA	3	0	0	yes
EFNB1	Efnb1	SINCERA	0	0	0	no
F3	F3	SINCERA	2	0	0	no
FABP5	Fabp5	SINCERA	2	0	0	no
GAPVD1	Gapvd1	SINCERA	2	0	0	no
GPM6B	Gpm6b	SINCERA	3	0	0	yes
GPX3	Gpx3	SINCERA	2	0	0	no
HMGCS1	Hmgcs1	SINCERA	3	0	0	yes
IDH1	Idh1	SINCERA	3	0	0	yes
IFI27L2		SINCERA		0	0	no
ITGB5	Itgb5	SINCERA	0	0	0	no
LPAR1	Lpar1	SINCERA	2	0	0	no
LPIN2	Lpin2	SINCERA	3	0	0	yes
LSS	Lss	SINCERA	1	0	0	no
MGLL	Mgll	SINCERA	0	0	0	no
NKAIN4	Nkain4	SINCERA	3	0	0	yes
OLFM2	Olfm2	SINCERA	2	0	0	no
PAG1	Pag1	SINCERA	2	0	0	no
PEA15	Pea15a	SINCERA	1	0	yes	yes
PTN	Ptn	SINCERA	3	yes	yes	yes
ROBO1	Robo1	SINCERA	0	0	0	no
RTN1	Rtn1	SINCERA	1	0	0	no
SCD	Scd1	SINCERA	0	0	0	no
SEPW1	Sepw1	SINCERA	1	0	0	no
SLC15A2	Slc15a2	SINCERA	0	0	0	no
SLC1A2	Slc1a2	SINCERA	3	0	0	yes
SLC1A3	Slc1a3	SINCERA	3	0	yes	yes
SLC9A3R1	Slc9a3r1	SINCERA	2	yes	yes	yes
TLN2	Tln2	SINCERA	2	0	0	no
TUBB2A	Tubb2a	SINCERA	3	0	0	yes
TUBB2B	Tubb2b	SINCERA	3	0	0	yes
UGP2	Ugp2	SINCERA	1	0	yes	yes
WDFY3	Wdfy3	SINCERA	0	0	0	no
ABAT	Abat	Pollen et al		0	yes	yes
ARAP2	Arap2	Pollen et al		0	0	no
BMP7	Bmp7	Pollen et al		0	0	no
BRCA1	Brca1	Pollen et al		0	0	no
CDCA7L	Cdca7l	Pollen et al		0	0	no
CDK6	Cdk6	Pollen et al		yes	yes	yes
DIO2	Dio2	Pollen et al		0	0	no
DOCK1	Dock1	Pollen et al		0	0	no
EDNRB	Ednrb	Pollen et al		0	0	no
EEPD1	Eepd1	Pollen et al		0	0	no
ETV1	Etv1	Pollen et al		0	0	no
FBN2	Fbn2	Pollen et al		0	0	no
FGFBP3	Fgfbp3	Pollen et al		0	0	no
FHOD3	Fhod3	Pollen et al		0	0	no
FKBP9	Fkbp9	Pollen et al		0	0	no
GFAP	Gfap	Pollen et al		0	0	no
GNG5	Gng5	Pollen et al		0	0	no
GPR126	Gpr126	Pollen et al		0	0	no
GULP1	Gulp1	Pollen et al		0	0	no
HS6ST2	Hs6st2	Pollen et al		0	0	no
IDI1	Idi1	Pollen et al		0	0	no
IL6ST	Il6st	Pollen et al		0	0	no
ITM2C	Itm2c	Pollen et al		0	0	no
LGALS3	Lgals3	Pollen et al		0	0	no
LGALS3BP	Lgals3bp	Pollen et al		0	0	no
MLC1	Mlc1	Pollen et al		0	0	no
MOB3B	Mob3b	Pollen et al		0	0	no
PMP22	Pmp22	Pollen et al		0	0	no
RGS16	Rgs16	Pollen et al		0	0	no
SEL1L3	Sel1l3	Pollen et al		0	0	no
SEMA5A	Sema5a	Pollen et al		0	0	no
SOAT1	Soat1	Pollen et al		0	0	no
TCF7L2	Tcf7l2	Pollen et al		0	0	no
TFPI	Tfpi	Pollen et al		0	0	no
TKTL1	Tktl1	Pollen et al		0	0	no
TMEM132B	Tmem132b	Pollen et al		0	0	no
VEPH1	Veph1	Pollen et al		0	0	no
LOC100507206		Pollen et al		0	0	no
YBX3	Ybx3	Pollen et al		0	0	no
Note: * scoring criteria: 0, no expression; 1, expressed in Purkinje cells;
2, expression in Purkinje cell layer but not sure in which cell type
3, expressed in Bergmann glia; NA, no ISH data

## Sheet: BG.specificGenes (DE analysis)
Symbol	hSymbol	Entrez	Ensemb.id	description	CKO:CKO.MEK	E14:12	CKO:CTRL	Score*
1110032F04Rik	C3orf80	68725	ENSMUSG00000046999	RIKEN cDNA 1110032F04 gene	-1.10705	1.11315	-1.00734	NA
1700084C01Rik	C1orf110	78465	ENSMUSG00000070532	RIKEN cDNA 1700084C01 gene	-1.10758	1.52317	-1.03565	NA
1700086L19Rik	NA	74284	ENSMUSG00000071265	RIKEN cDNA 1700086L19 gene	-0.547228	0.913451	-0.595751	0
2810459M11Rik	C2orf72	72792	ENSMUSG00000026227	RIKEN cDNA 2810459M11 gene	-0.766097	1.7008	-0.557476	0
5830416P10Rik	NA	381232	ENSMUSG00000097636	RIKEN cDNA 5830416P10 gene	-1.32943	1.46207	-1.01532	0
6530402F18Rik	NA	76220	ENSMUSG00000079499	RIKEN cDNA 6530402F18 gene	-0.52183	0.523334	-0.768871	0
A930017K11Rik	NA	NA	NA	NA	-0.715327	1.57774	-0.573555	NA
Abcb9	ABCB9	56325	ENSMUSG00000029408	ATP-binding cassette, sub-family B (MDR/TAP), member 9	-1.01736	0.875011	-1.36429	2
Acsbg1	ACSBG1	94180	ENSMUSG00000032281	acyl-CoA synthetase bubblegum family member 1	-2.31609	1.23067	-2.6179	3
Aifm3	AIFM3	72168	ENSMUSG00000022763	apoptosis-inducing factor, mitochondrion-associated 3	-0.600838	0.759805	-0.459693	0
Aldh1l1	ALDH1L1	107747	ENSMUSG00000030088	aldehyde dehydrogenase 1 family, member L1	-2.05359	1.8997	-2.3468	3
Arhgap26	ARHGAP26	71302	ENSMUSG00000036452	Rho GTPase activating protein 26	-0.923039	0.751	-0.607843	1
Arhgef4	ARHGEF4	226970	ENSMUSG00000037509	Rho guanine nucleotide exchange factor (GEF) 4	-0.786508	0.652363	-0.845647	0
Ass1	ASS1	11898	ENSMUSG00000076441	argininosuccinate synthetase 1	-1.42052	1.59344	-2.08762	NA
Atp1a2	ATP1A2	98660	ENSMUSG00000007097	ATPase, Na+/K+ transporting, alpha 2 polypeptide	-1.45541	1.23685	-1.79329	3
Brinp3	BRINP3	215378	ENSMUSG00000035131	bone morphogenetic protein/retinoic acid inducible neural specific 3	-0.934271	3.0127	-0.414101	2
Cacng5	CACNG5	140723	ENSMUSG00000040373	calcium channel, voltage-dependent, gamma subunit 5	-0.783734	1.12483	-0.522844	3
Car8	CA8	12319	ENSMUSG00000041261	carbonic anhydrase 8	-0.974593	1.65279	-1.18269	1
Cbs	CBS	12411	ENSMUSG00000024039	cystathionine beta-synthase	-1.39429	1.32389	-1.26517	3
Ccdc37	CCDC37	243538	ENSMUSG00000048794	coiled-coil domain containing 37	-1.05175	1.76656	-1.27283	2
Cd44	CD44	12505	ENSMUSG00000005087	CD44 antigen	-0.988639	0.82563	-0.79438	NA
Cd83	CD83	12522	ENSMUSG00000015396	CD83 antigen	-1.14125	0.818421	-1.237	NA
Cdh7	CDH7	241201	ENSMUSG00000026312	cadherin 7, type 2	-0.522355	1.11519	-0.536496	3
Cdk6	CDK6	12571	ENSMUSG00000040274	cyclin-dependent kinase 6	-1.00829	0.550896	-1.1586	0
Chrm4	CHRM4	12672	ENSMUSG00000040495	cholinergic receptor, muscarinic 4	-1.87967	1.57274	-1.61376	2
Col4a6	COL4A6	94216	ENSMUSG00000031273	collagen, type IV, alpha 6	-1.54019	0.828512	-1.25523	1
Col5a3	COL5A3	53867	ENSMUSG00000004098	collagen, type V, alpha 3	-0.783276	1.73485	-1.16454	0
Cpne2	CPNE2	234577	ENSMUSG00000034361	copine II	-0.92082	0.58448	-0.921071	2
Cpne8	CPNE8	66871	ENSMUSG00000052560	copine VIII	-0.661461	0.919306	-0.967887	2
Dbpht2	NA	386753	ENSMUSG00000029878	DNA binding protein with his-thr domain	-0.687762	1.07687	-0.729011	0
Ddah1	DDAH1	69219	ENSMUSG00000028194	dimethylarginine dimethylaminohydrolase 1	-0.44549	0.977965	-0.551499	3
Dmd	DMD	13405	ENSMUSG00000045103	dystrophin, muscular dystrophy	-0.673111	0.521912	-0.644507	2
Dusp5	DUSP5	240672	ENSMUSG00000034765	dual specificity phosphatase 5	-2.28763	2.18768	-1.27332	0
Ecm2	ECM2	407800	ENSMUSG00000043631	extracellular matrix protein 2, female organ and adipocyte specific	-0.896911	0.739971	-0.500689	0
Efhd1	EFHD1	98363	ENSMUSG00000026255	EF hand domain containing 1	-2.32585	1.53961	-1.93996	0
Etv4	ETV4	18612	ENSMUSG00000017724	ets variant 4	-3.75255	1.49898	-3.17396	0
Etv5	ETV5	104156	ENSMUSG00000013089	ets variant 5	-3.31465	1.26041	-3.53293	3
F730043M19Rik	NA	320046	ENSMUSG00000052125	RIKEN cDNA F730043M19 gene	-0.4964	0.535657	-0.64877	0
Fabp7	FABP7	12140	ENSMUSG00000019874	fatty acid binding protein 7, brain	-2.22126	0.485981	-2.45108	3
Fam181b	FAM181B	58238	ENSMUSG00000051515	family with sequence similarity 181, member B	-1.03497	0.712627	-1.23085	2
Fam81a	FAM81A	76886	ENSMUSG00000032224	family with sequence similarity 81, member A	-0.9164	0.871801	-0.853554	0
Fbxo2	FBXO2	230904	ENSMUSG00000041556	F-box protein 2	-1.12103	1.02761	-0.85093	0
Fgfr1	FGFR1	14182	ENSMUSG00000031565	fibroblast growth factor receptor 1	-0.457296	0.797277	-0.466065	2
Fhod1	FHOD1	234686	ENSMUSG00000014778	formin homology 2 domain containing 1	-0.583209	0.666409	-0.528218	0
Gabra4	GABRA4	14397	ENSMUSG00000029211	gamma-aminobutyric acid (GABA) A receptor, subunit alpha 4	-0.836268	1.58285	-0.985179	0
Gabrb1	GABRB1	14400	ENSMUSG00000029212	gamma-aminobutyric acid (GABA) A receptor, subunit beta 1	-0.616748	1.80263	-1.08902	3
Gas2l3	GAS2L3	237436	ENSMUSG00000074802	growth arrest-specific 2 like 3	-0.759816	0.525105	-1.08965	0
Gdpd2	GDPD2	71584	ENSMUSG00000019359	glycerophosphodiester phosphodiesterase domain containing 2	-0.579703	0.621461	-0.432042	0
Gm29521	NA	NA	NA	NA	-0.622832	1.60339	-1.10096	NA
Gm7694	C1orf226	665574	ENSMUSG00000096603	predicted gene 7694	-0.58759	0.539489	-0.631666	NA
Gpc4	GPC4	14735	ENSMUSG00000031119	glypican 4	-0.974609	0.479216	-1.13472	0
Gper1	GPER1	76854	ENSMUSG00000053647	G protein-coupled estrogen receptor 1	-0.781833	0.631499	-0.698898	0
Grid2	GRID2	14804	ENSMUSG00000071424	glutamate receptor, ionotropic, delta 2	-0.932961	1.46746	-0.818441	1
Grm3	GRM3	108069	ENSMUSG00000003974	glutamate receptor, metabotropic 3	-0.730325	2.19389	-1.23522	0
Gsap	GSAP	212167	ENSMUSG00000039934	gamma-secretase activating protein	-0.540788	1.46827	-0.874113	3
Gstm1	GSTM5	14862	ENSMUSG00000058135	glutathione S-transferase, mu 1	-1.32463	1.51033	-1.08212	2
Gucy1a3	GUCY1A3	60596	ENSMUSG00000033910	guanylate cyclase 1, soluble, alpha 3	-0.869742	0.59914	-0.471711	3
Hs3st1	HS3ST1	15476	ENSMUSG00000051022	heparan sulfate (glucosamine) 3-O-sulfotransferase 1	-0.4778	0.592376	-0.533098	0
Kcnj10	KCNJ10	16513	ENSMUSG00000044708	potassium inwardly-rectifying channel, subfamily J, member 10	-0.70979	1.03802	-1.01478	3
Klf15	KLF15	66277	ENSMUSG00000030087	Kruppel-like factor 15	-1.25103	1.16309	-1.29485	0
Lmcd1	LMCD1	30937	ENSMUSG00000057604	LIM and cysteine-rich domains 1	-1.40942	0.724367	-1.89142	1
Luzp2	LUZP2	233271	ENSMUSG00000063297	leucine zipper protein 2	-0.824839	1.5913	-1.18503	3
Lxn	LXN	17035	ENSMUSG00000047557	latexin	-0.609647	0.669608	-0.707406	3
Mboat1	MBOAT1	218121	ENSMUSG00000038732	membrane bound O-acyltransferase domain containing 1	-2.10483	0.698667	-2.29263	0
Mcc	MCC	328949	ENSMUSG00000071856	mutated in colorectal cancers	-0.741125	1.09322	-0.725516	3
Metrn	METRN	70083	ENSMUSG00000002274	meteorin, glial cell differentiation regulator	-1.21125	0.78448	-2.13858	3
Mt2	MT1X	17750	ENSMUSG00000031762	metallothionein 2	-0.862382	0.935484	-0.88847	NA
Mt3	MT3	17751	ENSMUSG00000031760	metallothionein 3	-1.54383	1.0832	-1.43423	3
Mybpc1	MYBPC1	109272	ENSMUSG00000020061	myosin binding protein C, slow-type	-1.26565	2.12994	-0.623429	3
Ndst4	NDST4	64580	ENSMUSG00000027971	N-deacetylase/N-sulfotransferase (heparin glucosaminyl) 4	-0.71851	1.36595	-0.721708	0
Nedd9	NEDD9	18003	ENSMUSG00000021365	neural precursor cell expressed, developmentally down-regulated gene 9	-0.836477	0.406835	-0.915614	3
Nfatc1	NFATC1	18018	ENSMUSG00000033016	nuclear factor of activated T cells, cytoplasmic, calcineurin dependent 1	-0.63943	0.78847	-0.685559	3
Ntng2	NTNG2	171171	ENSMUSG00000035513	netrin G2	-0.678284	1.06735	-0.878174	0
Nwd1	NWD1	319555	ENSMUSG00000048148	NACHT and WD repeat domain containing 1	-1.85342	1.58113	-2.31129	3
Otof	OTOF	83762	ENSMUSG00000062372	otoferlin	-0.823676	0.887814	-0.922604	0
P4ha3	P4HA3	320452	ENSMUSG00000051048	procollagen-proline, 2-oxoglutarate 4-dioxygenase (proline 4-hydroxylase), alpha polypeptide III	-0.575736	1.00514	-0.524014	0
Paqr8	PAQR8	74229	ENSMUSG00000025931	progestin and adipoQ receptor family member VIII	-1.17668	0.481977	-1.29151	2
Pcdh20	PCDH20	219257	ENSMUSG00000050505	protocadherin 20	-2.20995	1.26606	-1.32423	1
Pde3a	PDE3A	54611	ENSMUSG00000041741	phosphodiesterase 3A, cGMP inhibited	-0.525873	0.548	-0.556264	0
Pdlim3	PDLIM3	53318	ENSMUSG00000031636	PDZ and LIM domain 3	-2.15447	1.58947	-1.77384	0
Phf19	PHF19	74016	ENSMUSG00000026873	PHD finger protein 19	-0.642563	0.709076	-0.736064	0
Pla2g7	PLA2G7	27226	ENSMUSG00000023913	phospholipase A2, group VII (platelet-activating factor acetylhydrolase, plasma)	-0.92036	0.491365	-0.578728	3
Pld1	PLD1	18805	ENSMUSG00000027695	phospholipase D1	-0.577943	0.53935	-0.61491	0
Plekha2	PLEKHA2	83436	ENSMUSG00000031557	pleckstrin homology domain-containing, family A (phosphoinositide binding specific) member 2	-0.684223	1.46019	-0.745735	2
Plekhb1	PLEKHB1	27276	ENSMUSG00000030701	pleckstrin homology domain containing, family B (evectins) member 1	-0.848874	1.03013	-0.899419	2
Ppp1r14c	PPP1R14C	76142	ENSMUSG00000040653	protein phosphatase 1, regulatory (inhibitor) subunit 14c	-0.476774	0.759039	-0.432138	3
Prex1	PREX1	277360	ENSMUSG00000039621	phosphatidylinositol-3,4,5-trisphosphate-dependent Rac exchange factor 1	-0.799472	0.467936	-1.03461	3
Prss23	PRSS23	76453	ENSMUSG00000039405	protease, serine 23	-0.886481	0.67856	-0.790843	0
Ptn	PTN	19242	ENSMUSG00000029838	pleiotrophin	-0.552151	0.418274	-0.504998	3
Ptprz1	PTPRZ1	19283	ENSMUSG00000068748	protein tyrosine phosphatase, receptor type Z, polypeptide 1	-0.766461	0.95819	-1.29482	3
Rasa3	RASA3	19414	ENSMUSG00000031453	RAS p21 protein activator 3	-0.499559	0.788282	-0.637138	0
Rasgef1c	RASGEF1C	74563	ENSMUSG00000020374	RasGEF domain family, member 1C	-0.600947	2.35614	-0.459736	0
Rhbdf1	RHBDF1	13650	ENSMUSG00000020282	rhomboid family 1 (Drosophila)	-0.50477	0.836714	-0.555224	3
S100b	S100B	20203	ENSMUSG00000033208	S100 protein, beta polypeptide, neural	-1.3374	1.07225	-1.20681	3
Sec14l2	SEC14L2	67815	ENSMUSG00000003585	SEC14-like 2 (S. cerevisiae)	-0.878365	0.822115	-0.85249	0
Selenbp1	SELENBP1	20341	ENSMUSG00000068874	selenium binding protein 1	-0.711684	0.791439	-0.478058	2
Sema3a	SEMA3A	20346	ENSMUSG00000028883	sema domain, immunoglobulin domain (Ig), short basic domain, secreted, (semaphorin) 3A	-0.753465	1.00098	-1.14454	1
Serpine2	SERPINE2	20720	ENSMUSG00000026249	serine (or cysteine) peptidase inhibitor, clade E, member 2	-0.843079	0.842417	-1.15142	3
Shisa9	SHISA9	72555	ENSMUSG00000022494	shisa family member 9	-1.55329	1.7934	-1.48407	3
Slc12a4	SLC12A4	20498	ENSMUSG00000017765	solute carrier family 12, member 4	-0.443915	0.802828	-0.485053	0
Slc30a3	SLC30A3	22784	ENSMUSG00000029151	solute carrier family 30 (zinc transporter), member 3	-0.634323	1.28448	-0.838252	1
Slc9a3r1	SLC9A3R1	26941	ENSMUSG00000020733	solute carrier family 9 (sodium/hydrogen exchanger), member 3 regulator 1	-1.26957	0.883026	-1.11384	0
Slitrk6	SLITRK6	239250	ENSMUSG00000045871	SLIT and NTRK-like family, member 6	-0.87314	0.792397	-0.524618	2
Smpdl3a	SMPDL3A	57319	ENSMUSG00000019872	sphingomyelin phosphodiesterase, acid-like 3A	-0.791688	0.725441	-0.710176	3
Sox8	SOX8	20681	ENSMUSG00000024176	SRY (sex determining region Y)-box 8	-1.61759	1.28595	-2.01576	3
Sparcl1	SPARCL1	13602	ENSMUSG00000029309	SPARC-like 1	-0.908214	1.39981	-0.938797	3
Spred2	SPRED2	114716	ENSMUSG00000045671	sprouty-related, EVH1 domain containing 2	-1.39316	0.511994	-1.10112	0
St5	ST5	76954	ENSMUSG00000031024	suppression of tumorigenicity 5	-0.452792	0.652526	-0.400413	0
Tagln2	TAGLN2	21346	ENSMUSG00000026547	transgelin 2	-0.402032	0.972192	-0.511129	0
Tbc1d4	TBC1D4	210789	ENSMUSG00000033083	TBC1 domain family, member 4	-0.555102	0.911746	-0.4157	0
Timp4	TIMP4	110595	ENSMUSG00000030317	tissue inhibitor of metalloproteinase 4	-2.63224	2.78824	-4.20636	3
Tnc	TNC	21923	ENSMUSG00000028364	tenascin C	-1.13118	2.14605	-1.41514	3
Trhde	TRHDE	237553	ENSMUSG00000050663	TRH-degrading enzyme	-0.456243	1.87109	-0.487725	0
Tril	TRIL	66873	ENSMUSG00000043496	TLR4 interactor with leucine-rich repeats	-0.501238	0.558426	-0.799843	3
Ttyh2	TTYH2	117160	ENSMUSG00000034714	tweety homolog 2 (Drosophila)	-0.485834	0.884948	-0.452977	2
Vwa5b1	VWA5B1	75718	ENSMUSG00000028753	von Willebrand factor A domain containing 5B1	-1.06469	1.5543	-2.12046	0
Wnt5a	WNT5A	22418	ENSMUSG00000021994	wingless-type MMTV integration site family, member 5A	-0.743752	0.730357	-0.759969	0
Note: * scoring criteria: 0, no expression; 1, expressed in Purkinje cells; 2, expression in Purkinje cell layer but not sure in which cell type 3, expressed in Bergmann glia; NA, no ISH data

## Sheet: BG.specificGene (WGNCA)
Symbol	hSymbol	description	Module	MM.red	kWithin	GS.Weighted	GS	Z.Weighted	Z.Standard	Pollen	bRG_concensus	BG_DE	Score*
1110032F04Rik	C3orf80	RIKEN cDNA 1110032F04 gene	red	0.893842	4.42341	-0.677473	-0.741955	-10.6343	-5.50612	no	no	yes	NA
1700084C01Rik	C1orf110	RIKEN cDNA 1700084C01 gene	turquoise	0.852881	4.59054	-0.768909	-0.684249	-9.77496	-4.54344	no	no	yes	NA
2810459M11Rik	C2orf72	RIKEN cDNA 2810459M11 gene	darkturquoise	0.791304	24.2967	-0.395362	-0.337297	-5.88715	-2.58709	no	no	yes	0
A930017K11Rik	PRR35	RIKEN cDNA A930017K11 gene	darkturquoise	0.72805	21.737	-0.637526	-0.498768	-5.97644	-2.83687	no	no	yes	NA
Abat	ABAT	4-aminobutyrate aminotransferase	red	0.770512	1.57652	-0.495522	-0.730686	-7.08774	-5.05968	yes	no	no	1
Abcb9	ABCB9	ATP-binding cassette, sub-family B (MDR/TAP), member 9	red	0.816731	2.9102	-0.6416	-0.754041	-9.127	-5.72905	no	no	yes	2
Abhd3	ABHD3	abhydrolase domain containing 3	red	0.683082	0.309173	-0.361482	-0.391551	-3.80336	-2.2787	no	no	no	1
Abhd4	ABHD4	abhydrolase domain containing 4	red	0.882322	1.65655	-0.612293	-0.679208	-9.09888	-4.71593	no	no	no	3
Acadl	ACADL	acyl-Coenzyme A dehydrogenase, long-chain	grey	0.68374	5.09336	-0.445933	-0.676963	-5.64652	-4.74787	no	no	no	3
Ackr2	ACKR2	atypical chemokine receptor 2	red	0.707086	0.553689	-0.559187	-0.667303	-6.47829	-4.63923	no	no	no	0
Acot1	ACOT2	acyl-CoA thioesterase 1	red	0.721263	0.671858	-0.397163	-0.529868	-4.42564	-3.13142	no	no	no	NA
Acsbg1	ACSBG1	acyl-CoA synthetase bubblegum family member 1	red	0.822761	4.73293	-0.629845	-0.861369	-10.1851	-7.43299	yes	yes	yes	3
Adamts20	ADAMTS20	a disintegrin-like and metallopeptidase (reprolysin type) with thrombospondin type 1 motif, 20	darkturquoise	0.726039	12.8894	-0.389065	-0.356124	-4.33659	-2.15923	no	no	no	0
Adcy1	ADCY1	adenylate cyclase 1	darkturquoise	0.662003	49.7257	-0.325421	-0.236819	-3.77911	-1.68518	no	no	no	0
Adgrg6	ADGRG6	adhesion G protein-coupled receptor G6	darkturquoise	0.789695	10.031	-0.464507	-0.402697	-6.08918	-2.97043	no	no	no	NA
Adhfe1	ADHFE1	alcohol dehydrogenase, iron containing, 1	red	0.68821	0.209284	-0.481848	-0.615194	-5.36959	-3.99676	no	no	no	0
Adm	ADM	adrenomedullin	red	0.659659	0.135207	-0.453104	-0.583831	-5.02715	-3.83904	no	no	no	0
Agtr2	AGTR2	angiotensin II receptor, type 2	red	0.675643	0.429879	-0.479811	-0.640913	-5.11074	-4.07504	no	no	no	0
Ak4	AK4	adenylate kinase 4	red	0.650874	0.414795	-0.380332	-0.551092	-4.1224	-3.64933	no	no	no	0
Aldh1l1	ALDH1L1	aldehyde dehydrogenase 1 family, member L1	red	0.935035	6.25717	-0.655186	-0.80464	-11.2223	-6.1977	no	no	yes	3
Ampd3	AMPD3	adenosine monophosphate deaminase 3	darkturquoise	0.833644	15.0875	-0.588634	-0.529292	-7.10903	-3.01538	no	no	no	0
Ano1	ANO1	anoctamin 1, calcium activated chloride channel	grey	0.653854	1.06276	-0.415342	-0.620614	-4.47929	-3.98526	no	no	no	0
Ano4	ANO4	anoctamin 4	darkturquoise	0.72764	38.918	-0.310731	-0.232524	-4.93549	-2.59256	no	no	no	0
Apcdd1	APCDD1	adenomatosis polyposis coli down-regulated 1	red	0.747039	0.516971	-0.49819	-0.640859	-5.9374	-4.19158	no	no	no	NA
Apln	APLN	apelin	red	0.681674	0.343493	-0.46813	-0.613728	-5.27828	-3.91593	no	no	no	0
Arhgap26	ARHGAP26	Rho GTPase activating protein 26	red	0.871754	2.36283	-0.585379	-0.716631	-9.27785	-5.18547	no	no	yes	1
Arhgef26	ARHGEF26	Rho guanine nucleotide exchange factor (GEF) 26	red	0.697966	1.02633	-0.467074	-0.538811	-4.76745	-3.04878	no	no	no	2
Arhgef4	ARHGEF4	Rho guanine nucleotide exchange factor (GEF) 4	red	0.850293	5.29291	-0.758339	-0.883231	-10.6342	-7.15276	no	no	yes	0
Arntl	ARNTL	aryl hydrocarbon receptor nuclear translocator-like	darkturquoise	0.699721	23.6396	-0.485842	-0.392686	-4.79239	-2.13541	no	no	no	1
Ass1	ASS1	argininosuccinate synthetase 1	red	0.83707	3.53802	-0.690708	-0.806814	-10.532	-6.74763	no	no	yes	NA
Atp1a2	ATP1A2	ATPase, Na+/K+ transporting, alpha 2 polypeptide	red	0.871602	3.60463	-0.666108	-0.89819	-11.4287	-7.95022	no	yes	yes	3
Atp1b2	ATP1B2	ATPase, Na+/K+ transporting, beta 2 polypeptide	grey	0.66718	6.71104	-0.314328	-0.244641	-3.59544	-1.72467	no	yes	no	3
Atp5s	ATP5S	ATP synthase, H+ transporting, mitochondrial F0 complex, subunit S	red	0.7226	0.309565	-0.443725	-0.532694	-5.01875	-3.1471	no	no	no	2
Atp9b	ATP9B	ATPase, class II, type 9B	red	0.701132	0.130505	-0.241706	-0.191412	-3.95096	-1.42069	no	no	no	0
Bcas1	BCAS1	breast carcinoma amplified sequence 1	red	0.740052	1.81399	-0.593374	-0.82585	-9.8912	-7.41064	no	no	no	0
Bcl2	BCL2	B cell leukemia/lymphoma 2	darkturquoise	0.790747	19.7929	-0.616432	-0.500087	-7.06352	-3.08807	no	no	no	2
Bhlhe22	BHLHE22	basic helix-loop-helix family, member e22	darkturquoise	0.662747	37.3935	-0.409593	-0.323285	-4.07544	-2.08093	no	no	no	0
Brinp3	BRINP3	bone morphogenetic protein/retinoic acid inducible neural specific 3	darkturquoise	0.769626	41.4673	-0.570905	-0.41281	-6.02279	-2.36857	no	no	yes	0
Btbd3	BTBD3	BTB (POZ) domain containing 3	darkturquoise	0.759228	30.1197	-0.434445	-0.346642	-5.46246	-2.22026	no	no	no	0
Cacng5	CACNG5	calcium channel, voltage-dependent, gamma subunit 5	darkturquoise	0.688519	6.50858	-0.352489	-0.358212	-3.99825	-2.11815	no	no	yes	3
Cadps2	CADPS2	Ca2+-dependent activator protein for secretion 2	darkturquoise	0.731293	21.1538	-0.277711	-0.189041	-4.82609	-1.96435	no	no	no	0
Calb1	CALB1	calbindin 1	darkturquoise	0.66697	21.8388	-0.19134	-0.118263	-3.65491	-1.62729	no	no	no	1
Calb2	CALB2	calbindin 2	darkturquoise	0.740719	31.8696	-0.518479	-0.39931	-5.25024	-2.48369	no	no	no	0
Camk2n1	CAMK2N1	calcium/calmodulin-dependent protein kinase II inhibitor 1	red	0.801411	2.08057	-0.568566	-0.850589	-9.92835	-7.61005	no	no	no	NA
Capn2	CAPN2	calpain 2	red	0.792808	1.31091	-0.633184	-0.656916	-7.2773	-4.16171	no	no	no	3
Car8	CA8	carbonic anhydrase 8	darkturquoise	0.731595	7.0392	-0.178803	-0.149912	-5.47817	-3.15634	no	no	yes	1
Cbs	CBS	cystathionine beta-synthase	red	0.835186	2.2506	-0.575702	-0.739234	-9.09978	-6.08361	no	no	yes	3
Ccdc149	CCDC149	coiled-coil domain containing 149	darkturquoise	0.745436	32.0589	-0.354557	-0.287443	-4.99563	-2.1622	no	no	no	NA
Ccdc37	CCDC37	coiled-coil domain containing 37	red	0.888939	4.1669	-0.570992	-0.655245	-9.0332	-4.85547	no	no	yes	2
Cck	CCK	cholecystokinin	darkturquoise	0.662651	8.69531	-0.233119	-0.182596	-3.96002	-2.3546	no	no	no	1
Ccrn4l	CCRN4L	CCR4 carbon catabolite repression 4-like (S. cerevisiae)	grey	0.68968	4.2374	-0.385127	-0.32228	-5.16518	-2.96102	no	no	no	0
Cd44	CD44	CD44 antigen	red	0.850868	1.11578	-0.585664	-0.737717	-9.23682	-5.70276	no	no	yes	0
Cd83	CD83	CD83 antigen	red	0.930816	7.97362	-0.793903	-0.887797	-13.1123	-8.27342	no	no	yes	0
Cd9	CD9	CD9 antigen	red	0.865603	2.03815	-0.507519	-0.493452	-7.18185	-3.038	no	no	no	3
Cdh10	CDH10	cadherin 10	darkturquoise	0.751823	33.427	-0.449159	-0.338943	-5.0991	-2.14188	no	no	no	0
Cdh12	CDH12	cadherin 12	red	0.689506	1.25726	-0.13361	-0.0818374	-5.02353	-2.40568	no	no	no	0
Cdh20	CDH20	cadherin 20	red	0.9194	7.2557	-0.745752	-0.900334	-12.2632	-8.07657	no	no	no	3
Cdh4	CDH4	cadherin 4	red	0.69033	2.50273	-0.681367	-0.624747	-6.20617	-4.02544	no	no	no	0
Cdh7	CDH7	cadherin 7, type 2	darkturquoise	0.667825	11.4516	-0.254934	-0.264408	-3.89938	-2.29361	no	no	yes	0
Cdh9	CDH9	cadherin 9	darkturquoise	0.690887	15.2313	-0.332547	-0.263709	-4.0794	-2.02536	no	no	no	0
Cdk6	CDK6	cyclin-dependent kinase 6	red	0.893544	4.69882	-0.711631	-0.87684	-10.4473	-6.72404	yes	no	yes	0
Cenpi	CENPI	centromere protein I	red	0.652116	0.435438	-0.400101	-0.616397	-4.56354	-4.04608	no	no	no	0
Cep250	CEP250	centrosomal protein 250	turquoise	0.692608	3.72299	-0.628349	-0.622342	-6.90367	-3.96639	no	no	no	0
Chmp2b	CHMP2B	charged multivesicular body protein 2B	red	0.683804	1.46841	-0.510815	-0.472019	-4.40837	-2.3368	no	no	no	3
Chn2	CHN2	chimerin 2	darkturquoise	0.770559	25.829	-0.623226	-0.461485	-5.78849	-3.09813	no	no	no	0
Chrm4	CHRM4	cholinergic receptor, muscarinic 4	red	0.814853	3.33139	-0.66382	-0.790018	-10.0958	-6.3355	no	no	yes	1
Chrnb4	CHRNB4	cholinergic receptor, nicotinic, beta polypeptide 4	red	0.67876	1.14573	-0.49172	-0.527799	-4.99583	-3.05223	no	no	no	NA
Clip4	CLIP4	CAP-GLY domain containing linker protein family, member 4	darkturquoise	0.71338	38.9951	-0.473054	-0.383323	-4.62784	-2.01848	no	no	no	0
Cmtm5	CMTM5	CKLF-like MARVEL transmembrane domain containing 5	grey	0.661622	2.52385	-0.192948	-0.251591	-3.46664	-2.6488	no	no	no	3
Cmya5	CMYA5	cardiomyopathy associated 5	grey	0.666615	7.95591	-0.202893	-0.229352	-4.38031	-3.1789	no	no	no	1
Cnpy1	CNPY1	canopy 1 homolog (zebrafish)	red	0.71513	0.372801	-0.474623	-0.657395	-5.67494	-4.4527	no	no	no	0
Cntn1	CNTN1	contactin 1	grey	0.674297	7.95698	-0.436477	-0.368584	-3.92922	-2.07967	no	no	no	0
Col4a5	COL4A5	collagen, type IV, alpha 5	grey	0.657611	4.67945	-0.512072	-0.764453	-7.03949	-6.3545	no	no	no	0
Col4a6	COL4A6	collagen, type IV, alpha 6	red	0.845878	3.32919	-0.634917	-0.868059	-11.4549	-8.76943	no	no	yes	1
Col5a3	COL5A3	collagen, type V, alpha 3	red	0.743425	0.964544	-0.465193	-0.608953	-5.73953	-3.95461	no	no	yes	0
Cpne2	CPNE2	copine II	grey	0.663089	2.00904	-0.550462	-0.775381	-7.43188	-6.5403	no	no	yes	3
Cpne8	CPNE8	copine VIII	red	0.872437	4.74002	-0.722125	-0.744382	-10.0532	-5.33156	no	no	yes	2
Cpne9	CPNE9	copine family member IX	darkturquoise	0.691156	42.2393	-0.417458	-0.309029	-4.37182	-1.77962	no	no	no	0
Ctdspl	CTDSPL	CTD (carboxy-terminal domain, RNA polymerase II, polypeptide A) small phosphatase-like	turquoise	0.706081	1.46913	-0.601733	-0.584152	-5.92371	-3.55582	no	no	no	0
Ctso	CTSO	cathepsin O	red	0.720607	1.26449	-0.535992	-0.797518	-8.10857	-6.74499	no	no	no	0
Cul1	CUL1	cullin 1	grey	0.706188	45.8603	-0.00256372	-0.158476	-5.09761	-3.64245	no	no	no	0
Cybrd1	CYBRD1	cytochrome b reductase 1	grey	0.722315	0.968146	-0.414221	-0.467076	-4.5535	-2.7937	no	no	no	0
Cygb	CYGB	cytoglobin	red	0.718341	0.565533	-0.614812	-0.629514	-7.00824	-4.2857	no	no	no	0
Cyp26b1	CYP26B1	cytochrome P450, family 26, subfamily b, polypeptide 1	red	0.801646	4.34756	-0.586836	-0.934993	-9.76753	-7.32085	no	no	no	0
Cyp2d22	CYP2D6	cytochrome P450, family 2, subfamily d, polypeptide 22	red	0.753425	0.272803	-0.589349	-0.727881	-7.30065	-5.0726	no	no	no	NA
Cyp2j9	CYP2J2	cytochrome P450, family 2, subfamily j, polypeptide 9	grey	0.706679	1.06122	-0.377356	-0.471229	-4.25433	-2.67819	no	no	no	3
Cyp4f15	CYP4F8	cytochrome P450, family 4, subfamily f, polypeptide 15	red	0.774298	0.367063	-0.426675	-0.563799	-5.24796	-3.32327	no	no	no	0
Cyp7b1	CYP7B1	cytochrome P450, family 7, subfamily b, polypeptide 1	grey	0.682943	2.83153	-0.415208	-0.517541	-4.18294	-3.02684	no	no	no	0
Dbi	DBI	diazepam binding inhibitor	darkturquoise	0.846914	8.1689	-0.472444	-0.441203	-7.71414	-3.63031	no	yes	no	3
Dbpht2	NA	DNA binding protein with his-thr domain	darkturquoise	0.807832	11.8575	-0.423742	-0.406249	-6.16351	-2.62083	no	no	yes	0
Dcbld1	DCBLD1	discoidin, CUB and LCCL domain containing 1	red	0.691436	0.074878	-0.451497	-0.650182	-5.55284	-4.1222	no	no	no	3
Ddah1	DDAH1	dimethylarginine dimethylaminohydrolase 1	red	0.838988	3.49628	-0.529346	-0.612581	-7.84389	-4.36434	no	no	yes	3
Dhrs2	DHRS2	dehydrogenase/reductase member 2	red	0.711665	0.977375	-0.537734	-0.609613	-5.64216	-3.93532	no	no	no	0
Dhrs3	DHRS3	dehydrogenase/reductase (SDR family) member 3	red	0.664253	1.73948	-0.602101	-0.514583	-4.72649	-2.43208	no	no	no	1
Dmd	DMD	dystrophin, muscular dystrophy	red	0.873901	4.15116	-0.652046	-0.669615	-8.77943	-4.33738	no	no	yes	2
Dock10	DOCK10	dedicator of cytokinesis 10	red	0.817571	1.4877	-0.547853	-0.66773	-7.26743	-4.56005	no	no	no	0
Dock5	DOCK5	dedicator of cytokinesis 5	red	0.672911	0.471516	-0.422823	-0.589741	-4.69115	-3.93535	no	no	no	0
Dok7	DOK7	docking protein 7	darkturquoise	0.679127	30.9463	-0.548082	-0.389754	-4.84967	-2.2069	no	no	no	0
Dpp10	DPP10	dipeptidylpeptidase 10	grey	0.659359	25.9033	-0.563406	-0.478034	-4.31461	-2.42216	no	no	no	1
Dsc2	DSC2	desmocollin 2	red	0.762304	0.968996	-0.479225	-0.572514	-6.01134	-3.63776	no	no	no	0
Dusp3	DUSP3	dual specificity phosphatase 3 (vaccinia virus phosphatase VH1-related)	red	0.760037	1.18046	-0.609283	-0.56541	-6.63286	-3.32726	no	no	no	0
Dusp5	DUSP5	dual specificity phosphatase 5	red	0.78077	1.67367	-0.555411	-0.610868	-7.38341	-3.98677	no	no	yes	0
Dusp6	DUSP6	dual specificity phosphatase 6	red	0.848223	5.04358	-0.735928	-0.903733	-12.6095	-8.82463	no	no	no	2
Dync1i1	DYNC1I1	dynein cytoplasmic 1 intermediate chain 1	darkturquoise	0.687904	20.603	-0.402568	-0.305311	-3.691	-1.82928	no	no	no	1
Ecm2	ECM2	extracellular matrix protein 2, female organ and adipocyte specific	grey	0.683195	2.03414	-0.422249	-0.584599	-4.58173	-3.74879	no	no	yes	0
Eda	EDA	ectodysplasin-A	red	0.776625	0.797384	-0.489439	-0.534552	-5.78405	-3.32167	no	no	no	0
Efhd1	EFHD1	EF hand domain containing 1	red	0.926702	4.58321	-0.706848	-0.746923	-10.3308	-4.53523	no	no	yes	0
Efna5	EFNA5	ephrin A5	grey	0.682726	8.95936	-0.448091	-0.397388	-3.71168	-1.76269	no	no	no	0
Egfl6	EGFL6	EGF-like-domain, multiple 6	red	0.753969	1.02946	-0.58405	-0.579996	-5.87027	-3.43657	no	no	no	0
Elovl5	ELOVL5	ELOVL family member 5, elongation of long chain fatty acids (yeast)	grey	0.716113	1.77923	-0.374814	-0.54549	-5.05575	-3.72946	no	no	no	3
Eps8	EPS8	epidermal growth factor receptor pathway substrate 8	red	0.750189	0.512429	-0.462547	-0.632116	-5.81244	-4.25005	no	no	no	0
Etfa	ETFA	electron transferring flavoprotein, alpha polypeptide	red	0.843638	2.98565	-0.652866	-0.875096	-11.0637	-8.11969	no	no	no	3
Ets2	ETS2	E26 avian leukemia oncogene 2, 3' domain	turquoise	0.662263	6.57992	-0.631104	-0.463941	-5.55289	-2.52128	no	no	no	0
Etv4	ETV4	ets variant 4	red	0.869225	7.50223	-0.732516	-0.916242	-12.3534	-7.96612	no	no	yes	3
Etv5	ETV5	ets variant 5	red	0.793473	8.78756	-0.768673	-0.964492	-6.57451	-3.46882	yes	yes	yes	3
Fabp7	FABP7	fatty acid binding protein 7, brain	red	0.837722	6.86724	-0.657424	-0.946725	-10.1547	-7.18121	yes	yes	yes	3
Fam149a	FAM149A	family with sequence similarity 149, member A	red	0.727015	0.972688	-0.539153	-0.686802	-6.73105	-5.07081	no	no	no	0
Fam19a2	FAM19A2	family with sequence similarity 19, member A2	darkturquoise	0.701122	41.5709	-0.331216	-0.243867	-4.30159	-1.76399	no	no	no	0
Fam81a	FAM81A	family with sequence similarity 81, member A	red	0.808628	1.42348	-0.636364	-0.758078	-8.8556	-5.90791	no	no	yes	0
Fbxo2	FBXO2	F-box protein 2	red	0.676527	0.0938084	-0.250551	-0.318077	-3.59499	-2.19807	no	no	yes	0
Fgfr1	FGFR1	fibroblast growth factor receptor 1	red	0.896773	3.35202	-0.716789	-0.782562	-10.9547	-6.39222	no	no	yes	3
Focad	FOCAD	focadhesin	red	0.673129	1.18664	-0.417591	-0.554964	-4.21889	-3.44476	no	no	no	0
Foxb1	FOXB1	forkhead box B1	red	0.679636	1.14878	-0.565567	-0.789607	-7.05219	-5.72421	no	no	no	0
Frrs1l	FRRS1L	ferric-chelate reductase 1 like	darkturquoise	0.689227	53.8557	-0.453406	-0.375312	-4.31645	-1.94351	no	no	no	1
Gabra4	GABRA4	gamma-aminobutyric acid (GABA) A receptor, subunit alpha 4	red	0.877422	4.35077	-0.616872	-0.616691	-8.57216	-4.08425	no	no	yes	0
Gabrb1	GABRB1	gamma-aminobutyric acid (GABA) A receptor, subunit beta 1	darkturquoise	0.777053	4.44667	-0.412537	-0.451445	-5.78839	-2.8115	yes	yes	yes	3
Galnt4	POC1B-GALNT4	UDP-N-acetyl-alpha-D-galactosamine:polypeptide N-acetylgalactosaminyltransferase 4	red	0.840895	1.07519	-0.615234	-0.656998	-8.59787	-4.55578	no	no	no	0
Gas2l3	GAS2L3	growth arrest-specific 2 like 3	red	0.767905	2.03818	-0.545577	-0.772018	-7.65433	-5.93872	no	no	yes	0
Gdnf	GDNF	glial cell line derived neurotrophic factor	grey	0.681192	1.81444	-0.288602	-0.343293	-3.7563	-2.58633	no	no	no	0
Gdpd2	GDPD2	glycerophosphodiester phosphodiesterase domain containing 2	red	0.865785	2.83637	-0.641485	-0.686347	-8.486	-4.45866	no	no	yes	0
Glrb	GLRB	glycine receptor, beta subunit	darkturquoise	0.800039	15.5858	-0.593309	-0.548944	-6.68849	-3.15628	no	no	no	1
Glud1	GLUD1	glutamate dehydrogenase 1	grey	0.658768	2.20131	-0.375733	-0.423884	-3.90375	-2.33278	no	no	no	2
Gm2974	NA	predicted gene 2974	red	0.771136	0.427774	-0.455065	-0.443426	-5.86221	-2.58211	no	no	no	NA
Gm2a	GM2A	GM2 ganglioside activator protein	red	0.739152	0.716221	-0.522132	-0.589789	-6.10384	-3.85513	no	no	no	3
Gm3739	NA	predicted gene 3739	red	0.651698	0.032204	-0.225957	-0.368985	-3.62745	-2.87789	no	no	no	NA
Gm7694	C1orf226	predicted gene 7694	red	0.665856	0.64248	-0.447636	-0.711954	-5.38884	-4.87676	no	no	yes	NA
Gnpda2	GNPDA2	glucosamine-6-phosphate deaminase 2	grey	0.686503	0.888688	-0.473245	-0.575758	-5.76069	-3.79565	no	no	no	0
Gpc4	GPC4	glypican 4	red	0.831805	5.25617	-0.615668	-0.884228	-10.7547	-8.88543	no	no	yes	0
Gpc5	GPC5	glypican 5	grey	0.742866	6.10487	-0.459717	-0.434094	-4.83502	-2.50399	no	no	no	0
Gper1	GPER1	G protein-coupled estrogen receptor 1	red	0.783665	2.16267	-0.570798	-0.776782	-9.21791	-5.91683	no	no	yes	0
Gpr3	GPR3	G-protein coupled receptor 3	red	0.659755	0.393504	-0.499139	-0.600672	-5.38682	-3.86942	no	no	no	0
Gpr37	GPR37	G protein-coupled receptor 37	darkturquoise	0.686525	20.0758	-0.279711	-0.210501	-4.15451	-2.06575	no	no	no	0
Gpt2	GPT2	glutamic pyruvate transaminase (alanine aminotransferase) 2	grey	0.676753	3.30998	-0.298498	-0.327712	-3.51519	-2.0257	no	no	no	2
Grid2	GRID2	glutamate receptor, ionotropic, delta 2	darkturquoise	0.784424	18.4687	-0.421582	-0.407377	-5.88175	-2.7343	no	no	yes	1
Grm3	GRM3	glutamate receptor, metabotropic 3	red	0.845352	3.82533	-0.578613	-0.564436	-7.60947	-3.63762	no	no	yes	0
Gsap	GSAP	gamma-secretase activating protein	red	0.713508	1.665	-0.500383	-0.609459	-6.01216	-4.13033	no	no	yes	3
Gstm1	NA	glutathione S-transferase, mu 1	red	0.936971	6.87719	-0.810963	-0.831517	-11.5808	-5.58962	no	no	yes	3
Gucy1a3	GUCY1A3	guanylate cyclase 1, soluble, alpha 3	red	0.809874	2.93309	-0.597502	-0.641646	-7.38157	-3.99293	no	no	yes	3
Gucy1b3	GUCY1B3	guanylate cyclase 1, soluble, beta 3	red	0.772386	1.58215	-0.32304	-0.320296	-5.91735	-3.12746	no	no	no	2
Gyg	GYG1	glycogenin	red	0.742057	0.983232	-0.431738	-0.48025	-5.01897	-3.18354	no	no	no	2
Hepacam	HEPACAM	hepatocyte cell adhesion molecule	grey	0.650071	4.01531	-0.318166	-0.352263	-3.21994	-1.97505	no	no	no	3
Hibadh	HIBADH	3-hydroxyisobutyrate dehydrogenase	red	0.651156	0.474636	-0.506729	-0.698317	-6.06491	-5.03478	no	no	no	2
Higd1b	HIGD1B	HIG1 domain family, member 1B	darkturquoise	0.684668	14.955	-0.356776	-0.318114	-4.16364	-1.88519	no	no	no	0
Hmgn3	HMGN3	high mobility group nucleosomal binding domain 3	red	0.859321	2.41478	-0.726505	-0.670546	-9.4526	-4.49189	no	no	no	0
Hopx	HOPX	HOP homeobox	red	0.754658	2.83736	-0.689474	-0.889282	-10.7857	-9.01693	yes	yes	no	3
Hs3st1	HS3ST1	heparan sulfate (glucosamine) 3-O-sulfotransferase 1	red	0.735626	0.959964	-0.565898	-0.685057	-7.21761	-4.85542	no	no	yes	0
Ift57	IFT57	intraflagellar transport 57	red	0.847287	1.66691	-0.255232	-0.244861	-7.6371	-3.60079	no	no	no	1
Igf2bp3	IGF2BP3	insulin-like growth factor 2 mRNA binding protein 3	turquoise	0.670352	3.21394	-0.333479	-0.409506	-6.34431	-4.44243	no	no	no	0
Il1rapl2	IL1RAPL2	interleukin 1 receptor accessory protein-like 2	darkturquoise	0.675806	42.9976	-0.40202	-0.260839	-4.02986	-2.06199	no	no	no	0
Isoc1	ISOC1	isochorismatase domain containing 1	darkturquoise	0.672064	8.83744	-0.354753	-0.307078	-4.13138	-2.28913	no	no	no	0
Itga6	ITGA6	integrin alpha 6	grey	0.71397	3.79361	-0.470399	-0.599303	-5.0346	-3.81533	no	no	no	3
Itm2b	ITM2B	integral membrane protein 2B	red	0.702987	0.935793	-0.314602	-0.340935	-3.60143	-2.05549	no	no	no	1
Kbtbd11	KBTBD11	kelch repeat and BTB (POZ) domain containing 11	red	0.899169	3.38537	-0.622838	-0.822374	-10.3967	-5.74463	no	no	no	0
Kcnc2	KCNC2	potassium voltage gated channel, Shaw-related subfamily, member 2	red	0.718378	1.47743	-0.533066	-0.731366	-7.3475	-5.58507	no	no	no	0
Kcnj10	KCNJ10	potassium inwardly-rectifying channel, subfamily J, member 10	red	0.674092	0.938976	-0.246708	-0.354333	-4.55687	-3.8219	no	no	yes	3
Kcnk1	KCNK1	potassium channel, subfamily K, member 1	darkturquoise	0.757096	33.0549	-0.606097	-0.446282	-5.77154	-2.29594	no	no	no	0
Kctd8	KCTD8	potassium channel tetramerisation domain containing 8	darkturquoise	0.71931	12.3619	-0.470958	-0.325184	-4.66671	-1.72643	no	no	no	0
Kitl	KITLG	kit ligand	darkturquoise	0.712645	20.7181	-0.516659	-0.438803	-4.86684	-2.43659	no	no	no	1
Klf10	KLF10	Kruppel-like factor 10	red	0.685293	0.402357	-0.432876	-0.639056	-4.93795	-4.13457	no	no	no	0
Klf15	KLF15	Kruppel-like factor 15	red	0.814372	2.47355	-0.567176	-0.762106	-8.87837	-5.99477	no	no	yes	0
Lcat	LCAT	lecithin cholesterol acyltransferase	red	0.77713	0.646619	-0.513428	-0.640427	-6.75243	-4.37493	no	no	no	3
Lgalsl	LGALSL	lectin, galactoside binding-like	darkturquoise	0.678746	38.7275	-0.394953	-0.307025	-4.0733	-1.70403	no	no	no	2
Lifr	LIFR	leukemia inhibitory factor receptor	red	0.887792	3.26777	-0.758285	-0.792709	-11.1347	-6.18673	yes	yes	no	3
Lingo2	LINGO2	leucine rich repeat and Ig domain containing 2	darkturquoise	0.686897	29.4752	-0.318007	-0.224735	-3.99639	-1.52382	no	no	no	0
Lingo3	LINGO3	leucine rich repeat and Ig domain containing 3	darkturquoise	0.696211	30.4042	-0.498231	-0.393228	-4.89582	-2.1897	no	no	no	1
Lmcd1	LMCD1	LIM and cysteine-rich domains 1	red	0.753592	3.24058	-0.54653	-0.854625	-8.51627	-7.0174	no	no	yes	2
Lmo4	LMO4	LIM domain only 4	darkturquoise	0.697118	6.16872	-0.415233	-0.330246	-4.14977	-1.94502	no	no	no	0
Lrrc58	LRRC58	leucine rich repeat containing 58	grey	0.667378	3.18157	-0.607444	-0.664139	-6.83531	-4.66252	no	no	no	2
Lsm6	LSM6	LSM6 homolog, U6 small nuclear RNA associated (S. cerevisiae)	red	0.677502	0.504578	-0.520614	-0.758671	-6.64788	-5.23193	no	no	no	0
Ltbp1	LTBP1	latent transforming growth factor beta binding protein 1	red	0.78333	2.09583	-0.589057	-0.836631	-9.3602	-7.6893	no	no	no	0
Luzp2	LUZP2	leucine zipper protein 2	grey	0.657607	3.28162	-0.334594	-0.417884	-3.71632	-2.69382	no	no	yes	3
Lxn	LXN	latexin	red	0.799558	2.50395	-0.668635	-0.71735	-8.88908	-4.93107	no	no	yes	3
Lynx1	NA	Ly6/neurotoxin 1	darkturquoise	0.740928	5.47905	-0.388439	-0.320062	-4.72377	-2.04901	no	no	no	0
Man2a1	MAN2A1	mannosidase 2, alpha 1	grey	0.721729	0.648626	-0.493783	-0.555734	-6.30798	-3.57687	no	no	no	0
Map4k5	MAP4K5	mitogen-activated protein kinase kinase kinase kinase 5	grey	0.678913	12.9675	-0.289139	-0.332809	-3.71253	-2.02755	no	no	no	2
Mboat1	MBOAT1	membrane bound O-acyltransferase domain containing 1	red	0.794232	3.96345	-0.62213	-0.919107	-9.50982	-7.82618	no	no	yes	0
Mcc	MCC	mutated in colorectal cancers	red	0.962222	5.47958	-0.750081	-0.750823	-11.2382	-5.20157	no	no	yes	2
Medag	MEDAG	mesenteric estrogen dependent adipogenesis	grey	0.697572	14.9413	-0.354823	-0.275508	-4.12069	-1.92961	no	no	no	0
Mef2c	MEF2C	myocyte enhancer factor 2C	red	0.673438	1.19111	-0.246711	-0.231734	-3.22249	-1.65324	no	no	no	1
Megf10	MEGF10	multiple EGF-like-domains 10	red	0.847975	4.43057	-0.571632	-0.820972	-9.55933	-6.7791	no	no	no	0
Metrn	METRN	meteorin, glial cell differentiation regulator	turquoise	0.671374	4.04659	-0.682002	-0.75535	-8.10123	-5.76237	no	no	yes	3
Mgat4c	MGAT4C	MGAT4 family, member C	grey	0.663729	21.5399	-0.291921	-0.230617	-3.71925	-1.74006	no	no	no	0
Mgst1	MGST1	microsomal glutathione S-transferase 1	red	0.884855	1.52801	-0.639275	-0.698349	-9.22944	-4.50161	no	no	no	0
Mmp9	MMP9	matrix metallopeptidase 9	darkturquoise	0.690052	15.6525	-0.437228	-0.359292	-4.2082	-2.04318	no	no	no	0
Msc	MSC	musculin	darkturquoise	0.672715	7.88617	-0.390774	-0.324082	-3.5716	-1.60026	no	no	no	0
Mt3	MT3	metallothionein 3	red	0.687865	0.625148	-0.450339	-0.517283	-5.0583	-3.07771	yes	yes	yes	3
Mtss1	MTSS1	metastasis suppressor 1	darkturquoise	0.846166	11.5854	-0.600032	-0.478675	-7.44799	-3.30756	no	no	no	1
Mtss1l	MTSS1L	metastasis suppressor 1-like	grey	0.675195	17.7774	-0.477715	-0.359008	-4.70963	-3.1963	no	no	no	3
Mybpc1	MYBPC1	myosin binding protein C, slow-type	darkturquoise	0.767209	17.2355	-0.568387	-0.471773	-5.7536	-2.55859	no	no	yes	3
Myo16	MYO16	myosin XVI	darkturquoise	0.671184	57.5884	-0.452988	-0.320749	-3.67632	-1.59575	no	no	no	3
Nab1	NAB1	Ngfi-A binding protein 1	turquoise	0.760112	5.16504	-0.603833	-0.522526	-7.35075	-3.50427	no	no	no	0
Ndrg2	NDRG2	N-myc downstream regulated gene 2	darkturquoise	0.831346	18.2246	-0.463568	-0.401246	-6.97655	-2.93317	no	no	no	3
Ndst4	NDST4	N-deacetylase/N-sulfotransferase (heparin glucosaminyl) 4	grey	0.723382	18.2186	-0.206475	-0.198024	-5.39327	-3.14387	no	no	yes	0
Necab1	NECAB1	N-terminal EF-hand calcium binding protein 1	darkturquoise	0.727747	25.6539	-0.541628	-0.466292	-4.98784	-2.51558	no	no	no	0
Nedd9	NEDD9	neural precursor cell expressed, developmentally down-regulated gene 9	red	0.836526	4.08394	-0.627359	-0.879899	-10.546	-8.54059	no	no	yes	0
Nhlrc4	NHLRC4	NHL repeat containing 4	darkturquoise	0.671068	25.4178	-0.379899	-0.289781	-4.03256	-1.83995	no	no	no	NA
Nhs	NHS	Nance-Horan syndrome (human)	grey	0.677803	6.45556	-0.367008	-0.393971	-3.93471	-2.58894	no	no	no	0
Nid1	NID1	nidogen 1	red	0.733866	0.967799	-0.331019	-0.41712	-3.77358	-2.23617	no	no	no	0
Npas3	NPAS3	neuronal PAS domain protein 3	darkturquoise	0.704283	45.3525	-0.500956	-0.357141	-4.85243	-2.21056	no	no	no	0
Nrbp2	NRBP2	nuclear receptor binding protein 2	red	0.813158	2.12374	-0.613302	-0.585333	-6.82319	-3.57725	no	no	no	0
Nrip3	NRIP3	nuclear receptor interacting protein 3	darkturquoise	0.708784	41.0389	-0.484494	-0.410086	-4.84503	-2.36276	no	no	no	2
Ntng2	NTNG2	netrin G2	red	0.828827	3.64509	-0.693278	-0.692563	-8.8228	-4.88288	no	no	yes	0
Nwd1	NWD1	NACHT and WD repeat domain containing 1	red	0.899364	6.01844	-0.679023	-0.849645	-11.1662	-7.05783	no	no	yes	3
Nxn	NXN	nucleoredoxin	darkturquoise	0.701535	1.79846	-0.484577	-0.447765	-4.81648	-2.58049	no	no	no	0
Oat	OAT	ornithine aminotransferase	red	0.659305	0.864851	-0.310793	-0.410889	-3.94944	-3.32347	no	no	no	3
Ola1	OLA1	Obg-like ATPase 1	grey	0.699994	6.56088	-0.414162	-0.469614	-4.64935	-2.83624	no	no	no	2
Opcml	OPCML	opioid binding protein/cell adhesion molecule-like	grey	0.667175	6.80047	-0.378309	-0.432489	-3.76433	-2.31006	no	no	no	0
P2rx4	P2RX4	purinergic receptor P2X, ligand-gated ion channel 4	grey	0.690827	0.847445	-0.387702	-0.552378	-4.30947	-3.33005	no	no	no	2
P2rx7	P2RX7	purinergic receptor P2X, ligand-gated ion channel, 7	red	0.733565	0.763082	-0.458435	-0.720094	-6.48428	-4.88379	no	no	no	0
P2ry1	P2RY1	purinergic receptor P2Y, G-protein coupled 1	red	0.817675	0.700627	-0.559846	-0.712543	-7.59808	-4.8249	no	no	no	0
P4ha3	P4HA3	procollagen-proline, 2-oxoglutarate 4-dioxygenase (proline 4-hydroxylase), alpha polypeptide III	darkturquoise	0.838407	2.66435	-0.611389	-0.589617	-7.42081	-3.7618	no	no	yes	0
Paqr8	PAQR8	progestin and adipoQ receptor family member VIII	red	0.831773	4.30934	-0.616871	-0.862924	-10.3791	-6.99952	yes	yes	yes	3
Pcdh20	PCDH20	protocadherin 20	red	0.781159	1.03561	-0.57576	-0.709056	-8.59889	-5.17263	no	no	yes	3
Pcx	PC	pyruvate carboxylase	darkturquoise	0.697587	1.27435	-0.443924	-0.405532	-4.33111	-2.19356	no	no	no	3
Pde1a	PDE1A	phosphodiesterase 1A, calmodulin-dependent	red	0.734804	0.584181	-0.525535	-0.688945	-6.24849	-4.50916	no	no	no	0
Pde3a	PDE3A	phosphodiesterase 3A, cGMP inhibited	red	0.736757	1.90317	-0.502254	-0.622804	-5.50661	-4.04032	no	no	yes	0
Pdgfc	PDGFC	platelet-derived growth factor, C polypeptide	red	0.877752	5.99324	-0.713982	-0.932606	-12.157	-9.85788	no	no	no	0
Pdha1	PDHA1	pyruvate dehydrogenase E1 alpha 1	turquoise	0.706299	7.36065	-0.662981	-0.596559	-7.1093	-4.00318	no	no	no	1
Pdlim3	PDLIM3	PDZ and LIM domain 3	red	0.880177	5.03403	-0.690508	-0.70002	-9.46017	-4.61796	no	no	yes	0
Pdpn	PDPN	podoplanin	grey	0.766369	2.06655	-0.651127	-0.816669	-9.46928	-6.34861	no	no	no	2
Pea15a	PEA15	phosphoprotein enriched in astrocytes 15A	red	0.745998	2.95506	-0.520129	-0.798723	-8.38219	-7.19892	no	yes	no	1
Per2	PER2	period circadian clock 2	red	0.759803	2.76748	-0.69611	-0.644014	-7.49496	-4.22837	no	no	no	0
Pgm2	PGM1	phosphoglucomutase 2	turquoise	0.782963	8.34135	-0.705345	-0.586874	-8.76999	-4.03308	no	no	no	1
Phka1	PHKA1	phosphorylase kinase alpha 1	red	0.798121	1.89364	-0.496519	-0.676514	-6.81878	-4.63835	no	no	no	3
Pla2g12a	PLA2G12A	phospholipase A2, group XIIA	red	0.678045	1.0773	-0.478915	-0.532792	-4.672	-3.28768	no	no	no	0
Pla2g7	PLA2G7	phospholipase A2, group VII (platelet-activating factor acetylhydrolase, plasma)	red	0.861425	2.75097	-0.677487	-0.745196	-10.0288	-5.45841	no	no	yes	3
Pld1	PLD1	phospholipase D1	grey	0.654685	2.39579	-0.39272	-0.607803	-4.13227	-3.71011	no	no	yes	0
Plekha2	PLEKHA2	pleckstrin homology domain-containing, family A (phosphoinositide binding specific) member 2	red	0.787164	1.39768	-0.334087	-0.301282	-5.57103	-2.59496	no	no	yes	0
Plekhb1	PLEKHB1	pleckstrin homology domain containing, family B (evectins) member 1	red	0.864754	3.10392	-0.571865	-0.628965	-7.99595	-4.23768	no	no	yes	0
Plekhg1	PLEKHG1	pleckstrin homology domain containing, family G (with RhoGef domain) member 1	red	0.682175	1.0704	-0.415957	-0.42418	-3.77209	-2.48681	no	no	no	0
Plekhh2	PLEKHH2	pleckstrin homology domain containing, family H (with MyTH4 domain) member 2	red	0.753665	0.842594	-0.548736	-0.669075	-6.50734	-4.73557	no	no	no	0
Plscr1	PLSCR1	phospholipid scramblase 1	red	0.677436	0.702869	-0.54092	-0.859895	-8.37172	-8.06702	no	no	no	0
Plscr4	PLSCR4	phospholipid scramblase 4	red	0.778504	0.598803	-0.569492	-0.811305	-9.07757	-6.90286	no	no	no	2
Ppap2b	PPAP2B	phosphatidic acid phosphatase type 2B	red	0.798205	1.62092	-0.526764	-0.727755	-7.36335	-5.25202	no	no	no	3
Ppp1r14c	PPP1R14C	protein phosphatase 1, regulatory (inhibitor) subunit 14c	darkturquoise	0.697106	19.9498	-0.533689	-0.46365	-5.40517	-2.78469	no	no	yes	0
Prr18	PRR18	proline rich 18	red	0.810125	2.93686	-0.601275	-0.601281	-7.29646	-3.95004	no	no	no	0
Prr5	PRR5	proline rich 5 (renal)	red	0.709002	1.40967	-0.61415	-0.594733	-5.92588	-3.85899	no	no	no	2
Prrt4	PRRT4	proline-rich transmembrane protein 4	red	0.661131	0.450124	-0.489835	-0.451654	-5.40861	-3.3773	no	no	no	0
Prss23	PRSS23	protease, serine 23	turquoise	0.742488	12.1094	-0.760861	-0.712986	-8.79083	-4.76741	no	no	yes	0
Pth2r	PTH2R	parathyroid hormone 2 receptor	grey	0.675841	9.50367	-0.254883	-0.231768	-3.72567	-2.16397	no	no	no	0
Ptn	PTN	pleiotrophin	red	0.875229	3.56902	-0.663059	-0.827236	-10.9544	-7.55094	no	yes	yes	3
Ptpn3	PTPN3	protein tyrosine phosphatase, non-receptor type 3	grey	0.738359	9.7264	-0.338179	-0.339674	-4.58587	-2.41518	no	no	no	0
Ptpn9	PTPN9	protein tyrosine phosphatase, non-receptor type 9	red	0.886577	5.1599	-0.783405	-0.843884	-12.3236	-7.24393	no	no	no	2
Ptpra	PTPRA	protein tyrosine phosphatase, receptor type, A	grey	0.667905	26.8134	-0.57787	-0.468166	-4.48855	-2.2121	no	no	no	0
Ptprj	PTPRJ	protein tyrosine phosphatase, receptor type, J	darkturquoise	0.697062	44.9	-0.401404	-0.311464	-4.10041	-1.72384	no	no	no	0
Ptprz1	PTPRZ1	protein tyrosine phosphatase, receptor type Z, polypeptide 1	red	0.732449	2.02135	-0.462609	-0.658278	-6.7189	-5.14758	yes	yes	yes	3
Pxdc1	PXDC1	PX domain containing 1	grey	0.710688	0.54476	-0.536604	-0.788711	-7.71877	-6.67657	no	no	no	2
Rab36	RAB36	RAB36, member RAS oncogene family	red	0.710194	0.601477	-0.513696	-0.541611	-5.69969	-3.50412	no	no	no	0
Rab8b	RAB8B	RAB8B, member RAS oncogene family	grey	0.656395	5.63772	-0.422508	-0.532121	-4.29685	-3.09916	no	no	no	0
Ramp1	RAMP1	receptor (calcitonin) activity modifying protein 1	darkturquoise	0.661222	3.69136	-0.217152	-0.193245	-3.24781	-1.57928	no	no	no	0
Ramp3	RAMP3	receptor (calcitonin) activity modifying protein 3	red	0.766525	0.505783	-0.556739	-0.499161	-6.49391	-3.1263	no	no	no	0
Rasa3	RASA3	RAS p21 protein activator 3	red	0.931595	6.30001	-0.678078	-0.788369	-11.1245	-6.24742	no	no	yes	0
Rasgef1c	RASGEF1C	RasGEF domain family, member 1C	darkturquoise	0.724239	56.8042	-0.499512	-0.376988	-5.08795	-2.24638	no	no	yes	0
Rasgrp2	RASGRP2	RAS, guanyl releasing protein 2	darkturquoise	0.785338	2.88341	-0.49681	-0.425805	-5.73956	-2.44001	no	no	no	2
Rassf2	RASSF2	Ras association (RalGDS/AF-6) domain family member 2	red	0.688069	1.91594	-0.616983	-0.640535	-7.07595	-4.28418	no	no	no	NA
Rbms1	RBMS1	RNA binding motif, single stranded interacting protein 1	darkturquoise	0.717125	36.2687	-0.537915	-0.377347	-4.85703	-1.81105	no	no	no	1
Reps2	REPS2	RALBP1 associated Eps domain containing protein 2	red	0.770993	1.7139	-0.386466	-0.35097	-6.04162	-2.91266	no	no	no	2
Rftn2	RFTN2	raftlin family member 2	red	0.739446	0.19415	-0.369252	-0.518878	-4.41939	-2.81729	no	no	no	2
Rgs10	RGS10	regulator of G-protein signalling 10	darkturquoise	0.666466	21.8894	-0.416559	-0.312183	-4.03746	-1.61973	no	no	no	0
Rgs20	RGS20	regulator of G-protein signaling 20	red	0.735756	0.733436	-0.498326	-0.643376	-6.39817	-4.37461	no	no	no	0
Rgs4	RGS4	regulator of G-protein signaling 4	darkturquoise	0.692909	19.6282	-0.323385	-0.25288	-4.13391	-1.87559	no	no	no	2
Rlbp1	RLBP1	retinaldehyde binding protein 1	darkturquoise	0.68854	6.68105	-0.424635	-0.430028	-4.503	-2.5388	no	no	no	0
Rnf141	RNF141	ring finger protein 141	darkturquoise	0.705207	9.57933	-0.44036	-0.423073	-4.45025	-2.29539	no	no	no	0
Rora	RORA	RAR-related orphan receptor alpha	darkturquoise	0.716501	36.5815	-0.527874	-0.39325	-5.10905	-2.0451	no	no	no	1
Rprm	RPRM	reprimo, TP53 dependent G2 arrest mediator candidate	red	0.730875	1.23223	-0.535549	-0.720612	-6.53978	-4.89348	no	no	no	0
Rxfp3	RXFP3	relaxin family peptide receptor 3	darkturquoise	0.713782	23.1135	-0.445681	-0.360642	-4.66565	-1.99702	no	no	no	0
S100b	S100B	S100 protein, beta polypeptide, neural	red	0.753051	0.860963	-0.445365	-0.540671	-5.63759	-3.47147	no	no	yes	3
Samd3	SAMD3	sterile alpha motif domain containing 3	darkturquoise	0.702902	20.3831	-0.404904	-0.359335	-4.5227	-2.31473	no	no	no	0
Scrn1	SCRN1	secernin 1	red	0.745594	2.53436	-0.558299	-0.837855	-8.12839	-6.73723	no	no	no	0
Scube2	SCUBE2	signal peptide, CUB domain, EGF-like 2	darkturquoise	0.668562	4.16006	-0.454106	-0.456045	-4.5186	-2.67611	no	no	no	0
Sec14l2	SEC14L2	SEC14-like 2 (S. cerevisiae)	red	0.805266	1.33029	-0.517021	-0.704096	-7.70826	-5.13497	no	no	yes	0
Selenbp1	SELENBP1	selenium binding protein 1	red	0.859467	1.7344	-0.626221	-0.637925	-8.23322	-4.01879	no	no	yes	0
Sema3a	SEMA3A	sema domain, immunoglobulin domain (Ig), short basic domain, secreted, (semaphorin) 3A	red	0.693228	1.21332	-0.241776	-0.328396	-3.94933	-3.03694	no	no	yes	1
Sema6a	SEMA6A	sema domain, transmembrane domain (TM), and cytoplasmic domain, (semaphorin) 6A	turquoise	0.683463	8.04625	-0.658766	-0.60989	-6.11593	-3.87065	no	no	no	0
Serpine2	SERPINE2	serine (or cysteine) peptidase inhibitor, clade E, member 2	red	0.783565	3.02447	-0.562343	-0.831671	-9.21394	-7.63363	no	no	yes	3
Sfxn5	SFXN5	sideroflexin 5	darkturquoise	0.782341	27.7322	-0.461554	-0.372001	-5.41422	-2.1198	no	no	no	3
Sgk1	SGK1	serum/glucocorticoid regulated kinase 1	red	0.802273	1.34282	-0.52074	-0.465818	-6.77288	-2.79764	no	no	no	0
Sgpp1	SGPP1	sphingosine-1-phosphate phosphatase 1	red	0.878312	1.23872	-0.5891	-0.591746	-7.87833	-3.19012	no	no	no	0
Shc3	SHC3	src homology 2 domain-containing transforming protein C3	red	0.862089	7.78738	-0.739228	-0.970681	-12.6372	-10.7715	no	no	no	0
Shc4	SHC4	SHC (Src homology 2 domain containing) family, member 4	red	0.679066	2.46069	-0.61287	-0.781077	-8.97053	-6.54792	no	no	no	0
Shisa9	SHISA9	shisa family member 9	red	0.945061	7.98294	-0.731021	-0.721145	-10.7831	-4.8506	no	no	yes	2
Slc1a3	SLC1A3	solute carrier family 1 (glial high affinity glutamate transporter), member 3	red	0.895316	3.00639	-0.497115	-0.444243	-8.31351	-3.49122	no	yes	no	3
Slc22a8	SLC22A8	solute carrier family 22 (organic anion transporter), member 8	grey	0.734882	1.64911	-0.482311	-0.450113	-4.95366	-2.46199	no	no	no	0
Slc30a3	SLC30A3	solute carrier family 30 (zinc transporter), member 3	red	0.686329	0.692797	-0.394983	-0.516457	-4.54089	-3.40924	no	no	yes	1
Slc38a5	SLC38A5	solute carrier family 38, member 5	red	0.79708	1.76471	-0.670314	-0.58658	-7.41356	-3.36132	no	no	no	0
Slc7a1	SLC7A1	solute carrier family 7 (cationic amino acid transporter, y+ system), member 1	red	0.71525	1.67249	-0.654113	-0.528429	-5.5511	-2.58404	no	no	no	0
Slc9a3r1	SLC9A3R1	solute carrier family 9 (sodium/hydrogen exchanger), member 3 regulator 1	red	0.757999	1.61837	-0.588941	-0.780536	-9.49316	-7.23624	no	yes	yes	2
Slitrk2	SLITRK2	SLIT and NTRK-like family, member 2	darkturquoise	0.804922	6.64869	-0.48598	-0.521989	-6.54894	-3.4058	yes	yes	no	2
Slitrk6	SLITRK6	SLIT and NTRK-like family, member 6	red	0.825579	2.73283	-0.632805	-0.647856	-7.79476	-4.16088	no	no	yes	0
Smarca2	SMARCA2	SWI/SNF related, matrix associated, actin dependent regulator of chromatin, subfamily a, member 2	grey	0.665841	22.1457	-0.331174	-0.332522	-3.4052	-1.65767	no	no	no	2
Smim13	SMIM13	small integral membrane protein 13	darkturquoise	0.71262	18.1036	-0.517322	-0.462696	-5.1507	-2.5571	no	no	no	2
Smpdl3a	SMPDL3A	sphingomyelin phosphodiesterase, acid-like 3A	red	0.845843	2.4445	-0.577469	-0.713862	-8.42252	-5.22283	no	no	yes	3
Snca	SNCA	synuclein, alpha	red	0.754804	1.81285	-0.234114	-0.192208	-6.39866	-3.18187	no	no	no	0
Sncaip	SNCAIP	synuclein, alpha interacting protein (synphilin)	grey	0.686332	9.24594	-0.429284	-0.502424	-4.29276	-2.6756	no	no	no	0
Snta1	SNTA1	syntrophin, acidic 1	grey	0.665999	0.203278	-0.494098	-0.614986	-5.66633	-3.69684	no	no	no	0
Snx14	SNX14	sorting nexin 14	grey	0.666836	2.26813	-0.294982	-0.327018	-3.3508	-1.79283	no	no	no	2
Sox8	SOX8	SRY (sex determining region Y)-box 8	red	0.749276	1.93838	-0.460607	-0.670131	-6.12711	-4.47754	no	no	yes	3
Sparcl1	SPARCL1	SPARC-like 1	red	0.897172	3.70627	-0.580814	-0.640935	-8.29132	-4.18104	no	no	yes	3
Sphk1	SPHK1	sphingosine kinase 1	darkturquoise	0.688662	9.30606	-0.32513	-0.22755	-4.1	-1.84958	no	no	no	NA
Spred1	SPRED1	sprouty protein with EVH-1 domain 1, related sequence	red	0.842578	7.4433	-0.740483	-0.966466	-11.5861	-9.12609	no	no	no	0
Spred2	SPRED2	sprouty-related, EVH1 domain containing 2	red	0.846128	6.69994	-0.775671	-0.929455	-11.9855	-8.34233	no	no	yes	0
Spred3	SPRED3	sprouty-related, EVH1 domain containing 3	red	0.735499	3.56266	-0.674474	-0.828635	-10.1239	-7.14119	no	no	no	0
Spry2	SPRY2	sprouty homolog 2 (Drosophila)	red	0.804449	5.80222	-0.628206	-0.950139	-10.8946	-10.2458	no	no	no	0
Spry4	SPRY4	sprouty homolog 4 (Drosophila)	red	0.803232	4.34482	-0.689646	-0.8825	-11.5806	-8.29782	no	no	no	0
Stk17b	STK17B	serine/threonine kinase 17b (apoptosis-inducing)	red	0.666533	0.645069	-0.42886	-0.663823	-5.32257	-4.51804	no	no	no	1
Stt3b	STT3B	STT3, subunit of the oligosaccharyltransferase complex, homolog B (S. cerevisiae)	red	0.810265	1.46677	-0.588139	-0.641952	-7.81449	-4.32902	no	no	no	1
Stxbp6	STXBP6	syntaxin binding protein 6 (amisyn)	darkturquoise	0.867128	17.712	-0.628685	-0.559435	-7.75276	-3.06449	no	no	no	0
Syndig1	SYNDIG1	synapse differentiation inducing 1	red	0.767101	3.33741	-0.682988	-0.627534	-6.89513	-3.31555	no	no	no	1
Tacc1	TACC1	transforming, acidic coiled-coil containing protein 1	red	0.873839	3.41504	-0.579966	-0.670224	-8.59349	-4.76654	no	no	no	1
Tbc1d4	TBC1D4	TBC1 domain family, member 4	darkturquoise	0.8091	12.0057	-0.401468	-0.357402	-6.25765	-2.74446	no	no	yes	0
Tbx22	TBX22	T-box 22	red	0.701152	0.686569	-0.446381	-0.680017	-5.67161	-4.77633	no	no	no	0
Tdrd7	TDRD7	tudor domain containing 7	darkturquoise	0.75586	8.98234	-0.192806	-0.115666	-5.18742	-2.20641	no	no	no	0
Timp4	TIMP4	tissue inhibitor of metalloproteinase 4	red	0.804905	4.51072	-0.602249	-0.77968	-9.02935	-6.46124	no	no	yes	3
Tmc4	TMC4	transmembrane channel-like gene family 4	darkturquoise	0.740759	7.76022	-0.479332	-0.377776	-5.24491	-2.24298	no	no	no	0
Tmem154	TMEM154	transmembrane protein 154	red	0.762621	0.78792	-0.587407	-0.597361	-6.61401	-3.39985	no	no	no	0
Tmem173	TMEM173	transmembrane protein 173	red	0.764639	0.673971	-0.461223	-0.542312	-5.53094	-3.35281	no	no	no	0
Tnc	TNC	tenascin C	red	0.844032	4.46017	-0.728352	-0.731712	-9.65234	-5.31422	yes	yes	yes	3
Tnfaip1	TNFAIP1	tumor necrosis factor, alpha-induced protein 1 (endothelial)	red	0.652447	0.345578	-0.318666	-0.43838	-3.20365	-2.59947	no	no	no	NA
Tns3	TNS3	tensin 3	grey	0.670285	3.11204	-0.341451	-0.447887	-3.13955	-2.35649	no	no	no	0
Trhde	TRHDE	TRH-degrading enzyme	darkturquoise	0.787049	40.2327	-0.425018	-0.324908	-6.02974	-2.44554	no	no	yes	0
Trpc7	TRPC7	transient receptor potential cation channel, subfamily C, member 7	darkturquoise	0.727872	47.8576	-0.543251	-0.392815	-5.10282	-2.15146	no	no	no	0
Tsen15	TSEN15	tRNA splicing endonuclease 15 homolog (S. cerevisiae)	turquoise	0.843335	1.99943	-0.734966	-0.69447	-9.93651	-4.65983	no	no	no	0
Tspan7	TSPAN7	tetraspanin 7	darkturquoise	0.797769	15.2123	-0.641218	-0.565002	-6.809	-3.29967	no	no	no	0
Ttyh2	TTYH2	tweety homolog 2 (Drosophila)	red	0.88568	3.27206	-0.722542	-0.696219	-10.1022	-4.95244	no	no	yes	2
Ugp2	UGP2	UDP-glucose pyrophosphorylase 2	grey	0.698099	3.23737	-0.559027	-0.612743	-6.65079	-4.05668	no	yes	no	1
Ugt8a	UGT8	UDP galactosyltransferase 8A	darkturquoise	0.65097	9.1846	-0.195306	-0.159867	-3.31587	-1.44601	no	no	no	0
Usp46	USP46	ubiquitin specific peptidase 46	red	0.808003	2.48058	-0.594435	-0.594606	-7.91208	-3.82584	no	no	no	0
Vwa5b1	VWA5B1	von Willebrand factor A domain containing 5B1	grey	0.730804	0.850008	-0.599559	-0.720353	-7.12876	-5.33822	no	no	yes	0
Wif1	WIF1	Wnt inhibitory factor 1	red	0.743377	0.991473	-0.578303	-0.832454	-9.34788	-7.80923	no	no	no	3
Wnt7a	WNT7A	wingless-type MMTV integration site family, member 7A	red	0.698974	0.877797	-0.526531	-0.419831	-4.67298	-2.77049	no	no	no	0
Zadh2	ZADH2	zinc binding alcohol dehydrogenase, domain containing 2	grey	0.677901	0.772036	-0.439294	-0.640041	-5.08325	-4.30691	no	no	no	0
Zfp488	ZNF488	zinc finger protein 488	red	0.749685	0.803466	-0.510707	-0.599918	-6.14018	-3.69748	no	no	no	0
Zfp874a	NA	zinc finger protein 874a	red	0.655585	0.144795	-0.452026	-0.565191	-4.80885	-3.29412	no	no	no	0
Zfp951	ZNF878	zinc finger protein 951	red	0.728385	0.276027	-0.514918	-0.639371	-6.8968	-4.6433	no	no	no	NA
Note: * scoring criteria: 0, no expression; 1, expressed in Purkinje cells;
2, expression in Purkinje cell layer but not sure in which cell type
3, expressed in Bergmann glia; NA, no ISH data
