# Supplementary material for: Analogous mechanism regulating formation of neocortical basal radial glia and cerebellar Bergmann glia
Source: eLife. 2017 May 10;6:e23253. doi: 10.7554/eLife.23253 (PMC5457141; doi:10.7554/eLife.23253)
Supplement: Supplementary file 3. — (A) List of differentially expressed genes. Column A: gene symbol; Column B: human gene symbol; column C: ensembl gene ID; column D: description of gene name; Column E: fold changes on a logarithmic scale to base 2; Column F: the mean of normalized expression of all samples; Column G: moderated t-statistic; Column H: raw p-value; Column I: adjusted p-value; column J: log odds that the gene is differentially expressed; column K: key of pairwise comparison. DOI: http://dx.doi.org/10.7554/eLife.23253.026 [file elife-23253-supp3.xlsx]

## Sheet: ERK_responding genes
Symbol	hSymbol	Ensembl	description	logFC	AveExpr	t	P.Value	adj.P.Val	B	key
Fos	FOS	ENSMUST00000021674	FBJ osteosarcoma oncogene	3.17189	8.80788	16.4173	8.65142e-09	0.000149067	7.39381	ERK60min
Egr1	EGR1	ENSMUST00000064795	early growth response 1	3.39596	12.914	13.0152	8.7851e-08	0.000290725	6.33929	ERK60min
Tbx19	TBX19	ENSMUST00000027859	T-box 19	-0.970613	2.49704	-8.41613	5.71489e-06	0.0147909	3.75624	ERK60min
Klhl5	KLHL5	ENSMUST00000126692	kelch-like 5 (Drosophila)	-1.145	6.21003	-8.39801	5.82932e-06	0.0147909	3.74199	ERK60min
Kncn	KNCN		kinocilin	-1.50029	2.28198	-8.33348	6.2573e-06	0.0147909	3.6909	ERK60min
Hao2	HAO2	ENSMUST00000029464	hydroxyacid oxidase 2	-1.00555	2.35447	-7.35986	1.92204e-05	0.0407625	2.85338	ERK60min
Rsph3a	RSPH3		radial spoke 3A homolog (Chlamydomonas)	-1.24106	3.26703	-7.3134	2.03312e-05	0.0407625	2.8101	ERK60min
Ccr4	CCR4	ENSMUST00000054414	chemokine (C-C motif) receptor 4	-1.41102	3.96999	-7.28909	2.09399e-05	0.0407625	2.78733	ERK60min
Dock9	DOCK9		dedicator of cytokinesis 9	-1.12296	5.26765	-7.06598	2.75391e-05	0.0484569	2.57425	ERK60min
Egr2	EGR2	ENSMUST00000048289	early growth response 2	2.62108	5.96675	7.05778	2.7821e-05	0.0484569	2.56627	ERK60min
Gm5072	MAGEB6	ENSMUST00000063726	predicted gene 5072	-0.951177	2.37675	-7.00332	2.97735e-05	0.0492648	2.51305	ERK60min
Fos	FOS	ENSMUST00000021674	FBJ osteosarcoma oncogene	4.57997	8.80788	23.7053	2.05846e-10	4.18235e-06	11.0495	ERK120min
Egr1	EGR1	ENSMUST00000064795	early growth response 1	5.03361	12.914	19.2915	1.68927e-09	7.49018e-06	10.0839	ERK120min
Ptgs2	PTGS2	ENSMUST00000035065	prostaglandin-endoperoxide synthase 2	3.65237	5.81533	16.781	6.93661e-09	1.91294e-05	9.30813	ERK120min
Jun	JUN	ENSMUST00000058555	Jun oncogene	2.46701	11.4981	15.6223	1.4252e-08	3.62801e-05	8.87295	ERK120min
Zfp36	ZFP36	ENSMUST00000051241	zinc finger protein 36	2.16194	6.66498	15.358	1.69128e-08	3.99782e-05	8.76561	ERK120min
Arc	ARC		activity regulated cytoskeletal-associated protein	3.18425	12.9967	14.733	2.5633e-08	5.30171e-05	8.49874	ERK120min
Lor		ENSMUST00000058150	loricrin	4.05274	8.84472	14.0273	4.18171e-08	8.14031e-05	8.17363	ERK120min
Egr2	EGR2	ENSMUST00000048289	early growth response 2	4.63513	5.96675	12.481	1.3276e-07	0.000231233	7.36074	ERK120min
Phlda1	PHLDA1	ENSMUST00000020424	pleckstrin homology-like domain, family A, member 1	3.61273	10.9591	10.9739	4.65638e-07	0.000733779	6.40971	ERK120min
Tbx19	TBX19	ENSMUST00000027859	T-box 19	-1.18511	2.49704	-10.276	8.76017e-07	0.00126044	5.90607	ERK120min
Fosl1	FOSL1	ENSMUST00000025850	fos-like antigen 1	1.82616	7.33006	9.13602	2.66751e-06	0.00367816	4.98236	ERK120min
Junb	JUNB	ENSMUST00000064922	Jun-B oncogene	1.61292	7.56461	8.47277	5.37266e-06	0.0065585	4.37999	ERK120min
Plk3	PLK3	ENSMUST00000147730	polo-like kinase 3 (Drosophila)	1.18129	12.147	8.44309	5.54915e-06	0.0065585	4.35182	ERK120min
Efnb1	EFNB1		ephrin B1	-1.04259	8.39904	-8.35869	6.08613e-06	0.00694512	4.27113	ERK120min
Mamstr	MAMSTR	ENSMUST00000153706	MEF2 activating motif and SAP domain containing transcriptional regulator	-1.35405	2.95293	-8.28751	6.5829e-06	0.0072616	4.20238	ERK120min
Gm5072	MAGEB6	ENSMUST00000063726	predicted gene 5072	-1.10978	2.37675	-8.17106	7.49281e-06	0.0077941	4.08855	ERK120min
Hao2	HAO2	ENSMUST00000029464	hydroxyacid oxidase 2	-1.11507	2.35447	-8.16147	7.57362e-06	0.0077941	4.0791	ERK120min
Spry4	SPRY4		sprouty homolog 4 (Drosophila)	3.9616	9.23249	8.12238	7.91282e-06	0.0077941	4.04046	ERK120min
Slc26a2	SLC26A2	ENSMUST00000037603	solute carrier family 26 (sulfate transporter), member 2	1.59735	10.2737	8.10872	8.03516e-06	0.0077941	4.02691	ERK120min
G0s2	G0S2		G0/G1 switch gene 2	-1.54954	6.74903	-8.08601	8.24324e-06	0.0077941	4.00433	ERK120min
Nab2	NAB2	ENSMUST00000105248	Ngfi-A binding protein 2	1.97366	11.9678	8.03063	8.77534e-06	0.00806673	3.94899	ERK120min
Kncn	KNCN		kinocilin	-1.43525	2.28198	-7.97218	9.3775e-06	0.00830571	3.89016	ERK120min
Hic1	HIC1	ENSMUST00000055619	hypermethylated in cancer 1	1.4545	6.07006	7.95735	9.53727e-06	0.00830571	3.87516	ERK120min
Rsph3a	RSPH3		radial spoke 3A homolog (Chlamydomonas)	-1.34563	3.26703	-7.92965	9.84372e-06	0.00835277	3.84707	ERK120min
Arx	ARX	ENSMUST00000046565	aristaless related homeobox	-1.22334	2.46006	-7.86007	1.06614e-05	0.00882042	3.77607	ERK120min
Klhl5	KLHL5	ENSMUST00000126692	kelch-like 5 (Drosophila)	-1.05084	6.21003	-7.70737	1.27252e-05	0.0102711	3.61799	ERK120min
Adrb1	ADRB1		adrenergic receptor, beta 1	2.65883	5.51086	7.62456	1.40219e-05	0.0109441	3.53096	ERK120min
Tsc22d3	TSC22D3	ENSMUST00000112995	TSC22 domain family, member 3	-1.03264	8.07218	-7.51378	1.59848e-05	0.0118681	3.41306	ERK120min
Dusp4	DUSP4	ENSMUST00000033930	dual specificity phosphatase 4	3.23512	9.85271	7.50574	1.61383e-05	0.0118681	3.40444	ERK120min
Plaur	PLAUR	ENSMUST00000002284	plasminogen activator, urokinase receptor	1.52511	12.3949	7.31159	2.03757e-05	0.0143467	3.19351	ERK120min
Cyr61	CYR61	ENSMUST00000029846	cysteine rich protein 61	1.00113	9.16867	7.28954	2.09284e-05	0.0144288	3.16921	ERK120min
Rpe65	RPE65		retinal pigment epithelium 65	1.3111	4.4615	7.10599	2.62076e-05	0.0164876	2.96432	ERK120min
Kctd21	KCTD21	ENSMUST00000054107	potassium channel tetramerisation domain containing 21	-1.30394	6.15792	-7.08355	2.69458e-05	0.0164876	2.93893	ERK120min
2310035K24Rik		ENSMUST00000089506	RIKEN cDNA 2310035K24 gene	-1.0298	9.5038	-7.07267	2.73117e-05	0.0164876	2.9266	ERK120min
Fam43b	FAM43B		family with sequence similarity 43, member B	-1.57359	4.85114	-7.07	2.74021e-05	0.0164876	2.92358	ERK120min
Neurog3	NEUROG3	ENSMUST00000050103	neurogenin 3	-2.17222	9.36154	-7.01124	2.94806e-05	0.0167336	2.85665	ERK120min
Gm11346		ENSMUST00000135889	X-linked lymphocyte-regulated 5 pseudogene	-2.02799	3.98003	-6.99781	2.99791e-05	0.0167336	2.84128	ERK120min
Naglu	NAGLU	ENSMUST00000001802	alpha-N-acetylglucosaminidase (Sanfilippo disease IIIB)	-1.14164	6.02591	-6.93032	3.26258e-05	0.0176998	2.76365	ERK120min
Zfp14	ZFP14	ENSMUST00000077787	zinc finger protein 14	-1.30596	5.94486	-6.90719	3.35901e-05	0.0178286	2.73689	ERK120min
Flrt2	FLRT2		fibronectin leucine rich transmembrane protein 2	-1.97203	3.05193	-6.89895	3.39408e-05	0.0178286	2.72735	ERK120min
Tnfrsf12a	TNFRSF12A	ENSMUST00000024698	tumor necrosis factor receptor superfamily, member 12a	1.16492	12.182	6.87365	3.50432e-05	0.0181201	2.69795	ERK120min
Vgf	VGF	ENSMUST00000041543	VGF nerve growth factor inducible	1.93815	9.12273	6.81215	3.78861e-05	0.0189965	2.62611	ERK120min
Hbegf	HBEGF	ENSMUST00000025363	heparin-binding EGF-like growth factor	1.35	11.9754	6.73389	4.18689e-05	0.0200807	2.53387	ERK120min
1700001L19Rik	C5orf49		RIKEN cDNA 1700001L19 gene	-1.20461	5.79092	-6.63276	4.76958e-05	0.0225401	2.41332	ERK120min
Clec7a	CLEC7A	ENSMUST00000112076	C-type lectin domain family 7, member a	-2.49464	2.4321	-6.59478	5.01049e-05	0.0228113	2.36764	ERK120min
Zfp560	ZNF560		zinc finger protein 560	-1.59845	4.43978	-6.59149	5.03197e-05	0.0228113	2.36367	ERK120min
Ptger2	PTGER2	ENSMUST00000046891	prostaglandin E receptor 2 (subtype EP2)	2.19589	5.96191	6.52793	5.46685e-05	0.0244479	2.28671	ERK120min
Ppap2b	PPAP2B	ENSMUST00000064139	phosphatidic acid phosphatase type 2B	-1.28357	10.2767	-6.5112	5.5879e-05	0.0246225	2.26635	ERK120min
Acpp	ACPP	ENSMUST00000112590	acid phosphatase, prostate	2.05278	2.61589	6.47522	5.85819e-05	0.0250033	2.22241	ERK120min
Evx1	EVX1	ENSMUST00000031787	even skipped homeotic gene 1 homolog	1.78992	7.31514	6.46233	5.95843e-05	0.0250033	2.20662	ERK120min
Dusp2	DUSP2		dual specificity phosphatase 2	2.27335	8.63517	6.46101	5.96882e-05	0.0250033	2.205	ERK120min
Serpinb1b	SERPINB1	ENSMUST00000016951	serine (or cysteine) peptidase inhibitor, clade B, member 1b	1.94858	4.99674	6.42797	6.23469e-05	0.0254722	2.1644	ERK120min
Snai1	SNAI1	ENSMUST00000052631	snail homolog 1 (Drosophila)	-1.58092	7.83978	-6.39509	6.51202e-05	0.0260011	2.12383	ERK120min
9530004P13Rik			RIKEN cDNA 9530004P13 gene	-1.23346	3.64044	-6.38498	6.59986e-05	0.0260011	2.11133	ERK120min
Zfp36l1	ZFP36L1	ENSMUST00000021552	zinc finger protein 36, C3H type-like 1	1.50029	12.3247	6.36866	6.7445e-05	0.0261854	2.0911	ERK120min
Ntrk2	NTRK2		neurotrophic tyrosine kinase, receptor, type 2	-1.7006	2.45746	-6.35326	6.88403e-05	0.0261854	2.07199	ERK120min
Angpt4	ANGPT4	ENSMUST00000028955	angiopoietin 4	-2.11148	3.12289	-6.3437	6.97221e-05	0.0262195	2.0601	ERK120min
Hoxa1	HOXA1	ENSMUST00000000964	homeobox A1	1.2639	2.35963	6.29606	7.43024e-05	0.027628	2.00064	ERK120min
C87436	C2orf42	ENSMUST00000141972	expressed sequence C87436	-1.11102	8.57472	-6.22241	8.20305e-05	0.0293854	1.90802	ERK120min
Synpo	SYNPO	ENSMUST00000128528	synaptopodin	-1.06814	3.09397	-6.21745	8.25806e-05	0.0293854	1.90176	ERK120min
Cxcl12	CXCL12	ENSMUST00000112866	chemokine (C-X-C motif) ligand 12	-1.48323	3.54844	-6.19634	8.49689e-05	0.0299136	1.87503	ERK120min
Col15a1	COL15A1	ENSMUST00000102917	collagen, type XV, alpha 1	-1.317	2.95015	-6.16372	8.88057e-05	0.0306439	1.83361	ERK120min
Cebpd	CEBPD		CCAAT/enhancer binding protein (C/EBP), delta	1.40439	11.1158	6.15826	8.9467e-05	0.0306439	1.82665	ERK120min
4933404G15Rik			RIKEN cDNA 4933404G15 gene	-1.34051	2.42447	-6.14202	9.14618e-05	0.0306439	1.80595	ERK120min
Slc18a2	SLC18A2	ENSMUST00000086765	solute carrier family 18 (vesicular monoamine), member 2	-1.00309	2.34072	-6.1083	9.5758e-05	0.0308896	1.76283	ERK120min
Plekhg6	PLEKHG6	ENSMUST00000042647	pleckstrin homology domain containing, family G (with RhoGef domain) member 6	-1.26505	8.10702	-6.08392	9.89994e-05	0.0308896	1.73154	ERK120min
Dusp6	DUSP6	ENSMUST00000020118	dual specificity phosphatase 6	2.31727	13.1484	6.08143	9.93365e-05	0.0308896	1.72834	ERK120min
Defa-ps13			defensin, alpha, pseudogene 13	1.15422	2.1764	6.0738	0.000100379	0.0308896	1.71853	ERK120min
Myc	MYC		myelocytomatosis oncogene	2.40211	10.8842	6.06417	0.000101712	0.0308896	1.70612	ERK120min
Cend1	CEND1		cell cycle exit and neuronal differentiation 1	-1.21434	4.68153	-6.05917	0.00010241	0.0308896	1.69969	ERK120min
Gkn2	GKN2		gastrokine 2	1.62014	2.70182	6.02085	0.000107942	0.0308896	1.65017	ERK120min
Gm10778			predicted gene 10778	-1.03923	6.64307	-6.0166	0.000108576	0.0308896	1.64465	ERK120min
Ralyl	RALYL	ENSMUST00000108372	RALY RNA binding protein-like	-1.59162	2.77067	-5.99551	0.000111776	0.0313474	1.61729	ERK120min
Nefm	NEFM		neurofilament, medium polypeptide	1.70981	4.82573	5.96113	0.000117213	0.0321981	1.57252	ERK120min
Nfib	NFIB	ENSMUST00000064785	nuclear factor I/B	1.5151	2.6983	5.95309	0.000118525	0.0321981	1.56202	ERK120min
Id3	ID3	ENSMUST00000151001	inhibitor of DNA binding 3	2.21869	11.4628	5.91134	0.000125594	0.0332502	1.50735	ERK120min
Rasl11a	RASL11A	ENSMUST00000031646	RAS-like, family 11, member A	1.15865	6.02675	5.85542	0.000135778	0.0351039	1.43369	ERK120min
Insm2	INSM2		insulinoma-associated 2	2.61224	3.50294	5.84353	0.000138057	0.0354163	1.41796	ERK120min
Pdgfra	PDGFRA	ENSMUST00000000476	platelet derived growth factor receptor, alpha polypeptide	-1.6632	3.01699	-5.80987	0.000144728	0.0368423	1.37331	ERK120min
Plekhh2	PLEKHH2	ENSMUST00000047206	pleckstrin homology domain containing, family H (with MyTH4 domain) member 2	1.17792	2.36509	5.76256	0.000154696	0.0388236	1.31024	ERK120min
Wnt3	WNT3	ENSMUST00000000127	wingless-related MMTV integration site 3	-1.61333	3.54329	-5.76182	0.000154858	0.0388236	1.30925	ERK120min
Obox6			oocyte specific homeobox 6	-1.08504	5.18989	-5.74007	0.000159689	0.0397338	1.28014	ERK120min
Nhlrc4	NHLRC4	ENSMUST00000085027	NHL repeat containing 4	-1.92869	3.3678	-5.72601	0.000162897	0.0399376	1.26129	ERK120min
Nsun3	NSUN3		NOL1/NOP2/Sun domain family member 3	1.85309	3.27305	5.69946	0.000169147	0.0400459	1.22558	ERK120min
Kcng1	KCNG1	ENSMUST00000099069	potassium voltage-gated channel, subfamily G, member 1	-1.65079	4.7035	-5.65391	0.000180476	0.0414593	1.16405	ERK120min
Fjx1	FJX1		four jointed box 1 (Drosophila)	1.24394	9.91384	5.65223	0.000180908	0.0414593	1.16178	ERK120min
Id2	ID2	ENSMUST00000020974	inhibitor of DNA binding 2	-1.26325	11.0025	-5.64591	0.000182547	0.0414593	1.15321	ERK120min
Fgf2	FGF2	ENSMUST00000038885	fibroblast growth factor 2	-1.79769	2.97421	-5.64452	0.00018291	0.0414593	1.15132	ERK120min
Ccrn4l	CCRN4L	ENSMUST00000023849	CCR4 carbon catabolite repression 4-like (S. cerevisiae)	1.34667	13.3718	5.62409	0.000188327	0.0418231	1.1236	ERK120min
Pik3ip1	PIK3IP1		phosphoinositide-3-kinase interacting protein 1	-1.20119	9.0017	-5.61949	0.000189571	0.0418231	1.11734	ERK120min
Lfng	LFNG		LFNG O-fucosylpeptide 3-beta-N-acetylglucosaminyltransferase	-1.24469	6.04211	-5.59285	0.000196948	0.042588	1.08105	ERK120min
Tmem139	TMEM139	ENSMUST00000095987	transmembrane protein 139	-1.11885	6.35377	-5.58701	0.000198605	0.042588	1.07308	ERK120min
Dmrt2	DMRT2		doublesex and mab-3 related transcription factor 2	-1.43743	3.22966	-5.53932	0.000212714	0.0441402	1.00779	ERK120min
Nrp2	NRP2	ENSMUST00000027112	neuropilin 2	1.67319	8.281	5.51455	0.00022046	0.0442058	0.973731	ERK120min
Ascl2	ASCL2	ENSMUST00000121862	achaete-scute complex homolog 2 (Drosophila)	-1.31679	10.0697	-5.50947	0.000222084	0.0442058	0.966742	ERK120min
Zfp287	ZNF287	ENSMUST00000108706	zinc finger protein 287	-1.01133	6.66237	-5.50075	0.000224907	0.0442058	0.954708	ERK120min
Maff	MAFF	ENSMUST00000096350	v-maf musculoaponeurotic fibrosarcoma oncogene family, protein F (avian)	1.07258	9.9139	5.43356	0.000247962	0.045704	0.861683	ERK120min
Olfr381	OR1E1		olfactory receptor 381	-1.36514	2.24141	-5.42324	0.000251723	0.0457917	0.847318	ERK120min
Enc1	ENC1	ENSMUST00000041623	ectodermal-neural cortex 1	1.13321	12.6657	5.42292	0.000251839	0.0457917	0.846881	ERK120min
Ugt3a2	UGT3A1	ENSMUST00000058565	UDP glycosyltransferases 3 family, polypeptide A2	-1.10584	2.53305	-5.4059	0.000258175	0.0458032	0.82317	ERK120min
Chn2	CHN2	ENSMUST00000114403	chimerin (chimaerin) 2	-1.4764	2.94391	-5.40019	0.000260341	0.0458032	0.815195	ERK120min
Tnc	TNC	ENSMUST00000107371	tenascin C	-1.10921	2.32907	-5.38963	0.000264392	0.0458032	0.800455	ERK120min
LOC100504389			hypothetical LOC100504389	-1.37013	2.61079	-5.34517	0.000282206	0.0469299	0.738179	ERK120min
2210012G02Rik		ENSMUST00000057043	RIKEN cDNA 2210012G02 gene	-1.92626	2.60847	-5.31479	0.000295115	0.0482747	0.69543	ERK120min
Hes5	HES5	ENSMUST00000049621	hairy and enhancer of split 5 (Drosophila)	1.63083	6.3782	5.29852	0.000302282	0.0487972	0.672485	ERK120min
Zfp82	ZFP82		zinc finger protein 82	-1.02854	5.31153	-5.29411	0.000304258	0.0488778	0.666254	ERK120min
Fhl2	FHL2	ENSMUST00000008280	four and a half LIM domains 2	4.64325	8.10805	37.3554	1.88789e-12	6.24761e-08	18.0319	ERK240min
Itga3	ITGA3	ENSMUST00000073698	integrin alpha 3	4.70573	8.58671	33.0243	6.76029e-12	9.97742e-08	17.1257	ERK240min
4931407G18Rik			RIKEN cDNA 4931407G18 gene	-3.79948	7.54624	-32.1073	9.04489e-12	9.97742e-08	16.9082	ERK240min
Shisa6	SHISA6		shisa homolog 6 (Xenopus laevis)	6.57733	2.93505	30.6441	1.46449e-11	1.21161e-07	16.5399	ERK240min
S100a6	S100A6	ENSMUST00000001051	S100 calcium binding protein A6 (calcyclin)	3.53002	14.1558	28.7361	2.84309e-11	1.86253e-07	16.0165	ERK240min
Gsn	GSN	ENSMUST00000028239	gelsolin	3.19198	9.44659	28.2605	3.37691e-11	1.86253e-07	15.8777	ERK240min
Arntl2	ARNTL2	ENSMUST00000111639	aryl hydrocarbon receptor nuclear translocator-like 2	3.65846	8.46427	27.8403	3.94072e-11	1.863e-07	15.7522	ERK240min
Pla2g7	PLA2G7		phospholipase A2, group VII (platelet-activating factor acetylhydrolase, plasma)	4.10042	11.0069	26.0199	7.90552e-11	2.9529e-07	15.1748	ERK240min
Npcd	NPTXR	ENSMUST00000023057	neuronal pentraxin chromo domain	3.70654	9.72807	25.7154	8.92303e-11	2.9529e-07	15.0725	ERK240min
Cabp4	CABP4	ENSMUST00000025761	calcium binding protein 4	-4.57272	6.53343	-25.2143	1.09237e-10	3.01249e-07	14.9004	ERK240min
Fut4	FUT4		fucosyltransferase 4	4.63712	3.49554	23.9077	1.88654e-10	4.80241e-07	14.4284	ERK240min
Zfp36	ZFP36	ENSMUST00000051241	zinc finger protein 36	3.30075	6.66498	23.4478	2.3024e-10	5.44238e-07	14.2538	ERK240min
Cib2	CIB2		calcium and integrin binding family member 2	3.17182	9.80358	23.1263	2.65248e-10	5.57602e-07	14.1289	ERK240min
Klk1b5	KLK1		kallikrein 1-related peptidase b5	-4.47857	9.87094	-22.6916	3.22164e-10	5.8568e-07	13.9564	ERK240min
2010002N04Rik			RIKEN cDNA 2010002N04 gene	3.24669	10.9215	22.5044	3.50688e-10	5.8568e-07	13.8807	ERK240min
Itga8	ITGA8	ENSMUST00000028106	integrin alpha 8	4.35454	7.13056	22.484	3.5396e-10	5.8568e-07	13.8724	ERK240min
Spp1	SPP1	ENSMUST00000112747	secreted phosphoprotein 1	-3.79678	12.4989	-22.3582	3.74878e-10	5.90754e-07	13.821	ERK240min
Mia1		ENSMUST00000127491	melanoma inhibitory activity 1	-2.80341	12.109	-22.1663	4.09455e-10	6.15914e-07	13.7419	ERK240min
Nos3	NOS3	ENSMUST00000030834	nitric oxide synthase 3, endothelial cell	4.26857	7.93801	22.0013	4.41993e-10	6.35951e-07	13.6732	ERK240min
Ptprn	PTPRN	ENSMUST00000027404	protein tyrosine phosphatase, receptor type, N	3.50014	7.40387	21.5454	5.47513e-10	7.54951e-07	13.4797	ERK240min
5730416F02Rik			RIKEN cDNA 5730416F02 gene	2.73455	9.14515	21.4169	5.82036e-10	7.70452e-07	13.4242	ERK240min
Klk1	KLK1		kallikrein 1	-4.14428	8.74925	-21.1711	6.54893e-10	8.02681e-07	13.3169	ERK240min
Bace2	BACE2	ENSMUST00000047275	beta-site APP-cleaving enzyme 2	5.39729	3.01657	21.0255	7.02692e-10	8.30506e-07	13.2526	ERK240min
Egfbp2			epidermal growth factor binding protein type B	-4.2422	9.38913	-20.8194	7.77045e-10	8.48437e-07	13.1605	ERK240min
Ppp2r5a	PPP2R5A	ENSMUST00000110885	protein phosphatase 2, regulatory subunit B (B56), alpha isoform	2.4877	12.8129	20.6929	8.26903e-10	8.48437e-07	13.1034	ERK240min
Spic	SPIC	ENSMUST00000133724	Spi-C transcription factor (Spi-1/PU.1 related)	-5.61746	8.72644	-20.6676	8.37291e-10	8.48437e-07	13.092	ERK240min
Scarf2	SCARF2		scavenger receptor class F, member 2	3.22505	7.13298	20.4933	9.12824e-10	8.48437e-07	13.0125	ERK240min
Tubb3	TUBB3	ENSMUST00000071134	tubulin, beta 3	-2.8274	11.511	-20.482	9.17974e-10	8.48437e-07	13.0073	ERK240min
Cpe	CPE		carboxypeptidase E	2.55015	11.2801	20.4162	9.48604e-10	8.48437e-07	12.9771	ERK240min
Krt18	KRT18	ENSMUST00000023803	keratin 18	2.53034	13.2822	20.2697	1.0209e-09	8.89071e-07	12.9092	ERK240min
Vgf	VGF	ENSMUST00000041543	VGF nerve growth factor inducible	5.66549	9.12273	19.9129	1.22343e-09	1.02063e-06	12.7415	ERK240min
Khdrbs1	KHDRBS1	ENSMUST00000129342	KH domain containing, RNA binding, signal transduction associated 1	5.03243	7.41799	19.8581	1.25822e-09	1.02063e-06	12.7155	ERK240min
Fgfr4	FGFR4	ENSMUST00000067171	fibroblast growth factor receptor 4	5.48925	8.5365	19.6017	1.43621e-09	1.07703e-06	12.5922	ERK240min
Mme	MME	ENSMUST00000107889	membrane metallo endopeptidase	-3.52055	9.57415	-19.542	1.48151e-09	1.07703e-06	12.5632	ERK240min
Cldn3	CLDN3	ENSMUST00000094245	claudin 3	2.48242	9.42232	19.5281	1.49229e-09	1.07703e-06	12.5564	ERK240min
Serpinb1a	SERPINB1	ENSMUST00000021833	serine (or cysteine) peptidase inhibitor, clade B, member 1a	-4.04053	9.33772	-19.5219	1.4971e-09	1.07703e-06	12.5534	ERK240min
Ankrd22	ANKRD22	ENSMUST00000025686	ankyrin repeat domain 22	3.93333	2.63699	19.4419	1.561e-09	1.09911e-06	12.5144	ERK240min
Ly6g6e			lymphocyte antigen 6 complex, locus G6E	-2.26789	12.7214	-19.2349	1.74052e-09	1.15198e-06	12.4124	ERK240min
Slc4a11	SLC4A11	ENSMUST00000099362	solute carrier family 4, sodium bicarbonate transporter-like, member 11	2.24864	11.8166	18.8394	2.14972e-09	1.36425e-06	12.2137	ERK240min
Dgkk	DGKK	ENSMUST00000067410	diacylglycerol kinase kappa	4.04574	5.42712	18.8093	2.18491e-09	1.36425e-06	12.1984	ERK240min
Klk1b3	KLK1		kallikrein 1-related peptidase b3	-4.52503	8.94967	-18.6653	2.3623e-09	1.40825e-06	12.1247	ERK240min
Dpysl3	DPYSL3	ENSMUST00000025379	dihydropyrimidinase-like 3	-3.17883	12.5023	-18.6222	2.41836e-09	1.40825e-06	12.1025	ERK240min
Mical1	MICAL1	ENSMUST00000019967	microtubule associated monoxygenase, calponin and LIM domain containing 1	-2.089	13.213	-18.6093	2.43553e-09	1.40825e-06	12.0958	ERK240min
Hck	HCK	ENSMUST00000003370	hemopoietic cell kinase	-3.42386	13.9267	-18.5897	2.46162e-09	1.40825e-06	12.0857	ERK240min
Gm7676		ENSMUST00000084055	interferon induced transmembrane protein 1 pseudogene	-2.65969	15.878	-18.5294	2.54415e-09	1.42701e-06	12.0545	ERK240min
St8sia4	ST8SIA4	ENSMUST00000043336	ST8 alpha-N-acetyl-neuraminide alpha-2,8-sialyltransferase 4	5.53302	5.4414	18.2168	3.02342e-09	1.6188e-06	11.8906	ERK240min
Mtmr11	MTMR11	ENSMUST00000147245	myotubularin related protein 11	3.50651	5.85234	18.2113	3.03283e-09	1.6188e-06	11.8876	ERK240min
Calcb	CALCB	ENSMUST00000032902	calcitonin-related polypeptide, beta	3.89236	2.71457	18.1304	3.17288e-09	1.66667e-06	11.8447	ERK240min
Krt5	KRT5	ENSMUST00000023709	keratin 5	3.5422	6.95971	18.0228	3.37012e-09	1.7158e-06	11.7872	ERK240min
Pga5	PGA3	ENSMUST00000025647	pepsinogen 5, group I	-5.22042	10.5244	-17.7603	3.90995e-09	1.88645e-06	11.6452	ERK240min
Vwa1	VWA1		von Willebrand factor A domain containing 1	3.68151	7.55496	17.7515	3.92966e-09	1.88645e-06	11.6404	ERK240min
Phlda1	PHLDA1	ENSMUST00000020424	pleckstrin homology-like domain, family A, member 1	5.83754	10.9591	17.7319	3.97399e-09	1.88645e-06	11.6296	ERK240min
Efnb1	EFNB1		ephrin B1	-2.2101	8.39904	-17.7189	4.00366e-09	1.88645e-06	11.6225	ERK240min
Acsm4	ACSM4		acyl-CoA synthetase medium-chain family member 4	-4.16096	6.31231	-17.6051	4.27329e-09	1.88645e-06	11.56	ERK240min
Klk1b4	KLK1		kallikrein 1-related pepidase b4	-3.12911	7.62122	-17.5898	4.31107e-09	1.88645e-06	11.5516	ERK240min
Lrig3	LRIG3	ENSMUST00000074807	leucine-rich repeats and immunoglobulin-like domains 3	-2.57839	12.5311	-17.5491	4.41333e-09	1.88645e-06	11.5291	ERK240min
Rassf6	RASSF6	ENSMUST00000031317	Ras association (RalGDS/AF-6) domain family member 6	2.42608	5.89855	17.5472	4.41819e-09	1.88645e-06	11.528	ERK240min
Hmga2	HMGA2	ENSMUST00000072777	high mobility group AT-hook 2	3.45912	10.4537	17.5464	4.42032e-09	1.88645e-06	11.5276	ERK240min
Mep1b	MEP1B		meprin 1 beta	-2.97562	9.52401	-17.541	4.43398e-09	1.88645e-06	11.5246	ERK240min
Krt7	KRT7	ENSMUST00000131069	keratin 7	2.66689	6.60941	17.5139	4.50393e-09	1.88645e-06	11.5096	ERK240min
Ncam1	NCAM1	ENSMUST00000114483	neural cell adhesion molecule 1	-3.74742	10.1075	-17.5073	4.52109e-09	1.88645e-06	11.5059	ERK240min
Zeb1	ZEB1	ENSMUST00000025081	zinc finger E-box binding homeobox 1	-3.562	7.75698	-17.5007	4.53838e-09	1.88645e-06	11.5023	ERK240min
Acoxl	ACOXL	ENSMUST00000110344	acyl-Coenzyme A oxidase-like	-3.25311	8.81819	-17.4923	4.56037e-09	1.88645e-06	11.4976	ERK240min
Fosl1	FOSL1	ENSMUST00000025850	fos-like antigen 1	3.48342	7.33006	17.4271	4.73615e-09	1.93498e-06	11.4613	ERK240min
Tppp3	TPPP3	ENSMUST00000014990	tubulin polymerization-promoting protein family member 3	-3.2148	9.29837	-17.3892	4.84149e-09	1.93893e-06	11.4401	ERK240min
Ptgs2	PTGS2	ENSMUST00000035065	prostaglandin-endoperoxide synthase 2	3.78309	5.81533	17.3816	4.86299e-09	1.93893e-06	11.4359	ERK240min
Kctd12b		ENSMUST00000039424	potassium channel tetramerisation domain containing 12b	-2.50547	6.65091	-17.3364	4.99266e-09	1.96693e-06	11.4105	ERK240min
Ifitm1	IFITM1	ENSMUST00000106042	interferon induced transmembrane protein 1	-2.59134	15.8851	-17.2961	5.11156e-09	1.99008e-06	11.3879	ERK240min
Psors1c2	PSORS1C2		psoriasis susceptibility 1 candidate 2 (human)	2.38996	9.05872	17.2127	5.36738e-09	2.059e-06	11.3408	ERK240min
Fzd2	FZD2	ENSMUST00000057893	frizzled homolog 2 (Drosophila)	-2.18266	9.57133	-17.1983	5.41301e-09	2.059e-06	11.3326	ERK240min
Xaf1	XAF1	ENSMUST00000094042	XIAP associated factor 1	-5.79657	7.86212	-16.9616	6.22646e-09	2.33078e-06	11.1974	ERK240min
Arap3	ARAP3	ENSMUST00000042944	ArfGAP with RhoGAP domain, ankyrin repeat and PH domain 3	2.85765	7.75877	16.9503	6.26837e-09	2.33078e-06	11.1909	ERK240min
Snai3	SNAI3	ENSMUST00000006762	snail homolog 3 (Drosophila)	3.03071	6.74122	16.8945	6.4804e-09	2.38284e-06	11.1587	ERK240min
Fam102b	FAM102B		family with sequence similarity 102, member B	2.18555	8.01391	16.7976	6.86796e-09	2.4976e-06	11.1025	ERK240min
Obox6			oocyte specific homeobox 6	-3.15454	5.18989	-16.6881	7.33604e-09	2.60905e-06	11.0385	ERK240min
Trf	TF	ENSMUST00000035158	transferrin	3.71427	9.87438	16.6197	7.64653e-09	2.60905e-06	10.9983	ERK240min
Afp	AFP		alpha fetoprotein	2.67712	2.53573	16.6103	7.6903e-09	2.60905e-06	10.9927	ERK240min
Ttyh1	TTYH1	ENSMUST00000079415	tweety homolog 1 (Drosophila)	-2.36626	9.2096	-16.5987	7.74466e-09	2.60905e-06	10.9859	ERK240min
Scin	SCIN	ENSMUST00000002640	scinderin	3.56453	6.3357	16.5957	7.75858e-09	2.60905e-06	10.9841	ERK240min
Tgfbr2	TGFBR2		transforming growth factor, beta receptor II	3.22986	6.93179	16.5822	7.82242e-09	2.60905e-06	10.9762	ERK240min
Tril	TRIL	ENSMUST00000127748	TLR4 interactor with leucine-rich repeats	4.00157	2.87291	16.5693	7.884e-09	2.60905e-06	10.9686	ERK240min
9330159F19Rik	KIAA0408		RIKEN cDNA 9330159F19 gene	4.16115	2.93443	16.5219	8.11508e-09	2.65894e-06	10.9405	ERK240min
Ube2ql1	UBE2QL1	ENSMUST00000065118	ubiquitin-conjugating enzyme E2Q family-like 1	2.5343	2.51359	16.4359	8.55344e-09	2.77509e-06	10.8893	ERK240min
Arl11	ARL11		ADP-ribosylation factor-like 11	3.05323	3.03511	16.3945	8.77365e-09	2.79174e-06	10.8645	ERK240min
Gpnmb	GPNMB		glycoprotein (transmembrane) nmb	3.19543	5.47281	16.3908	8.79322e-09	2.79174e-06	10.8623	ERK240min
2200002D01Rik		ENSMUST00000151339	RIKEN cDNA 2200002D01 gene	2.25815	10.3816	16.3789	8.85786e-09	2.79174e-06	10.8552	ERK240min
Cebpd	CEBPD		CCAAT/enhancer binding protein (C/EBP), delta	3.73117	11.1158	16.3612	8.95513e-09	2.79577e-06	10.8446	ERK240min
Ermp1	ERMP1	ENSMUST00000054083	endoplasmic reticulum metallopeptidase 1	2.55431	11.5433	16.3315	9.12027e-09	2.82072e-06	10.8267	ERK240min
Klk1b26	KLK1	ENSMUST00000048945	kallikrein 1-related petidase b26	-4.9054	9.03237	-16.2981	9.31006e-09	2.85276e-06	10.8067	ERK240min
Hhip	HHIP	ENSMUST00000079038	Hedgehog-interacting protein	-5.60176	7.76535	-16.2652	9.50138e-09	2.88467e-06	10.7868	ERK240min
Kdr	KDR	ENSMUST00000113516	kinase insert domain protein receptor	3.27121	6.39451	16.243	9.63293e-09	2.89802e-06	10.7734	ERK240min
Btbd17	BTBD17	ENSMUST00000156053	BTB (POZ) domain containing 17	4.78858	6.39632	16.1248	1.03679e-08	3.09104e-06	10.7016	ERK240min
Tmem206	TMEM206		transmembrane protein 206	2.42555	11.292	16.1041	1.05026e-08	3.10325e-06	10.689	ERK240min
Bin1	BIN1	ENSMUST00000025239	bridging integrator 1	3.37249	10.196	16.0614	1.07872e-08	3.15911e-06	10.6628	ERK240min
Mras	MRAS	ENSMUST00000119472	muscle and microspikes RAS	-2.32898	12.1731	-16.0419	1.09196e-08	3.16983e-06	10.6509	ERK240min
Dmkn	DMKN		dermokine	1.96365	8.2488	16.0032	1.11882e-08	3.19687e-06	10.6271	ERK240min
Bcl2l15	BCL2L15		BCLl2-like 15	3.49871	5.90943	16.0007	1.12059e-08	3.19687e-06	10.6256	ERK240min
Runx1	RUNX1		runt related transcription factor 1	3.44675	6.02847	15.9429	1.16212e-08	3.25916e-06	10.5899	ERK240min
Nrp2	NRP2		neuropilin 2	4.12148	12.1517	15.8911	1.20079e-08	3.3393e-06	10.5579	ERK240min
Myo18b	MYO18B		myosin XVIIIb	-3.7639	7.51495	-15.8247	1.25235e-08	3.42512e-06	10.5166	ERK240min
B930095G15Rik			RIKEN cDNA B930095G15 gene	2.22513	2.38572	15.7762	1.29158e-08	3.48545e-06	10.4864	ERK240min
Nfatc4	NFATC4	ENSMUST00000024179	nuclear factor of activated T-cells, cytoplasmic, calcineurin-dependent 4	-2.71474	10.672	-15.7661	1.29993e-08	3.48545e-06	10.48	ERK240min
Wisp1	WISP1		WNT1 inducible signaling pathway protein 1	-2.7265	5.64331	-15.751	1.31247e-08	3.48545e-06	10.4706	ERK240min
Ebi3	EBI3	ENSMUST00000003274	Epstein-Barr virus induced gene 3	-2.67497	9.25723	-15.7462	1.31653e-08	3.48545e-06	10.4676	ERK240min
Lrrc15	LRRC15	ENSMUST00000064606	leucine rich repeat containing 15	-6.09007	7.90937	-15.7106	1.34681e-08	3.53729e-06	10.4453	ERK240min
Hand1	HAND1	ENSMUST00000036917	heart and neural crest derivatives expressed transcript 1	4.37772	5.39496	15.669	1.38315e-08	3.60413e-06	10.4191	ERK240min
Ppp1r14a	PPP1R14A	ENSMUST00000048187	protein phosphatase 1, regulatory (inhibitor) subunit 14A	-2.4244	10.996	-15.6554	1.39523e-08	3.6072e-06	10.4105	ERK240min
Mmp9	MMP9	ENSMUST00000017881	matrix metallopeptidase 9	4.73912	4.38493	15.5767	1.46761e-08	3.7612e-06	10.3608	ERK240min
Galr1	GALR1		galanin receptor 1	3.71058	2.67983	15.5663	1.47752e-08	3.7612e-06	10.3542	ERK240min
Skor1	SKOR1		SKI family transcriptional corepressor 1	3.92135	7.1442	15.5538	1.48947e-08	3.76266e-06	10.3463	ERK240min
2610528J11Rik	C1orf210		RIKEN cDNA 2610528J11 gene	3.44781	8.34801	15.5076	1.53461e-08	3.78991e-06	10.3169	ERK240min
Itpka	ITPKA		inositol 1,4,5-trisphosphate 3-kinase A	-1.93502	12.3849	-15.4405	1.60279e-08	3.92898e-06	10.2741	ERK240min
Neurog3	NEUROG3	ENSMUST00000050103	neurogenin 3	-4.76431	9.36154	-15.3777	1.66968e-08	4.00499e-06	10.2337	ERK240min
Pde2a	PDE2A		phosphodiesterase 2A, cGMP-stimulated	3.3408	10.4489	15.3773	1.67011e-08	4.00499e-06	10.2335	ERK240min
Akr1b8	AKR1B10		aldo-keto reductase family 1, member B8	3.65369	12.0877	15.3403	1.7109e-08	4.01097e-06	10.2097	ERK240min
E030010A14Rik			RIKEN cDNA E030010A14 gene	2.08708	2.37766	15.3351	1.71681e-08	4.01097e-06	10.2063	ERK240min
Lefty2	LEFTY2		left-right determination factor 2	-4.89317	13.3741	-15.324	1.7293e-08	4.01097e-06	10.1991	ERK240min
Pcolce2	PCOLCE2		procollagen C-endopeptidase enhancer 2	-2.14366	12.1746	-15.3134	1.7413e-08	4.01097e-06	10.1923	ERK240min
Dmgdh	DMGDH	ENSMUST00000048001	dimethylglycine dehydrogenase precursor	-1.6131	7.05434	-15.2771	1.7832e-08	4.06975e-06	10.1688	ERK240min
Vsig10	VSIG10	ENSMUST00000147182	V-set and immunoglobulin domain containing 10	1.9655	9.27118	15.2613	1.80187e-08	4.08419e-06	10.1586	ERK240min
Mfsd2a	MFSD2A	ENSMUST00000030408	major facilitator superfamily domain containing 2A	3.25313	5.90375	15.1802	1.90066e-08	4.23168e-06	10.1058	ERK240min
Perp	PERP	ENSMUST00000019998	PERP, TP53 apoptosis effector	2.35743	11.7929	15.1793	1.90172e-08	4.23168e-06	10.1053	ERK240min
Cd24a	CD24	ENSMUST00000058714	CD24a antigen	-2.8872	11.5874	-15.1765	1.9053e-08	4.23168e-06	10.1034	ERK240min
Dlgap3	DLGAP3	ENSMUST00000106094	discs, large (Drosophila) homolog-associated protein 3	-3.62561	13.2828	-15.1602	1.92589e-08	4.23231e-06	10.0928	ERK240min
Cdh2	CDH2	ENSMUST00000025166	cadherin 2	2.60894	8.98123	15.156	1.93116e-08	4.23231e-06	10.0901	ERK240min
Ms4a10	MS4A10	ENSMUST00000072748	membrane-spanning 4-domains, subfamily A, member 10	-2.16808	9.01744	-15.136	1.95687e-08	4.26044e-06	10.077	ERK240min
Igfbp6	IGFBP6		insulin-like growth factor binding protein 6	3.06232	7.01356	15.1037	1.99924e-08	4.32424e-06	10.0558	ERK240min
Ptpn22	PTPN22	ENSMUST00000146071	protein tyrosine phosphatase, non-receptor type 22 (lymphoid)	2.81629	2.48193	15.0719	2.04188e-08	4.35324e-06	10.035	ERK240min
Emp3	EMP3		epithelial membrane protein 3	2.56239	7.79041	15.0649	2.05136e-08	4.35324e-06	10.0304	ERK240min
Klk1b24	KLK1	ENSMUST00000073713	kallikrein 1-related peptidase b24	-2.92163	7.94999	-15.0644	2.05211e-08	4.35324e-06	10.03	ERK240min
Bcl2l14	BCL2L14	ENSMUST00000111960	BCL2-like 14 (apoptosis facilitator)	1.99289	9.49365	15.0419	2.08298e-08	4.39057e-06	10.0152	ERK240min
Jam2	JAM2	ENSMUST00000057513	junction adhesion molecule 2	-3.63516	13.6886	-15.0207	2.1126e-08	4.42482e-06	10.0013	ERK240min
Capg	CAPG	ENSMUST00000114073	capping protein (actin filament), gelsolin-like	2.33939	13.1658	15.0092	2.1288e-08	4.43073e-06	9.99368	ERK240min
Cdc42ep1	CDC42EP1	ENSMUST00000059619	CDC42 effector protein (Rho GTPase binding) 1	4.30339	7.88554	14.9923	2.15296e-08	4.453e-06	9.98251	ERK240min
Csrnp1	CSRNP1	ENSMUST00000035101	cysteine-serine-rich nuclear protein 1	2.02216	12.5273	14.9606	2.19902e-08	4.52002e-06	9.96154	ERK240min
Plk3	PLK3	ENSMUST00000147730	polo-like kinase 3 (Drosophila)	2.08817	12.147	14.9249	2.25223e-08	4.55826e-06	9.93784	ERK240min
Shank3	SHANK3		SH3/ankyrin domain gene 3	2.56739	8.7859	14.8634	2.34721e-08	4.69934e-06	9.89688	ERK240min
Lamb3	LAMB3	ENSMUST00000085541	laminin, beta 3	-3.84749	7.44257	-14.8419	2.38153e-08	4.71928e-06	9.88248	ERK240min
Msx1	MSX1	ENSMUST00000063116	homeobox, msh-like 1	2.05478	7.82706	14.8124	2.42934e-08	4.78536e-06	9.86276	ERK240min
Gm9376			predicted gene 9376	-3.26667	8.88252	-14.7666	2.50569e-08	4.85468e-06	9.83204	ERK240min
Trib1	TRIB1	ENSMUST00000067543	tribbles homolog 1 (Drosophila)	2.96877	9.79354	14.7575	2.52118e-08	4.85468e-06	9.82592	ERK240min
Car2	CA2		carbonic anhydrase 2	2.12253	11.9579	14.6644	2.68579e-08	5.0789e-06	9.76307	ERK240min
Aldh1a3	ALDH1A3	ENSMUST00000015278	aldehyde dehydrogenase family 1, subfamily A3	8.18563	5.70465	14.6269	2.75528e-08	5.12328e-06	9.73767	ERK240min
Pik3cd	PIK3CD		phosphatidylinositol 3-kinase catalytic delta polypeptide	2.08252	7.8235	14.6185	2.77118e-08	5.12328e-06	9.73195	ERK240min
Ptpn5	PTPN5	ENSMUST00000102626	protein tyrosine phosphatase, non-receptor type 5	3.64493	2.68587	14.5305	2.94325e-08	5.31372e-06	9.672	ERK240min
Ptprb	PTPRB	ENSMUST00000092167	protein tyrosine phosphatase, receptor type, B	2.87668	4.99306	14.5171	2.97044e-08	5.31372e-06	9.66284	ERK240min
Lama1	LAMA1	ENSMUST00000035471	laminin, alpha 1	-1.72169	13.5724	-14.5092	2.98659e-08	5.31372e-06	9.65745	ERK240min
Odz4		ENSMUST00000084996	odd Oz/ten-m homolog 4 (Drosophila)	-2.21152	13.0592	-14.4823	3.04241e-08	5.37193e-06	9.639	ERK240min
2900011O08Rik	C16orf45	ENSMUST00000056521	RIKEN cDNA 2900011O08 gene	-2.73486	8.37324	-14.4714	3.06548e-08	5.37193e-06	9.63148	ERK240min
D630045M09Rik			RIKEN cDNA D630045M09 gene	-3.18948	10.4393	-14.4702	3.06801e-08	5.37193e-06	9.63066	ERK240min
Bcl2l11	BCL2L11	ENSMUST00000103211	BCL2-like 11 (apoptosis facilitator)	2.24884	7.98933	14.4519	3.10691e-08	5.38309e-06	9.6181	ERK240min
Gm10394			predicted gene 10394	-3.4725	8.56148	-14.4403	3.13195e-08	5.3982e-06	9.6101	ERK240min
Hlf	HLF	ENSMUST00000043658	hepatic leukemia factor	-2.63103	7.01192	-14.4206	3.17491e-08	5.42593e-06	9.59652	ERK240min
Gm1679			predicted gene 1679	-3.12335	7.47265	-14.3674	3.29407e-08	5.56176e-06	9.55979	ERK240min
Fndc1	FNDC1		fibronectin type III domain containing 1	4.98648	4.35565	14.3572	3.31739e-08	5.57271e-06	9.55275	ERK240min
Capn2	CAPN2	ENSMUST00000111003	calpain 2	4.1858	10.8273	14.3246	3.39344e-08	5.67168e-06	9.53014	ERK240min
Morc4	MORC4	ENSMUST00000033811	microrchidia 4	2.11087	8.59196	14.2703	3.5244e-08	5.84491e-06	9.49234	ERK240min
Iqsec1	IQSEC1	ENSMUST00000043863	IQ motif and Sec7 domain 1	1.7573	9.81825	14.2532	3.5667e-08	5.84491e-06	9.48043	ERK240min
Fjx1	FJX1		four jointed box 1 (Drosophila)	3.13537	9.91384	14.2465	3.58362e-08	5.84491e-06	9.4757	ERK240min
Rnf128	RNF128	ENSMUST00000113026	ring finger protein 128	2.99141	11.4113	14.2363	3.60914e-08	5.84491e-06	9.46861	ERK240min
Mitf	MITF		microphthalmia-associated transcription factor	-2.19425	10.3455	-14.2213	3.64739e-08	5.85937e-06	9.45808	ERK240min
Fbxo15	FBXO15		F-box protein 15	-2.89163	14.368	-14.2027	3.69506e-08	5.90728e-06	9.44511	ERK240min
Peg10	PEG10		paternally expressed 10	2.14884	6.96146	14.173	3.7729e-08	5.94359e-06	9.42428	ERK240min
Dio3	DIO3		deiodinase, iodothyronine type III	-4.13104	6.32509	-14.1716	3.77682e-08	5.94359e-06	9.42324	ERK240min
Pmaip1	PMAIP1	ENSMUST00000025399	phorbol-12-myristate-13-acetate-induced protein 1	3.43702	10.59	14.1619	3.80239e-08	5.94359e-06	9.41649	ERK240min
Nccrp1	NCCRP1		non-specific cytotoxic cell receptor protein 1 homolog (zebrafish)	2.08882	9.84355	14.16	3.80758e-08	5.94359e-06	9.41513	ERK240min
Prmt8	PRMT8	ENSMUST00000032500	protein arginine N-methyltransferase 8	-2.86837	6.09018	-14.1341	3.87772e-08	6.02467e-06	9.39688	ERK240min
Tshz1	TSHZ1	ENSMUST00000060303	teashirt zinc finger family member 1	2.88473	7.26407	14.1065	3.95396e-08	6.05199e-06	9.37741	ERK240min
Slc26a2	SLC26A2	ENSMUST00000037603	solute carrier family 26 (sulfate transporter), member 2	2.77807	10.2737	14.1025	3.96504e-08	6.05199e-06	9.37461	ERK240min
Nrip1	NRIP1	ENSMUST00000054178	nuclear receptor interacting protein 1	1.72749	8.1504	14.0968	3.98088e-08	6.05199e-06	9.37063	ERK240min
Hspb2	HSPB2	ENSMUST00000042790	heat shock protein 2	1.93457	9.44116	14.0948	3.98675e-08	6.05199e-06	9.36915	ERK240min
Krt19	KRT19	ENSMUST00000126460	keratin 19	3.06146	9.7265	14.0708	4.05483e-08	6.09938e-06	9.35221	ERK240min
Car13	CA13		carbonic anhydrase 13	-1.72308	9.51823	-14.0626	4.07828e-08	6.1069e-06	9.34644	ERK240min
Mfap3l	MFAP3L	ENSMUST00000034066	microfibrillar-associated protein 3-like	3.64357	4.28142	14.0388	4.14775e-08	6.1564e-06	9.32954	ERK240min
Plaur	PLAUR	ENSMUST00000002284	plasminogen activator, urokinase receptor	2.92658	12.3949	14.0305	4.17228e-08	6.16399e-06	9.32363	ERK240min
Fam36a		ENSMUST00000027781	family with sequence similarity 36, member A	-1.63258	11.4944	-13.9963	4.27464e-08	6.25933e-06	9.29937	ERK240min
Wwc2	WWC2		WW, C2 and coiled-coil domain containing 2	-1.84136	12.6703	-13.9556	4.40041e-08	6.4151e-06	9.27033	ERK240min
Rxrg	RXRG	ENSMUST00000015987	retinoid X receptor gamma	6.71991	6.78785	13.9451	4.43339e-08	6.42148e-06	9.26284	ERK240min
Plvap	PLVAP		plasmalemma vesicle associated protein	2.74502	8.48233	13.9419	4.4436e-08	6.42148e-06	9.26054	ERK240min
Dcaf12l1	DCAF12L1	ENSMUST00000060481	DDB1 and CUL4 associated factor 12-like 1	-1.74506	11.1633	-13.9314	4.47701e-08	6.44165e-06	9.25303	ERK240min
Pde1b	PDE1B	ENSMUST00000023132	phosphodiesterase 1B, Ca2+-calmodulin dependent	-2.20218	11.3769	-13.9007	4.57623e-08	6.5559e-06	9.23106	ERK240min
Cfp	CFP		complement factor properdin	-3.28952	11.2589	-13.8589	4.7151e-08	6.72572e-06	9.20109	ERK240min
Mctp2	MCTP2	ENSMUST00000079323	multiple C2 domains, transmembrane 2	2.20416	8.47189	13.8007	4.91648e-08	6.98289e-06	9.15914	ERK240min
AI854517			expressed sequence AI854517	-2.59675	7.02162	-13.7543	5.08392e-08	7.15733e-06	9.12553	ERK240min
Kdm3a	KDM3A	ENSMUST00000065509	lysine (K)-specific demethylase 3A	-1.81045	13.8245	-13.741	5.13274e-08	7.15733e-06	9.11593	ERK240min
Specc1	SPECC1	ENSMUST00000108709	sperm antigen with calponin homology and coiled-coil domains 1	1.70061	10.5562	13.7409	5.13337e-08	7.15733e-06	9.11581	ERK240min
Sh3gl3	SH3GL3	ENSMUST00000116299	SH3-domain GRB2-like 3	1.79714	10.8662	13.6749	5.38477e-08	7.36943e-06	9.06779	ERK240min
Klf8	KLF8		Kruppel-like factor 8	-2.65822	10.9675	-13.6693	5.40664e-08	7.36943e-06	9.06372	ERK240min
Tes	TES	ENSMUST00000115467	testis derived transcript	2.10949	10.335	13.6651	5.42316e-08	7.36943e-06	9.06065	ERK240min
Gjb4	GJB4		gap junction protein, beta 4	-3.49284	7.95756	-13.6566	5.45669e-08	7.36943e-06	9.05446	ERK240min
Egr1	EGR1	ENSMUST00000064795	early growth response 1	3.56308	12.914	13.6557	5.4602e-08	7.36943e-06	9.05381	ERK240min
Baalc	BAALC	ENSMUST00000022905	brain and acute leukemia, cytoplasmic	6.89851	4.0967	13.6512	5.47813e-08	7.36943e-06	9.05051	ERK240min
Crlf1	CRLF1	ENSMUST00000132648	cytokine receptor-like factor 1	5.87631	5.14493	13.6376	5.53266e-08	7.41265e-06	9.04056	ERK240min
Lamc2	LAMC2	ENSMUST00000027753	laminin, gamma 2	1.59763	10.9427	13.6001	5.68567e-08	7.58693e-06	9.01314	ERK240min
Zyx	ZYX	ENSMUST00000031890	zyxin	2.29945	10.7573	13.5894	5.73022e-08	7.61568e-06	9.00529	ERK240min
Duox1	DUOX1	ENSMUST00000099461	dual oxidase 1	-2.05575	6.86512	-13.5669	5.8254e-08	7.67472e-06	8.98872	ERK240min
Sfn	SFN	ENSMUST00000057311	stratifin	2.21125	10.5475	13.5645	5.83561e-08	7.67472e-06	8.98696	ERK240min
Slc4a7	SLC4A7	ENSMUST00000090583	solute carrier family 4, sodium bicarbonate cotransporter, member 7	2.98703	11.0559	13.5133	6.05849e-08	7.89776e-06	8.94925	ERK240min
Lgals1	LGALS1	ENSMUST00000089377	lectin, galactose binding, soluble 1	1.70819	14.2946	13.5125	6.0618e-08	7.89776e-06	8.9487	ERK240min
Ggh	GGH	ENSMUST00000029904	gamma-glutamyl hydrolase	-1.61159	11.3546	-13.472	6.24511e-08	8.04013e-06	8.91871	ERK240min
Msc	MSC		musculin	-4.11256	8.04897	-13.4688	6.25971e-08	8.04013e-06	8.91636	ERK240min
Gdf3	GDF3	ENSMUST00000032211	growth differentiation factor 3	-1.47416	14.6991	-13.467	6.26805e-08	8.04013e-06	8.91502	ERK240min
Dync1i1	DYNC1I1		dynein cytoplasmic 1 intermediate chain 1	3.2304	7.13974	13.467	6.26826e-08	8.04013e-06	8.91498	ERK240min
Fos	FOS	ENSMUST00000021674	FBJ osteosarcoma oncogene	2.59961	8.80788	13.4553	6.3225e-08	8.0784e-06	8.90631	ERK240min
Rhobtb2	RHOBTB2	ENSMUST00000022665	Rho-related BTB domain containing 2	1.54941	10.1548	13.4314	6.43463e-08	8.17982e-06	8.8886	ERK240min
Sfrp1	SFRP1	ENSMUST00000033952	secreted frizzled-related protein 1	-5.76317	9.17904	-13.3444	6.86222e-08	8.60662e-06	8.82377	ERK240min
Gypc	GYPC		glycophorin C	2.68161	5.94231	13.3437	6.86595e-08	8.60662e-06	8.82322	ERK240min
Dusp2	DUSP2		dual specificity phosphatase 2	4.68903	8.63517	13.3265	6.95421e-08	8.68437e-06	8.81035	ERK240min
Ptpn9	PTPN9	ENSMUST00000034832	protein tyrosine phosphatase, non-receptor type 9	1.97861	6.11401	13.318	6.99805e-08	8.70626e-06	8.80401	ERK240min
Fam26e	FAM26E		family with sequence similarity 26, member E	-2.9318	5.97381	-13.2963	7.11212e-08	8.78521e-06	8.7877	ERK240min
Cfc1	CFC1	ENSMUST00000027298	cripto, FRL-1, cryptic family 1	-6.26108	9.32236	-13.2857	7.1687e-08	8.81909e-06	8.77971	ERK240min
Mup20		ENSMUST00000074018	major urinary protein 20	-2.40554	7.68628	-13.2721	7.24149e-08	8.84833e-06	8.76952	ERK240min
Gm7455			predicted gene 7455	7.5014	5.00915	13.2713	7.24594e-08	8.84833e-06	8.7689	ERK240min
Tmem179	TMEM179		transmembrane protein 179	1.57012	9.31231	13.2607	7.30354e-08	8.85436e-06	8.76091	ERK240min
Clec1a	CLEC1A		C-type lectin domain family 1, member a	3.58656	2.42391	13.2605	7.30439e-08	8.85436e-06	8.76079	ERK240min
Mov10	MOV10	ENSMUST00000106774	Moloney leukemia virus 10	-2.23122	14.3943	-13.2457	7.38556e-08	8.92009e-06	8.74964	ERK240min
Fam83g	FAM83G		family with sequence similarity 83, member G	1.66456	8.49744	13.224	7.50629e-08	9.0105e-06	8.73328	ERK240min
Amotl1	AMOTL1	ENSMUST00000160770	angiomotin-like 1	1.85597	7.13728	13.1985	7.65083e-08	9.08201e-06	8.71403	ERK240min
Ubtd1	UBTD1		ubiquitin domain containing 1	1.77133	9.84349	13.1834	7.73789e-08	9.12803e-06	8.7026	ERK240min
1700003M02Rik	C6orf165	ENSMUST00000084732	RIKEN cDNA 1700003M02 gene	-3.09811	5.93102	-13.1812	7.75081e-08	9.12803e-06	8.70092	ERK240min
0610040J01Rik	C4orf19		RIKEN cDNA 0610040J01 gene	1.88788	7.77049	13.1659	7.84016e-08	9.19712e-06	8.68934	ERK240min
Wls	WLS	ENSMUST00000068952	wntless homolog (Drosophila)	-1.98137	7.25309	-13.157	7.89275e-08	9.19712e-06	8.68259	ERK240min
Gata6	GATA6	ENSMUST00000047762	GATA binding protein 6	4.46732	5.74569	13.157	7.89286e-08	9.19712e-06	8.68258	ERK240min
1700016D02Rik			RIKEN cDNA 1700016D02 gene	3.20918	5.48578	13.1435	7.97368e-08	9.2587e-06	8.67229	ERK240min
Cdk14	CDK14		cyclin-dependent kinase 14	2.1276	7.46386	13.1196	8.11842e-08	9.39381e-06	8.65411	ERK240min
Sbsn	SBSN		suprabasin	1.40149	9.26423	13.108	8.18975e-08	9.44332e-06	8.64527	ERK240min
Rab44	RAB44		RAB44, member RAS oncogene family	-2.85082	6.60161	-13.064	8.46611e-08	9.69443e-06	8.61173	ERK240min
Grm6	GRM6	ENSMUST00000126890	glutamate receptor, metabotropic 6	7.83254	5.02494	13.0561	8.51681e-08	9.71886e-06	8.60569	ERK240min
Btla	BTLA	ENSMUST00000102802	B and T lymphocyte associated	4.01141	2.77801	13.0506	8.55218e-08	9.72568e-06	8.6015	ERK240min
Gng12	GNG12		guanine nucleotide binding protein (G protein), gamma 12	1.73396	6.57052	13.046	8.5826e-08	9.72685e-06	8.59791	ERK240min
Oas1a	OAS1	ENSMUST00000086373	2'-5' oligoadenylate synthetase 1A	-3.00587	11.5781	-13.013	8.79981e-08	9.93898e-06	8.57264	ERK240min
Tmed5	TMED5	ENSMUST00000117759	transmembrane emp24 protein transport domain containing 5	1.9121	8.03571	13.0035	8.8635e-08	9.94612e-06	8.56535	ERK240min
Msrb2	MSRB2		methionine sulfoxide reductase B2	-2.73323	11.8856	-13.0031	8.86625e-08	9.94612e-06	8.56503	ERK240min
Smarcd3	SMARCD3	ENSMUST00000030791	SWI/SNF related, matrix associated, actin dependent regulator of chromatin, subfamily d, member 3	-3.73579	8.81381	-12.9676	9.10896e-08	1.01461e-05	8.53771	ERK240min
Dtx4	DTX4	ENSMUST00000045521	deltex 4 homolog (Drosophila)	1.63535	8.98646	12.9592	9.16712e-08	1.01461e-05	8.53127	ERK240min
Zbtb45	ZBTB45		zinc finger and BTB domain containing 45	-1.80952	11.3312	-12.9326	9.35452e-08	1.03165e-05	8.51079	ERK240min
S100a16	S100A16		S100 calcium binding protein A16	2.59024	9.55958	12.9286	9.38346e-08	1.03165e-05	8.50766	ERK240min
Iglon5	IGLON5	ENSMUST00000107974	IgLON family member 5	2.2941	8.73164	12.9221	9.43017e-08	1.03335e-05	8.50263	ERK240min
Klk11	KLK11		kallikrein related-peptidase 11	-2.06433	8.4086	-12.9113	9.50803e-08	1.03503e-05	8.49431	ERK240min
Mobp	MOBP	ENSMUST00000093773	myelin-associated oligodendrocytic basic protein	-3.09152	7.71568	-12.8984	9.60275e-08	1.0395e-05	8.48427	ERK240min
Prss39			protease, serine, 39	2.91195	2.39763	12.8971	9.61191e-08	1.0395e-05	8.48331	ERK240min
Cpsf4l	CPSF4L		cleavage and polyadenylation specific factor 4-like	-3.24553	11.8983	-12.8776	9.75683e-08	1.05173e-05	8.46815	ERK240min
Fgfr2	FGFR2	ENSMUST00000136264	fibroblast growth factor receptor 2	-2.9076	4.9467	-12.8625	9.87045e-08	1.06053e-05	8.45643	ERK240min
Edn2	EDN2	ENSMUST00000030384	endothelin 2	6.8744	6.17671	12.8176	1.02161e-07	1.09059e-05	8.42155	ERK240min
Acsl4	ACSL4	ENSMUST00000112907	acyl-CoA synthetase long-chain family member 4	1.95439	11.039	12.8043	1.03215e-07	1.09829e-05	8.41116	ERK240min
Dusp5	DUSP5	ENSMUST00000038287	dual specificity phosphatase 5	3.08524	6.2357	12.783	1.04923e-07	1.11068e-05	8.39452	ERK240min
Oas1c	OAS1		2'-5' oligoadenylate synthetase 1C	-3.13812	7.93333	-12.7779	1.05338e-07	1.11068e-05	8.39051	ERK240min
Crybg3	CRYBG3	ENSMUST00000129762	beta-gamma crystallin domain containing 3	2.06303	9.47684	12.7773	1.05386e-07	1.11068e-05	8.39005	ERK240min
Pld1	PLD1	ENSMUST00000067776	phospholipase D1	-3.36121	6.29897	-12.7405	1.08425e-07	1.13908e-05	8.36124	ERK240min
Fbrsl1	FBRSL1		fibrosin-like 1	-1.68469	10.107	-12.719	1.10247e-07	1.15091e-05	8.34433	ERK240min
Lmna	LMNA	ENSMUST00000036252	lamin A	2.10478	12.5729	12.7099	1.1102e-07	1.15415e-05	8.33724	ERK240min
Otud7a	OTUD7A	ENSMUST00000058476	OTU domain containing 7A	2.88114	4.46198	12.7072	1.11254e-07	1.15415e-05	8.33511	ERK240min
Grin2a	GRIN2A	ENSMUST00000115835	glutamate receptor, ionotropic, NMDA2A (epsilon 1)	2.12893	2.3471	12.6921	1.12562e-07	1.16407e-05	8.32325	ERK240min
Aldh1a2	ALDH1A2	ENSMUST00000034723	aldehyde dehydrogenase family 1, subfamily A2	-1.50262	8.7054	-12.6548	1.15878e-07	1.1916e-05	8.29379	ERK240min
Tmem178	TMEM178A		transmembrane protein 178	2.28528	5.08208	12.6251	1.1859e-07	1.21501e-05	8.27031	ERK240min
Gpr124	GPR124	ENSMUST00000033876	G protein-coupled receptor 124	3.53926	5.53335	12.6134	1.1967e-07	1.21853e-05	8.26111	ERK240min
Rhoc	RHOC	ENSMUST00000106787	ras homolog gene family, member C	2.24807	12.3196	12.6045	1.20505e-07	1.22327e-05	8.25405	ERK240min
Gm3161			predicted gene 3161	2.38313	7.31649	12.5996	1.20969e-07	1.22423e-05	8.25014	ERK240min
Kank2	KANK2		KN motif and ankyrin repeat domains 2	-2.21197	13.6912	-12.5882	1.22053e-07	1.23144e-05	8.24108	ERK240min
Cdkl2	CDKL2	ENSMUST00000086978	cyclin-dependent kinase-like 2 (CDC2-related kinase)	2.59597	8.66834	12.5552	1.25246e-07	1.25713e-05	8.21485	ERK240min
Chst7	CHST7	ENSMUST00000044138	carbohydrate (N-acetylglucosamino) sulfotransferase 7	3.07635	7.67534	12.554	1.25359e-07	1.25713e-05	8.21393	ERK240min
Map2k6	MAP2K6	ENSMUST00000020949	mitogen-activated protein kinase kinase 6	-2.79236	10.329	-12.5446	1.26293e-07	1.26267e-05	8.20639	ERK240min
Exoc3l	EXOC3L1		exocyst complex component 3-like	3.55405	9.6247	12.5224	1.28512e-07	1.28098e-05	8.1887	ERK240min
Myom2	MYOM2		myomesin 2	-4.54432	8.73092	-12.5084	1.29929e-07	1.29121e-05	8.17755	ERK240min
Serpinb6d	SERPINB6		serine (or cysteine) peptidase inhibitor, clade B, member 6d	-2.91022	9.85992	-12.4967	1.31135e-07	1.2993e-05	8.16816	ERK240min
Ereg	EREG	ENSMUST00000031324	epiregulin	3.34331	2.55484	12.4892	1.31903e-07	1.303e-05	8.16223	ERK240min
Vim	VIM	ENSMUST00000028062	vimentin	-2.20744	12.9343	-12.4427	1.36829e-07	1.34365e-05	8.12495	ERK240min
Itpk1	ITPK1	ENSMUST00000046518	inositol 1,3,4-triphosphate 5/6 kinase	1.98905	11.7665	12.4039	1.41091e-07	1.37855e-05	8.09375	ERK240min
Tagln3	TAGLN3		transgelin 3	-2.25675	9.16535	-12.4028	1.41217e-07	1.37855e-05	8.09284	ERK240min
Arntl	ARNTL	ENSMUST00000084703	aryl hydrocarbon receptor nuclear translocator-like	2.87988	10.5602	12.3909	1.42559e-07	1.38091e-05	8.08322	ERK240min
Meis2	MEIS2		Meis homeobox 2	-1.36437	6.95452	-12.3895	1.4271e-07	1.38091e-05	8.08214	ERK240min
Gm4606			predicted gene 4606	-2.49308	5.87589	-12.3558	1.46587e-07	1.40161e-05	8.05487	ERK240min
Epha8	EPHA8	ENSMUST00000030420	Eph receptor A8	3.92036	7.16193	12.3538	1.46821e-07	1.40161e-05	8.05325	ERK240min
Sqstm1	SQSTM1	ENSMUST00000147846	sequestosome 1	1.9771	12.0732	12.3525	1.46967e-07	1.40161e-05	8.05224	ERK240min
Runx1t1	RUNX1T1	ENSMUST00000098256	runt-related transcription factor 1; translocated to, 1 (cyclin D-related)	-3.55441	8.65831	-12.3377	1.48707e-07	1.41202e-05	8.04025	ERK240min
1700008O03Rik	C19orf81		RIKEN cDNA 1700008O03 gene	-1.46659	8.19222	-12.3338	1.49166e-07	1.41202e-05	8.03711	ERK240min
Gsx1	GSX1	ENSMUST00000065382	GS homeobox 1	4.58903	5.9765	12.3324	1.49339e-07	1.41202e-05	8.03594	ERK240min
Gm5622		ENSMUST00000111860	predicted gene 5622	1.89986	5.98904	12.3075	1.52327e-07	1.43617e-05	8.01577	ERK240min
Upp1	UPP1	ENSMUST00000020677	uridine phosphorylase 1	3.05084	5.21756	12.303	1.52878e-07	1.43727e-05	8.01209	ERK240min
Tpd52l1	TPD52L1	ENSMUST00000000305	tumor protein D52-like 1	1.67062	11.2309	12.2873	1.54803e-07	1.45125e-05	7.99935	ERK240min
Fmo5	FMO5	ENSMUST00000029729	flavin containing monooxygenase 5	-1.63182	6.63409	-12.2772	1.56059e-07	1.45888e-05	7.99112	ERK240min
Dusp4	DUSP4	ENSMUST00000033930	dual specificity phosphatase 4	5.28551	9.85271	12.2628	1.57864e-07	1.46281e-05	7.97941	ERK240min
Gstm3	GSTM4	ENSMUST00000004136	glutathione S-transferase, mu 3	-2.22504	10.3104	-12.2581	1.5846e-07	1.46281e-05	7.97557	ERK240min
Arhgap18	ARHGAP18	ENSMUST00000142284	Rho GTPase activating protein 18	3.41523	5.31238	12.2575	1.5854e-07	1.46281e-05	7.97506	ERK240min
Bmi1	COMMD3-BMI1	ENSMUST00000051929	Bmi1 polycomb ring finger oncogene	-1.42047	8.54956	-12.2549	1.58867e-07	1.46281e-05	7.97296	ERK240min
Ms4a14		ENSMUST00000067600	membrane-spanning 4-domains, subfamily A, member 14	-2.44147	6.54856	-12.2528	1.59131e-07	1.46281e-05	7.97126	ERK240min
Col7a1	COL7A1	ENSMUST00000026740	collagen, type VII, alpha 1	2.09075	8.37219	12.2112	1.64533e-07	1.50411e-05	7.93725	ERK240min
Lima1	LIMA1	ENSMUST00000073691	LIM domain and actin binding 1	-2.44852	9.58189	-12.1938	1.66846e-07	1.51697e-05	7.92303	ERK240min
Lrpap1	LRPAP1	ENSMUST00000135207	low density lipoprotein receptor-related protein associated protein 1	-2.7592	12.6399	-12.1937	1.66857e-07	1.51697e-05	7.92296	ERK240min
Cst3	CST3	ENSMUST00000028938	cystatin C	-2.37595	13.3938	-12.1861	1.6788e-07	1.52209e-05	7.91673	ERK240min
Dppa3	DPPA3	ENSMUST00000049644	developmental pluripotency-associated 3	-3.04133	11.1802	-12.1824	1.68383e-07	1.52249e-05	7.91368	ERK240min
Hoxa1	HOXA1	ENSMUST00000114436	homeobox A1	2.17509	6.57569	12.1759	1.69272e-07	1.52636e-05	7.90831	ERK240min
Loxl1	LOXL1	ENSMUST00000061799	lysyl oxidase-like 1	1.84136	6.83786	12.1669	1.70495e-07	1.53302e-05	7.90097	ERK240min
Plac1	PLAC1	ENSMUST00000074861	placental specific protein 1	2.83644	2.42638	12.1637	1.70937e-07	1.53302e-05	7.89833	ERK240min
Oas1f	OAS1		2'-5' oligoadenylate synthetase 1F	-2.94769	10.0742	-12.1111	1.78349e-07	1.5798e-05	7.85504	ERK240min
Kcnj16	KCNJ16	ENSMUST00000106635	potassium inwardly-rectifying channel, subfamily J, member 16	-3.42623	4.97337	-12.1102	1.78475e-07	1.5798e-05	7.85433	ERK240min
Amfr	AMFR	ENSMUST00000053766	autocrine motility factor receptor	1.84076	9.77817	12.1083	1.78753e-07	1.5798e-05	7.85274	ERK240min
Anxa1	ANXA1	ENSMUST00000025561	annexin A1	2.89653	10.0243	12.1065	1.79019e-07	1.5798e-05	7.85122	ERK240min
Steap1	STEAP1	ENSMUST00000015796	six transmembrane epithelial antigen of the prostate 1	2.0535	10.8001	12.0924	1.81074e-07	1.59098e-05	7.83958	ERK240min
Alpk3	ALPK3		alpha-kinase 3	-2.32666	8.24533	-12.0912	1.81246e-07	1.59098e-05	7.83861	ERK240min
Slc16a9	SLC16A9	ENSMUST00000046807	solute carrier family 16 (monocarboxylic acid transporters), member 9	-3.38716	7.27566	-12.0829	1.82473e-07	1.59598e-05	7.83173	ERK240min
Dpysl4	DPYSL4	ENSMUST00000121184	dihydropyrimidinase-like 4	-3.42659	10.1532	-12.0808	1.82781e-07	1.59598e-05	7.83	ERK240min
Pbx1	PBX1		pre B-cell leukemia transcription factor 1	-2.87423	7.35402	-12.0669	1.8485e-07	1.6098e-05	7.81852	ERK240min
Wsb2	WSB2	ENSMUST00000031309	WD repeat and SOCS box-containing 2	1.62749	12.034	12.0202	1.91997e-07	1.66766e-05	7.7798	ERK240min
Bche	BCHE	ENSMUST00000029367	butyrylcholinesterase	-2.04072	7.72217	-12.005	1.94401e-07	1.68411e-05	7.7671	ERK240min
Hopx	HOPX	ENSMUST00000113453	HOP homeobox	3.89141	9.16548	11.9775	1.98798e-07	1.71595e-05	7.74427	ERK240min
Calml4	CALML4		calmodulin-like 4	2.54385	9.72594	11.9756	1.99113e-07	1.71595e-05	7.74265	ERK240min
Fosl2	FOSL2		fos-like antigen 2	3.09529	5.83228	11.9714	1.99798e-07	1.71738e-05	7.73914	ERK240min
Nap1l3	NAP1L3		nucleosome assembly protein 1-like 3	-2.3318	4.95586	-11.9639	2.01029e-07	1.7183e-05	7.73287	ERK240min
Pla1a	PLA1A		phospholipase A1 member A	-2.16611	11.6734	-11.9616	2.01399e-07	1.7183e-05	7.73099	ERK240min
Gm13889	C11orf96	ENSMUST00000148314	predicted gene 13889	3.80024	8.43339	11.9612	2.01462e-07	1.7183e-05	7.73067	ERK240min
Cd163l1	CD163L1	ENSMUST00000026531	CD163 molecule-like 1	-2.05799	4.47003	-11.9568	2.02197e-07	1.72013e-05	7.72695	ERK240min
Gsx2	GSX2	ENSMUST00000040477	GS homeobox 2	-2.85951	5.04998	-11.9517	2.03041e-07	1.72288e-05	7.7227	ERK240min
Pkdcc	PKDCC	ENSMUST00000025094	protein kinase domain containing, cytoplasmic	3.84624	8.23465	11.9486	2.03561e-07	1.72288e-05	7.72008	ERK240min
Stard5	STARD5	ENSMUST00000075418	StAR-related lipid transfer (START) domain containing 5	1.74331	7.11701	11.9426	2.04559e-07	1.7269e-05	7.71509	ERK240min
Col5a3	COL5A3		collagen, type V, alpha 3	-2.24226	8.82206	-11.9305	2.06592e-07	1.73963e-05	7.70498	ERK240min
Gls	GLS	ENSMUST00000114513	glutaminase	1.6763	7.13659	11.8988	2.12039e-07	1.77646e-05	7.67839	ERK240min
Crabp2	CRABP2	ENSMUST00000005019	cellular retinoic acid binding protein II	-1.76413	11.532	-11.8935	2.12972e-07	1.77655e-05	7.67391	ERK240min
Rasgrp3	RASGRP3	ENSMUST00000095204	RAS, guanyl releasing protein 3	2.94237	4.11294	11.8913	2.13357e-07	1.77655e-05	7.67206	ERK240min
Cdx1	CDX1	ENSMUST00000025521	caudal type homeobox 1	2.22822	8.12783	11.884	2.14641e-07	1.78023e-05	7.66593	ERK240min
Tmem229a	TMEM229A	ENSMUST00000127247	transmembrane protein 229A	3.98312	5.17867	11.8808	2.15195e-07	1.78036e-05	7.66329	ERK240min
Ostm1	OSTM1		osteopetrosis associated transmembrane protein 1	-1.48422	10.8804	-11.8763	2.15992e-07	1.7825e-05	7.65951	ERK240min
Anxa3	ANXA3	ENSMUST00000112985	annexin A3	1.81733	8.14549	11.8626	2.18446e-07	1.7955e-05	7.64797	ERK240min
Gna14	GNA14	ENSMUST00000025602	guanine nucleotide binding protein, alpha 14	3.66795	6.60862	11.8615	2.18653e-07	1.7955e-05	7.647	ERK240min
Hexb	HEXB		hexosaminidase B	-1.69447	12.8331	-11.844	2.21823e-07	1.81254e-05	7.63228	ERK240min
Ubxn11	UBXN11	ENSMUST00000097851	UBX domain protein 11	-1.75689	9.0276	-11.8059	2.28911e-07	1.85533e-05	7.60012	ERK240min
Ldhb	LDHB		lactate dehydrogenase B	-2.52974	15.5856	-11.8041	2.29248e-07	1.85533e-05	7.59862	ERK240min
Sod2	SOD2	ENSMUST00000007012	superoxide dismutase 2, mitochondrial	-1.4182	16.1633	-11.804	2.29278e-07	1.85533e-05	7.59848	ERK240min
Acaa2	ACAA2	ENSMUST00000041053	acetyl-Coenzyme A acyltransferase 2 (mitochondrial 3-oxoacyl-Coenzyme A thiolase)	-1.99125	13.6475	-11.8038	2.29302e-07	1.85533e-05	7.59838	ERK240min
Esam	ESAM		endothelial cell-specific adhesion molecule	4.95099	6.13732	11.7984	2.30335e-07	1.85716e-05	7.59378	ERK240min
Nanogpd			Nanog homeobox related gene	-4.59459	12.5147	-11.7968	2.30651e-07	1.85716e-05	7.59238	ERK240min
Pdyn	PDYN	ENSMUST00000028883	prodynorphin	2.7968	8.03086	11.7808	2.33713e-07	1.87556e-05	7.57889	ERK240min
Rhbdl2	RHBDL2	ENSMUST00000148797	rhomboid, veinlet-like 2 (Drosophila)	-1.76291	7.67167	-11.7724	2.35347e-07	1.88124e-05	7.57176	ERK240min
Hic1	HIC1	ENSMUST00000055619	hypermethylated in cancer 1	2.14825	6.07006	11.7528	2.39217e-07	1.90757e-05	7.55507	ERK240min
Pax6	PAX6	ENSMUST00000090397	paired box gene 6	-2.33024	7.24423	-11.7269	2.44415e-07	1.94433e-05	7.53307	ERK240min
Arhgef10l	ARHGEF10L	ENSMUST00000069623	Rho guanine nucleotide exchange factor (GEF) 10-like	-1.86801	10.7169	-11.6791	2.54353e-07	2.01154e-05	7.49228	ERK240min
Tmem191c	TMEM191C		transmembrane protein 191C	-1.86744	10.3254	-11.6691	2.56487e-07	2.01154e-05	7.48372	ERK240min
Hecw2	HECW2	ENSMUST00000120904	HECT, C2 and WW domain containing E3 ubiquitin protein ligase 2	-3.18015	5.72214	-11.6677	2.56776e-07	2.01154e-05	7.48257	ERK240min
Prkaa2	PRKAA2	ENSMUST00000030243	protein kinase, AMP-activated, alpha 2 catalytic subunit	-1.38983	8.4716	-11.6677	2.56778e-07	2.01154e-05	7.48256	ERK240min
Pycr2	PYCR2		pyrroline-5-carboxylate reductase family, member 2	-1.4167	15.0744	-11.6666	2.57012e-07	2.01154e-05	7.48163	ERK240min
Ctgf	CTGF	ENSMUST00000020171	connective tissue growth factor	-1.53853	11.668	-11.6616	2.58085e-07	2.01434e-05	7.47736	ERK240min
Shf	SHF	ENSMUST00000110531	Src homology 2 domain containing F	-1.22761	11.234	-11.6316	2.64654e-07	2.05442e-05	7.45162	ERK240min
Zswim6	ZSWIM6		zinc finger, SWIM domain containing 6	1.91806	9.61538	11.6301	2.64977e-07	2.05442e-05	7.45037	ERK240min
Pls3	PLS3	ENSMUST00000114060	plastin 3 (T-isoform)	-2.22068	10.8269	-11.6297	2.65083e-07	2.05442e-05	7.44996	ERK240min
Ng23			Ng23 protein	-2.4072	7.5706	-11.6186	2.67542e-07	2.06864e-05	7.44051	ERK240min
Serping1	SERPING1	ENSMUST00000023994	serine (or cysteine) peptidase inhibitor, clade G, member 1	-3.14434	8.15199	-11.6033	2.71004e-07	2.08566e-05	7.42733	ERK240min
Srgap3	SRGAP3	ENSMUST00000133702	SLIT-ROBO Rho GTPase activating protein 3	-3.55866	8.21108	-11.5826	2.75775e-07	2.11745e-05	7.40945	ERK240min
Junb	JUNB	ENSMUST00000064922	Jun-B oncogene	2.20348	7.56461	11.5751	2.77516e-07	2.12209e-05	7.403	ERK240min
Tubb2a	TUBB2A	ENSMUST00000056427	tubulin, beta 2A	-1.81415	13.0699	-11.5717	2.78303e-07	2.12209e-05	7.4001	ERK240min
Fry	FRY		furry homolog (Drosophila)	-1.81298	8.59538	-11.5667	2.7948e-07	2.12617e-05	7.39578	ERK240min
Gm10046		ENSMUST00000077702	predicted gene 10046	-2.71419	7.89956	-11.5521	2.8294e-07	2.14292e-05	7.38317	ERK240min
Fam169b		ENSMUST00000098378	family with sequence similarity 169, member B	-3.67953	8.23932	-11.5484	2.83818e-07	2.14421e-05	7.37999	ERK240min
Anxa6	ANXA6		annexin A6	-1.63604	13.8417	-11.5458	2.84443e-07	2.14421e-05	7.37774	ERK240min
Flt1	FLT1	ENSMUST00000031653	FMS-like tyrosine kinase 1	3.26591	5.66454	11.5426	2.85206e-07	2.14508e-05	7.37499	ERK240min
Cdhr1	CDHR1	ENSMUST00000022337	cadherin-related family member 1	-5.6255	9.2285	-11.529	2.88512e-07	2.15899e-05	7.36318	ERK240min
Ptch1	PTCH1		patched homolog 1	-1.91608	8.80963	-11.5286	2.88608e-07	2.15899e-05	7.36283	ERK240min
Ppm1j	PPM1J	ENSMUST00000002298	protein phosphatase 1J	2.56121	11.3229	11.5269	2.89014e-07	2.15899e-05	7.3614	ERK240min
Gpr68	GPR68		G protein-coupled receptor 68	-2.96275	5.56707	-11.5034	2.94805e-07	2.19236e-05	7.34105	ERK240min
Dusp27	DUSP27		dual specificity phosphatase 27 (putative)	-2.70724	10.162	-11.4959	2.96679e-07	2.20135e-05	7.33456	ERK240min
Tcf7l1	TCF7L1	ENSMUST00000114053	transcription factor 7-like 1 (T-cell specific, HMG box)	-2.46878	11.2724	-11.4909	2.97949e-07	2.20582e-05	7.33018	ERK240min
Id4	ID4	ENSMUST00000021810	inhibitor of DNA binding 4	-3.85771	8.80842	-11.4827	3.00011e-07	2.21613e-05	7.3231	ERK240min
Mtap6			microtubule-associated protein 6	-2.74515	10.3436	-11.468	3.03778e-07	2.23398e-05	7.31031	ERK240min
Dlk1	DLK1		delta-like 1 homolog (Drosophila)	1.55841	6.29508	11.4427	3.10388e-07	2.27754e-05	7.28822	ERK240min
Chst8	CHST8	ENSMUST00000154629	carbohydrate (N-acetylgalactosamine 4-0) sulfotransferase 8	-4.38498	8.32328	-11.4339	3.12716e-07	2.28954e-05	7.28056	ERK240min
Pdcl2	PDCL2		phosducin-like 2	-1.76236	9.63261	-11.4284	3.14172e-07	2.29512e-05	7.27579	ERK240min
Smr3a			submaxillary gland androgen regulated protein 3A	-2.10547	5.08819	-11.4248	3.1513e-07	2.29705e-05	7.27267	ERK240min
Tcfcp2l1			transcription factor CP2-like 1	-2.39469	13.4724	-11.4207	3.16234e-07	2.30003e-05	7.26908	ERK240min
Padi2	PADI2	ENSMUST00000030765	peptidyl arginine deiminase, type II	-2.95469	8.92094	-11.4182	3.16929e-07	2.30003e-05	7.26683	ERK240min
Fis1	FIS1	ENSMUST00000111094	fission 1 (mitochondrial outer membrane) homolog (yeast)	1.34757	9.71783	11.4089	3.19431e-07	2.31311e-05	7.25876	ERK240min
1190003J15Rik		ENSMUST00000106050	RIKEN cDNA 1190003J15 gene	2.21368	13.5177	11.4061	3.20211e-07	2.3137e-05	7.25626	ERK240min
Tshr	TSHR	ENSMUST00000021343	thyroid stimulating hormone receptor	1.63005	2.22268	11.403	3.21052e-07	2.3147e-05	7.25357	ERK240min
Dock4	DOCK4	ENSMUST00000037488	dedicator of cytokinesis 4	2.30334	8.0972	11.3992	3.22096e-07	2.3147e-05	7.25023	ERK240min
Naprt1		ENSMUST00000023237	nicotinate phosphoribosyltransferase domain containing 1	3.23661	12.5768	11.3979	3.22448e-07	2.3147e-05	7.24911	ERK240min
Prdm1	PRDM1	ENSMUST00000039174	PR domain containing 1, with ZNF domain	-2.0567	10.1042	-11.3934	3.23689e-07	2.31858e-05	7.24517	ERK240min
Dhrs3	DHRS3	ENSMUST00000105745	dehydrogenase/reductase (SDR family) member 3	-2.14488	8.34038	-11.3907	3.24445e-07	2.31897e-05	7.24278	ERK240min
Prdm14	PRDM14	ENSMUST00000115400	PR domain containing 14	-4.62319	11.2076	-11.3799	3.27436e-07	2.33531e-05	7.23336	ERK240min
Copz2	COPZ2		coatomer protein complex, subunit zeta 2	-2.86614	7.98843	-11.3733	3.29297e-07	2.34033e-05	7.22754	ERK240min
Prkar2b	PRKAR2B	ENSMUST00000036497	protein kinase, cAMP dependent regulatory, type II beta	-2.00242	6.053	-11.3724	3.29554e-07	2.34033e-05	7.22674	ERK240min
Cdk19	CDK19	ENSMUST00000044672	cyclin-dependent kinase 19	-1.47285	9.32786	-11.3655	3.31502e-07	2.34645e-05	7.22069	ERK240min
Gm4907	TES	ENSMUST00000062738	predicted gene 4907	2.19727	10.0038	11.3643	3.31834e-07	2.34645e-05	7.21966	ERK240min
D630039A03Rik	C9orf152		RIKEN cDNA D630039A03 gene	-4.31489	6.93608	-11.3545	3.34628e-07	2.35983e-05	7.21105	ERK240min
P2rx2	P2RX2	ENSMUST00000058016	purinergic receptor P2X, ligand-gated ion channel, 2	-2.38903	8.84174	-11.3526	3.35153e-07	2.35983e-05	7.20945	ERK240min
Prokr2	PROKR2	ENSMUST00000049997	prokineticin receptor 2	3.90465	2.9179	11.3436	3.37758e-07	2.36905e-05	7.2015	ERK240min
Fgf4	FGF4	ENSMUST00000060336	fibroblast growth factor 4	-2.16853	15.1103	-11.3325	3.40969e-07	2.3728e-05	7.19178	ERK240min
Itga7	ITGA7	ENSMUST00000105228	integrin alpha 7	1.56956	8.47408	11.3325	3.40996e-07	2.3728e-05	7.1917	ERK240min
Pcdh1	PCDH1		protocadherin 1	1.87247	9.7916	11.3235	3.43635e-07	2.37836e-05	7.18378	ERK240min
Actn3	ACTN3	ENSMUST00000006626	actinin alpha 3	-1.96606	9.23394	-11.3215	3.44227e-07	2.37836e-05	7.18202	ERK240min
Nlrc4	NLRC4	ENSMUST00000052124	NLR family, CARD domain containing 4	4.6953	7.48998	11.3214	3.44252e-07	2.37836e-05	7.18194	ERK240min
Rpp25	RPP25		ribonuclease P 25 subunit (human)	-2.34658	11.849	-11.3104	3.47508e-07	2.39585e-05	7.17227	ERK240min
Tmem132d	TMEM132D		transmembrane protein 132D	-2.28519	6.97263	-11.296	3.51841e-07	2.42068e-05	7.15955	ERK240min
Patl2	PATL2		protein associated with topoisomerase II homolog 2 (yeast)	-1.53813	11.7635	-11.2748	3.58299e-07	2.4549e-05	7.14086	ERK240min
Pdzk1	PDZK1	ENSMUST00000058865	PDZ domain containing 1	-3.02594	9.5903	-11.2437	3.68037e-07	2.51122e-05	7.11331	ERK240min
Etv4	ETV4	ENSMUST00000107176	ets variant gene 4 (E1A enhancer binding protein, E1AF)	4.97637	10.8563	11.2402	3.69141e-07	2.51358e-05	7.11024	ERK240min
Zdhhc2	ZDHHC2		zinc finger, DHHC domain containing 2	-1.64603	5.85404	-11.2366	3.70314e-07	2.51639e-05	7.10697	ERK240min
Cacna2d1	CACNA2D1		calcium channel, voltage-dependent, alpha2/delta subunit 1	2.12033	6.84767	11.2308	3.72173e-07	2.52383e-05	7.10183	ERK240min
Rln1	RLN1		relaxin 1	-1.58862	8.55304	-11.1981	3.82816e-07	2.58314e-05	7.07285	ERK240min
Slc25a45	SLC25A45	ENSMUST00000025732	solute carrier family 25, member 45	3.26931	5.7598	11.1956	3.83646e-07	2.58314e-05	7.07062	ERK240min
Ctxn3	CTXN3		cortexin 3	3.13612	3.89459	11.1944	3.84047e-07	2.58314e-05	7.06955	ERK240min
Tmem54	TMEM54	ENSMUST00000106064	transmembrane protein 54	2.18411	8.97875	11.1921	3.84821e-07	2.58314e-05	7.06748	ERK240min
Nxnl2	NXNL2		nucleoredoxin-like 2	2.24321	7.79479	11.1809	3.88562e-07	2.60297e-05	7.05753	ERK240min
Serpinf1	SERPINF1	ENSMUST00000094022	serine (or cysteine) peptidase inhibitor, clade F, member 1	2.06768	6.75576	11.1685	3.92763e-07	2.6258e-05	7.04648	ERK240min
Qk	QKI	ENSMUST00000042296	quaking	-1.51177	10.2377	-11.1618	3.95076e-07	2.63535e-05	7.04044	ERK240min
Pxdn	PXDN	ENSMUST00000021008	peroxidasin homolog (Drosophila)	2.91693	9.8299	11.1597	3.95784e-07	2.63535e-05	7.0386	ERK240min
Txnip	TXNIP	ENSMUST00000090771	thioredoxin interacting protein	1.58486	9.76598	11.1574	3.96584e-07	2.63537e-05	7.03652	ERK240min
Aff1	AFF1	ENSMUST00000031256	AF4/FMR2 family, member 1	-1.28847	11.8248	-11.1453	4.00779e-07	2.65791e-05	7.0257	ERK240min
Lpar6	LPAR6		lysophosphatidic acid receptor 6	2.66996	10.8893	11.1389	4.03012e-07	2.66738e-05	7.01999	ERK240min
Pdgfrl	PDGFRL		platelet-derived growth factor receptor-like	2.68306	7.68267	11.1226	4.08762e-07	2.70003e-05	7.00542	ERK240min
Id2	ID2	ENSMUST00000020974	inhibitor of DNA binding 2	-2.48749	11.0025	-11.1174	4.10605e-07	2.7068e-05	7.00079	ERK240min
Slc9a7	SLC9A7	ENSMUST00000072451	solute carrier family 9 (sodium/hydrogen exchanger), member 7	4.59339	5.16478	11.1117	4.12668e-07	2.71081e-05	6.99564	ERK240min
Aga	AGA	ENSMUST00000033920	aspartylglucosaminidase	-1.35226	8.23378	-11.1112	4.12851e-07	2.71081e-05	6.99518	ERK240min
Stk30		ENSMUST00000021701	serine/threonine kinase 30	-2.25962	8.90062	-11.0919	4.19846e-07	2.74131e-05	6.9779	ERK240min
Msh4	MSH4	ENSMUST00000070638	mutS homolog 4 (E. coli)	-2.59049	6.50008	-11.0916	4.19981e-07	2.74131e-05	6.97757	ERK240min
Adam8	ADAM8	ENSMUST00000106070	a disintegrin and metallopeptidase domain 8	1.67896	7.48287	11.0813	4.23754e-07	2.74454e-05	6.96837	ERK240min
Dmbx1	DMBX1	ENSMUST00000064806	diencephalon/mesencephalon homeobox 1	-2.29766	7.18882	-11.0812	4.23793e-07	2.74454e-05	6.96827	ERK240min
Myh13	MYH13		myosin, heavy polypeptide 13, skeletal muscle	-3.85558	8.09883	-11.0787	4.24737e-07	2.74528e-05	6.96598	ERK240min
Adap1	ADAP1	ENSMUST00000151450	ArfGAP with dual PH domains 1	-1.82268	14.2731	-11.0739	4.26503e-07	2.75132e-05	6.96171	ERK240min
Igfbpl1	IGFBPL1		insulin-like growth factor binding protein-like 1	-4.31963	6.56359	-11.0606	4.31494e-07	2.7781e-05	6.94974	ERK240min
Plxdc1	PLXDC1	ENSMUST00000107565	plexin domain containing 1	-2.31743	8.42967	-11.0447	4.37551e-07	2.81162e-05	6.93539	ERK240min
Antxr2	ANTXR2		anthrax toxin receptor 2	2.10934	4.82796	11.0332	4.4196e-07	2.82275e-05	6.92507	ERK240min
Arhgap25	ARHGAP25	ENSMUST00000071024	Rho GTPase activating protein 25	1.98157	2.31547	11.0321	4.42397e-07	2.82275e-05	6.92406	ERK240min
Ptk2b	PTK2B	ENSMUST00000136216	PTK2 protein tyrosine kinase 2 beta	1.84617	9.70903	11.0314	4.42694e-07	2.82275e-05	6.92337	ERK240min
Rasl11a	RASL11A	ENSMUST00000031646	RAS-like, family 11, member A	2.1821	6.02675	11.0276	4.44142e-07	2.82313e-05	6.92001	ERK240min
Hbegf	HBEGF	ENSMUST00000025363	heparin-binding EGF-like growth factor	2.20791	11.9754	11.0132	4.4982e-07	2.8517e-05	6.90693	ERK240min
Abcb1a	ABCB1	ENSMUST00000115373	ATP-binding cassette, sub-family B (MDR/TAP), member 1A	-1.6326	10.7719	-11.0029	4.53883e-07	2.86274e-05	6.89767	ERK240min
Ier5	IER5		immediate early response 5	1.62274	6.47191	10.9978	4.55946e-07	2.86856e-05	6.893	ERK240min
A430089I19Rik	OR5K3		RIKEN cDNA A430089I19 gene	-2.37098	5.20471	-10.9769	4.6438e-07	2.91422e-05	6.87413	ERK240min
Arhgef9	ARHGEF9	ENSMUST00000088084	CDC42 guanine nucleotide exchange factor (GEF) 9	2.23388	5.87818	10.9755	4.64964e-07	2.91422e-05	6.87284	ERK240min
Fam57b	FAM57B	ENSMUST00000079423	family with sequence similarity 57, member B	1.48247	6.16305	10.9634	4.69932e-07	2.93978e-05	6.86189	ERK240min
Ephx2	EPHX2	ENSMUST00000070515	epoxide hydrolase 2, cytoplasmic	-3.24157	12.3046	-10.9559	4.73052e-07	2.95372e-05	6.85508	ERK240min
Myb	MYB	ENSMUST00000020156	myeloblastosis oncogene	-2.75085	8.973	-10.9517	4.74845e-07	2.95377e-05	6.85118	ERK240min
Ly6g6d	LY6G6D	ENSMUST00000007259	lymphocyte antigen 6 complex, locus G6D	-1.55048	9.55547	-10.9484	4.76194e-07	2.9566e-05	6.84826	ERK240min
Fam154a	FAM154A	ENSMUST00000030216	family with sequence similarity 154, member A	-3.47564	5.08131	-10.9448	4.77739e-07	2.96064e-05	6.84492	ERK240min
Agrn	AGRN	ENSMUST00000105575	agrin	-2.03692	14.4026	-10.9334	4.82547e-07	2.98485e-05	6.83461	ERK240min
Pitx2	PITX2	ENSMUST00000029657	paired-like homeodomain transcription factor 2	-4.53539	6.55792	-10.9215	4.87669e-07	3.00529e-05	6.82373	ERK240min
Lrrfip1	LRRFIP1		leucine rich repeat (in FLII) interacting protein 1	1.90654	8.85882	10.9012	4.9651e-07	3.05409e-05	6.80522	ERK240min
Fut9	FUT9	ENSMUST00000108199	fucosyltransferase 9	-2.10626	6.45425	-10.8956	4.98956e-07	3.05958e-05	6.80016	ERK240min
Rhox10	RHOXF1		reproductive homeobox 10	1.93552	8.12665	10.884	5.0415e-07	3.08389e-05	6.78949	ERK240min
Tnfrsf12a	TNFRSF12A	ENSMUST00000024698	tumor necrosis factor receptor superfamily, member 12a	1.8403	12.182	10.8587	5.1557e-07	3.14213e-05	6.7664	ERK240min
Hes1	HES1	ENSMUST00000023171	hairy and enhancer of split 1 (Drosophila)	-2.09928	8.08831	-10.8438	5.22488e-07	3.1726e-05	6.75266	ERK240min
Nfatc2	NFATC2	ENSMUST00000151292	nuclear factor of activated T-cells, cytoplasmic, calcineurin-dependent 2	1.98561	7.64774	10.8264	5.30612e-07	3.21603e-05	6.73676	ERK240min
Arc	ARC		activity regulated cytoskeletal-associated protein	2.33863	12.9967	10.8205	5.3342e-07	3.22126e-05	6.73132	ERK240min
Klf4	KLF4	ENSMUST00000003116	Kruppel-like factor 4 (gut)	-3.44254	12.93	-10.8172	5.35004e-07	3.22493e-05	6.72826	ERK240min
Gbx2	GBX2	ENSMUST00000036954	gastrulation brain homeobox 2	4.21038	9.6917	10.8059	5.40436e-07	3.25175e-05	6.71785	ERK240min
Fam84a	FAM84A		family with sequence similarity 84, member A	4.46608	5.32367	10.7953	5.45576e-07	3.26805e-05	6.70808	ERK240min
Phyh	PHYH	ENSMUST00000027975	phytanoyl-CoA hydroxylase	-1.84642	11.8375	-10.7923	5.47025e-07	3.26805e-05	6.70535	ERK240min
Plxnc1	PLXNC1		plexin C1	3.39806	5.14492	10.7903	5.47975e-07	3.26805e-05	6.70356	ERK240min
Tmem192	TMEM192	ENSMUST00000026595	transmembrane protein 192	-1.32337	10.7836	-10.7772	5.5445e-07	3.30008e-05	6.69145	ERK240min
Tac1	TAC1		tachykinin 1	4.88229	4.53152	10.7743	5.55893e-07	3.30272e-05	6.68876	ERK240min
Fhod3	FHOD3		formin homology 2 domain containing 3	-2.58014	9.80271	-10.7667	5.59676e-07	3.31924e-05	6.68177	ERK240min
Apod	APOD	ENSMUST00000130560	apolipoprotein D	-1.82553	10.6423	-10.7536	5.66273e-07	3.35236e-05	6.66968	ERK240min
Cplx2	CPLX2		complexin 2	2.34789	6.02712	10.7413	5.72595e-07	3.38373e-05	6.65823	ERK240min
Chmp4c	CHMP4C		chromatin modifying protein 4C	-2.42028	8.65481	-10.7247	5.81157e-07	3.4282e-05	6.64292	ERK240min
Adamts1	ADAMTS1	ENSMUST00000023610	a disintegrin-like and metallopeptidase (reprolysin type) with thrombospondin type 1 motif, 1	2.40072	7.07183	10.7227	5.82229e-07	3.42842e-05	6.64102	ERK240min
Cbx4	CBX4		chromobox homolog 4 (Drosophila Pc class)	-1.46587	6.41571	-10.7137	5.86939e-07	3.45001e-05	6.6327	ERK240min
Vsig2	VSIG2		V-set and immunoglobulin domain containing 2	2.27102	8.64026	10.7	5.942e-07	3.48033e-05	6.62002	ERK240min
Sdcbp2	SDCBP2	ENSMUST00000028950	syndecan binding protein (syntenin) 2	2.02655	8.55287	10.6907	5.99229e-07	3.50358e-05	6.61132	ERK240min
Npr1	NPR1	ENSMUST00000142243	natriuretic peptide receptor 1	2.27639	2.48875	10.6881	6.00609e-07	3.50546e-05	6.60895	ERK240min
Srd5a3	SRD5A3	ENSMUST00000031143	steroid 5 alpha-reductase 3	-1.39904	9.74034	-10.6839	6.02882e-07	3.50728e-05	6.60505	ERK240min
Tnip1	TNIP1	ENSMUST00000102731	TNFAIP3 interacting protein 1	-1.55395	14.0116	-10.6836	6.03041e-07	3.50728e-05	6.60478	ERK240min
Aig1	AIG1	ENSMUST00000019942	androgen-induced 1	1.72641	7.55646	10.669	6.11049e-07	3.54141e-05	6.59116	ERK240min
Ccdc28b	CCDC28B	ENSMUST00000030586	coiled coil domain containing 28B	1.48132	11.0118	10.6644	6.13619e-07	3.54444e-05	6.58683	ERK240min
R3hdml	R3HDML	ENSMUST00000109416	R3H domain containing-like	-2.25429	6.88079	-10.6633	6.14182e-07	3.54444e-05	6.58588	ERK240min
Frat1	FRAT1		frequently rearranged in advanced T-cell lymphomas	-1.64007	8.60014	-10.6622	6.14785e-07	3.54444e-05	6.58487	ERK240min
Rnd3	RND3		Rho family GTPase 3	-1.81252	10.029	-10.6592	6.16478e-07	3.54446e-05	6.58203	ERK240min
Fmn2	FMN2		formin 2	1.57743	8.88025	10.658	6.17154e-07	3.54446e-05	6.5809	ERK240min
2010107G23Rik	C10orf35		RIKEN cDNA 2010107G23 gene	-2.13421	9.56445	-10.6559	6.18331e-07	3.54446e-05	6.57893	ERK240min
Rab4a	RAB4A	ENSMUST00000118535	RAB4A, member RAS oncogene family	-1.681	12.7959	-10.6529	6.19971e-07	3.54446e-05	6.5762	ERK240min
Smtn	SMTN	ENSMUST00000144635	smoothelin	1.36083	9.6195	10.6526	6.20158e-07	3.54446e-05	6.57589	ERK240min
Taok2	TAOK2	ENSMUST00000071268	TAO kinase 2	-1.4756	6.36954	-10.6493	6.22028e-07	3.54446e-05	6.57278	ERK240min
Peg3	PEG3		paternally expressed 3	-2.26403	7.7937	-10.6488	6.22287e-07	3.54446e-05	6.57235	ERK240min
Pgap1	PGAP1	ENSMUST00000094950	post-GPI attachment to proteins 1	-1.35858	6.33788	-10.6346	6.3036e-07	3.58428e-05	6.55904	ERK240min
Arhgef26	ARHGEF26	ENSMUST00000079300	Rho guanine nucleotide exchange factor (GEF) 26	2.26145	6.02338	10.623	6.36995e-07	3.6096e-05	6.54823	ERK240min
Hspa1a	HSPA1A	ENSMUST00000087328	heat shock protein 1A	1.42497	6.43656	10.599	6.51008e-07	3.67843e-05	6.52576	ERK240min
Rhd	RHCE	ENSMUST00000030627	Rh blood group, D antigen	2.87094	9.9402	10.5678	6.69712e-07	3.76918e-05	6.49651	ERK240min
Rsph3a	RSPH3		radial spoke 3A homolog (Chlamydomonas)	1.30007	6.7824	10.5653	6.71223e-07	3.76992e-05	6.49418	ERK240min
Mapt	MAPT	ENSMUST00000018555	microtubule-associated protein tau	-2.65991	10.3899	-10.562	6.73261e-07	3.76992e-05	6.49105	ERK240min
Sash1	SASH1		SAM and SH3 domain containing 1	-1.56136	12.2384	-10.5515	6.79699e-07	3.79313e-05	6.48122	ERK240min
Elavl2	ELAVL2		ELAV (embryonic lethal, abnormal vision, Drosophila)-like 2 (Hu antigen B)	-1.46943	7.49684	-10.5268	6.95225e-07	3.87325e-05	6.45788	ERK240min
Idh1	IDH1	ENSMUST00000097709	isocitrate dehydrogenase 1 (NADP+), soluble	-1.58852	8.70489	-10.5179	7.00904e-07	3.89178e-05	6.44948	ERK240min
Socs5	SOCS5	ENSMUST00000041369	suppressor of cytokine signaling 5	2.70835	6.37413	10.5094	7.06335e-07	3.91537e-05	6.4415	ERK240min
Tbx3	TBX3	ENSMUST00000079719	T-box 3	-3.21682	12.868	-10.5036	7.10062e-07	3.92944e-05	6.43606	ERK240min
Tmem14a	TMEM14A	ENSMUST00000027065	transmembrane protein 14A	-1.38626	9.54235	-10.4955	7.15346e-07	3.95165e-05	6.4284	ERK240min
Fstl1	FSTL1	ENSMUST00000114763	follistatin-like 1	-1.8794	12.7274	-10.4938	7.16463e-07	3.95165e-05	6.42679	ERK240min
Rfx2	RFX2		regulatory factor X, 2 (influences HLA class II expression)	-2.31856	8.32182	-10.4919	7.17716e-07	3.95198e-05	6.42498	ERK240min
Zfp618	ZNF618	ENSMUST00000064814	zinc fingerprotein 618	-1.13122	8.21559	-10.4868	7.21116e-07	3.95822e-05	6.4201	ERK240min
Slc39a8	SLC39A8	ENSMUST00000029810	solute carrier family 39 (metal ion transporter), member 8	2.9619	4.99952	10.4866	7.21243e-07	3.95822e-05	6.41992	ERK240min
B3galt4	B3GALT4		UDP-Gal:betaGlcNAc beta 1,3-galactosyltransferase, polypeptide 4	-1.111	8.88686	-10.4705	7.3194e-07	4.00879e-05	6.4047	ERK240min
Gnb4	GNB4	ENSMUST00000029212	guanine nucleotide binding protein (G protein), beta 4	-2.17754	8.68142	-10.4691	7.32879e-07	4.00879e-05	6.40337	ERK240min
Nlrp4a	NLRP4	ENSMUST00000119386	NLR family, pyrin domain containing 4A	-3.09367	5.55674	-10.4585	7.40058e-07	4.04138e-05	6.3933	ERK240min
9130008F23Rik	C6orf141		RIKEN cDNA 9130008F23 gene	4.6333	5.11039	10.4526	7.44045e-07	4.05267e-05	6.38774	ERK240min
9830147E19Rik			RIKEN cDNA 9830147E19 gene	-1.71492	11.3432	-10.4518	7.44576e-07	4.05267e-05	6.387	ERK240min
Ckb	CKB	ENSMUST00000001304	creatine kinase, brain	-2.45751	13.9561	-10.4464	7.4832e-07	4.06164e-05	6.38182	ERK240min
Osta			organic solute transporter alpha	-3.86668	6.54977	-10.4324	7.58017e-07	4.09256e-05	6.36851	ERK240min
Btnl3		ENSMUST00000137617	butyrophilin-like 3	-4.51741	7.17473	-10.4316	7.58552e-07	4.09256e-05	6.36778	ERK240min
Cyp2s1	CYP2S1	ENSMUST00000043314	cytochrome P450, family 2, subfamily s, polypeptide 1	-1.71819	12.1298	-10.4305	7.59324e-07	4.09256e-05	6.36673	ERK240min
Alpl	ALPL	ENSMUST00000030551	alkaline phosphatase, liver/bone/kidney	-2.34551	12.3781	-10.4238	7.64019e-07	4.09784e-05	6.36035	ERK240min
Pon3	PON3	ENSMUST00000129344	paraoxonase 3	1.40538	6.67353	10.4111	7.73014e-07	4.13938e-05	6.34825	ERK240min
Slc44a3	SLC44A3		solute carrier family 44, member 3	-3.67677	5.55631	-10.4042	7.77951e-07	4.15908e-05	6.34167	ERK240min
G0s2	G0S2		G0/G1 switch gene 2	-1.99211	6.74903	-10.3955	7.84198e-07	4.18089e-05	6.33339	ERK240min
Ehbp1l1	EHBP1L1		EH domain binding protein 1-like 1	1.99069	9.45586	10.3743	7.99695e-07	4.25471e-05	6.31315	ERK240min
Ptpdc1	PTPDC1		protein tyrosine phosphatase domain containing 1	1.22001	8.5187	10.3704	8.02589e-07	4.26326e-05	6.30942	ERK240min
Parvb	PARVB	ENSMUST00000023072	parvin, beta	1.72224	9.60129	10.3646	8.06883e-07	4.27774e-05	6.3039	ERK240min
Nefm	NEFM		neurofilament, medium polypeptide	2.97245	4.82573	10.3632	8.079e-07	4.27774e-05	6.30259	ERK240min
Ankrd35	ANKRD35		ankyrin repeat domain 35	-1.1934	9.7962	-10.3576	8.12115e-07	4.29318e-05	6.29721	ERK240min
Pnrc2	PNRC2	ENSMUST00000030436	proline-rich nuclear receptor coactivator 2	-1.40661	11.8975	-10.3401	8.254e-07	4.33686e-05	6.28042	ERK240min
Aadac	AADAC	ENSMUST00000029325	arylacetamide deacetylase (esterase)	3.84745	5.86674	10.3398	8.2562e-07	4.33686e-05	6.28015	ERK240min
Glcci1	GLCCI1	ENSMUST00000050350	glucocorticoid induced transcript 1	-1.80084	8.40362	-10.3358	8.28646e-07	4.34409e-05	6.27636	ERK240min
Wdr6	WDR6	ENSMUST00000068700	WD repeat domain 6	-1.56497	10.7586	-10.3346	8.29622e-07	4.34409e-05	6.27515	ERK240min
Cabyr	CABYR		calcium-binding tyrosine-(Y)-phosphorylation regulated (fibrousheathin 2)	-1.73648	5.04174	-10.3235	8.38203e-07	4.37063e-05	6.2645	ERK240min
Ppl	PPL	ENSMUST00000035672	periplakin	2.96096	8.19324	10.3234	8.38268e-07	4.37063e-05	6.26442	ERK240min
6330407J23Rik			RIKEN cDNA 6330407J23 gene	3.3068	8.35649	10.3216	8.39665e-07	4.37063e-05	6.2627	ERK240min
Mcc	MCC		mutated in colorectal cancers	2.38339	9.34209	10.3201	8.40864e-07	4.37063e-05	6.26122	ERK240min
Zfp182	ZNF182	ENSMUST00000115333	zinc finger protein 182	-1.7445	9.35378	-10.3195	8.41293e-07	4.37063e-05	6.26069	ERK240min
Camk2n1	CAMK2N1		calcium/calmodulin-dependent protein kinase II inhibitor 1	-2.55841	7.03613	-10.3144	8.45306e-07	4.38361e-05	6.25577	ERK240min
Wnt5b	WNT5B	ENSMUST00000117171	wingless-related MMTV integration site 5B	2.12091	7.27817	10.3128	8.46587e-07	4.38361e-05	6.2542	ERK240min
Rest	REST	ENSMUST00000113448	RE1-silencing transcription factor	-1.53607	13.9603	-10.3096	8.49089e-07	4.38361e-05	6.25115	ERK240min
Slc45a1	SLC45A1		solute carrier family 45, member 1	2.45276	7.42669	10.301	8.55867e-07	4.40903e-05	6.24292	ERK240min
Slc13a4	SLC13A4	ENSMUST00000031868	solute carrier family 13 (sodium/sulfate symporters), member 4	-2.56428	7.51616	-10.2992	8.5728e-07	4.40903e-05	6.24121	ERK240min
LOC100503880			hypothetical protein LOC100503880	-4.71432	5.56816	-10.2973	8.58792e-07	4.40903e-05	6.23939	ERK240min
Acsbg1	ACSBG1		acyl-CoA synthetase bubblegum family member 1	2.25274	5.6756	10.2919	8.63137e-07	4.41724e-05	6.23416	ERK240min
Dusp1	DUSP1	ENSMUST00000126178	dual specificity phosphatase 1	2.14272	11.1428	10.2913	8.63614e-07	4.41724e-05	6.23359	ERK240min
Slc39a3	SLC39A3	ENSMUST00000117276	solute carrier family 39 (zinc transporter), member 3	-1.66572	8.81839	-10.2865	8.67482e-07	4.42824e-05	6.22897	ERK240min
Maged1	MAGED1	ENSMUST00000153386	melanoma antigen, family D, 1	-1.61831	12.0667	-10.2853	8.6844e-07	4.42824e-05	6.22782	ERK240min
Ociad2	OCIAD2		OCIA domain containing 2	2.04828	8.19276	10.2812	8.71814e-07	4.43861e-05	6.22381	ERK240min
Rnase4	RNASE4		ribonuclease, RNase A family 4	-1.70232	9.06304	-10.2739	8.77713e-07	4.45914e-05	6.21683	ERK240min
Slco4c1	SLCO4C1		solute carrier organic anion transporter family, member 4C1	-4.49544	7.42663	-10.2729	8.78541e-07	4.45914e-05	6.21585	ERK240min
Ceacam16	CEACAM16		carcinoembryonic antigen-related cell adhesion molecule 16	1.64492	7.06853	10.2667	8.83602e-07	4.47429e-05	6.20991	ERK240min
Myo5c	MYO5C		myosin VC	-2.1451	5.90665	-10.266	8.84231e-07	4.47429e-05	6.20917	ERK240min
Igsf10	IGSF10	ENSMUST00000039419	immunoglobulin superfamily, member 10	-1.87025	6.02951	-10.2531	8.94885e-07	4.51187e-05	6.19677	ERK240min
Mcf2	MCF2	ENSMUST00000033478	mcf.2 transforming sequence	-5.38105	11.5747	-10.2527	8.95278e-07	4.51187e-05	6.19632	ERK240min
Tiparp	TIPARP		TCDD-inducible poly(ADP-ribose) polymerase	1.94594	11.9288	10.2521	8.95749e-07	4.51187e-05	6.19577	ERK240min
BC057022			cDNA sequence BC057022	-2.41783	8.41835	-10.2505	8.97113e-07	4.51188e-05	6.1942	ERK240min
Amotl2	AMOTL2	ENSMUST00000142011	angiomotin-like 2	-1.62411	10.5322	-10.2425	9.0385e-07	4.53199e-05	6.18645	ERK240min
Dpys	DPYS	ENSMUST00000110306	dihydropyrimidinase	-1.85372	11.0128	-10.2358	9.09517e-07	4.54662e-05	6.17998	ERK240min
Cacng7	CACNG7	ENSMUST00000092891	calcium channel, voltage-dependent, gamma subunit 7	3.23897	11.0871	10.2326	9.12186e-07	4.55309e-05	6.17695	ERK240min
Ttc39a	TTC39A		tetratricopeptide repeat domain 39A	3.10728	5.35792	10.2258	9.18044e-07	4.56921e-05	6.17032	ERK240min
Msmp	MSMP	ENSMUST00000107884	microseminoprotein, prostate associated	3.08114	5.02545	10.2256	9.18177e-07	4.56921e-05	6.17017	ERK240min
Ano4	ANO4	ENSMUST00000070175	anoctamin 4	3.23898	2.98855	10.2228	9.20574e-07	4.57051e-05	6.16747	ERK240min
Wnt3	WNT3	ENSMUST00000000127	wingless-related MMTV integration site 3	-2.86085	3.54329	-10.2172	9.25469e-07	4.58481e-05	6.16198	ERK240min
Renbp	RENBP	ENSMUST00000155597	renin binding protein	-1.26401	12.2519	-10.1976	9.42537e-07	4.64849e-05	6.14305	ERK240min
Chpt1	CHPT1	ENSMUST00000073783	choline phosphotransferase 1	-1.99557	9.81986	-10.195	9.44901e-07	4.65321e-05	6.14046	ERK240min
Fabp3	FABP3		fatty acid binding protein 3, muscle and heart	-3.02703	14.8399	-10.1876	9.51428e-07	4.67451e-05	6.13333	ERK240min
Sall2	SALL2	ENSMUST00000058326	sal-like 2 (Drosophila)	-2.28867	7.73916	-10.1858	9.53069e-07	4.67451e-05	6.13155	ERK240min
Rnd1	RND1	ENSMUST00000003451	Rho family GTPase 1	-1.6495	10.6314	-10.1854	9.53464e-07	4.67451e-05	6.13112	ERK240min
Kcnj12	KCNJ12	ENSMUST00000108717	potassium inwardly-rectifying channel, subfamily J, member 12	-3.25267	7.71124	-10.1792	9.58942e-07	4.68902e-05	6.12518	ERK240min
Trim44	TRIM44	ENSMUST00000090507	tripartite motif-containing 44	1.63719	12.8707	10.1789	9.59257e-07	4.68902e-05	6.12484	ERK240min
Tub	TUB	ENSMUST00000033341	tubby candidate gene	1.40348	8.17749	10.1702	9.67144e-07	4.7206e-05	6.11636	ERK240min
Bbx	BBX		bobby sox homolog (Drosophila)	1.84056	9.69105	10.1487	9.86871e-07	4.80231e-05	6.09544	ERK240min
Tle3	TLE3	ENSMUST00000162583	transducin-like enhancer of split 3, homolog of Drosophila E(spl)	-1.33079	13.1671	-10.1479	9.876e-07	4.80231e-05	6.09468	ERK240min
Mtmr12	MTMR12		myotubularin related protein 12	-2.13354	12.4517	-10.1407	9.94372e-07	4.81797e-05	6.0876	ERK240min
Wipf3	WIPF3	ENSMUST00000132855	WAS/WASL interacting protein family, member 3	2.09219	8.31735	10.1354	9.99276e-07	4.83465e-05	6.0825	ERK240min
Cyp26a1	CYP26A1	ENSMUST00000025946	cytochrome P450, family 26, subfamily a, polypeptide 1	3.03027	6.80663	10.1229	1.01116e-06	4.88039e-05	6.07025	ERK240min
Id1	ID1	ENSMUST00000109824	inhibitor of DNA binding 1	2.72443	12.7773	10.1223	1.01168e-06	4.88039e-05	6.06972	ERK240min
Nppb		ENSMUST00000103231	natriuretic peptide type B	2.44781	8.11763	10.1151	1.01864e-06	4.88465e-05	6.06261	ERK240min
Spry2	SPRY2	ENSMUST00000022709	sprouty homolog 2 (Drosophila)	2.31286	10.1642	10.115	1.01874e-06	4.88465e-05	6.06252	ERK240min
Adk	ADK	ENSMUST00000112461	adenosine kinase	1.62954	11.567	10.1146	1.01911e-06	4.88465e-05	6.06213	ERK240min
Tmem104	TMEM104		transmembrane protein 104	-1.604	8.42542	-10.1139	1.01977e-06	4.88465e-05	6.06146	ERK240min
Mapk6	MAPK6	ENSMUST00000049355	mitogen-activated protein kinase 6	1.35938	12.8717	10.1137	1.01994e-06	4.88465e-05	6.06129	ERK240min
Pde10a	PDE10A	ENSMUST00000115717	phosphodiesterase 10A	2.67082	4.44604	10.1003	1.03292e-06	4.93968e-05	6.04818	ERK240min
Sorbs1	SORBS1		sorbin and SH3 domain containing 1	-2.67423	10.4139	-10.0976	1.03557e-06	4.94517e-05	6.04553	ERK240min
Mesp1	MESP1	ENSMUST00000032760	mesoderm posterior 1	3.16215	3.40494	10.0795	1.05346e-06	5.02337e-05	6.02778	ERK240min
Kif5a	KIF5A	ENSMUST00000099172	kinesin family member 5A	-2.19903	11.0663	-10.0774	1.05554e-06	5.02603e-05	6.02574	ERK240min
Rlim	RLIM	ENSMUST00000121153	ring finger protein, LIM domain interacting	1.47324	8.25801	10.0639	1.06908e-06	5.0832e-05	6.01252	ERK240min
H2afy3			H2A histone family, member Y3	-2.04707	10.5577	-10.0548	1.07836e-06	5.09868e-05	6.00357	ERK240min
Fgd4	FGD4		FYVE, RhoGEF and PH domain containing 4	-1.52785	9.19515	-10.0547	1.0785e-06	5.09868e-05	6.00343	ERK240min
Adrbk2	ADRBK2		adrenergic receptor kinase, beta 2	-2.05357	6.6394	-10.0508	1.08252e-06	5.11037e-05	5.99958	ERK240min
Fam25c	FAM25A	ENSMUST00000052126	family with sequence similarity 25, member C	-1.41311	12.7199	-10.0438	1.08966e-06	5.12578e-05	5.99276	ERK240min
Spred3	SPRED3		sprouty-related, EVH1 domain containing 3	2.75559	4.06153	10.0418	1.09181e-06	5.12578e-05	5.99072	ERK240min
Kctd15	KCTD15	ENSMUST00000032709	potassium channel tetramerisation domain containing 15	-1.63114	12.0635	-10.0342	1.0997e-06	5.15317e-05	5.98325	ERK240min
Cntfr	CNTFR	ENSMUST00000102961	ciliary neurotrophic factor receptor	4.88983	4.98449	10.033	1.10093e-06	5.15317e-05	5.98209	ERK240min
2610019F03Rik		ENSMUST00000062613	RIKEN cDNA 2610019F03 gene	-2.02919	10.7707	-10.0246	1.10974e-06	5.18708e-05	5.97383	ERK240min
Cd55	CD55	ENSMUST00000027650	CD55 antigen	-2.52276	9.66931	-10.0228	1.11164e-06	5.18865e-05	5.97205	ERK240min
Clca3		ENSMUST00000029919	chloride channel calcium activated 3	4.05952	5.64605	10.0193	1.11536e-06	5.19868e-05	5.96859	ERK240min
Plekha2	PLEKHA2	ENSMUST00000128715	pleckstrin homology domain-containing, family A (phosphoinositide binding specific) member 2	-2.55544	7.96194	-10.0154	1.11946e-06	5.20435e-05	5.96478	ERK240min
Sfrp5	SFRP5	ENSMUST00000018966	secreted frizzled-related sequence protein 5	-2.31074	7.66604	-10.0152	1.11972e-06	5.20435e-05	5.96454	ERK240min
Tmeff1	TMEFF1		transmembrane protein with EGF-like and two follistatin-like domains 1	-1.21893	10.4324	-10.0026	1.13328e-06	5.24199e-05	5.95206	ERK240min
Auh	AUH	ENSMUST00000021913	AU RNA binding protein/enoyl-coenzyme A hydratase	-1.59085	11.6939	-10.0016	1.13436e-06	5.24199e-05	5.95107	ERK240min
Lfng	LFNG		LFNG O-fucosylpeptide 3-beta-N-acetylglucosaminyltransferase	-2.22543	6.04211	-9.99966	1.13641e-06	5.24199e-05	5.9492	ERK240min
Cdkn2b	CDKN2B	ENSMUST00000097981	cyclin-dependent kinase inhibitor 2B (p15, inhibits CDK4)	1.93632	7.52337	9.99694	1.13935e-06	5.24199e-05	5.94651	ERK240min
Podxl	PODXL	ENSMUST00000026698	podocalyxin-like	1.82453	8.0984	9.99641	1.13993e-06	5.24199e-05	5.94599	ERK240min
Egr2	EGR2	ENSMUST00000048289	early growth response 2	3.71234	5.96675	9.9962	1.14016e-06	5.24199e-05	5.94578	ERK240min
Gata2	GATA2	ENSMUST00000015197	GATA binding protein 2	-3.17633	6.87545	-9.99589	1.14049e-06	5.24199e-05	5.94548	ERK240min
Anxa8	ANXA8		annexin A8	-1.59233	8.72943	-9.98607	1.15123e-06	5.28398e-05	5.93576	ERK240min
Raph1	RAPH1		Ras association (RalGDS/AF-6) and pleckstrin homology domains 1	-1.60675	11.7934	-9.98363	1.1539e-06	5.28892e-05	5.93336	ERK240min
Farp1	FARP1	ENSMUST00000026635	FERM, RhoGEF (Arhgef) and pleckstrin domain protein 1 (chondrocyte-derived)	1.28891	9.3956	9.9757	1.16266e-06	5.30728e-05	5.92551	ERK240min
Rap2b	RAP2B	ENSMUST00000049064	RAP2B, member of RAS oncogene family	2.43542	7.42269	9.97565	1.16272e-06	5.30728e-05	5.92546	ERK240min
Irx2	IRX2	ENSMUST00000074372	Iroquois related homeobox 2 (Drosophila)	-1.79819	5.92561	-9.97421	1.16432e-06	5.30728e-05	5.92403	ERK240min
Aldh1b1	ALDH1B1	ENSMUST00000044384	aldehyde dehydrogenase 1 family, member B1	-4.25801	9.44623	-9.9726	1.16611e-06	5.30813e-05	5.92244	ERK240min
Wdfy3	WDFY3	ENSMUST00000104987	WD repeat and FYVE domain containing 3	-1.14796	7.43656	-9.96486	1.17477e-06	5.33286e-05	5.91477	ERK240min
Gm8104			predicted gene 8104	2.08267	5.44938	9.96297	1.17689e-06	5.33517e-05	5.9129	ERK240min
Rhou	RHOU		ras homolog gene family, member U	1.34677	9.48317	9.95475	1.18617e-06	5.3699e-05	5.90475	ERK240min
Zfp202	ZNF202		zinc finger protein 202	3.1742	3.78145	9.95069	1.19079e-06	5.38062e-05	5.90072	ERK240min
Arhgap36	ARHGAP36		Rho GTPase activating protein 36	-2.00395	4.7628	-9.9498	1.19179e-06	5.38062e-05	5.89984	ERK240min
Nf2	NF2	ENSMUST00000141342	neurofibromatosis 2	-1.3018	8.56043	-9.94526	1.19699e-06	5.39671e-05	5.89533	ERK240min
Fbln7	FBLN7		fibulin 7	-1.65834	6.00262	-9.93725	1.2062e-06	5.43085e-05	5.88738	ERK240min
Fzd10	FZD10	ENSMUST00000117102	frizzled homolog 10 (Drosophila)	-2.37538	10.7336	-9.92325	1.22248e-06	5.48921e-05	5.87347	ERK240min
Irf1	IRF1	ENSMUST00000108920	interferon regulatory factor 1	-2.39921	11.9032	-9.92031	1.22593e-06	5.48981e-05	5.87054	ERK240min
Plcl1	PLCL1	ENSMUST00000042986	phospholipase C-like 1	1.60363	2.09628	9.91809	1.22855e-06	5.49336e-05	5.86833	ERK240min
Radil	RADIL	ENSMUST00000139824	Ras association and DIL domains	-2.24192	8.89538	-9.91572	1.23134e-06	5.49336e-05	5.86597	ERK240min
Gli2	GLI2	ENSMUST00000062483	GLI-Kruppel family member GLI2	-3.83119	9.60331	-9.91541	1.2317e-06	5.49336e-05	5.86567	ERK240min
2310014H01Rik			RIKEN cDNA 2310014H01 gene	1.1551	7.51155	9.90288	1.24661e-06	5.55235e-05	5.85319	ERK240min
Tyro3	TYRO3	ENSMUST00000110783	TYRO3 protein tyrosine kinase 3	-2.02776	13.6915	-9.90109	1.24875e-06	5.55444e-05	5.8514	ERK240min
Slc44a4	SLC44A4		solute carrier family 44, member 4	1.30628	7.61825	9.89551	1.25546e-06	5.56931e-05	5.84584	ERK240min
Mppe1	MPPE1	ENSMUST00000073054	metallophosphoesterase 1	-2.38715	5.16534	-9.88908	1.26324e-06	5.5963e-05	5.83943	ERK240min
Krt76	KRT76		keratin 76	1.92477	2.68712	9.88413	1.26927e-06	5.60054e-05	5.83449	ERK240min
Npas1	NPAS1		neuronal PAS domain protein 1	2.80687	5.76331	9.87842	1.27626e-06	5.62387e-05	5.82879	ERK240min
Trib2	TRIB2	ENSMUST00000151100	tribbles homolog 2 (Drosophila)	1.38007	2.10136	9.87654	1.27858e-06	5.62659e-05	5.82691	ERK240min
Epb4.1l3	EPB41L3	ENSMUST00000024843	erythrocyte protein band 4.1-like 3	-1.95254	10.0152	-9.87183	1.28439e-06	5.63716e-05	5.8222	ERK240min
Elovl7	ELOVL7	ENSMUST00000022207	ELOVL family member 7, elongation of long chain fatty acids (yeast)	-1.37341	9.98497	-9.86853	1.28847e-06	5.64024e-05	5.81891	ERK240min
Plek2	PLEK2	ENSMUST00000021544	pleckstrin 2	1.8598	6.80074	9.86851	1.2885e-06	5.64024e-05	5.81889	ERK240min
Upb1	UPB1		ureidopropionase, beta	2.24774	6.76929	9.86447	1.29351e-06	5.64726e-05	5.81485	ERK240min
Rgs2	RGS2	ENSMUST00000027606	regulator of G-protein signaling 2	2.39577	7.60184	9.86245	1.29604e-06	5.65082e-05	5.81283	ERK240min
Htatip2	HTATIP2		HIV-1 tat interactive protein 2, homolog (human)	1.35721	6.70138	9.86019	1.29887e-06	5.65571e-05	5.81057	ERK240min
Hoxc13	HOXC13	ENSMUST00000001700	homeobox C13	-3.52579	6.28727	-9.85748	1.30226e-06	5.66304e-05	5.80786	ERK240min
Akap14	AKAP14	ENSMUST00000046557	A kinase (PRKA) anchor protein 14	4.15234	2.7428	9.85569	1.3045e-06	5.66534e-05	5.80607	ERK240min
Fhit	FHIT	ENSMUST00000079984	fragile histidine triad gene	2.44289	5.25245	9.84985	1.31188e-06	5.68991e-05	5.80022	ERK240min
Rab30	RAB30	ENSMUST00000107180	RAB30, member RAS oncogene family	-2.34412	7.44362	-9.84308	1.32047e-06	5.71966e-05	5.79344	ERK240min
Lat	LAT	ENSMUST00000032997	linker for activation of T cells	1.48509	7.69249	9.84143	1.32258e-06	5.72131e-05	5.79179	ERK240min
Gipc2	GIPC2	ENSMUST00000152680	GIPC PDZ domain containing family, member 2	2.12917	6.47026	9.83768	1.32737e-06	5.73017e-05	5.78803	ERK240min
Fam196a	FAM196A		family with sequence similarity 196, member A	2.84047	6.37985	9.83457	1.33136e-06	5.73682e-05	5.78491	ERK240min
Fam19a4	FAM19A4		family with sequence similarity 19, member A4	4.11988	3.14301	9.83165	1.33512e-06	5.74554e-05	5.78198	ERK240min
Iqgap2	IQGAP2	ENSMUST00000068603	IQ motif containing GTPase activating protein 2	-1.53338	6.74416	-9.82633	1.342e-06	5.76764e-05	5.77665	ERK240min
Cldn5	CLDN5	ENSMUST00000043577	claudin 5	1.80339	6.82915	9.82335	1.34587e-06	5.77678e-05	5.77366	ERK240min
Tsx			testis specific X-linked gene	2.04506	6.51477	9.82058	1.34948e-06	5.78477e-05	5.77088	ERK240min
Fgg	FGG	ENSMUST00000048486	fibrinogen gamma chain	-2.50019	6.49746	-9.80611	1.3685e-06	5.8474e-05	5.75635	ERK240min
Gpr126	GPR126		G protein-coupled receptor 126	-1.93839	4.14811	-9.80544	1.36939e-06	5.8474e-05	5.75567	ERK240min
Anxa5	ANXA5	ENSMUST00000029266	annexin A5	1.68031	10.3628	9.79494	1.38338e-06	5.89192e-05	5.74512	ERK240min
Gucy1a2	GUCY1A2	ENSMUST00000086620	guanylate cyclase 1, soluble, alpha 2	-1.64552	4.4504	-9.78471	1.39717e-06	5.93033e-05	5.73482	ERK240min
Atp4a	ATP4A		ATPase, H+/K+ exchanging, gastric, alpha polypeptide	1.89201	5.12936	9.78467	1.39723e-06	5.93033e-05	5.73477	ERK240min
Ddah1	DDAH1	ENSMUST00000127193	dimethylarginine dimethylaminohydrolase 1	1.36886	9.6013	9.78304	1.39944e-06	5.93033e-05	5.73313	ERK240min
Arhgef5	ARHGEF5		Rho guanine nucleotide exchange factor (GEF) 5	2.20748	8.30741	9.77051	1.41655e-06	5.98609e-05	5.72051	ERK240min
Tff1	TFF1	ENSMUST00000024831	trefoil factor 1	2.30406	2.28231	9.76935	1.41815e-06	5.98609e-05	5.71934	ERK240min
Rasgef1a	RASGEF1A	ENSMUST00000032230	RasGEF domain family, member 1A	-4.90466	8.97542	-9.7623	1.4279e-06	6.01944e-05	5.71222	ERK240min
Cysltr1	CYSLTR1		cysteinyl leukotriene receptor 1	1.91586	2.37897	9.76101	1.42969e-06	6.01944e-05	5.71092	ERK240min
Tinagl1	TINAGL1	ENSMUST00000061267	tubulointerstitial nephritis antigen-like 1	1.82809	6.11177	9.75967	1.43154e-06	6.01958e-05	5.70957	ERK240min
Ccdc122	CCDC122		coiled-coil domain containing 122	2.52919	2.61272	9.75401	1.43944e-06	6.04512e-05	5.70386	ERK240min
Afap1l1	AFAP1L1	ENSMUST00000147278	actin filament associated protein 1-like 1	2.09748	7.0567	9.75183	1.4425e-06	6.05028e-05	5.70165	ERK240min
Filip1l	FILIP1L	ENSMUST00000057595	filamin A interacting protein 1-like	4.42215	6.06485	9.74984	1.44529e-06	6.0543e-05	5.69965	ERK240min
Atp2a3	ATP2A3	ENSMUST00000021142	ATPase, Ca++ transporting, ubiquitous	-1.97665	8.88675	-9.74397	1.45357e-06	6.07384e-05	5.69371	ERK240min
Cpt1a	CPT1A		carnitine palmitoyltransferase 1a, liver	-2.00031	11.8969	-9.74358	1.45413e-06	6.07384e-05	5.69332	ERK240min
Fam49a	FAM49A		family with sequence similarity 49, member A	2.24961	6.67036	9.74263	1.45546e-06	6.07384e-05	5.69236	ERK240min
1810011O10Rik	C8orf4		RIKEN cDNA 1810011O10 gene	2.89871	5.90856	9.73222	1.47029e-06	6.12802e-05	5.68183	ERK240min
Lrp8	LRP8	ENSMUST00000123140	low density lipoprotein receptor-related protein 8, apolipoprotein e receptor	3.44933	3.49119	9.7254	1.48009e-06	6.16108e-05	5.67493	ERK240min
Wt1	WT1	ENSMUST00000143043	Wilms tumor 1 homolog	3.04305	7.75006	9.72253	1.48425e-06	6.17063e-05	5.67202	ERK240min
Daf2	CD55		decay accelerating factor 2	-2.08804	7.89961	-9.72096	1.48652e-06	6.17232e-05	5.67043	ERK240min
Cd248	CD248		CD248 antigen, endosialin	-2.14556	6.48311	-9.71505	1.49511e-06	6.19208e-05	5.66444	ERK240min
Ccrn4l	CCRN4L	ENSMUST00000023849	CCR4 carbon catabolite repression 4-like (S. cerevisiae)	2.32595	13.3718	9.71383	1.49689e-06	6.19208e-05	5.6632	ERK240min
Cyp11a1	CYP11A1	ENSMUST00000034874	cytochrome P450, family 11, subfamily a, polypeptide 1	3.28719	5.03749	9.70363	1.51186e-06	6.23091e-05	5.65286	ERK240min
Rnf183	RNF183	ENSMUST00000107454	ring finger protein 183	4.43594	3.05132	9.70314	1.51259e-06	6.23091e-05	5.65236	ERK240min
Bmp7	BMP7		bone morphogenetic protein 7	-2.13562	8.24067	-9.70202	1.51424e-06	6.23091e-05	5.65123	ERK240min
Rasgrp1	RASGRP1	ENSMUST00000028823	RAS guanyl releasing protein 1	-2.33427	8.10457	-9.70104	1.51569e-06	6.23091e-05	5.65023	ERK240min
Tgm1	TGM1	ENSMUST00000002389	transglutaminase 1, K polypeptide	-1.61361	10.9275	-9.69351	1.52688e-06	6.2659e-05	5.64259	ERK240min
Nckap1l	NCKAP1L	ENSMUST00000047405	NCK associated protein 1 like	-1.08518	8.65814	-9.69032	1.53165e-06	6.2659e-05	5.63935	ERK240min
Gadd45a	GADD45A	ENSMUST00000043098	growth arrest and DNA-damage-inducible 45 alpha	2.73586	10.9474	9.69023	1.53178e-06	6.2659e-05	5.63927	ERK240min
Trps1	TRPS1		trichorhinophalangeal syndrome I (human)	-1.6447	8.89334	-9.68409	1.54101e-06	6.29522e-05	5.63302	ERK240min
Insc	INSC	ENSMUST00000106620	inscuteable homolog (Drosophila)	5.13512	5.51492	9.68025	1.54681e-06	6.30399e-05	5.62912	ERK240min
1110003E01Rik		ENSMUST00000135258	RIKEN cDNA 1110003E01 gene	-1.12557	10.9491	-9.67784	1.55046e-06	6.31112e-05	5.62667	ERK240min
Hdgfrp3		ENSMUST00000107305	hepatoma-derived growth factor, related protein 3	2.19481	6.04576	9.6738	1.55659e-06	6.32052e-05	5.62257	ERK240min
Necab2	NECAB2		N-terminal EF-hand calcium binding protein 2	2.25892	10.0071	9.66902	1.56389e-06	6.32689e-05	5.6177	ERK240min
Ero1lb	ERO1LB	ENSMUST00000071973	ERO1-like beta (S. cerevisiae)	-1.27105	7.97768	-9.66725	1.5666e-06	6.33011e-05	5.6159	ERK240min
AI464131	KIAA1161	ENSMUST00000054920	expressed sequence AI464131	-2.48658	8.24676	-9.66082	1.57651e-06	6.34038e-05	5.60935	ERK240min
Slc30a4	SLC30A4	ENSMUST00000005952	solute carrier family 30 (zinc transporter), member 4	1.6457	7.90089	9.6598	1.57809e-06	6.34038e-05	5.60831	ERK240min
Esrrb	ESRRB	ENSMUST00000021680	estrogen related receptor, beta	-2.03672	16.0124	-9.65939	1.57872e-06	6.34038e-05	5.60789	ERK240min
Pip4k2a	PIP4K2A	ENSMUST00000114642	phosphatidylinositol-5-phosphate 4-kinase, type II, alpha	-1.97143	6.48888	-9.65405	1.58701e-06	6.36592e-05	5.60245	ERK240min
Plcb4	PLCB4	ENSMUST00000110109	phospholipase C, beta 4	1.78952	10.8688	9.64674	1.59843e-06	6.40398e-05	5.595	ERK240min
Leprot	LEPROT	ENSMUST00000106927	leptin receptor overlapping transcript	-1.28765	12.8641	-9.64255	1.60501e-06	6.42254e-05	5.59073	ERK240min
Zfp628	ZNF628	ENSMUST00000116354	zinc finger protein 628	-1.15203	9.73667	-9.63698	1.61381e-06	6.43833e-05	5.58505	ERK240min
Thy1	THY1	ENSMUST00000114840	thymus cell antigen 1, theta	2.15087	11.1074	9.63636	1.61479e-06	6.43833e-05	5.58442	ERK240min
Susd2	SUSD2	ENSMUST00000077610	sushi domain containing 2	-2.63773	9.46314	-9.62778	1.62845e-06	6.48501e-05	5.57566	ERK240min
Cdx2	CDX2	ENSMUST00000031650	caudal type homeobox 2	4.1794	5.20531	9.62231	1.63724e-06	6.49653e-05	5.57006	ERK240min
C030039L03Rik	ZNF780A		RIKEN cDNA C030039L03 gene	-2.90666	8.89476	-9.62037	1.64036e-06	6.50111e-05	5.56809	ERK240min
Zfp292	ZNF292	ENSMUST00000047950	zinc finger protein 292	-1.36676	10.5939	-9.61576	1.64781e-06	6.51506e-05	5.56337	ERK240min
Calcoco2	CALCOCO2	ENSMUST00000097162	calcium binding and coiled-coil domain 2	-4.62321	10.7447	-9.6087	1.65929e-06	6.54327e-05	5.55615	ERK240min
Itm2a	ITM2A		integral membrane protein 2A	-1.80155	10.2588	-9.60755	1.66118e-06	6.54327e-05	5.55497	ERK240min
Rpe65	RPE65		retinal pigment epithelium 65	1.77233	4.4615	9.60582	1.66401e-06	6.54327e-05	5.5532	ERK240min
Tex21			testis expressed gene 21	2.15435	5.95285	9.60372	1.66745e-06	6.54327e-05	5.55105	ERK240min
Mll5		ENSMUST00000056291	myeloid/lymphoid or mixed-lineage leukemia 5	-1.38362	9.27905	-9.60292	1.66876e-06	6.54327e-05	5.55023	ERK240min
Timp3	TIMP3	ENSMUST00000020234	tissue inhibitor of metalloproteinase 3	1.71942	7.57222	9.60291	1.66879e-06	6.54327e-05	5.55022	ERK240min
Cxcl12	CXCL12	ENSMUST00000112866	chemokine (C-X-C motif) ligand 12	-2.2956	3.54844	-9.59014	1.68991e-06	6.61826e-05	5.53714	ERK240min
Anp32a	ANP32A	ENSMUST00000085519	acidic (leucine-rich) nuclear phosphoprotein 32 family, member A	-1.48094	14.1749	-9.58501	1.69848e-06	6.6283e-05	5.53188	ERK240min
Dusp6	DUSP6	ENSMUST00000020118	dual specificity phosphatase 6	3.64887	13.1484	9.57608	1.71351e-06	6.67905e-05	5.52272	ERK240min
Gnmt	GNMT	ENSMUST00000002846	glycine N-methyltransferase	1.52136	7.93703	9.5724	1.71975e-06	6.69548e-05	5.51894	ERK240min
Aldh5a1	ALDH5A1	ENSMUST00000037615	aldhehyde dehydrogenase family 5, subfamily A1	1.22405	11.3566	9.56887	1.72576e-06	6.71098e-05	5.51532	ERK240min
Tmem57	TMEM57	ENSMUST00000150031	transmembrane protein 57	1.74927	12.0546	9.56765	1.72783e-06	6.71117e-05	5.51407	ERK240min
Usp13	USP13	ENSMUST00000072312	ubiquitin specific peptidase 13 (isopeptidase T-3)	-1.88207	7.91599	-9.55511	1.74938e-06	6.77894e-05	5.50118	ERK240min
Col9a2	COL9A2	ENSMUST00000030372	collagen, type IX, alpha 2	-2.49555	10.4257	-9.55253	1.75385e-06	6.7883e-05	5.49852	ERK240min
Bst2	BST2	ENSMUST00000051672	bone marrow stromal cell antigen 2	1.91674	12.0026	9.54828	1.76123e-06	6.80647e-05	5.49416	ERK240min
Rgs17	RGS17	ENSMUST00000117676	regulator of G-protein signaling 17	1.69463	6.66663	9.54709	1.7633e-06	6.80647e-05	5.49293	ERK240min
Fancc	FANCC	ENSMUST00000021916	Fanconi anemia, complementation group C	-1.09064	7.21171	-9.54629	1.76471e-06	6.80647e-05	5.4921	ERK240min
Nanog	NANOG	ENSMUST00000012540	Nanog homeobox	-3.91683	15.5819	-9.52488	1.80253e-06	6.93617e-05	5.47005	ERK240min
Lpl	LPL	ENSMUST00000015712	lipoprotein lipase	-2.43603	9.35554	-9.52198	1.80771e-06	6.94805e-05	5.46706	ERK240min
Gpr114	GPR114		G protein-coupled receptor 114	-4.28709	7.12937	-9.5201	1.81108e-06	6.95291e-05	5.46512	ERK240min
Igsf1	IGSF1	ENSMUST00000088847	immunoglobulin superfamily, member 1	-1.42599	8.90676	-9.51745	1.81585e-06	6.96313e-05	5.46239	ERK240min
Tmem144	TMEM144		transmembrane protein 144	-1.51948	8.75595	-9.50722	1.83437e-06	7.02603e-05	5.45183	ERK240min
Cdh4	CDH4		cadherin 4	2.8119	5.98492	9.49078	1.86458e-06	7.12525e-05	5.43484	ERK240min
Enoph1	ENOPH1	ENSMUST00000031268	enolase-phosphatase 1	-1.74928	13.4246	-9.48883	1.8682e-06	7.13083e-05	5.43282	ERK240min
Steap2	STEAP2	ENSMUST00000115425	six transmembrane epithelial antigen of prostate 2	2.17722	8.7687	9.48448	1.8763e-06	7.1535e-05	5.42832	ERK240min
Tmem53	TMEM53		transmembrane protein 53	-1.08563	8.57196	-9.48226	1.88046e-06	7.16109e-05	5.42602	ERK240min
9030617O03Rik	C14orf159	ENSMUST00000110069	RIKEN cDNA 9030617O03 gene	-3.20681	7.33852	-9.47322	1.89744e-06	7.21657e-05	5.41666	ERK240min
Car9	CA9	ENSMUST00000107917	carbonic anhydrase 9	1.59741	5.74967	9.47219	1.89938e-06	7.21657e-05	5.4156	ERK240min
Lrrc51			leucine rich repeat containing 51	1.89637	6.68643	9.46806	1.90722e-06	7.23207e-05	5.41131	ERK240min
Slc35f1	SLC35F1		solute carrier family 35, member F1	4.90488	4.12018	9.46619	1.91078e-06	7.23207e-05	5.40937	ERK240min
Fam81a	FAM81A		family with sequence similarity 81, member A	-3.15795	7.81082	-9.46606	1.91103e-06	7.23207e-05	5.40924	ERK240min
Pdlim4	PDLIM4	ENSMUST00000018755	PDZ and LIM domain 4	-4.5132	10.8353	-9.46544	1.91221e-06	7.23207e-05	5.40859	ERK240min
Acot3	ACOT1	ENSMUST00000021653	acyl-CoA thioesterase 3	-2.26761	6.87127	-9.46362	1.91568e-06	7.23692e-05	5.40671	ERK240min
Zmat5	ZMAT5	ENSMUST00000154341	zinc finger, matrin type 5	-1.49982	10.4315	-9.46214	1.91849e-06	7.2393e-05	5.40518	ERK240min
Ovol1	OVOL1	ENSMUST00000025861	OVO homolog-like 1 (Drosophila)	4.6324	6.32389	9.46017	1.92228e-06	7.24532e-05	5.40313	ERK240min
Wbscr27	WBSCR27	ENSMUST00000111218	Williams Beuren syndrome chromosome region 27 (human)	-1.02795	11.3223	-9.45428	1.9336e-06	7.27969e-05	5.39702	ERK240min
Cdkn1b	CDKN1B	ENSMUST00000100855	cyclin-dependent kinase inhibitor 1B	-1.27151	11.611	-9.45249	1.93705e-06	7.2844e-05	5.39516	ERK240min
Hmgn3	HMGN3	ENSMUST00000159760	high mobility group nucleosomal binding domain 3	1.38426	7.0489	9.44206	1.95731e-06	7.35225e-05	5.38433	ERK240min
Nod1	NOD1	ENSMUST00000060655	nucleotide-binding oligomerization domain containing 1	-2.00298	8.2645	-9.43563	1.96992e-06	7.38672e-05	5.37765	ERK240min
Tesk2	TESK2	ENSMUST00000106457	testis-specific kinase 2	-1.41457	10.6327	-9.4341	1.97293e-06	7.38672e-05	5.37606	ERK240min
Krt79	KRT79		keratin 79	-1.48009	8.85502	-9.43397	1.97318e-06	7.38672e-05	5.37593	ERK240min
Gm364		ENSMUST00000114725	predicted gene 364	2.78358	5.00319	9.42562	1.98973e-06	7.44023e-05	5.36724	ERK240min
Fam129a	FAM129A	ENSMUST00000097541	family with sequence similarity 129, member A	1.34022	10.3193	9.42295	1.99504e-06	7.45167e-05	5.36446	ERK240min
Srsf6	SRSF6	ENSMUST00000017065	serine/arginine-rich splicing factor 6	-1.24632	13.5743	-9.41976	2.00142e-06	7.46707e-05	5.36114	ERK240min
Baz2b	BAZ2B		bromodomain adjacent to zinc finger domain, 2B	-1.27549	10.0233	-9.4123	2.0164e-06	7.51451e-05	5.35337	ERK240min
Fxyd4	FXYD4	ENSMUST00000005114	FXYD domain-containing ion transport regulator 4	-2.40749	9.43816	-9.41015	2.02076e-06	7.51496e-05	5.35113	ERK240min
Ubash3b	UBASH3B	ENSMUST00000044155	ubiquitin associated and SH3 domain containing, B	2.48546	7.1149	9.40798	2.02514e-06	7.52165e-05	5.34888	ERK240min
A430105I19Rik	C15orf52		RIKEN cDNA A430105I19 gene	1.55314	6.57679	9.39489	2.05188e-06	7.60829e-05	5.33522	ERK240min
Elf3	ELF3	ENSMUST00000003135	E74-like factor 3	-2.51303	9.25617	-9.39182	2.05821e-06	7.61719e-05	5.33201	ERK240min
Slc29a3	SLC29A3	ENSMUST00000117513	solute carrier family 29 (nucleoside transporters), member 3	-1.80072	7.26596	-9.39092	2.06007e-06	7.61719e-05	5.33107	ERK240min
Ttl	TTL	ENSMUST00000035812	tubulin tyrosine ligase	-1.06741	10.5493	-9.38402	2.07436e-06	7.65721e-05	5.32388	ERK240min
Spry4	SPRY4		sprouty homolog 4 (Drosophila)	4.57668	9.23249	9.38347	2.07552e-06	7.65721e-05	5.32329	ERK240min
D18Ertd653e			DNA segment, Chr 18, ERATO Doi 653, expressed	-1.61323	6.57244	-9.38055	2.08161e-06	7.67112e-05	5.32024	ERK240min
Zic3	ZIC3	ENSMUST00000088627	zinc finger protein of the cerebellum 3	1.44317	13.7931	9.37849	2.08591e-06	7.67624e-05	5.3181	ERK240min
Mark4	MARK4	ENSMUST00000085715	MAP/microtubule affinity-regulating kinase 4	-1.49338	11.089	-9.37664	2.08979e-06	7.67624e-05	5.31616	ERK240min
Ttc9	TTC9		tetratricopeptide repeat domain 9	2.19041	4.67127	9.37656	2.08996e-06	7.67624e-05	5.31608	ERK240min
Gpc3	GPC3	ENSMUST00000069360	glypican 3	-1.9836	10.5854	-9.37133	2.10096e-06	7.70397e-05	5.31061	ERK240min
Msra	MSRA	ENSMUST00000089333	methionine sulfoxide reductase A	-1.25672	10.5787	-9.37076	2.10216e-06	7.70397e-05	5.31001	ERK240min
Ablim1	ABLIM1		actin-binding LIM protein 1	-2.79678	7.12466	-9.36591	2.11242e-06	7.73301e-05	5.30495	ERK240min
Fxyd6	FXYD6	ENSMUST00000085939	FXYD domain-containing ion transport regulator 6	-1.88514	16.5527	-9.35804	2.1292e-06	7.78582e-05	5.29671	ERK240min
Fndc3b	FNDC3B	ENSMUST00000046157	fibronectin type III domain containing 3B	-1.68454	8.42151	-9.34697	2.15305e-06	7.86432e-05	5.28511	ERK240min
Tsc22d1	TSC22D1	ENSMUST00000088906	TSC22 domain family, member 1	1.03098	13.6613	9.34436	2.1587e-06	7.86638e-05	5.28238	ERK240min
Tmem59l	TMEM59L	ENSMUST00000045286	transmembrane protein 59-like	3.29591	9.72277	9.34077	2.16653e-06	7.86638e-05	5.27861	ERK240min
Fbln1	FBLN1		fibulin 1	-1.66916	7.39619	-9.34053	2.16705e-06	7.86638e-05	5.27836	ERK240min
Gabra4	GABRA4	ENSMUST00000031121	gamma-aminobutyric acid (GABA) A receptor, subunit alpha 4	2.19904	2.62495	9.34044	2.16724e-06	7.86638e-05	5.27827	ERK240min
Txlnb	TXLNB	ENSMUST00000037964	taxilin beta	-1.44642	4.8732	-9.34015	2.16787e-06	7.86638e-05	5.27797	ERK240min
Ddah2	DDAH2	ENSMUST00000007255	dimethylarginine dimethylaminohydrolase 2	-1.19218	14.4212	-9.33782	2.17298e-06	7.87629e-05	5.27551	ERK240min
Kctd11	KCTD11	ENSMUST00000050555	potassium channel tetramerisation domain containing 11	1.73257	7.58822	9.33505	2.17904e-06	7.88961e-05	5.27261	ERK240min
Fhl1	FHL1	ENSMUST00000114772	four and a half LIM domains 1	-1.61482	6.58043	-9.32772	2.19522e-06	7.93872e-05	5.26491	ERK240min
Tlx2	TLX2	ENSMUST00000089641	T-cell leukemia, homeobox 2	-2.61176	5.00519	-9.32673	2.1974e-06	7.93872e-05	5.26388	ERK240min
Atp6v0a4	ATP6V0A4	ENSMUST00000114908	ATPase, H+ transporting, lysosomal V0 subunit A4	-2.71821	10.3139	-9.3209	2.21034e-06	7.95875e-05	5.25776	ERK240min
Gstm1	GSTM5	ENSMUST00000004140	glutathione S-transferase, mu 1	-1.59016	12.7128	-9.31883	2.21497e-06	7.95875e-05	5.25558	ERK240min
Hey1	HEY1	ENSMUST00000042412	hairy/enhancer-of-split related with YRPW motif 1	-2.1773	7.94107	-9.31296	2.22814e-06	7.9887e-05	5.24941	ERK240min
D14Ertd668e		ENSMUST00000089448	DNA segment, Chr 14, ERATO Doi 668, expressed	-1.53954	13.207	-9.31098	2.23258e-06	7.99598e-05	5.24733	ERK240min
Ppap2a	PPAP2A	ENSMUST00000070951	phosphatidic acid phosphatase type 2A	-2.4724	6.61189	-9.30492	2.24631e-06	8.03644e-05	5.24095	ERK240min
Ccdc64b	CCDC64B		coiled-coil domain containing 64B	2.56621	7.70741	9.29959	2.25843e-06	8.07107e-05	5.23535	ERK240min
Tubb2b	TUBB2B		tubulin, beta 2B	-2.59826	12.3332	-9.29849	2.26093e-06	8.07129e-05	5.23419	ERK240min
Hist1h2bp	HIST1H2BO	ENSMUST00000110473	histone cluster 1, H2bp	-1.24207	6.69026	-9.29726	2.26375e-06	8.07265e-05	5.2329	ERK240min
Defb42	DEFB136		defensin beta 42	-2.9011	6.98678	-9.29509	2.26872e-06	8.08167e-05	5.23061	ERK240min
Bmp1	BMP1	ENSMUST00000072686	bone morphogenetic protein 1	2.1482	8.49753	9.28336	2.2958e-06	8.16934e-05	5.21825	ERK240min
Apobr	APOBR		apolipoprotein B receptor	1.24826	7.81533	9.2805	2.30246e-06	8.18232e-05	5.21523	ERK240min
Lor		ENSMUST00000058150	loricrin	2.68006	8.84472	9.27618	2.31254e-06	8.18232e-05	5.21068	ERK240min
Vstm2l	VSTM2L	ENSMUST00000047411	V-set and transmembrane domain containing 2-like	-2.74028	7.13408	-9.27564	2.31382e-06	8.18232e-05	5.21011	ERK240min
Adrb1	ADRB1		adrenergic receptor, beta 1	3.2345	5.51086	9.2754	2.31439e-06	8.18232e-05	5.20985	ERK240min
Mfsd1	MFSD1		major facilitator superfamily domain containing 1	-1.08062	10.8246	-9.2738	2.31812e-06	8.18232e-05	5.20817	ERK240min
Lrrc43	LRRC43		leucine rich repeat containing 43	2.30843	2.57365	9.27333	2.31923e-06	8.18232e-05	5.20768	ERK240min
Cd59b	CD59	ENSMUST00000090429	CD59b antigen	-1.69678	5.41382	-9.27005	2.32695e-06	8.19096e-05	5.20421	ERK240min
Lass3			LAG1 homolog, ceramide synthase 3	2.83185	5.78988	9.26916	2.32905e-06	8.19096e-05	5.20327	ERK240min
Siah2	SIAH2	ENSMUST00000099089	seven in absentia 2	1.64213	6.70331	9.26257	2.34466e-06	8.21505e-05	5.19631	ERK240min
Napsa	NAPSA	ENSMUST00000002274	napsin A aspartic peptidase	-2.02766	9.49284	-9.2614	2.34744e-06	8.21505e-05	5.19508	ERK240min
LOC100505237			calcium-binding and coiled-coil domain-containing protein 2-like	-3.68661	8.99978	-9.2613	2.34769e-06	8.21505e-05	5.19497	ERK240min
Zfp423	ZNF423	ENSMUST00000109655	zinc finger protein 423	2.92477	8.77614	9.26101	2.34836e-06	8.21505e-05	5.19467	ERK240min
Peli2	PELI2	ENSMUST00000073150	pellino 2	-2.19566	5.89601	-9.25936	2.35231e-06	8.22018e-05	5.19292	ERK240min
Igfbp2	IGFBP2	ENSMUST00000080287	insulin-like growth factor binding protein 2	-1.61573	14.0211	-9.25798	2.3556e-06	8.22297e-05	5.19146	ERK240min
Nkain4	NKAIN4		Na+/K+ transporting ATPase interacting 4	-3.88396	8.21033	-9.24191	2.39434e-06	8.34062e-05	5.17447	ERK240min
Zfyve28	ZFYVE28	ENSMUST00000094868	zinc finger, FYVE domain containing 28	-3.65043	6.92134	-9.23341	2.4151e-06	8.39525e-05	5.16547	ERK240min
1810031K17Rik			RIKEN cDNA 1810031K17 gene	1.34762	11.5311	9.23231	2.41781e-06	8.39587e-05	5.1643	ERK240min
B4galnt1	B4GALNT1		beta-1,4-N-acetyl-galactosaminyl transferase 1	1.97541	6.69669	9.23037	2.42258e-06	8.40361e-05	5.16225	ERK240min
Chst3	CHST3	ENSMUST00000068690	carbohydrate (chondroitin 6/keratan) sulfotransferase 3	-2.34743	7.13923	-9.22904	2.42585e-06	8.40613e-05	5.16085	ERK240min
Fancm	FANCM	ENSMUST00000058889	Fanconi anemia, complementation group M	-1.32189	10.118	-9.22566	2.4342e-06	8.42003e-05	5.15726	ERK240min
Atp2b2	ATP2B2	ENSMUST00000101044	ATPase, Ca++ transporting, plasma membrane 2	-2.35218	6.30334	-9.22398	2.43837e-06	8.42306e-05	5.15548	ERK240min
Snapc3	SNAPC3	ENSMUST00000030206	small nuclear RNA activating complex, polypeptide 3	1.59142	10.5671	9.21795	2.45337e-06	8.46606e-05	5.14909	ERK240min
Sema7a	SEMA7A	ENSMUST00000043059	sema domain, immunoglobulin domain (Ig), and GPI membrane anchor, (semaphorin) 7A	1.44903	8.81406	9.21524	2.46016e-06	8.48064e-05	5.14621	ERK240min
Tmem151b	TMEM151B	ENSMUST00000052694	transmembrane protein 151B	-1.32506	9.14538	-9.21415	2.46287e-06	8.48114e-05	5.14506	ERK240min
Gm3515			predicted gene 3515	1.84616	2.1525	9.21305	2.46563e-06	8.48184e-05	5.14389	ERK240min
Decr1	DECR1	ENSMUST00000029877	2,4-dienoyl CoA reductase 1, mitochondrial	-1.29595	12.6246	-9.20911	2.47556e-06	8.50714e-05	5.13971	ERK240min
Duxbl			double homeobox B-like	-2.45876	4.95675	-9.2011	2.49584e-06	8.54854e-05	5.1312	ERK240min
BC061212		ENSMUST00000092582	cDNA sequence BC061212	-2.02534	4.41587	-9.20027	2.49794e-06	8.54854e-05	5.13033	ERK240min
Lrrc8b	LRRC8B	ENSMUST00000112707	leucine rich repeat containing 8 family, member B	1.42596	7.13434	9.19764	2.50466e-06	8.56268e-05	5.12753	ERK240min
4933439C10Rik		ENSMUST00000145533	RIKEN cDNA 4933439C10 gene	1.39126	5.85522	9.19449	2.51273e-06	8.57458e-05	5.12418	ERK240min
Dyrk1b	DYRK1B	ENSMUST00000085901	dual-specificity tyrosine-(Y)-phosphorylation regulated kinase 1b	-1.61811	7.28561	-9.19324	2.51592e-06	8.57458e-05	5.12285	ERK240min
Lypd6b	LYPD6B		LY6/PLAUR domain containing 6B	1.96381	6.60105	9.18654	2.53317e-06	8.62451e-05	5.11573	ERK240min
Jdp2	JDP2	ENSMUST00000050687	Jun dimerization protein 2	-1.51464	9.17651	-9.18354	2.54096e-06	8.64214e-05	5.11253	ERK240min
Themis	THEMIS	ENSMUST00000105515	thymocyte selection associated	3.29465	4.23057	9.17041	2.57524e-06	8.72302e-05	5.09856	ERK240min
Tmem125	TMEM125		transmembrane protein 125	1.92677	10.6364	9.17015	2.57593e-06	8.72302e-05	5.09828	ERK240min
LOC100044438			hypothetical LOC100044438	3.16931	6.71637	9.1694	2.57792e-06	8.72302e-05	5.09748	ERK240min
Klf2	KLF2	ENSMUST00000067912	Kruppel-like factor 2 (lung)	-1.62455	15.0125	-9.16759	2.58269e-06	8.73023e-05	5.09555	ERK240min
D16Ertd472e	C21orf91		DNA segment, Chr 16, ERATO Doi 472, expressed	1.36465	10.0537	9.1599	2.60307e-06	8.77223e-05	5.08736	ERK240min
Zbp1	ZBP1	ENSMUST00000109116	Z-DNA binding protein 1	-2.23369	7.09814	-9.145	2.64308e-06	8.87993e-05	5.07146	ERK240min
Dtx1	DTX1	ENSMUST00000145174	deltex 1 homolog (Drosophila)	-2.41847	11.9377	-9.1415	2.65256e-06	8.90276e-05	5.06773	ERK240min
Nid1	NID1	ENSMUST00000005532	nidogen 1	-1.84027	13.3601	-9.13722	2.66423e-06	8.92381e-05	5.06315	ERK240min
Robo4	ROBO4	ENSMUST00000063237	roundabout homolog 4 (Drosophila)	3.35843	8.87361	9.1347	2.67111e-06	8.93141e-05	5.06046	ERK240min
Liph	LIPH		lipase, member H	2.07343	9.46324	9.13431	2.67219e-06	8.93141e-05	5.06004	ERK240min
Tmem20		ENSMUST00000054098	transmembrane protein 20	-1.88302	10.3709	-9.12768	2.69043e-06	8.97525e-05	5.05295	ERK240min
Pnpla3	PNPLA3	ENSMUST00000045289	patatin-like phospholipase domain containing 3	-1.98853	5.89655	-9.12287	2.70372e-06	9.00144e-05	5.04781	ERK240min
Crygc	CRYGC	ENSMUST00000114063	crystallin, gamma C	-1.50083	5.34747	-9.11414	2.72806e-06	9.07335e-05	5.03846	ERK240min
A2m	A2M	ENSMUST00000032203	alpha-2-macroglobulin	-2.35575	5.77307	-9.10716	2.74769e-06	9.11302e-05	5.03099	ERK240min
Cd1d1	CD1D	ENSMUST00000029717	CD1d1 antigen	-1.6592	9.44593	-9.1042	2.75608e-06	9.12981e-05	5.02781	ERK240min
Pof1b	POF1B		premature ovarian failure 1B	-1.82832	6.72482	-9.09741	2.77539e-06	9.16148e-05	5.02053	ERK240min
Lrrc34	LRRC34		leucine rich repeat containing 34	-3.03049	11.6702	-9.09157	2.79211e-06	9.20313e-05	5.01426	ERK240min
Trim67	TRIM67	ENSMUST00000041106	tripartite motif-containing 67	-3.65292	6.73638	-9.08613	2.80777e-06	9.22598e-05	5.00843	ERK240min
2010111I01Rik	C9orf3		RIKEN cDNA 2010111I01 gene	-2.22762	8.2902	-9.08461	2.81219e-06	9.22598e-05	5.00679	ERK240min
Pou3f1	POU3F1	ENSMUST00000105033	POU domain, class 3, transcription factor 1	3.22352	10.6279	9.08442	2.81272e-06	9.22598e-05	5.0066	ERK240min
Rax	RAX	ENSMUST00000025396	retina and anterior neural fold homeobox	-3.98524	6.51586	-9.08389	2.81427e-06	9.22598e-05	5.00602	ERK240min
Tmcc3	TMCC3		transmembrane and coiled coil domains 3	2.03914	8.34125	9.08337	2.81577e-06	9.22598e-05	5.00547	ERK240min
Klk1b8	KLK1		kallikrein 1-related peptidase b8	-1.72531	8.13162	-9.0812	2.82207e-06	9.23745e-05	5.00314	ERK240min
Add3	ADD3		adducin 3 (gamma)	-2.2218	9.89418	-9.08019	2.82502e-06	9.238e-05	5.00204	ERK240min
Gm5101			predicted gene 5101	-1.63402	6.43689	-9.0687	2.85866e-06	9.32037e-05	4.9897	ERK240min
Tdrd5	TDRD5		tudor domain containing 5	1.44482	7.12447	9.06748	2.86227e-06	9.32294e-05	4.98839	ERK240min
Lgals3	LGALS3	ENSMUST00000116487	lectin, galactose binding, soluble 3	-1.29146	14.5904	-9.06553	2.86802e-06	9.33249e-05	4.98629	ERK240min
Adamts9	ADAMTS9	ENSMUST00000113438	a disintegrin-like and metallopeptidase (reprolysin type) with thrombospondin type 1 motif, 9	-1.97359	8.00837	-9.05784	2.89087e-06	9.38837e-05	4.97802	ERK240min
Clu	CLU	ENSMUST00000022616	clusterin	1.27665	12.6673	9.05522	2.89869e-06	9.40454e-05	4.9752	ERK240min
Clps	CLPS	ENSMUST00000025062	colipase, pancreatic	-1.35818	8.56085	-9.04765	2.92145e-06	9.45058e-05	4.96704	ERK240min
Rcan1	RCAN1		regulator of calcineurin 1	-1.35817	10.0925	-9.04228	2.93771e-06	9.49392e-05	4.96125	ERK240min
Bai2	BAI2	ENSMUST00000030571	brain-specific angiogenesis inhibitor 2	1.16242	6.11976	9.03844	2.94938e-06	9.52234e-05	4.95711	ERK240min
Kbtbd13	KBTBD13		kelch repeat and BTB (POZ) domain containing 13	2.7108	3.10648	9.02824	2.98067e-06	9.57545e-05	4.94611	ERK240min
Dnahc2		ENSMUST00000108659	dynein, axonemal, heavy chain 2	1.87533	6.26728	9.02738	2.98331e-06	9.57545e-05	4.94518	ERK240min
Gm8541			predicted gene 8541	2.94054	2.41091	9.00957	3.03885e-06	9.7164e-05	4.92594	ERK240min
B3galtl		ENSMUST00000100404	beta 1,3-galactosyltransferase-like	-1.38274	9.04807	-9.00409	3.05618e-06	9.76238e-05	4.92001	ERK240min
Nnt	NNT	ENSMUST00000109208	nicotinamide nucleotide transhydrogenase	-1.47622	12.4618	-9.00215	3.06233e-06	9.76852e-05	4.91791	ERK240min
Ifnar1	IFNAR1		interferon (alpha and beta) receptor 1	1.38783	9.77875	9.00162	3.06401e-06	9.76852e-05	4.91734	ERK240min
Rsph3b	RSPH3		radial spoke 3B homolog (Chlamydomonas)	1.43655	10.3558	8.99914	3.07189e-06	9.78423e-05	4.91466	ERK240min
Abcg1	ABCG1	ENSMUST00000024829	ATP-binding cassette, sub-family G (WHITE), member 1	-2.40816	10.8059	-8.99678	3.07944e-06	9.79883e-05	4.9121	ERK240min
Tmtc4	TMTC4		transmembrane and tetratricopeptide repeat containing 4	-1.5823	9.33186	-8.99041	3.09985e-06	9.84006e-05	4.9052	ERK240min
Cilp2	CILP2		cartilage intermediate layer protein 2	1.19672	6.7684	8.9887	3.10537e-06	9.84006e-05	4.90335	ERK240min
Car3	CA3		carbonic anhydrase 3	1.97639	6.81117	8.98637	3.11287e-06	9.84006e-05	4.90083	ERK240min
Rtn3	RTN3	ENSMUST00000065304	reticulon 3	-1.1936	10.9519	-8.98627	3.11321e-06	9.84006e-05	4.90072	ERK240min
Smpd3	SMPD3	ENSMUST00000067512	sphingomyelin phosphodiesterase 3, neutral	3.747	5.37951	8.98214	3.1266e-06	9.85415e-05	4.89624	ERK240min
Gprc5b	GPRC5B		G protein-coupled receptor, family C, group 5, member B	-2.57569	9.17078	-8.97928	3.13589e-06	9.87404e-05	4.89314	ERK240min
Fam110b	FAM110B		family with sequence similarity 110, member B	-1.48747	9.33223	-8.97416	3.15264e-06	9.91732e-05	4.88759	ERK240min
Spred1	SPRED1		sprouty protein with EVH-1 domain 1, related sequence	2.56229	9.33319	8.97163	3.16093e-06	9.93396e-05	4.88485	ERK240min
Zbtb6	ZBTB6	ENSMUST00000053098	zinc finger and BTB domain containing 6	-1.19985	5.6602	-8.96857	3.17101e-06	9.9562e-05	4.88152	ERK240min
Plxna2	PLXNA2	ENSMUST00000027952	plexin A2	-2.09136	7.38855	-8.96699	3.17624e-06	9.96316e-05	4.8798	ERK240min
Syn1	SYN1	ENSMUST00000041344	synapsin I	-1.50551	10.5661	-8.96241	3.19141e-06	0.000100013	4.87483	ERK240min
Tmem213	TMEM213		transmembrane protein 213	-1.52943	6.27367	-8.95563	3.21402e-06	0.000100626	4.86746	ERK240min
Bhmt	BHMT	ENSMUST00000091776	betaine-homocysteine methyltransferase	-3.63239	6.00202	-8.95162	3.22748e-06	0.000100952	4.8631	ERK240min
Ildr1	ILDR1	ENSMUST00000119464	immunoglobulin-like domain containing receptor 1	-1.42199	10.9	-8.95041	3.23154e-06	0.000100983	4.86179	ERK240min
Ttn	TTN	ENSMUST00000099981	titin	-2.28321	4.93299	-8.9478	3.24035e-06	0.000101163	4.85895	ERK240min
Gale	GALE	ENSMUST00000102540	galactose-4-epimerase, UDP	1.22773	12.4764	8.93411	3.28691e-06	0.00010252	4.84406	ERK240min
Phox2a	PHOX2A	ENSMUST00000008090	paired-like homeobox 2a	1.89166	9.19194	8.92574	3.31576e-06	0.000103226	4.83494	ERK240min
Sec24a	SEC24A	ENSMUST00000147255	Sec24 related gene family, member A (S. cerevisiae)	1.74445	8.24893	8.92573	3.3158e-06	0.000103226	4.83493	ERK240min
Glb1	GLB1		galactosidase, beta 1	-1.18968	13.0621	-8.9197	3.33675e-06	0.000103781	4.82835	ERK240min
Stmn1	STMN1	ENSMUST00000030636	stathmin 1	-1.13596	15.9466	-8.91547	3.35153e-06	0.000104045	4.82374	ERK240min
Cav2	CAV2	ENSMUST00000000058	caveolin 2	2.3998	2.50301	8.90998	3.37081e-06	0.000104448	4.81775	ERK240min
Krt23	KRT23		keratin 23	8.4432	3.48442	8.90529	3.38738e-06	0.000104863	4.81263	ERK240min
Atf3	ATF3	ENSMUST00000027941	activating transcription factor 3	2.26732	7.50849	8.90119	3.40197e-06	0.000104961	4.80815	ERK240min
Add1	ADD1	ENSMUST00000114338	adducin 1 (alpha)	-1.12163	13.6682	-8.90084	3.40319e-06	0.000104961	4.80778	ERK240min
Defb36	DEFB123	ENSMUST00000058086	defensin beta 36	2.18695	5.20967	8.90083	3.40323e-06	0.000104961	4.80776	ERK240min
Fam131b	FAM131B		family with sequence similarity 131, member B	2.52829	4.62837	8.87882	3.48259e-06	0.000107209	4.7837	ERK240min
Snx10	SNX10	ENSMUST00000049152	sorting nexin 10	-1.30825	11.2938	-8.87221	3.50685e-06	0.000107755	4.77645	ERK240min
Lefty1	LEFTY1		left right determination factor 1	-5.36069	13.5488	-8.85954	3.55377e-06	0.000108893	4.76257	ERK240min
Ptrf	PTRF	ENSMUST00000060792	polymerase I and transcript release factor	2.25186	12.9298	8.85549	3.56892e-06	0.000109091	4.75813	ERK240min
Mn1	MN1		meningioma 1	-3.0209	6.89741	-8.85115	3.58526e-06	0.000109453	4.75336	ERK240min
Tspan17	TSPAN17	ENSMUST00000026993	tetraspanin 17	-1.58192	12.8028	-8.85002	3.5895e-06	0.000109482	4.75213	ERK240min
Tmem39a	TMEM39A		transmembrane protein 39a	-1.27181	12.4441	-8.84875	3.5943e-06	0.000109527	4.75073	ERK240min
Klhl22	KLHL22	ENSMUST00000120488	kelch-like 22 (Drosophila)	1.27469	11.6255	8.84238	3.61848e-06	0.000110056	4.74373	ERK240min
Plau	PLAU	ENSMUST00000022368	plasminogen activator, urokinase	2.36588	2.44323	8.84154	3.62165e-06	0.000110056	4.74282	ERK240min
Phf11			PHD finger protein 11	-1.6053	11.5818	-8.83718	3.63831e-06	0.000110461	4.73803	ERK240min
Piwil2	PIWIL2		piwi-like homolog 2 (Drosophila)	1.77631	7.20949	8.83294	3.65459e-06	0.000110486	4.73337	ERK240min
Ehhadh	EHHADH	ENSMUST00000023559	enoyl-Coenzyme A, hydratase/3-hydroxyacyl Coenzyme A dehydrogenase	-1.57465	6.9524	-8.8324	3.65668e-06	0.000110486	4.73277	ERK240min
Psd3	PSD3		pleckstrin and Sec7 domain containing 3	1.69601	4.12318	8.83223	3.6573e-06	0.000110486	4.73259	ERK240min
Greb1	GREB1	ENSMUST00000048064	gene regulated by estrogen in breast cancer protein	2.23844	7.64406	8.831	3.66205e-06	0.000110486	4.73124	ERK240min
2410088K16Rik			RIKEN cDNA 2410088K16 gene	2.3032	7.85506	8.83085	3.66262e-06	0.000110486	4.73107	ERK240min
Cst6	CST6		cystatin E/M	1.57569	5.69115	8.83039	3.66439e-06	0.000110486	4.73057	ERK240min
Prlr	PRLR	ENSMUST00000005400	prolactin receptor	-3.89852	6.70902	-8.83036	3.66451e-06	0.000110486	4.73053	ERK240min
Tiam2	TIAM2	ENSMUST00000072156	T-cell lymphoma invasion and metastasis 2	-1.45283	7.52929	-8.83002	3.66583e-06	0.000110486	4.73016	ERK240min
Aldh1l1	ALDH1L1	ENSMUST00000032175	aldehyde dehydrogenase 1 family, member L1	-1.42711	10.5607	-8.82904	3.66961e-06	0.000110499	4.72908	ERK240min
Zbtb7a	ZBTB7A		zinc finger and BTB domain containing 7a	-1.11872	8.33731	-8.82733	3.67624e-06	0.000110567	4.7272	ERK240min
Slc35d3	SLC35D3	ENSMUST00000059805	solute carrier family 35, member D3	3.15216	5.1334	8.82172	3.69803e-06	0.000111052	4.72103	ERK240min
Megf11	MEGF11		multiple EGF-like-domains 11	-2.58362	4.4146	-8.81605	3.7202e-06	0.000111616	4.71478	ERK240min
Pdk4	PDK4	ENSMUST00000019721	pyruvate dehydrogenase kinase, isoenzyme 4	-1.40933	8.81713	-8.81317	3.7315e-06	0.000111708	4.71162	ERK240min
Zfp273	ZNF676		zinc finger protein 273	-1.48883	8.31516	-8.81248	3.73421e-06	0.000111708	4.71086	ERK240min
Tpcn1	TPCN1	ENSMUST00000046426	two pore channel 1	-1.21428	10.8663	-8.80937	3.7465e-06	0.000111898	4.70743	ERK240min
Hbp1	HBP1	ENSMUST00000019163	high mobility group box transcription factor 1	-1.18647	9.27951	-8.80585	3.76046e-06	0.000112091	4.70354	ERK240min
8430410A17Rik			RIKEN cDNA 8430410A17 gene	1.76955	15.6819	8.79668	3.79701e-06	0.000112796	4.69344	ERK240min
Slc13a5	SLC13A5	ENSMUST00000021161	solute carrier family 13 (sodium-dependent citrate transporter), member 5	-1.96782	7.97888	-8.79094	3.82013e-06	0.000113089	4.6871	ERK240min
Plec	PLEC		plectin	1.75506	13.0814	8.7904	3.82231e-06	0.000113089	4.68651	ERK240min
Gpx4	GPX4	ENSMUST00000136081	glutathione peroxidase 4	-1.40325	15.8676	-8.78898	3.82804e-06	0.000113089	4.68494	ERK240min
Myc	MYC		myelocytomatosis oncogene	3.48094	10.8842	8.78769	3.83324e-06	0.000113089	4.68352	ERK240min
Plekhg6	PLEKHG6	ENSMUST00000042647	pleckstrin homology domain containing, family G (with RhoGef domain) member 6	-1.82722	8.10702	-8.78748	3.83411e-06	0.000113089	4.68328	ERK240min
Spc24	SPC24	ENSMUST00000098942	SPC24, NDC80 kinetochore complex component, homolog (S. cerevisiae)	-1.15085	13.0302	-8.78745	3.83421e-06	0.000113089	4.68326	ERK240min
Ucma	UCMA		upper zone of growth plate and cartilage matrix associated	-2.59593	5.5639	-8.78317	3.85161e-06	0.000113501	4.67853	ERK240min
Ttpa	TTPA	ENSMUST00000098245	tocopherol (alpha) transfer protein	-1.8417	4.52036	-8.78093	3.86077e-06	0.000113568	4.67605	ERK240min
Crisp3	CRISP3	ENSMUST00000026499	cysteine-rich secretory protein 3	-2.0031	5.87902	-8.77605	3.88074e-06	0.000113953	4.67066	ERK240min
Zfp455	ZNF727	ENSMUST00000120861	zinc finger protein 455	-1.50172	5.76972	-8.7686	3.91146e-06	0.000114718	4.66242	ERK240min
Nab1	NAB1		Ngfi-A binding protein 1	1.98182	8.74059	8.76805	3.91373e-06	0.000114718	4.66182	ERK240min
2810416G20Rik			RIKEN cDNA 2810416G20 gene	-1.29918	7.63428	-8.7575	3.95772e-06	0.000115905	4.65014	ERK240min
Tank	TANK	ENSMUST00000145632	TRAF family member-associated Nf-kappa B activator	1.57767	6.15527	8.75493	3.9685e-06	0.000116118	4.6473	ERK240min
Lgr5	LGR5	ENSMUST00000020350	leucine rich repeat containing G protein coupled receptor 5	2.89914	2.50045	8.75202	3.9808e-06	0.000116375	4.64407	ERK240min
Casc1	CASC1	ENSMUST00000111728	cancer susceptibility candidate 1	-2.47485	5.41115	-8.74595	4.0065e-06	0.000116759	4.63734	ERK240min
Pcdh19	PCDH19	ENSMUST00000113316	protocadherin 19	-2.91797	5.28943	-8.74588	4.00678e-06	0.000116759	4.63727	ERK240min
Mdfi	MDFI		MyoD family inhibitor	1.46571	11.4929	8.74537	4.00896e-06	0.000116759	4.6367	ERK240min
Mup6			major urinary protein 6	-2.18254	8.48305	-8.74475	4.01158e-06	0.000116759	4.63602	ERK240min
Ccno	CCNO	ENSMUST00000038404	cyclin O	-2.09072	9.2785	-8.74321	4.01814e-06	0.000116847	4.63431	ERK240min
Ephx1	EPHX1	ENSMUST00000036928	epoxide hydrolase 1, microsomal	-1.54897	10.8403	-8.74054	4.02957e-06	0.00011705	4.63134	ERK240min
Cdh3	CDH3		cadherin 3	-1.61409	9.62557	-8.73992	4.0322e-06	0.00011705	4.63066	ERK240min
Zfp59	ZNF780A	ENSMUST00000108332	zinc finger protein 59	-1.67962	11.5285	-8.73735	4.04321e-06	0.000117077	4.62781	ERK240min
Olfr808	OR6C65		olfactory receptor 808	1.54315	2.54738	8.73724	4.04372e-06	0.000117077	4.62768	ERK240min
Eif4g3	EIF4G3	ENSMUST00000105832	eukaryotic translation initiation factor 4 gamma, 3	-1.45719	10.563	-8.73472	4.05456e-06	0.000117288	4.62489	ERK240min
Exoc3l2		ENSMUST00000137613	exocyst complex component 3-like 2	-2.50527	7.38526	-8.72614	4.09167e-06	0.000118258	4.61537	ERK240min
Inf2	INF2	ENSMUST00000039111	inverted formin, FH2 and WH2 domain containing	1.40092	11.6018	8.71992	4.11879e-06	0.000118938	4.60846	ERK240min
Pgm2l1	PGM2L1	ENSMUST00000084935	phosphoglucomutase 2-like 1	-1.42148	6.6921	-8.71655	4.13362e-06	0.000119199	4.60471	ERK240min
Esd	ESD		esterase D/formylglutathione hydrolase	1.0314	13.6398	8.70822	4.17041e-06	0.000120114	4.59545	ERK240min
Zfp820			zinc finger protein 820	-1.39862	8.15071	-8.70419	4.18834e-06	0.000120461	4.59097	ERK240min
Capsl	CAPSL		calcyphosine-like	-1.47614	9.90721	-8.69072	4.24891e-06	0.00012192	4.57597	ERK240min
Gm11223			stathmin 1 pseudogene	-1.07795	15.7003	-8.68239	4.28679e-06	0.000122507	4.56669	ERK240min
Tlr2	TLR2	ENSMUST00000029623	toll-like receptor 2	-1.2074	8.85466	-8.68044	4.29571e-06	0.000122656	4.56452	ERK240min
Sgca	SGCA	ENSMUST00000100551	sarcoglycan, alpha (dystrophin-associated glycoprotein)	-1.53438	6.40625	-8.6748	4.32168e-06	0.00012329	4.55822	ERK240min
Sri	SRI	ENSMUST00000003245	sorcin	-1.07976	12.069	-8.66628	4.36121e-06	0.000124204	4.54871	ERK240min
Plcb1	PLCB1	ENSMUST00000110116	phospholipase C, beta 1	1.49491	4.15524	8.66367	4.37337e-06	0.000124337	4.5458	ERK240min
Gpr146	GPR146	ENSMUST00000100514	G protein-coupled receptor 146	-2.6195	5.77908	-8.66277	4.37758e-06	0.00012435	4.54479	ERK240min
S100a4	S100A4	ENSMUST00000107330	S100 calcium binding protein A4	4.77633	5.01091	8.66086	4.38651e-06	0.000124457	4.54266	ERK240min
Hspb8	HSPB8	ENSMUST00000133335	heat shock protein 8	-2.01571	9.74677	-8.6579	4.40041e-06	0.000124677	4.53935	ERK240min
Tnnt2	TNNT2		troponin T2, cardiac	-2.19322	4.79485	-8.65641	4.40747e-06	0.00012477	4.53768	ERK240min
Sspo	SSPO	ENSMUST00000043676	SCO-spondin	-1.18011	6.01596	-8.64894	4.44281e-06	0.000125583	4.52933	ERK240min
Tob1	TOB1		transducer of ErbB-2.1	-1.3727	9.72588	-8.64874	4.44376e-06	0.000125583	4.52911	ERK240min
Sdr42e1	SDR42E1		short chain dehydrogenase/reductase family 42E, member 1	1.79593	7.55297	8.64536	4.45986e-06	0.00012593	4.52533	ERK240min
Twsg1	TWSG1	ENSMUST00000024906	twisted gastrulation homolog 1 (Drosophila)	1.28462	10.4459	8.64269	4.47264e-06	0.000126172	4.52234	ERK240min
Zc3hav1	ZC3HAV1	ENSMUST00000031850	zinc finger CCCH type, antiviral 1	-2.34308	6.6978	-8.63672	4.50133e-06	0.000126777	4.51565	ERK240min
Tmem64	TMEM64		transmembrane protein 64	-1.83009	10.4787	-8.63357	4.51654e-06	0.000126989	4.51213	ERK240min
1110028C15Rik		ENSMUST00000042389	RIKEN cDNA 1110028C15 gene	-2.04921	4.36519	-8.62943	4.53662e-06	0.000127229	4.50749	ERK240min
Tnrc18	TNRC18		trinucleotide repeat containing 18	-1.2735	7.29311	-8.62661	4.55038e-06	0.000127507	4.50433	ERK240min
Efs	EFS	ENSMUST00000022813	embryonal Fyn-associated substrate	1.79399	11.2564	8.62309	4.5676e-06	0.000127773	4.50038	ERK240min
Ccdc36	CCDC36		coiled-coil domain containing 36	1.29232	7.20994	8.62097	4.57799e-06	0.000127956	4.498	ERK240min
Tor3a	TOR3A	ENSMUST00000156861	torsin family 3, member A	1.23614	7.6846	8.61786	4.59326e-06	0.000128269	4.49452	ERK240min
Gm4673			predicted gene 4673	-1.35596	5.05221	-8.61499	4.60743e-06	0.000128453	4.4913	ERK240min
Slit2	SLIT2	ENSMUST00000033967	slit homolog 2 (Drosophila)	-3.30707	6.48131	-8.60265	4.66891e-06	0.000129839	4.47745	ERK240min
Plac9			placenta specific 9	-1.75464	10.5913	-8.59852	4.68969e-06	0.000130198	4.4728	ERK240min
Hesx1	HESX1	ENSMUST00000035433	homeobox gene expressed in ES cells	-3.76171	8.05806	-8.58927	4.73661e-06	0.000131294	4.4624	ERK240min
Cep70	CEP70	ENSMUST00000093795	centrosomal protein 70	-1.17886	11.4328	-8.57805	4.79417e-06	0.000132543	4.44977	ERK240min
Fam183b	FAM183A		family with sequence similarity 183, member B	-1.67092	11.4599	-8.57657	4.80177e-06	0.000132642	4.44811	ERK240min
Areg	AREG	ENSMUST00000031325	amphiregulin	3.01934	2.8563	8.56325	4.87125e-06	0.000134225	4.43309	ERK240min
Ninl	NINL	ENSMUST00000099238	ninein-like	-1.62514	9.80883	-8.56214	4.87705e-06	0.000134273	4.43185	ERK240min
Arap2	ARAP2	ENSMUST00000076623	ArfGAP with RhoGAP domain, ankyrin repeat and PH domain 2	1.54709	8.01777	8.55661	4.90624e-06	0.00013491	4.42561	ERK240min
Zcchc18	ZCCHC18	ENSMUST00000113067	zinc finger, CCHC domain containing 18	-2.27406	7.48792	-8.55295	4.92565e-06	0.000134962	4.42148	ERK240min
Tgtp2		ENSMUST00000068063	T-cell specific GTPase 2	-2.42569	8.37611	-8.55279	4.92654e-06	0.000134962	4.42129	ERK240min
Tnfsf12	TNFSF12	ENSMUST00000102587	tumor necrosis factor (ligand) superfamily, member 12	1.01132	7.51014	8.54512	4.96747e-06	0.000135746	4.41264	ERK240min
Ctsc	CTSC		cathepsin C	1.46855	9.08378	8.54389	4.9741e-06	0.000135815	4.41124	ERK240min
Hebp2	HEBP2		heme binding protein 2	1.62649	7.27055	8.54089	4.99026e-06	0.000135943	4.40785	ERK240min
Gm2a	GM2A	ENSMUST00000000608	GM2 ganglioside activator protein	-1.69948	8.22108	-8.53998	4.99517e-06	0.000135943	4.40682	ERK240min
Gadd45b	GADD45B		growth arrest and DNA-damage-inducible 45 beta	-2.23223	10.5995	-8.53997	4.99521e-06	0.000135943	4.40682	ERK240min
Tiam1	TIAM1	ENSMUST00000002588	T-cell lymphoma invasion and metastasis 1	-1.35821	8.77645	-8.53271	5.03457e-06	0.000136901	4.39861	ERK240min
Dst	DST	ENSMUST00000097789	dystonin	-1.22113	9.54814	-8.52866	5.05669e-06	0.000137342	4.39402	ERK240min
Ptger2	PTGER2	ENSMUST00000046891	prostaglandin E receptor 2 (subtype EP2)	2.868	5.96191	8.52599	5.07131e-06	0.000137549	4.391	ERK240min
Tmsb15b1	TMSB15A		thymosin beta 15b1	-1.32981	9.04	-8.52531	5.07502e-06	0.000137549	4.39024	ERK240min
Lims2	LIMS2	ENSMUST00000025254	LIM and senescent cell antigen like domains 2	-1.14207	6.86448	-8.52413	5.08152e-06	0.000137613	4.3889	ERK240min
Tek	TEK	ENSMUST00000071168	endothelial-specific receptor tyrosine kinase	-2.248	7.34601	-8.52316	5.08685e-06	0.000137645	4.3878	ERK240min
Irs1	IRS1	ENSMUST00000069799	insulin receptor substrate 1	-1.88553	7.07804	-8.51737	5.11886e-06	0.000138059	4.38124	ERK240min
Crct1			cysteine-rich C-terminal 1	2.34156	7.41463	8.51621	5.1253e-06	0.00013812	4.37993	ERK240min
Adcy7	ADCY7		adenylate cyclase 7	2.01521	5.99398	8.51424	5.13623e-06	0.00013819	4.3777	ERK240min
Ulk1	ULK1	ENSMUST00000112410	Unc-51 like kinase 1 (C. elegans)	-1.78654	14.9883	-8.51156	5.15116e-06	0.000138479	4.37466	ERK240min
Wtap	WTAP	ENSMUST00000160781	Wilms' tumour 1-associating protein	-1.43046	12.2099	-8.50645	5.17979e-06	0.000139135	4.36887	ERK240min
Lrrcc1	LRRCC1	ENSMUST00000091325	leucine rich repeat and coiled-coil domain containing 1	-1.40773	9.97242	-8.50329	5.19755e-06	0.000139435	4.36529	ERK240min
Cmtm7	CMTM7		CKLF-like MARVEL transmembrane domain containing 7	-1.97447	12.0129	-8.49767	5.22931e-06	0.000140124	4.35892	ERK240min
Lrriq4	LRRIQ4		leucine-rich repeats and IQ motif containing 4	-1.29095	8.39989	-8.49168	5.26341e-06	0.000140673	4.35212	ERK240min
Gm14005			predicted gene 14005	3.58615	4.50839	8.49084	5.26824e-06	0.000140673	4.35116	ERK240min
Meis1	MEIS1	ENSMUST00000068264	Meis homeobox 1	2.99465	7.98033	8.49065	5.26934e-06	0.000140673	4.35094	ERK240min
Ap1s3	AP1S3	ENSMUST00000067229	adaptor-related protein complex AP-1, sigma 3	1.42959	10.0487	8.48964	5.27511e-06	0.000140673	4.3498	ERK240min
H2-M5		ENSMUST00000113667	histocompatibility 2, M region locus 5	-2.40059	8.66096	-8.48447	5.30479e-06	0.000141232	4.34393	ERK240min
Rtn1	RTN1		reticulon 1	-1.43072	10.6592	-8.48332	5.31142e-06	0.000141295	4.34262	ERK240min
Leng9	LENG9	ENSMUST00000058358	leukocyte receptor cluster (LRC) member 9	-2.18902	7.23569	-8.4822	5.31792e-06	0.000141354	4.34134	ERK240min
Tcl1	TCL1A		T-cell lymphoma breakpoint 1	-3.13833	13.839	-8.47471	5.36138e-06	0.000142281	4.33283	ERK240min
Slc5a11	SLC5A11		solute carrier family 5 (sodium/glucose cotransporter), member 11	-2.26672	11.0064	-8.46874	5.39626e-06	0.000142977	4.32605	ERK240min
Tnfaip6	TNFAIP6		tumor necrosis factor alpha induced protein 6	-1.53117	5.328	-8.46169	5.43786e-06	0.000143849	4.31801	ERK240min
Ccdc85a	CCDC85A	ENSMUST00000042534	coiled-coil domain containing 85A	-2.30591	8.29444	-8.45509	5.47703e-06	0.000144654	4.3105	ERK240min
Lypla1	LYPLA1	ENSMUST00000150971	lysophospholipase 1	-1.38373	9.2259	-8.45132	5.4996e-06	0.000145134	4.3062	ERK240min
Spink2	SPINK2	ENSMUST00000065216	serine peptidase inhibitor, Kazal type 2	-1.70056	7.84919	-8.44855	5.51623e-06	0.000145457	4.30304	ERK240min
Fbln2	FBLN2	ENSMUST00000137029	fibulin 2	-2.05389	7.47574	-8.44354	5.54643e-06	0.000146088	4.29733	ERK240min
1300010F03Rik		ENSMUST00000040990	RIKEN cDNA 1300010F03 gene	-1.16873	9.06906	-8.44312	5.54898e-06	0.000146088	4.29685	ERK240min
Chst5	CHST6	ENSMUST00000034430	carbohydrate (N-acetylglucosamine 6-O) sulfotransferase 5	2.45458	5.71704	8.44119	5.56068e-06	0.000146236	4.29465	ERK240min
Tmem63a	TMEM63A	ENSMUST00000161523	transmembrane protein 63a	-2.36075	9.46011	-8.44073	5.56346e-06	0.000146236	4.29412	ERK240min
Gstm2	GSTM1	ENSMUST00000012348	glutathione S-transferase, mu 2	-1.44374	8.86332	-8.43679	5.58743e-06	0.00014675	4.28963	ERK240min
Hist2h3c2-ps			histone cluster 2, H3c2, pseudogene	2.35995	5.74828	8.43251	5.61354e-06	0.00014721	4.28475	ERK240min
Ctdsp2	CTDSP2		CTD (carboxy-terminal domain, RNA polymerase II, polypeptide A) small phosphatase 2	-1.52117	10.255	-8.42701	5.64739e-06	0.000147855	4.27846	ERK240min
Zfp85-rs1		ENSMUST00000091520	zinc finger protein 85, related sequence 1	-1.7976	6.34132	-8.4251	5.65915e-06	0.000148046	4.27628	ERK240min
Rin1	RIN1	ENSMUST00000025818	Ras and Rab interactor 1	1.71483	6.54022	8.41818	5.70207e-06	0.000148941	4.26838	ERK240min
Galnt2	GALNT2	ENSMUST00000034458	UDP-N-acetyl-alpha-D-galactosamine:polypeptide N-acetylgalactosaminyltransferase 2	-1.90531	11.6276	-8.41784	5.70424e-06	0.000148941	4.26798	ERK240min
Slc25a24	SLC25A24	ENSMUST00000029477	solute carrier family 25 (mitochondrial carrier, phosphate carrier), member 24	1.83933	6.35799	8.41301	5.73442e-06	0.000149223	4.26246	ERK240min
Trim13	TRIM13	ENSMUST00000039562	tripartite motif-containing 13	-1.11475	11.4601	-8.4128	5.7357e-06	0.000149223	4.26223	ERK240min
Sgce	SGCE		sarcoglycan, epsilon	1.60414	7.98992	8.4109	5.74763e-06	0.000149251	4.26005	ERK240min
Plp1	PLP1	ENSMUST00000113085	proteolipid protein (myelin) 1	-1.30662	7.45979	-8.40971	5.75516e-06	0.000149251	4.25868	ERK240min
Anxa2	ANXA2	ENSMUST00000034756	annexin A2	1.20998	13.3465	8.40905	5.75932e-06	0.000149251	4.25793	ERK240min
Elovl3	ELOVL3	ENSMUST00000043739	elongation of very long chain fatty acids (FEN1/Elo2, SUR4/Elo3, yeast)-like 3	3.48686	2.60984	8.40741	5.76961e-06	0.00014926	4.25606	ERK240min
Ranbp17	RANBP17		RAN binding protein 17	-1.21773	8.93084	-8.40723	5.7708e-06	0.00014926	4.25584	ERK240min
Aoah	AOAH	ENSMUST00000021757	acyloxyacyl hydrolase	-1.15012	10.4238	-8.40684	5.77321e-06	0.00014926	4.25541	ERK240min
Cerk	CERK	ENSMUST00000044332	ceramide kinase	1.83974	8.24289	8.4002	5.81536e-06	0.000150115	4.24779	ERK240min
Gpm6b	GPM6B		glycoprotein m6b	3.1623	5.36308	8.39874	5.82466e-06	0.000150238	4.24612	ERK240min
Vps54	VPS54	ENSMUST00000094375	vacuolar protein sorting 54 (yeast)	-1.26013	9.2092	-8.39026	5.87899e-06	0.000151521	4.23641	ERK240min
Ngfr	NGFR	ENSMUST00000000122	nerve growth factor receptor (TNFR superfamily, member 16)	-1.38361	11.6197	-8.3858	5.90778e-06	0.000152026	4.2313	ERK240min
Zfp931	ZNF559-ZNF177	ENSMUST00000109061	zinc finger protein 931	-1.03549	11.5916	-8.38239	5.92989e-06	0.00015224	4.22739	ERK240min
Ndrg4	NDRG4	ENSMUST00000041318	N-myc downstream regulated gene 4	-2.01177	10.6721	-8.3724	5.99521e-06	0.000153798	4.21592	ERK240min
Tbc1d24	TBC1D24		TBC1 domain family, member 24	-1.67088	7.20018	-8.37055	6.00743e-06	0.000153992	4.21379	ERK240min
Efhd1	EFHD1		EF hand domain containing 1	-2.33352	8.07084	-8.36641	6.03481e-06	0.000154567	4.20903	ERK240min
Purb	PURB	ENSMUST00000059507	purine rich element binding protein B	1.18781	11.8422	8.36574	6.0392e-06	0.000154567	4.20827	ERK240min
Sox21	SOX21	ENSMUST00000082178	SRY-box containing gene 21	-3.38133	7.8752	-8.36195	6.0644e-06	0.000155092	4.20391	ERK240min
Ppm1f	PPM1F	ENSMUST00000027373	protein phosphatase 1F (PP2C domain containing)	1.12321	13.5151	8.35632	6.10202e-06	0.000155934	4.19744	ERK240min
Usp48	USP48	ENSMUST00000105840	ubiquitin specific peptidase 48	-1.64669	12.9568	-8.35546	6.10783e-06	0.000155962	4.19645	ERK240min
Gfm2	GFM2	ENSMUST00000161825	G elongation factor, mitochondrial 2	1.07287	7.75315	8.35287	6.12519e-06	0.000156168	4.19347	ERK240min
Sorbs3	SORBS3	ENSMUST00000022682	sorbin and SH3 domain containing 3	1.45581	5.57881	8.35285	6.12533e-06	0.000156168	4.19345	ERK240min
Ivl	IVL	ENSMUST00000053107	involucrin	2.72507	2.73396	8.34974	6.14633e-06	0.000156582	4.18987	ERK240min
Cldn9	CLDN9	ENSMUST00000085989	claudin 9	1.20019	8.11498	8.34723	6.16335e-06	0.000156895	4.18698	ERK240min
AW551984	VWA5A	ENSMUST00000119722	expressed sequence AW551984	-2.47464	6.91442	-8.34565	6.17405e-06	0.000157014	4.18516	ERK240min
Ldhc	LDHC		lactate dehydrogenase C	-1.208	9.41976	-8.34514	6.1775e-06	0.000157014	4.18458	ERK240min
Ptplb	PTPLB		protein tyrosine phosphatase-like (proline instead of catalytic arginine), member b	1.37666	7.46061	8.34423	6.18372e-06	0.000157051	4.18352	ERK240min
Gm98		ENSMUST00000088013	predicted gene 98	1.24524	5.55094	8.34198	6.19903e-06	0.000157319	4.18093	ERK240min
Snx24	SNX24	ENSMUST00000025417	sorting nexing 24	2.0421	7.88547	8.32227	6.33504e-06	0.000160279	4.15822	ERK240min
Fbxw10	FBXW10	ENSMUST00000150989	F-box and WD-40 domain protein 10	-1.52804	8.5797	-8.31322	6.39861e-06	0.000161641	4.14777	ERK240min
Smtnl2	SMTNL2		smoothelin-like 2	-2.53104	12.8221	-8.30982	6.42265e-06	0.000162001	4.14384	ERK240min
Rassf3	RASSF3	ENSMUST00000026902	Ras association (RalGDS/AF-6) domain family member 3	1.92062	7.75173	8.30202	6.47819e-06	0.000163277	4.13483	ERK240min
Ppp1r1a	PPP1R1A	ENSMUST00000023133	protein phosphatase 1, regulatory (inhibitor) subunit 1A	-1.72178	8.16813	-8.29674	6.51611e-06	0.000163983	4.12872	ERK240min
Rgs20	RGS20	ENSMUST00000002533	regulator of G-protein signaling 20	5.27458	4.11788	8.29576	6.52316e-06	0.000164036	4.12759	ERK240min
Cobl	COBL		cordon-bleu	-1.96252	12.6028	-8.29336	6.5405e-06	0.000164347	4.12481	ERK240min
Slc32a1	SLC32A1	ENSMUST00000045738	solute carrier family 32 (GABA vesicular transporter), member 1	-2.13385	8.02219	-8.29045	6.56159e-06	0.000164752	4.12144	ERK240min
Tex12	TEX12		testis expressed gene 12	1.08424	4.29409	8.28732	6.58432e-06	0.000164833	4.11782	ERK240min
Rab25	RAB25	ENSMUST00000008745	RAB25, member RAS oncogene family	2.15096	9.33248	8.28726	6.58477e-06	0.000164833	4.11775	ERK240min
Gm12824		ENSMUST00000094894	predicted gene 12824	1.34155	2.02877	8.28268	6.6182e-06	0.00016542	4.11244	ERK240min
Ankrd13b	ANKRD13B	ENSMUST00000092892	ankyrin repeat domain 13b	1.34574	10.8929	8.27787	6.65352e-06	0.000166041	4.10687	ERK240min
Hic2	HIC2	ENSMUST00000090190	hypermethylated in cancer 2	-1.14808	13.3664	-8.27725	6.6581e-06	0.000166041	4.10615	ERK240min
Mapk8ip2	MAPK8IP2		mitogen-activated protein kinase 8 interacting protein 2	-1.34231	9.45211	-8.27486	6.67572e-06	0.000166355	4.10338	ERK240min
Gm9732		ENSMUST00000095985	predicted gene 9732	1.3738	6.68001	8.27389	6.6829e-06	0.000166409	4.10226	ERK240min
4930578N18Rik			RIKEN cDNA 4930578N18 gene	1.1637	2.30576	8.26862	6.72199e-06	0.000167224	4.09615	ERK240min
Phactr2	PHACTR2		phosphatase and actin regulator 2	-1.56022	6.76234	-8.26775	6.72851e-06	0.000167224	4.09514	ERK240min
Bahd1	BAHD1	ENSMUST00000036578	bromo adjacent homology domain containing 1	-1.46633	7.78911	-8.26721	6.73251e-06	0.000167224	4.09452	ERK240min
Fam83d	FAM83D	ENSMUST00000151801	family with sequence similarity 83, member D	-1.13087	9.45866	-8.26676	6.73584e-06	0.000167224	4.094	ERK240min
Fzd5	FZD5	ENSMUST00000116133	frizzled homolog 5 (Drosophila)	-2.00999	8.43548	-8.26467	6.75153e-06	0.000167487	4.09156	ERK240min
Slc28a1	SLC28A1	ENSMUST00000026820	solute carrier family 28 (sodium-coupled nucleoside transporter), member 1	-1.46283	12.8765	-8.26381	6.7579e-06	0.00016752	4.09058	ERK240min
Lgals7	LGALS7		lectin, galactose binding, soluble 7	4.33433	5.41291	8.26272	6.76609e-06	0.000167598	4.08931	ERK240min
Snx33	SNX33	ENSMUST00000050916	sorting nexin 33	2.22905	5.24913	8.26203	6.77126e-06	0.0001676	4.08851	ERK240min
Fgf21	FGF21	ENSMUST00000033099	fibroblast growth factor 21	2.5709	2.92032	8.26079	6.78058e-06	0.000167705	4.08707	ERK240min
Il11	IL11	ENSMUST00000094892	interleukin 11	1.69768	6.83265	8.25894	6.7945e-06	0.000167829	4.08492	ERK240min
Eif4e1b	EIF4E1B	ENSMUST00000132728	eukaryotic translation initiation factor 4E family member 1B	-2.43998	6.03915	-8.25878	6.7957e-06	0.000167829	4.08473	ERK240min
Pon2	PON2		paraoxonase 2	1.85872	5.92543	8.25463	6.82705e-06	0.000168477	4.07992	ERK240min
Rab31	RAB31		RAB31, member RAS oncogene family	1.30093	10.3516	8.25031	6.85983e-06	0.00016916	4.0749	ERK240min
Gm4975	SGOL2		predicted gene 4975	-1.75136	6.34111	-8.24323	6.91395e-06	0.000170241	4.06667	ERK240min
Gpr162	GPR162		G protein-coupled receptor 162	-1.99102	9.36377	-8.23132	7.00604e-06	0.000172252	4.05282	ERK240min
A230065H16Rik			RIKEN cDNA A230065H16 gene	1.98466	5.41596	8.22673	7.0419e-06	0.000172893	4.04747	ERK240min
Hoxc4	HOXC4	ENSMUST00000100164	homeobox C4	-2.59221	4.98435	-8.224	7.06335e-06	0.000173146	4.04429	ERK240min
Scn3a	SCN3A	ENSMUST00000066432	sodium channel, voltage-gated, type III, alpha	-3.11702	4.78858	-8.22196	7.07941e-06	0.000173318	4.04191	ERK240min
Dus4l	DUS4L	ENSMUST00000020977	dihydrouridine synthase 4-like (S. cerevisiae)	1.3749	9.26185	8.22178	7.08084e-06	0.000173318	4.0417	ERK240min
Mboat1	MBOAT1		membrane bound O-acyltransferase domain containing 1	-1.43878	9.05088	-8.2209	7.08772e-06	0.000173358	4.04068	ERK240min
Vav3	VAV3	ENSMUST00000106576	vav 3 oncogene	2.26658	4.1175	8.20884	7.18355e-06	0.000175372	4.02662	ERK240min
Rbms1	RBMS1		RNA binding motif, single stranded interacting protein 1	1.19347	12.4006	8.20628	7.20407e-06	0.000175555	4.02363	ERK240min
Col2a1	COL2A1	ENSMUST00000088354	collagen, type II, alpha 1	-1.61118	7.75658	-8.20256	7.23395e-06	0.000176154	4.0193	ERK240min
Sgms2	SGMS2	ENSMUST00000090246	sphingomyelin synthase 2	2.78919	5.27616	8.20142	7.24322e-06	0.00017625	4.01796	ERK240min
Notch4	NOTCH4	ENSMUST00000015612	Notch gene homolog 4 (Drosophila)	-2.21078	9.88084	-8.19882	7.26423e-06	0.000176631	4.01492	ERK240min
Tmem108	TMEM108	ENSMUST00000049452	transmembrane protein 108	-1.46552	5.71592	-8.19761	7.27405e-06	0.00017674	4.01351	ERK240min
Csrp1	CSRP1		cysteine and glycine-rich protein 1	-1.27141	14.382	-8.1949	7.29604e-06	0.000177144	4.01035	ERK240min
Gm3448	TCTE3		predicted gene 3448	1.59423	10.0175	8.18712	7.35966e-06	0.000178558	4.00125	ERK240min
Atat1	ATAT1	ENSMUST00000056034	alpha tubulin acetyltransferase 1	-2.08158	4.09753	-8.17513	7.45881e-06	0.000180699	3.98724	ERK240min
Cry2	CRY2	ENSMUST00000090559	cryptochrome 2 (photolyase-like)	-1.35072	11.8014	-8.16134	7.57476e-06	0.000183227	3.97108	ERK240min
AW011956			expressed sequence AW011956	2.11137	6.32407	8.16036	7.58305e-06	0.000183227	3.96994	ERK240min
Pdgfa	PDGFA	ENSMUST00000110897	platelet derived growth factor, alpha	-1.81469	13.9039	-8.15925	7.59244e-06	0.000183265	3.96864	ERK240min
Serp2	SERP2		stress-associated endoplasmic reticulum protein family member 2	1.17795	9.01083	8.15635	7.61714e-06	0.000183557	3.96524	ERK240min
Rac2	RAC2	ENSMUST00000043214	RAS-related C3 botulinum substrate 2	-1.48319	6.44968	-8.15588	7.62118e-06	0.000183557	3.96468	ERK240min
Ak8	AK8	ENSMUST00000074156	adenylate kinase 8	-1.17113	7.24093	-8.15428	7.63483e-06	0.000183752	3.96281	ERK240min
Olfr193	OR5H2	ENSMUST00000076262	olfactory receptor 193	1.70659	2.40762	8.14634	7.70301e-06	0.000184919	3.9535	ERK240min
Slc16a11	SLC16A11		solute carrier family 16 (monocarboxylic acid transporters), member 11	1.54053	8.27358	8.14157	7.74427e-06	0.000185324	3.9479	ERK240min
Kctd1	KCTD1	ENSMUST00000025992	potassium channel tetramerisation domain containing 1	-2.3125	5.10354	-8.14149	7.74495e-06	0.000185324	3.94781	ERK240min
Wfdc2	WFDC2	ENSMUST00000109343	WAP four-disulfide core domain 2	-2.72281	10.3414	-8.13906	7.76609e-06	0.000185377	3.94495	ERK240min
Ifitm2	IFITM2	ENSMUST00000081649	interferon induced transmembrane protein 2	-1.65704	14.3362	-8.13896	7.76702e-06	0.000185377	3.94483	ERK240min
Lrmp	LRMP	ENSMUST00000135984	lymphoid-restricted membrane protein	-1.97805	10.0411	-8.13866	7.76957e-06	0.000185377	3.94448	ERK240min
Stbd1	STBD1		starch binding domain 1	1.63879	5.868	8.13666	7.78705e-06	0.000185661	3.94213	ERK240min
Slmo1	SLMO1		slowmo homolog 1 (Drosophila)	1.34236	9.07558	8.13008	7.84469e-06	0.000186669	3.93441	ERK240min
Glud1	GLUD1	ENSMUST00000022322	glutamate dehydrogenase 1	1.05442	14.7865	8.12991	7.84626e-06	0.000186669	3.9342	ERK240min
Tmem9b	TMEM9B	ENSMUST00000033333	TMEM9 domain family, member B	1.16595	9.06438	8.12683	7.87338e-06	0.000187179	3.93058	ERK240min
Dnahc17		ENSMUST00000018719	dynein, axonemal, heavy chain 17	-2.21242	4.00707	-8.1261	7.87981e-06	0.000187198	3.92973	ERK240min
Kcns3	KCNS3	ENSMUST00000055673	potassium voltage-gated channel, delayed-rectifier, subfamily S, member 3	-3.21807	7.43649	-8.12328	7.9048e-06	0.000187657	3.92641	ERK240min
Chrna7	CHRNA7	ENSMUST00000032738	cholinergic receptor, nicotinic, alpha polypeptide 7	-1.22178	5.26166	-8.11651	7.96515e-06	0.000188819	3.91844	ERK240min
Rasef	RASEF	ENSMUST00000058292	RAS and EF hand domain containing	2.94324	5.11456	8.11367	7.99058e-06	0.000189199	3.9151	ERK240min
Zbtb44	ZBTB44		zinc finger and BTB domain containing 44	-2.4335	7.50629	-8.11345	7.99262e-06	0.000189199	3.91484	ERK240min
Etv1	ETV1	ENSMUST00000162730	ets variant gene 1	2.35543	10.7681	8.10953	8.02785e-06	0.000189626	3.91023	ERK240min
Pogk	POGK		pogo transposable element with KRAB domain	2.01511	4.95105	8.106	8.05982e-06	0.000190245	3.90606	ERK240min
Dact3	DACT3		dapper homolog 3, antagonist of beta-catenin (xenopus)	-1.31903	9.01975	-8.09646	8.14674e-06	0.000191936	3.89483	ERK240min
Sox11	SOX11	ENSMUST00000079063	SRY-box containing gene 11	2.58751	5.97166	8.09465	8.16341e-06	0.000192102	3.89269	ERK240min
Irx1	IRX1	ENSMUST00000077337	Iroquois related homeobox 1 (Drosophila)	-1.66129	5.07873	-8.09231	8.18496e-06	0.000192376	3.88992	ERK240min
AA467197	C15orf48		expressed sequence AA467197	-1.19233	8.27999	-8.08906	8.21491e-06	0.000192943	3.8861	ERK240min
Mycl1		ENSMUST00000030407	v-myc myelocytomatosis viral oncogene homolog 1, lung carcinoma derived (avian)	-3.27128	7.07781	-8.07998	8.29944e-06	0.00019479	3.87537	ERK240min
Myo1c	MYO1C	ENSMUST00000057572	myosin IC	1.36963	10.8036	8.07764	8.32136e-06	0.000195116	3.87261	ERK240min
Itpr3	ITPR3	ENSMUST00000049308	inositol 1,4,5-triphosphate receptor 3	1.01376	13.3272	8.07207	8.37382e-06	0.000195564	3.86602	ERK240min
Acss1	ACSS1		acyl-CoA synthetase short-chain family member 1	-3.11278	12.2082	-8.07089	8.38493e-06	0.000195686	3.86463	ERK240min
Enc1	ENC1	ENSMUST00000041623	ectodermal-neural cortex 1	1.68632	12.6657	8.0698	8.39524e-06	0.000195788	3.86335	ERK240min
Fam169a	FAM169A		family with sequence similarity 169, member A	1.28729	10.9037	8.06903	8.40255e-06	0.000195821	3.86243	ERK240min
Srsf13b		ENSMUST00000067864	serine/arginine-rich splicing factor 13B	2.06755	5.9007	8.06744	8.41767e-06	0.000196035	3.86055	ERK240min
Cryab	CRYAB	ENSMUST00000093849	crystallin, alpha B	1.36142	6.3788	8.0656	8.43509e-06	0.000196303	3.85838	ERK240min
Map3k14	MAP3K14	ENSMUST00000021324	mitogen-activated protein kinase kinase kinase 14	1.44355	7.68174	8.06256	8.46417e-06	0.000196703	3.85478	ERK240min
Zfp74	ZNF569		zinc finger protein 74	-1.18162	9.61118	-8.05759	8.51179e-06	0.000197671	3.8489	ERK240min
Aurkc	AURKC		aurora kinase C	-2.49846	10.0219	-8.05201	8.56564e-06	0.000198694	3.84229	ERK240min
Mkx	MKX	ENSMUST00000079788	mohawk homeobox	-2.43817	6.75404	-8.04485	8.63519e-06	0.000199835	3.83382	ERK240min
Nlrp9b	NLRP9	ENSMUST00000073151	NLR family, pyrin domain containing 9B	-2.76853	5.47107	-8.0403	8.6798e-06	0.000200587	3.82842	ERK240min
Dysf	DYSF	ENSMUST00000113823	dysferlin	1.3295	9.48215	8.03922	8.69037e-06	0.000200691	3.82714	ERK240min
Lrrc8c	LRRC8C		leucine rich repeat containing 8 family, member C	2.41549	5.60767	8.03028	8.77879e-06	0.00020225	3.81654	ERK240min
Mapre3	MAPRE3	ENSMUST00000146459	microtubule-associated protein, RP/EB family, member 3	1.2797	7.67578	8.02869	8.79462e-06	0.000202252	3.81465	ERK240min
Nek6	NEK6	ENSMUST00000112895	NIMA (never in mitosis gene a)-related expressed kinase 6	1.14053	10.6887	8.02693	8.81216e-06	0.000202412	3.81256	ERK240min
Krt81	KRT81	ENSMUST00000061185	keratin 81	1.45109	5.43878	8.02676	8.81383e-06	0.000202412	3.81236	ERK240min
Nek5	NEK5		NIMA (never in mitosis gene a)-related expressed kinase 5	-2.08471	4.41898	-8.01769	8.90497e-06	0.000204363	3.80158	ERK240min
Arhgef18	ARHGEF18	ENSMUST00000156085	rho/rac guanine nucleotide exchange factor (GEF) 18	-1.67804	11.7368	-8.01365	8.94578e-06	0.000205158	3.79679	ERK240min
Eif2c1		ENSMUST00000097888	eukaryotic translation initiation factor 2C, 1	-1.53978	9.32164	-8.01194	8.96318e-06	0.000205415	3.79475	ERK240min
Scube2	SCUBE2	ENSMUST00000007423	signal peptide, CUB domain, EGF-like 2	2.16714	7.30481	8.0109	8.9738e-06	0.000205516	3.79351	ERK240min
Ckmt1	CKMT1A	ENSMUST00000000317	creatine kinase, mitochondrial 1, ubiquitous	-1.20775	12.4741	-8.0097	8.98597e-06	0.000205652	3.79209	ERK240min
Xpr1	XPR1	ENSMUST00000139925	xenotropic and polytropic retrovirus receptor 1	-1.17762	6.55533	-8.00711	9.01241e-06	0.00020583	3.78901	ERK240min
Atp1b2	ATP1B2	ENSMUST00000094075	ATPase, Na+/K+ transporting, beta 2 polypeptide	-1.19891	10.516	-7.99641	9.12256e-06	0.000208202	3.77628	ERK240min
Agpat4	AGPAT4		1-acylglycerol-3-phosphate O-acyltransferase 4 (lysophosphatidic acid acyltransferase, delta)	1.03031	13.387	7.99531	9.13396e-06	0.000208319	3.77497	ERK240min
Tmem184a	TMEM184A	ENSMUST00000110832	transmembrane protein 184a	1.41104	7.50425	7.98926	9.19707e-06	0.000209613	3.76776	ERK240min
Hectd1	HECTD1	ENSMUST00000042052	HECT domain containing 1	1.09547	8.7866	7.98612	9.22994e-06	0.000210218	3.76402	ERK240min
Rab39	RAB39A		RAB39, member RAS oncogene family	-1.86449	6.18452	-7.98027	9.29155e-06	0.000211475	3.75704	ERK240min
Mapk12	MAPK12	ENSMUST00000088827	mitogen-activated protein kinase 12	1.64508	9.52188	7.97755	9.3203e-06	0.000211838	3.75381	ERK240min
Smpdl3a	SMPDL3A		sphingomyelin phosphodiesterase, acid-like 3A	-2.96904	5.50745	-7.97567	9.34033e-06	0.000212148	3.75156	ERK240min
Tmsb15b2	TMSB15A	ENSMUST00000069803	thymosin beta 15b2	-1.21945	10.8581	-7.96383	9.46714e-06	0.000214734	3.73742	ERK240min
Setd7	SETD7	ENSMUST00000037141	SET domain containing (lysine methyltransferase) 7	1.00546	9.44995	7.96151	9.49221e-06	0.000215007	3.73465	ERK240min
Fam125b		ENSMUST00000041555	family with sequence similarity 125, member B	-1.98617	11.0149	-7.96042	9.50399e-06	0.000215127	3.73335	ERK240min
Sh3rf3	SH3RF3	ENSMUST00000099724	SH3 domain containing ring finger 3	3.13136	2.97322	7.95766	9.53392e-06	0.000215657	3.73005	ERK240min
Rbp1	RBP1	ENSMUST00000052068	retinol binding protein 1, cellular	1.82012	11.3936	7.95457	9.56752e-06	0.000216062	3.72636	ERK240min
Trim2	TRIM2	ENSMUST00000128574	tripartite motif-containing 2	-2.1732	12.2762	-7.95312	9.58339e-06	0.000216062	3.72463	ERK240min
Hs3st4	HS3ST4	ENSMUST00000106437	heparan sulfate (glucosamine) 3-O-sulfotransferase 4	3.0615	2.75045	7.95302	9.58449e-06	0.000216062	3.72451	ERK240min
Pdlim7	PDLIM7	ENSMUST00000153230	PDZ and LIM domain 7	1.14806	7.67337	7.94474	9.67547e-06	0.000217816	3.7146	ERK240min
Kdm5b	KDM5B	ENSMUST00000047714	lysine (K)-specific demethylase 5B	-1.18117	11.3983	-7.93952	9.73336e-06	0.000218861	3.70835	ERK240min
2010001M09Rik			RIKEN cDNA 2010001M09 gene	1.86145	5.41899	7.93835	9.74629e-06	0.000218964	3.70696	ERK240min
Zfp704	ZNF704		zinc finger protein 704	-2.00708	8.11944	-7.93315	9.80445e-06	0.000220121	3.70072	ERK240min
Gpa33	GPA33	ENSMUST00000060833	glycoprotein A33 (transmembrane)	-1.53838	8.79409	-7.9321	9.81618e-06	0.000220235	3.69947	ERK240min
Aff3	AFF3	ENSMUST00000027250	AF4/FMR2 family, member 3	-1.33876	9.37988	-7.92805	9.86173e-06	0.000221107	3.69462	ERK240min
Pnpla7	PNPLA7	ENSMUST00000155601	patatin-like phospholipase domain containing 7	-1.40745	9.15106	-7.92639	9.88045e-06	0.000221377	3.69263	ERK240min
Gm715			predicted pseudogene 715	-1.54935	6.20999	-7.92548	9.89074e-06	0.000221458	3.69154	ERK240min
Car15		ENSMUST00000118960	carbonic anhydrase 15	-2.03207	5.20667	-7.92207	9.92937e-06	0.000221991	3.68745	ERK240min
Lpar1	LPAR1	ENSMUST00000107566	lysophosphatidic acid receptor 1	-1.27602	5.7993	-7.9216	9.93469e-06	0.000221991	3.68689	ERK240min
Bmp8b	BMP8A		bone morphogenetic protein 8b	1.95394	7.13344	7.91837	9.97151e-06	0.000222513	3.68301	ERK240min
Obsl1	OBSL1		obscurin-like 1	-1.47179	7.96976	-7.91614	9.99701e-06	0.000222932	3.68033	ERK240min
Ankrd10	ANKRD10		ankyrin repeat domain 10	-1.27005	11.2913	-7.90958	1.00723e-05	0.000224219	3.67246	ERK240min
Vcan	VCAN		versican	-1.71503	7.90222	-7.90689	1.01034e-05	0.000224548	3.66923	ERK240min
Sept8	SEPT8	ENSMUST00000108987	septin 8	-1.60158	10.4674	-7.90271	1.01519e-05	0.000225324	3.66421	ERK240min
Fbxo44	FBXO44	ENSMUST00000057907	F-box protein 44	-1.4526	7.82686	-7.89584	1.02322e-05	0.000226649	3.65596	ERK240min
Rnf135	RNF135	ENSMUST00000017839	ring finger protein 135	-1.27643	7.90296	-7.89523	1.02394e-05	0.000226657	3.65522	ERK240min
Osbpl6	OSBPL6	ENSMUST00000063499	oxysterol binding protein-like 6	2.28416	2.4605	7.89448	1.02482e-05	0.0002267	3.65432	ERK240min
AA414992			expressed sequence AA414992	-1.21858	10.4284	-7.88942	1.03079e-05	0.000227766	3.64823	ERK240min
Ppip5k1	PPIP5K1	ENSMUST00000110626	diphosphoinositol pentakisphosphate kinase 1	-1.20667	9.12983	-7.88923	1.03101e-05	0.000227766	3.648	ERK240min
Idh2	IDH2	ENSMUST00000061676	isocitrate dehydrogenase 2 (NADP+), mitochondrial	-1.44399	14.4503	-7.88384	1.03741e-05	0.00022889	3.64152	ERK240min
Csrp2	CSRP2		cysteine and glycine-rich protein 2	-1.06441	15.5217	-7.88377	1.03749e-05	0.00022889	3.64144	ERK240min
Isl1	ISL1	ENSMUST00000036060	ISL1 transcription factor, LIM/homeodomain	-1.94792	3.74699	-7.88133	1.0404e-05	0.000229279	3.6385	ERK240min
Kalrn	KALRN	ENSMUST00000114968	kalirin, RhoGEF kinase	-2.88571	5.31696	-7.88113	1.04064e-05	0.000229279	3.63826	ERK240min
Pstpip2	PSTPIP2		proline-serine-threonine phosphatase-interacting protein 2	1.58854	8.26288	7.87987	1.04215e-05	0.00022946	3.63674	ERK240min
Npc2	NPC2	ENSMUST00000021668	Niemann Pick type C2	-1.12887	13.4927	-7.87893	1.04327e-05	0.000229555	3.6356	ERK240min
Slc2a3	SLC2A3	ENSMUST00000032476	solute carrier family 2 (facilitated glucose transporter), member 3	-1.63421	15.5104	-7.87451	1.04858e-05	0.000230417	3.63028	ERK240min
Enah	ENAH		enabled homolog (Drosophila)	-1.11862	10.2863	-7.87221	1.05136e-05	0.000230874	3.62751	ERK240min
Cdon	CDON		cell adhesion molecule-related/down-regulated by oncogenes	-1.07741	8.96604	-7.86822	1.05619e-05	0.00023178	3.62271	ERK240min
Orai1	ORAI1	ENSMUST00000051016	ORAI calcium release-activated calcium modulator 1	1.0404	8.716	7.86434	1.06092e-05	0.000232664	3.61802	ERK240min
Galnt3	GALNT3	ENSMUST00000028378	UDP-N-acetyl-alpha-D-galactosamine:polypeptide N-acetylgalactosaminyltransferase 3	2.80252	7.30907	7.86375	1.06163e-05	0.000232666	3.61732	ERK240min
Lifr	LIFR		leukemia inhibitory factor receptor	-1.16761	7.27034	-7.85968	1.06662e-05	0.000233296	3.6124	ERK240min
Cebpb	CEBPB	ENSMUST00000070642	CCAAT/enhancer binding protein (C/EBP), beta	1.24836	9.8258	7.85467	1.07279e-05	0.000234335	3.60636	ERK240min
Crocc	CROCC	ENSMUST00000040222	ciliary rootlet coiled-coil, rootletin	-1.66796	10.4081	-7.85073	1.07766e-05	0.000235018	3.60161	ERK240min
Fkbp1b	FKBP1B	ENSMUST00000020964	FK506 binding protein 1b	-1.21677	10.3067	-7.85004	1.07852e-05	0.000235018	3.60077	ERK240min
Zfp42	ZFP42	ENSMUST00000082120	zinc finger protein 42	-1.33816	15.7618	-7.84985	1.07875e-05	0.000235018	3.60054	ERK240min
Nrsn1	NRSN1	ENSMUST00000057866	neurensin 1	-1.36096	8.78856	-7.84648	1.08295e-05	0.000235777	3.59647	ERK240min
Baz1a	BAZ1A		bromodomain adjacent to zinc finger domain 1A	1.88242	6.99964	7.84244	1.088e-05	0.000236235	3.59159	ERK240min
Bmpr1b	BMPR1B	ENSMUST00000029948	bone morphogenetic protein receptor, type 1B	-1.95645	4.28314	-7.84166	1.08898e-05	0.000236235	3.59065	ERK240min
Plcxd2	PLCXD2	ENSMUST00000130481	phosphatidylinositol-specific phospholipase C, X domain containing 2	1.36431	6.90873	7.84092	1.08991e-05	0.000236235	3.58975	ERK240min
Slc5a8	SLC5A8	ENSMUST00000020255	solute carrier family 5 (iodide transporter), member 8	2.28729	3.05304	7.84081	1.09005e-05	0.000236235	3.58962	ERK240min
Slc12a6	SLC12A6	ENSMUST00000028549	solute carrier family 12, member 6	-1.51165	9.55472	-7.832	1.10117e-05	0.000238178	3.57897	ERK240min
Sertad1	SERTAD1		SERTA domain containing 1	1.0766	11.6716	7.82896	1.10505e-05	0.000238515	3.57528	ERK240min
D230025D16Rik	C16orf70	ENSMUST00000034361	RIKEN cDNA D230025D16 gene	-1.5253	11.5457	-7.82851	1.10562e-05	0.000238515	3.57474	ERK240min
March11	MARCH11	ENSMUST00000155819	membrane-associated ring finger (C3HC4) 11	-1.61865	6.87778	-7.82402	1.11136e-05	0.000239242	3.56931	ERK240min
Smpd2	SMPD2	ENSMUST00000132170	sphingomyelin phosphodiesterase 2, neutral	-1.41206	9.50747	-7.82192	1.11406e-05	0.000239556	3.56677	ERK240min
Rftn1	RFTN1	ENSMUST00000044503	raftlin lipid raft linker 1	1.22306	8.04671	7.81956	1.1171e-05	0.000240053	3.56391	ERK240min
Tex264	TEX264		testis expressed gene 264	-1.80024	11.7561	-7.81573	1.12206e-05	0.00024067	3.55926	ERK240min
Brpf3	BRPF3	ENSMUST00000140973	bromodomain and PHD finger containing, 3	-1.90295	10.7205	-7.81566	1.12215e-05	0.00024067	3.55918	ERK240min
Robo1	ROBO1	ENSMUST00000023600	roundabout homolog 1 (Drosophila)	-1.88778	9.98217	-7.81338	1.12511e-05	0.000241148	3.55642	ERK240min
Piwil4	PIWIL4	ENSMUST00000076946	piwi-like homolog 4 (Drosophila)	2.54328	4.8444	7.81218	1.12667e-05	0.000241326	3.55497	ERK240min
Dopey2	DOPEY2		dopey family member 2	-1.11757	10.9842	-7.80774	1.13247e-05	0.000242384	3.54958	ERK240min
Il6st	IL6ST	ENSMUST00000070731	interleukin 6 signal transducer	-1.12722	11.0189	-7.80627	1.13439e-05	0.00024251	3.5478	ERK240min
Tbx4	TBX4	ENSMUST00000000096	T-box 4	-2.67562	4.70641	-7.80501	1.13605e-05	0.000242707	3.54627	ERK240min
Mllt10	MLLT10	ENSMUST00000091418	myeloid/lymphoid or mixed-lineage leukemia (trithorax homolog, Drosophila); translocated to, 10	-1.15513	11.0514	-7.80117	1.1411e-05	0.000243487	3.54162	ERK240min
Birc7	BIRC7	ENSMUST00000087504	baculoviral IAP repeat-containing 7 (livin)	-2.20796	7.64027	-7.80064	1.14181e-05	0.000243487	3.54097	ERK240min
4930502E18Rik			RIKEN cDNA 4930502E18 gene	1.57583	5.88395	7.79831	1.1449e-05	0.000243967	3.53814	ERK240min
Nkx6-2	NKX6-2	ENSMUST00000106095	NK6 homeobox 2	1.19367	6.11763	7.79516	1.14908e-05	0.0002446	3.53431	ERK240min
Srxn1	SRXN1	ENSMUST00000041500	sulfiredoxin 1 homolog (S. cerevisiae)	1.27615	12.5134	7.79495	1.14935e-05	0.0002446	3.53407	ERK240min
1700025G04Rik	C1orf21		RIKEN cDNA 1700025G04 gene	-1.58356	6.49253	-7.79433	1.15017e-05	0.000244619	3.53331	ERK240min
Bglap-rs1		ENSMUST00000107543	bone gamma-carboxyglutamate protein, related sequence 1	1.46367	7.39487	7.79283	1.15217e-05	0.000244875	3.53149	ERK240min
Vegfa	VEGFA	ENSMUST00000113518	vascular endothelial growth factor A	1.69684	7.91942	7.78965	1.15642e-05	0.000245474	3.52763	ERK240min
Mark1	MARK1	ENSMUST00000027929	MAP/microtubule affinity-regulating kinase 1	1.4327	8.39135	7.78648	1.16068e-05	0.000246221	3.52377	ERK240min
H6pd	H6PD		hexose-6-phosphate dehydrogenase (glucose 1-dehydrogenase)	-1.39539	9.38015	-7.78208	1.16662e-05	0.000247163	3.51842	ERK240min
Bglap2	BGLAP	ENSMUST00000098956	bone gamma-carboxyglutamate protein 2	1.46593	6.37373	7.77991	1.16955e-05	0.000247377	3.51579	ERK240min
Pdia2	PDIA2	ENSMUST00000039113	protein disulfide isomerase associated 2	1.58938	4.81108	7.77968	1.16987e-05	0.000247377	3.5155	ERK240min
Tuba1a	TUBA1A		tubulin, alpha 1A	-1.08488	15.4317	-7.77798	1.17217e-05	0.000247704	3.51345	ERK240min
Akr1b3	AKR1B1	ENSMUST00000074150	aldo-keto reductase family 1, member B3 (aldose reductase)	1.38457	13.1335	7.77655	1.17412e-05	0.000247769	3.5117	ERK240min
Naga	NAGA	ENSMUST00000023088	N-acetyl galactosaminidase, alpha	-1.46565	6.31781	-7.7765	1.17418e-05	0.000247769	3.51165	ERK240min
Stard13	STARD13	ENSMUST00000110483	StAR-related lipid transfer (START) domain containing 13	1.96924	5.20164	7.77611	1.17472e-05	0.000247769	3.51116	ERK240min
Mpp1	MPP1	ENSMUST00000033775	membrane protein, palmitoylated	-1.09765	11.3817	-7.7741	1.17745e-05	0.00024803	3.50873	ERK240min
Pitpnc1	PITPNC1	ENSMUST00000103064	phosphatidylinositol transfer protein, cytoplasmic 1	1.43926	9.90236	7.77045	1.18245e-05	0.000248923	3.50429	ERK240min
Schip1	SCHIP1		schwannomin interacting protein 1	-1.44709	9.52558	-7.76462	1.19048e-05	0.000250455	3.49719	ERK240min
Rasl11b	RASL11B	ENSMUST00000051937	RAS-like, family 11, member B	-2.14881	8.42364	-7.76168	1.19455e-05	0.000250993	3.4936	ERK240min
Trim47	TRIM47	ENSMUST00000021120	tripartite motif-containing 47	-3.75216	10.1025	-7.76082	1.19575e-05	0.000251084	3.49256	ERK240min
Rsph1	RSPH1	ENSMUST00000024832	radial spoke head 1 homolog (Chlamydomonas)	-1.13724	6.88247	-7.75756	1.20029e-05	0.000251666	3.48858	ERK240min
Prrx2	PRRX2	ENSMUST00000113592	paired related homeobox 2	1.18607	8.41983	7.75685	1.20128e-05	0.000251666	3.48771	ERK240min
Sigirr	SIGIRR	ENSMUST00000097958	single immunoglobulin and toll-interleukin 1 receptor (TIR) domain	1.53347	12.0686	7.75554	1.2031e-05	0.000251666	3.48613	ERK240min
Gas6	GAS6	ENSMUST00000033828	growth arrest specific 6	-1.9821	10.4454	-7.75501	1.20384e-05	0.000251666	3.48548	ERK240min
6720489N17Rik		ENSMUST00000091563	RIKEN cDNA 6720489N17 gene	-1.34134	6.58588	-7.75041	1.2103e-05	0.000252856	3.47987	ERK240min
Serpinb6e	SERPINB6		serine (or cysteine) peptidase inhibitor, clade B, member 6e	-1.36604	7.45784	-7.74722	1.2148e-05	0.000253636	3.47598	ERK240min
Abl1	ABL1	ENSMUST00000113454	c-abl oncogene 1, non-receptor tyrosine kinase	-1.58993	6.66712	-7.74582	1.21678e-05	0.000253889	3.47427	ERK240min
Palld	PALLD	ENSMUST00000034057	palladin, cytoskeletal associated protein	-1.14199	11.1033	-7.73989	1.22519e-05	0.000255323	3.46704	ERK240min
Cyp4f39	CYP4F22		cytochrome P450, family 4, subfamily f, polypeptide 39	-1.3066	6.43552	-7.72976	1.23974e-05	0.000257867	3.45466	ERK240min
Rab3il1	RAB3IL1	ENSMUST00000025565	RAB3A interacting protein (rabin3)-like 1	-2.05368	10.7855	-7.72722	1.2434e-05	0.000258467	3.45156	ERK240min
Ldb1	LDB1	ENSMUST00000156585	LIM domain binding 1	-1.06238	12.649	-7.72416	1.24784e-05	0.000259227	3.44783	ERK240min
Rab8b	RAB8B	ENSMUST00000041139	RAB8B, member RAS oncogene family	-1.34729	9.30119	-7.7152	1.26095e-05	0.000261458	3.43686	ERK240min
Mybpc3	MYBPC3	ENSMUST00000137942	myosin binding protein C, cardiac	-2.39127	8.08317	-7.71293	1.2643e-05	0.000261824	3.43408	ERK240min
Serpinb5	SERPINB5	ENSMUST00000112729	serine (or cysteine) peptidase inhibitor, clade B, member 5	-1.53716	7.94074	-7.71155	1.26633e-05	0.000262081	3.4324	ERK240min
Itga1	ITGA1	ENSMUST00000061673	integrin alpha 1	3.49936	3.66872	7.7089	1.27025e-05	0.000262728	3.42915	ERK240min
Fzd8	FZD8	ENSMUST00000041080	frizzled homolog 8 (Drosophila)	-1.22401	6.97762	-7.70733	1.27259e-05	0.000263047	3.42723	ERK240min
Anpep	ANPEP	ENSMUST00000049004	alanyl (membrane) aminopeptidase	2.01772	10.6338	7.70069	1.28248e-05	0.000264927	3.4191	ERK240min
Nfatc2ip	NFATC2IP		nuclear factor of activated T-cells, cytoplasmic, calcineurin-dependent 2 interacting protein	-1.32564	12.373	-7.69929	1.28458e-05	0.000265195	3.41738	ERK240min
Crym	CRYM	ENSMUST00000033198	crystallin, mu	1.09473	10.5054	7.69098	1.29713e-05	0.000267451	3.40719	ERK240min
Scube3	SCUBE3	ENSMUST00000043503	signal peptide, CUB domain, EGF-like 3	-2.32023	8.94651	-7.68702	1.30314e-05	0.00026824	3.40233	ERK240min
1700019A02Rik			RIKEN cDNA 1700019A02 gene	1.83504	6.17347	7.68654	1.30387e-05	0.00026824	3.40175	ERK240min
9630033F20Rik	C12orf5	ENSMUST00000039913	RIKEN cDNA 9630033F20 gene	-1.0803	11.4105	-7.68633	1.3042e-05	0.00026824	3.40149	ERK240min
Stard8	STARD8	ENSMUST00000036606	START domain containing 8	-2.74737	8.87188	-7.6841	1.3076e-05	0.000268772	3.39875	ERK240min
Zfp783		ENSMUST00000095946	zinc finger protein 783	1.57025	5.73188	7.68303	1.30923e-05	0.000268942	3.39744	ERK240min
Zfp946		ENSMUST00000088763	zinc finger protein 946	-1.46232	8.55487	-7.67884	1.31567e-05	0.00026973	3.3923	ERK240min
Kcnn4	KCNN4	ENSMUST00000067352	potassium intermediate/small conductance calcium-activated channel, subfamily N, member 4	1.53283	5.37057	7.67869	1.3159e-05	0.00026973	3.39211	ERK240min
Arid2	ARID2	ENSMUST00000058749	AT rich interactive domain 2 (ARID, RFX-like)	1.13238	9.4264	7.67126	1.32741e-05	0.000271495	3.38298	ERK240min
Cdo1	CDO1		cysteine dioxygenase 1, cytosolic	-1.37161	8.68117	-7.67025	1.32897e-05	0.000271648	3.38174	ERK240min
Def6	DEF6		differentially expressed in FDCP 6	1.21454	13.3155	7.66826	1.33208e-05	0.000271947	3.37929	ERK240min
Gyg	GYG1	ENSMUST00000118015	glycogenin	-1.51041	10.4973	-7.66826	1.33208e-05	0.000271947	3.37929	ERK240min
Irf9	IRF9	ENSMUST00000002396	interferon regulatory factor 9	-1.25819	10.247	-7.66691	1.33418e-05	0.000272207	3.37764	ERK240min
Utrn	UTRN	ENSMUST00000076817	utrophin	-1.3862	8.204	-7.66549	1.33641e-05	0.000272327	3.37589	ERK240min
Ahi1	AHI1	ENSMUST00000095801	Abelson helper integration site 1	1.34012	5.1066	7.66388	1.33892e-05	0.000272361	3.37392	ERK240min
Enpp3	ENPP3	ENSMUST00000020169	ectonucleotide pyrophosphatase/phosphodiesterase 3	2.04478	10.9541	7.6638	1.33905e-05	0.000272361	3.37382	ERK240min
Gm996	C9orf172		predicted gene 996	2.05619	4.9378	7.66078	1.34381e-05	0.000273161	3.3701	ERK240min
Evc	EVC	ENSMUST00000031005	Ellis van Creveld gene homolog (human)	-1.21824	9.96545	-7.6579	1.34834e-05	0.000273914	3.36656	ERK240min
Oas2	OAS2	ENSMUST00000081491	2'-5' oligoadenylate synthetase 2	-2.44814	8.28882	-7.65367	1.35506e-05	0.000275111	3.36135	ERK240min
Adora2b	ADORA2B	ENSMUST00000018644	adenosine A2b receptor	1.7128	7.31267	7.6411	1.37519e-05	0.000278553	3.34587	ERK240min
Zfp287	ZNF287	ENSMUST00000108706	zinc finger protein 287	1.40483	6.66237	7.64098	1.37538e-05	0.000278553	3.34573	ERK240min
Ucp1	UCP1	ENSMUST00000034146	uncoupling protein 1 (mitochondrial, proton carrier)	-2.45505	4.94067	-7.63978	1.37734e-05	0.000278778	3.34424	ERK240min
Gm3134			predicted gene 3134	-1.07563	9.56908	-7.6381	1.38005e-05	0.000279156	3.34217	ERK240min
Mtm1	MTM1		X-linked myotubular myopathy gene 1	-2.02096	7.20493	-7.63421	1.38637e-05	0.000280012	3.33738	ERK240min
Eml1	EML1	ENSMUST00000109862	echinoderm microtubule associated protein like 1	-2.25644	8.39786	-7.63331	1.38784e-05	0.000280047	3.33627	ERK240min
2810410L24Rik		ENSMUST00000145437	RIKEN cDNA 2810410L24 gene	-2.34182	5.18821	-7.63166	1.39053e-05	0.00028031	3.33423	ERK240min
Vwf	VWF	ENSMUST00000147101	Von Willebrand factor homolog	-2.23091	9.37988	-7.63148	1.39084e-05	0.00028031	3.334	ERK240min
Tbc1d23	TBC1D23		TBC1 domain family, member 23	1.55427	11.41	7.63002	1.39322e-05	0.00028062	3.33221	ERK240min
Pqlc3	PQLC3	ENSMUST00000140933	PQ loop repeat containing	-1.68214	9.90213	-7.62854	1.39565e-05	0.000280939	3.33038	ERK240min
Lgmn	LGMN	ENSMUST00000021607	legumain	-1.21861	12.0704	-7.62632	1.3993e-05	0.000281502	3.32764	ERK240min
Cbfa2t2	CBFA2T2	ENSMUST00000109720	core-binding factor, runt domain, alpha subunit 2, translocated to, 2 (human)	-1.11432	13.5227	-7.62261	1.40542e-05	0.000282417	3.32306	ERK240min
Dzip1	DZIP1	ENSMUST00000004055	DAZ interacting protein 1	-2.41854	5.0642	-7.62253	1.40555e-05	0.000282417	3.32296	ERK240min
Zmynd15	ZMYND15	ENSMUST00000136029	zinc finger, MYND-type containing 15	1.20094	7.86716	7.62118	1.40778e-05	0.000282693	3.32129	ERK240min
LOC100504146			zinc finger protein 709-like	-1.17833	7.17777	-7.61597	1.41645e-05	0.000283981	3.31486	ERK240min
3632451O06Rik	C14orf37	ENSMUST00000036972	RIKEN cDNA 3632451O06 gene	-1.79919	8.66001	-7.61577	1.41677e-05	0.000283981	3.31461	ERK240min
Fcgrt	FCGRT	ENSMUST00000003512	Fc receptor, IgG, alpha chain transporter	-2.2799	6.69815	-7.61506	1.41796e-05	0.000284048	3.31373	ERK240min
Procr	PROCR	ENSMUST00000143493	protein C receptor, endothelial	1.5994	8.12956	7.61374	1.42017e-05	0.000284317	3.31211	ERK240min
Jakmip1	JAKMIP1	ENSMUST00000043794	janus kinase and microtubule interacting protein 1	-2.15324	9.27068	-7.61148	1.42396e-05	0.000284904	3.30931	ERK240min
Tapbp	TAPBP	ENSMUST00000025161	TAP binding protein	-1.61572	9.59386	-7.60963	1.42705e-05	0.00028535	3.30703	ERK240min
Stat4	STAT4	ENSMUST00000027277	signal transducer and activator of transcription 4	-1.86019	9.66662	-7.60852	1.42892e-05	0.000285552	3.30565	ERK240min
Pdgfra	PDGFRA	ENSMUST00000000476	platelet derived growth factor receptor, alpha polypeptide	2.06713	3.02023	7.59929	1.44456e-05	0.000288154	3.29424	ERK240min
Dhx32	DHX32	ENSMUST00000063669	DEAH (Asp-Glu-Ala-His) box polypeptide 32	-1.2864	12.5826	-7.59312	1.45512e-05	0.000290086	3.28659	ERK240min
Morc1	MORC1		microrchidia 1	-1.21319	12.8149	-7.58985	1.46074e-05	0.000291032	3.28254	ERK240min
Gstm7	GSTM2		glutathione S-transferase, mu 7	-2.10696	5.09747	-7.58104	1.47602e-05	0.000293192	3.27163	ERK240min
Coro1a	CORO1A	ENSMUST00000106364	coronin, actin binding protein 1A	1.79837	10.4602	7.57699	1.48309e-05	0.000294421	3.26661	ERK240min
Slc7a7	SLC7A7	ENSMUST00000000984	solute carrier family 7 (cationic amino acid transporter, y+ system), member 7	2.5522	13.6636	7.57357	1.4891e-05	0.000295259	3.26237	ERK240min
Eif4e2	EIF4E2	ENSMUST00000076362	eukaryotic translation initiation factor 4E member 2	-1.53907	5.15837	-7.57118	1.49331e-05	0.000295916	3.25941	ERK240min
Nrip3	NRIP3	ENSMUST00000033331	nuclear receptor interacting protein 3	2.20229	7.79418	7.56631	1.50194e-05	0.000297449	3.25335	ERK240min
Dok2	DOK2	ENSMUST00000022698	docking protein 2	2.19888	10.5824	7.56279	1.50821e-05	0.000298147	3.24898	ERK240min
Loxl2	LOXL2	ENSMUST00000100420	lysyl oxidase-like 2	-1.38553	8.09668	-7.56262	1.50851e-05	0.000298147	3.24877	ERK240min
Tigd5	TIGD5		tigger transposable element derived 5	2.2701	3.22547	7.56201	1.5096e-05	0.000298147	3.24802	ERK240min
Marveld3	MARVELD3		MARVEL (membrane-associating) domain containing 3	1.1864	6.8092	7.5618	1.50997e-05	0.000298147	3.24776	ERK240min
Leprel2	LEPREL2	ENSMUST00000126987	leprecan-like 2	-1.37253	7.37818	-7.56056	1.5122e-05	0.000298409	3.24621	ERK240min
Naaa	NAAA	ENSMUST00000113102	N-acylethanolamine acid amidase	-3.07632	11.247	-7.55797	1.51683e-05	0.000299144	3.24301	ERK240min
9930012K11Rik	C8orf58	ENSMUST00000140314	RIKEN cDNA 9930012K11 gene	1.77027	8.12393	7.55303	1.52572e-05	0.000300467	3.23687	ERK240min
Slc1a1	SLC1A1	ENSMUST00000025875	solute carrier family 1 (neuronal/epithelial high affinity glutamate transporter, system Xag), member 1	-1.65048	7.13112	-7.55224	1.52717e-05	0.000300467	3.23588	ERK240min
Folr1	FOLR1		folate receptor 1 (adult)	-1.18028	12.5664	-7.55018	1.53089e-05	0.000300842	3.23332	ERK240min
Timp1	TIMP1	ENSMUST00000009530	tissue inhibitor of metalloproteinase 1	-1.0223	13.3821	-7.54818	1.53452e-05	0.000301376	3.23083	ERK240min
Hoxb1	HOXB1	ENSMUST00000123805	homeobox B1	1.79392	2.34038	7.54764	1.53551e-05	0.000301391	3.23016	ERK240min
H2afy	H2AFY		H2A histone family, member Y	-1.35445	11.4203	-7.5408	1.54801e-05	0.000303485	3.22165	ERK240min
Alg13		ENSMUST00000154827	asparagine-linked glycosylation 13 homolog (S. cerevisiae)	-1.51743	13.0818	-7.53514	1.55844e-05	0.000305046	3.2146	ERK240min
Celsr3	CELSR3	ENSMUST00000024238	cadherin, EGF LAG seven-pass G-type receptor 3 (flamingo homolog, Drosophila)	-1.07997	10.3603	-7.53498	1.55874e-05	0.000305046	3.2144	ERK240min
Hs6st2	HS6ST2		heparan sulfate 6-O-sulfotransferase 2	2.20824	7.06207	7.53445	1.5597e-05	0.000305055	3.21375	ERK240min
Slc45a4	SLC45A4	ENSMUST00000054266	solute carrier family 45, member 4	-1.59697	10.8081	-7.53349	1.56148e-05	0.000305222	3.21255	ERK240min
Adamts8	ADAMTS8	ENSMUST00000163037	a disintegrin-like and metallopeptidase (reprolysin type) with thrombospondin type 1 motif, 8	-2.33227	7.46995	-7.52021	1.58631e-05	0.000309196	3.196	ERK240min
Cd1d2	CD1D		CD1d2 antigen	-1.14986	7.66602	-7.51974	1.58719e-05	0.000309196	3.19541	ERK240min
Zcchc24	ZCCHC24		zinc finger, CCHC domain containing 24	-2.05043	9.98908	-7.5197	1.58726e-05	0.000309196	3.19536	ERK240min
AU018091			expressed sequence AU018091	-1.48693	8.12067	-7.51945	1.58773e-05	0.000309196	3.19505	ERK240min
Ccdc164			coiled-coil domain containing 164	-1.16007	9.16052	-7.51838	1.58975e-05	0.000309256	3.19372	ERK240min
Tbc1d13	TBC1D13		TBC1 domain family, member 13	-1.43489	11.6228	-7.51797	1.59053e-05	0.000309256	3.19321	ERK240min
A930024E05Rik			RIKEN cDNA A930024E05 gene	2.27969	4.42628	7.51689	1.59258e-05	0.000309473	3.19185	ERK240min
Chst12	CHST12	ENSMUST00000043050	carbohydrate sulfotransferase 12	-1.60106	9.12884	-7.51432	1.59746e-05	0.000310128	3.18865	ERK240min
Epb4.9		ENSMUST00000022694	erythrocyte protein band 4.9	-1.38865	10.4805	-7.51412	1.59782e-05	0.000310128	3.1884	ERK240min
Phf12	PHF12	ENSMUST00000049167	PHD finger protein 12	-1.02682	10.1318	-7.50906	1.60747e-05	0.000311635	3.18209	ERK240min
Slc15a1	SLC15A1		solute carrier family 15 (oligopeptide transporter), member 1	-2.82976	4.78766	-7.50296	1.61917e-05	0.00031372	3.17447	ERK240min
Snai2	SNAI2	ENSMUST00000023356	snail homolog 2 (Drosophila)	-2.25038	6.02204	-7.5013	1.62239e-05	0.000314158	3.17239	ERK240min
Lrrc31			leucine rich repeat containing 31	-2.9224	9.09378	-7.49958	1.6257e-05	0.000314466	3.17025	ERK240min
Calr	CALR	ENSMUST00000003912	calreticulin	-1.16748	13.815	-7.49949	1.62588e-05	0.000314466	3.17014	ERK240min
Mthfr	MTHFR	ENSMUST00000156113	5,10-methylenetetrahydrofolate reductase	-1.18189	11.2855	-7.49895	1.62692e-05	0.000314485	3.16946	ERK240min
Bin2		ENSMUST00000100198	bridging integrator 2	1.26049	8.25717	7.48416	1.65586e-05	0.000319704	3.15096	ERK240min
Nfe2	NFE2	ENSMUST00000134554	nuclear factor, erythroid derived 2	-2.87729	5.5607	-7.48236	1.65941e-05	0.000320025	3.1487	ERK240min
Kcne3	KCNE3		potassium voltage-gated channel, Isk-related subfamily, gene 3	2.07758	2.54978	7.48031	1.66348e-05	0.000320614	3.14614	ERK240min
Tle4	TLE4	ENSMUST00000087726	transducin-like enhancer of split 4, homolog of Drosophila E(spl)	1.17902	8.89024	7.47841	1.66724e-05	0.000321147	3.14376	ERK240min
Gabra5	GABRA5	ENSMUST00000068456	gamma-aminobutyric acid (GABA) A receptor, subunit alpha 5	1.21898	2.21122	7.47241	1.67922e-05	0.000322897	3.13625	ERK240min
Cyth1	CYTH1	ENSMUST00000106305	cytohesin 1	-1.0639	8.09015	-7.46875	1.68657e-05	0.000324079	3.13166	ERK240min
Tram1l1	TRAM1L1		translocation associated membrane protein 1-like 1	1.36374	6.22789	7.4672	1.68971e-05	0.000324347	3.12971	ERK240min
Zadh2	ZADH2		zinc binding alcohol dehydrogenase, domain containing 2	1.35024	8.73503	7.46467	1.69481e-05	0.000325139	3.12655	ERK240min
Kcnk5	KCNK5	ENSMUST00000024011	potassium channel, subfamily K, member 5	-1.45757	10.0641	-7.46403	1.6961e-05	0.000325198	3.12575	ERK240min
Akap2	AKAP2	ENSMUST00000071723	A kinase (PRKA) anchor protein 2	-1.09713	12.5232	-7.46286	1.69848e-05	0.000325466	3.12427	ERK240min
Hr	HR	ENSMUST00000022691	hairless	-1.41242	8.19912	-7.46021	1.70387e-05	0.000326262	3.12095	ERK240min
Gfpt2	GFPT2	ENSMUST00000020629	glutamine fructose-6-phosphate transaminase 2	-1.03219	12.6325	-7.45932	1.70567e-05	0.000326262	3.11984	ERK240min
Ccdc61	CCDC61		coiled-coil domain containing 61	-1.14108	12.9068	-7.459	1.70633e-05	0.000326262	3.11943	ERK240min
Mobkl2b			MOB1, Mps One Binder kinase activator-like 2B (yeast)	1.31298	7.31304	7.45888	1.70658e-05	0.000326262	3.11928	ERK240min
Elovl1	ELOVL1	ENSMUST00000067896	elongation of very long chain fatty acids (FEN1/Elo2, SUR4/Elo3, yeast)-like 1	1.13088	8.8702	7.45494	1.71463e-05	0.000327612	3.11434	ERK240min
Cryge	CRYGD	ENSMUST00000087359	crystallin, gamma E	-1.86109	4.73339	-7.45386	1.71684e-05	0.000327845	3.11299	ERK240min
Tcn2	TCN2		transcobalamin 2	-1.292	11.8294	-7.4522	1.72027e-05	0.00032831	3.11089	ERK240min
Dlgap1	DLGAP1		discs, large (Drosophila) homolog-associated protein 1	-2.09267	5.41207	-7.4503	1.72418e-05	0.000328866	3.10851	ERK240min
Dnajb5	DNAJB5	ENSMUST00000142332	DnaJ (Hsp40) homolog, subfamily B, member 5	1.17699	10.42	7.44893	1.72701e-05	0.000329216	3.10679	ERK240min
Ahr	AHR	ENSMUST00000110811	aryl-hydrocarbon receptor	-1.24481	9.09872	-7.44522	1.73469e-05	0.00032992	3.10213	ERK240min
Cxcr7			chemokine (C-X-C motif) receptor 7	-2.82023	7.78175	-7.44461	1.73596e-05	0.000329972	3.10136	ERK240min
BC065397		ENSMUST00000134066	cDNA sequence BC065397	-1.12045	7.67552	-7.43862	1.74845e-05	0.000331895	3.09384	ERK240min
Akap1	AKAP1	ENSMUST00000143720	A kinase (PRKA) anchor protein 1	-1.20568	11.7081	-7.43832	1.74908e-05	0.000331895	3.09346	ERK240min
Hs6st1	HS6ST1		heparan sulfate 6-O-sulfotransferase 1	-2.25965	9.81305	-7.43024	1.76609e-05	0.000334492	3.0833	ERK240min
Upk2	UPK2	ENSMUST00000047740	uroplakin 2	1.10391	8.22334	7.42517	1.77686e-05	0.000336023	3.07692	ERK240min
Vangl1	VANGL1	ENSMUST00000159388	vang-like 1 (van gogh, Drosophila)	-1.55737	11.8883	-7.42439	1.77851e-05	0.000336023	3.07594	ERK240min
Tmem181a	TMEM181	ENSMUST00000031589	transmembrane protein 181A	1.03784	9.43081	7.42297	1.78155e-05	0.00033632	3.07415	ERK240min
Sox4	SOX4	ENSMUST00000110326	SRY-box containing gene 4	1.38894	8.70744	7.41845	1.79122e-05	0.000337953	3.06846	ERK240min
Epha1	EPHA1	ENSMUST00000073387	Eph receptor A1	2.60623	9.76489	7.41704	1.79425e-05	0.000338192	3.06669	ERK240min
Cadps	CADPS		Ca2+-dependent secretion activator	-1.43766	5.04934	-7.41691	1.79453e-05	0.000338192	3.06652	ERK240min
LOC100045796		ENSMUST00000109600	cysteine desulfurase, mitochondrial-like	-1.15448	8.5984	-7.41557	1.79744e-05	0.000338354	3.06483	ERK240min
Dusp22	DUSP22		dual specificity phosphatase 22	1.43922	7.56726	7.4125	1.80406e-05	0.000339215	3.06096	ERK240min
Igf1	IGF1		insulin-like growth factor 1	-3.55866	6.38817	-7.40632	1.81751e-05	0.000341356	3.05317	ERK240min
Arhgap31	ARHGAP31		Rho GTPase activating protein 31	2.5102	4.48732	7.40012	1.83109e-05	0.000343322	3.04535	ERK240min
Slc6a7	SLC6A7	ENSMUST00000025520	solute carrier family 6 (neurotransmitter transporter, L-proline), member 7	-1.36873	6.11652	-7.3995	1.83247e-05	0.000343385	3.04456	ERK240min
Mib2	MIB2	ENSMUST00000103176	mindbomb homolog 2 (Drosophila)	-1.20212	13.1117	-7.39802	1.83573e-05	0.000343608	3.04269	ERK240min
Fut1	FUT1		fucosyltransferase 1	2.59748	6.39057	7.39453	1.84343e-05	0.000344855	3.0383	ERK240min
Kcp	KCP	ENSMUST00000101614	kielin/chordin-like protein	-1.38836	8.671	-7.39134	1.85053e-05	0.000345987	3.03426	ERK240min
Wfdc15a		ENSMUST00000063251	WAP four-disulfide core domain 15A	1.22563	6.64664	7.3866	1.86111e-05	0.000347572	3.02828	ERK240min
Ap3b2	AP3B2	ENSMUST00000082090	adaptor-related protein complex 3, beta 2 subunit	-2.30171	11.1431	-7.386	1.86245e-05	0.000347626	3.02752	ERK240min
Pmepa1	PMEPA1	ENSMUST00000109115	prostate transmembrane protein, androgen induced 1	-2.24976	7.44455	-7.3844	1.86604e-05	0.000348042	3.0255	ERK240min
2610524H06Rik		ENSMUST00000100850	RIKEN cDNA 2610524H06 gene	-1.0016	10.7838	-7.38335	1.86841e-05	0.00034815	3.02417	ERK240min
Arhgef19	ARHGEF19	ENSMUST00000105792	Rho guanine nucleotide exchange factor (GEF) 19	-1.28633	7.15722	-7.38251	1.87029e-05	0.000348303	3.02311	ERK240min
Zfp40	ZNF28		zinc finger protein 40	-1.24763	7.216	-7.38124	1.87316e-05	0.000348641	3.0215	ERK240min
Tmem51	TMEM51		transmembrane protein 51	-2.05278	10.8635	-7.3731	1.89162e-05	0.000351681	3.01121	ERK240min
Galnt9	GALNT9		UDP-N-acetyl-alpha-D-galactosamine:polypeptide N-acetylgalactosaminyltransferase 9	-2.00565	7.03817	-7.37195	1.89424e-05	0.000351971	3.00975	ERK240min
Pramef12	PRAMEF12		PRAME family member 12	-1.33076	12.9703	-7.37064	1.89723e-05	0.000352328	3.0081	ERK240min
Dennd1c	DENND1C		DENN/MADD domain containing 1C	-1.32295	8.56586	-7.36868	1.90172e-05	0.000352716	3.00561	ERK240min
Crip1	CRIP1		cysteine-rich protein 1 (intestinal)	-1.3062	14.2396	-7.36751	1.90441e-05	0.000352716	3.00413	ERK240min
Entpd3	ENTPD3		ectonucleoside triphosphate diphosphohydrolase 3	3.68433	3.67605	7.3674	1.90464e-05	0.000352716	3.004	ERK240min
Tgm2	TGM2	ENSMUST00000103122	transglutaminase 2, C polypeptide	-2.19021	8.44369	-7.36591	1.90809e-05	0.000352959	3.0021	ERK240min
Med14	MED14	ENSMUST00000096495	mediator complex subunit 14	1.16219	10.4236	7.36087	1.91972e-05	0.000354578	2.99572	ERK240min
Scn2b	SCN2B	ENSMUST00000093855	sodium channel, voltage-gated, type II, beta	1.13728	6.41658	7.35612	1.93074e-05	0.000355775	2.98971	ERK240min
Brwd1	BRWD1	ENSMUST00000113829	bromodomain and WD repeat domain containing 1	-1.36824	7.57128	-7.35516	1.93299e-05	0.000355775	2.98849	ERK240min
Slc5a5	SLC5A5	ENSMUST00000000809	solute carrier family 5 (sodium iodide symporter), member 5	1.75941	5.2503	7.35413	1.93539e-05	0.00035602	2.98718	ERK240min
Car4	CA4	ENSMUST00000127827	carbonic anhydrase 4	2.68054	4.94421	7.34693	1.9523e-05	0.000358333	2.97805	ERK240min
Gjc1	GJC1	ENSMUST00000107075	gap junction protein, gamma 1	-1.41692	10.6435	-7.33375	1.98363e-05	0.000363278	2.96133	ERK240min
Nr6a1	NR6A1	ENSMUST00000112875	nuclear receptor subfamily 6, group A, member 1	1.12975	7.72387	7.33294	1.98557e-05	0.000363433	2.9603	ERK240min
Ccdc141	CCDC141	ENSMUST00000028406	coiled-coil domain containing 141	1.1587	6.43791	7.33226	1.98723e-05	0.000363464	2.95943	ERK240min
Ak7	AK7	ENSMUST00000040876	adenylate kinase 7	-1.92431	7.87371	-7.32204	2.01196e-05	0.000366639	2.94644	ERK240min
Plekhf2	PLEKHF2	ENSMUST00000054776	pleckstrin homology domain containing, family F (with FYVE domain) member 2	-1.57983	11.6283	-7.31435	2.03078e-05	0.000369663	2.93666	ERK240min
Pdzrn4	PDZRN4		PDZ domain containing RING finger 4	1.10244	5.22024	7.3126	2.03508e-05	0.000370039	2.93444	ERK240min
Lix1l	LIX1L	ENSMUST00000062058	Lix1-like	-1.32803	7.18044	-7.30713	2.04863e-05	0.000372298	2.92747	ERK240min
Ext1	EXT1	ENSMUST00000133362	exostoses (multiple) 1	1.36097	10.663	7.30603	2.05138e-05	0.000372591	2.92607	ERK240min
LOC547349			similar to MHC class I antigen precursor	-1.21645	7.19272	-7.30106	2.06377e-05	0.000374637	2.91974	ERK240min
Ihh	IHH	ENSMUST00000006713	Indian hedgehog	-1.01454	5.13568	-7.30033	2.0656e-05	0.00037466	2.91881	ERK240min
Fig4	FIG4	ENSMUST00000043814	FIG4 homolog (S. cerevisiae)	-1.1727	11.6056	-7.30011	2.06616e-05	0.00037466	2.91853	ERK240min
Wipi1	WIPI1	ENSMUST00000103060	WD repeat domain, phosphoinositide interacting 1	-1.36341	8.27016	-7.2922	2.08608e-05	0.000377582	2.90845	ERK240min
Trim28	TRIM28	ENSMUST00000123778	tripartite motif-containing 28	-1.06904	16.1615	-7.28999	2.0917e-05	0.000378255	2.90562	ERK240min
4930415F15Rik	C7orf72	ENSMUST00000109678	RIKEN cDNA 4930415F15 gene	1.5366	4.5339	7.28947	2.09302e-05	0.000378286	2.90496	ERK240min
Taf1b	TAF1B	ENSMUST00000075954	TATA box binding protein (Tbp)-associated factor, RNA polymerase I, B	-1.15921	7.98732	-7.28552	2.10308e-05	0.000379898	2.89993	ERK240min
Krt17	KRT17	ENSMUST00000107407	keratin 17	-1.723	10.6973	-7.28387	2.1073e-05	0.000380416	2.89782	ERK240min
Phf2	PHF2	ENSMUST00000035540	PHD finger protein 2	1.03451	6.05567	7.28342	2.10845e-05	0.000380416	2.89725	ERK240min
Btrc	BTRC		beta-transducin repeat containing protein	-1.40548	7.65655	-7.28284	2.10995e-05	0.000380416	2.8965	ERK240min
Zfp811			zinc finger protein 811	-1.71939	6.56664	-7.28084	2.11509e-05	0.000380819	2.89395	ERK240min
Serpinb6c	SERPINB6		serine (or cysteine) peptidase inhibitor, clade B, member 6c	-1.09801	13.7129	-7.27766	2.12327e-05	0.000382084	2.88989	ERK240min
D16H22S680E		ENSMUST00000013683	DNA segment, Chr 16, human D22S680E, expressed	-1.02372	10.3071	-7.27232	2.13712e-05	0.000383951	2.88306	ERK240min
Zfp608	ZNF608	ENSMUST00000064763	zinc finger protein 608	2.38272	6.15947	7.27128	2.13981e-05	0.000384225	2.88174	ERK240min
Pdzd2	PDZD2	ENSMUST00000037635	PDZ domain containing 2	-1.93621	4.98355	-7.26592	2.15382e-05	0.000386038	2.87489	ERK240min
Furin	FURIN	ENSMUST00000120753	furin (paired basic amino acid cleaving enzyme)	1.06216	8.70778	7.26563	2.15457e-05	0.000386038	2.87452	ERK240min
Tac2	TAC3	ENSMUST00000026466	tachykinin 2	-1.95428	5.46749	-7.26201	2.1641e-05	0.00038708	2.86989	ERK240min
Pbxip1	PBXIP1	ENSMUST00000038942	pre-B-cell leukemia transcription factor interacting protein 1	-1.48563	11.3058	-7.26153	2.16537e-05	0.00038708	2.86927	ERK240min
Alox12e			arachidonate lipoxygenase, epidermal	-2.00042	7.09884	-7.26148	2.16549e-05	0.00038708	2.86921	ERK240min
Mfng	MFNG	ENSMUST00000018313	MFNG O-fucosylpeptide 3-beta-N-acetylglucosaminyltransferase	1.05477	10.4133	7.2612	2.16623e-05	0.00038708	2.86885	ERK240min
Slc41a3	SLC41A3	ENSMUST00000044019	solute carrier family 41, member 3	-2.40313	7.6033	-7.25821	2.17415e-05	0.000388075	2.86502	ERK240min
Rab7l1			RAB7, member RAS oncogene family-like 1	-1.25059	9.51663	-7.25717	2.17689e-05	0.000388354	2.8637	ERK240min
Hadh	HADH	ENSMUST00000029610	hydroxyacyl-Coenzyme A dehydrogenase	-1.4202	12.8177	-7.25646	2.1788e-05	0.000388485	2.86278	ERK240min
Clybl	CLYBL		citrate lyase beta like	-1.13525	8.66506	-7.25513	2.18232e-05	0.000388905	2.86108	ERK240min
Cytl1	CYTL1		cytokine-like 1	2.41265	4.32778	7.25345	2.18679e-05	0.000389492	2.85893	ERK240min
Hk1	HK1	ENSMUST00000072357	hexokinase 1	-1.87804	13.1286	-7.24798	2.20142e-05	0.000391675	2.85193	ERK240min
Zswim4	ZSWIM4		zinc finger, SWIM domain containing 4	1.1915	7.11355	7.24545	2.20822e-05	0.000392135	2.84869	ERK240min
Mtap7d3	MAP7D3	ENSMUST00000088660	MAP7 domain containing 3	-1.10209	11.4388	-7.24458	2.21057e-05	0.000392135	2.84757	ERK240min
Sall1	SALL1	ENSMUST00000034090	sal-like 1 (Drosophila)	-1.18552	10.6875	-7.24134	2.21932e-05	0.000392749	2.84342	ERK240min
2410004A20Rik		ENSMUST00000034737	RIKEN cDNA 2410004A20 gene	-2.48674	11.865	-7.2394	2.22459e-05	0.00039347	2.84094	ERK240min
Bach2	BACH2	ENSMUST00000108180	BTB and CNC homology 2	3.67304	4.84432	7.23887	2.22603e-05	0.000393514	2.84026	ERK240min
Ms4a7	MS4A7	ENSMUST00000056035	membrane-spanning 4-domains, subfamily A, member 7	-1.93416	5.20876	-7.23268	2.24292e-05	0.000395444	2.83232	ERK240min
Fn1	FN1	ENSMUST00000097700	fibronectin 1	-1.12982	15.1328	-7.21784	2.28398e-05	0.000401087	2.81326	ERK240min
Itga4	ITGA4	ENSMUST00000099972	integrin alpha 4	3.4063	2.69104	7.21639	2.28801e-05	0.00040147	2.81141	ERK240min
Rbm47	RBM47		RNA binding motif protein 47	-1.19891	8.29594	-7.21278	2.29815e-05	0.000402608	2.80677	ERK240min
Bspry	BSPRY		B-box and SPRY domain containing	1.34085	11.7678	7.21011	2.30568e-05	0.000403074	2.80333	ERK240min
Zfp36l2	ZFP36L2		zinc finger protein 36, C3H type-like 2	1.48904	12.6822	7.20809	2.31139e-05	0.000403858	2.80073	ERK240min
Aqp3	AQP3	ENSMUST00000055327	aquaporin 3	-2.91169	11.5206	-7.20231	2.3278e-05	0.000406297	2.7933	ERK240min
Tubg2	TUBG2	ENSMUST00000043654	tubulin, gamma 2	1.02305	8.08975	7.19915	2.33684e-05	0.000407659	2.78923	ERK240min
Dcp2	DCP2	ENSMUST00000025350	DCP2 decapping enzyme homolog (S. cerevisiae)	-1.06243	8.0521	-7.19632	2.34494e-05	0.000408642	2.7856	ERK240min
Sccpdh	SCCPDH	ENSMUST00000040538	saccharopine dehydrogenase (putative)	1.57082	11.3978	7.19498	2.3488e-05	0.000409099	2.78387	ERK240min
Trfr2			transferrin receptor 2	1.31233	6.84823	7.19431	2.35072e-05	0.000409219	2.78301	ERK240min
Ccdc3	CCDC3	ENSMUST00000027988	coiled-coil domain containing 3	3.30528	4.42833	7.18483	2.37821e-05	0.000413786	2.7708	ERK240min
Soat2	SOAT2	ENSMUST00000023806	sterol O-acyltransferase 2	1.32431	8.8689	7.18258	2.38479e-05	0.000414712	2.7679	ERK240min
Sv2c	SV2C	ENSMUST00000161263	synaptic vesicle glycoprotein 2c	-2.58719	3.92212	-7.181	2.38942e-05	0.0004153	2.76586	ERK240min
Lrrk2	LRRK2	ENSMUST00000137657	leucine-rich repeat kinase 2	1.02285	7.81682	7.17818	2.39772e-05	0.000415962	2.76222	ERK240min
Penk	PENK		preproenkephalin	-1.38745	8.41907	-7.17751	2.39969e-05	0.000415962	2.76135	ERK240min
Marveld2	MARVELD2		MARVEL (membrane-associating) domain containing 2	1.43224	7.68633	7.17734	2.40018e-05	0.000415962	2.76114	ERK240min
Iqsec3	IQSEC3	ENSMUST00000129815	IQ motif and Sec7 domain 3	2.68676	3.03608	7.17714	2.40077e-05	0.000415962	2.76088	ERK240min
Oxnad1	OXNAD1		oxidoreductase NAD-binding domain containing 1	1.18221	11.8874	7.17418	2.40951e-05	0.000417039	2.75706	ERK240min
Hebp1	HEBP1	ENSMUST00000045855	heme binding protein 1	-1.22839	11.4044	-7.17303	2.41292e-05	0.000417411	2.75558	ERK240min
Edn1	EDN1	ENSMUST00000021796	endothelin 1	-1.70643	4.52566	-7.16793	2.4281e-05	0.000419817	2.74899	ERK240min
D330045A20Rik	CXorf57	ENSMUST00000113030	RIKEN cDNA D330045A20 gene	2.17102	6.91205	7.16677	2.43157e-05	0.00041995	2.74749	ERK240min
Ush2a	USH2A	ENSMUST00000060479	Usher syndrome 2A (autosomal recessive, mild) homolog (human)	1.93498	2.84948	7.1664	2.43267e-05	0.00041995	2.74701	ERK240min
Gjb3	GJB3		gap junction protein, beta 3	-2.23141	13.7979	-7.16324	2.44212e-05	0.000420711	2.74294	ERK240min
Gstm4	GSTM4		glutathione S-transferase, mu 4	-1.29939	9.12576	-7.16323	2.44217e-05	0.000420711	2.74292	ERK240min
Hhat	HHAT		hedgehog acyltransferase	-3.09811	6.68921	-7.1607	2.44977e-05	0.000421639	2.73965	ERK240min
Slc7a9	SLC7A9	ENSMUST00000118383	solute carrier family 7 (cationic amino acid transporter, y+ system), member 9	-3.07219	5.18828	-7.16025	2.45114e-05	0.000421639	2.73907	ERK240min
Mvp	MVP	ENSMUST00000032919	major vault protein	1.0139	10.1188	7.15786	2.45835e-05	0.000422619	2.73598	ERK240min
Psip1	PSIP1	ENSMUST00000030207	PC4 and SFRS1 interacting protein 1	-1.06247	12.838	-7.1497	2.48315e-05	0.000426339	2.72544	ERK240min
Nfu1	NFU1	ENSMUST00000032060	NFU1 iron-sulfur cluster scaffold homolog (S. cerevisiae)	1.34309	15.0461	7.14947	2.48385e-05	0.000426339	2.72514	ERK240min
Psme2	PSME2	ENSMUST00000159297	proteasome (prosome, macropain) 28 subunit, beta	-1.07425	12.3379	-7.14282	2.50428e-05	0.000429551	2.71654	ERK240min
BC032203			cDNA sequence BC032203	-1.17276	10.8924	-7.14254	2.50516e-05	0.000429551	2.71617	ERK240min
Hes3	HES3	ENSMUST00000094438	hairy and enhancer of split 3 (Drosophila)	-3.16807	5.42081	-7.13818	2.51865e-05	0.00043164	2.71053	ERK240min
Ncbp2	NCBP2	ENSMUST00000023460	nuclear cap binding protein subunit 2	-1.09532	10.215	-7.13714	2.52187e-05	0.000431968	2.70918	ERK240min
Arhgef10	ARHGEF10	ENSMUST00000162636	Rho guanine nucleotide exchange factor (GEF) 10	-1.44074	6.18416	-7.13595	2.52559e-05	0.000432381	2.70764	ERK240min
Svil	SVIL	ENSMUST00000129543	supervillin	-1.41272	10.8658	-7.12945	2.54589e-05	0.000434958	2.69922	ERK240min
Gfra2	GFRA2	ENSMUST00000110968	glial cell line derived neurotrophic factor family receptor alpha 2	-2.32409	7.34299	-7.12346	2.56479e-05	0.000437509	2.69146	ERK240min
Prkca	PRKCA	ENSMUST00000100302	protein kinase C, alpha	-1.4614	7.17717	-7.11962	2.57699e-05	0.000439088	2.68647	ERK240min
Brsk2	BRSK2	ENSMUST00000018971	BR serine/threonine kinase 2	1.67446	4.01144	7.11929	2.57803e-05	0.000439088	2.68605	ERK240min
Inpp1	INPP1	ENSMUST00000027271	inositol polyphosphate-1-phosphatase	1.35193	6.14163	7.11699	2.58536e-05	0.000439798	2.68306	ERK240min
Thrsp	THRSP		thyroid hormone responsive SPOT14 homolog (Rattus)	-1.89619	6.68183	-7.11356	2.59633e-05	0.00044107	2.67862	ERK240min
Pi16	PI16	ENSMUST00000114701	peptidase inhibitor 16	-1.87722	6.95308	-7.11151	2.60294e-05	0.000441965	2.67595	ERK240min
Dnajc6	DNAJC6		DnaJ (Hsp40) homolog, subfamily C, member 6	-1.55065	5.41615	-7.1068	2.61813e-05	0.000443825	2.66983	ERK240min
Hprt	HPRT1	ENSMUST00000026723	hypoxanthine guanine phosphoribosyl transferase	1.1292	5.89526	7.10602	2.62065e-05	0.000443825	2.66882	ERK240min
1700037C18Rik	C16orf90		RIKEN cDNA 1700037C18 gene	1.15684	7.15711	7.10542	2.62258e-05	0.000443825	2.66805	ERK240min
Kiss1	KISS1		KiSS-1 metastasis-suppressor	-3.17014	6.04558	-7.10521	2.62328e-05	0.000443825	2.66777	ERK240min
Nelf			nasal embryonic LHRH factor	1.43063	8.88386	7.10443	2.62579e-05	0.000444023	2.66676	ERK240min
Socs2	SOCS2		suppressor of cytokine signaling 2	1.05631	12.4216	7.10327	2.62959e-05	0.000444208	2.66524	ERK240min
Lnx2	LNX2		ligand of numb-protein X 2	1.13163	8.91932	7.10305	2.63029e-05	0.000444208	2.66496	ERK240min
Npb	NPB		neuropeptide B	-1.01426	7.56634	-7.10286	2.63091e-05	0.000444208	2.66472	ERK240min
Casp9	CASP9	ENSMUST00000030747	caspase 9	-1.21278	11.3203	-7.09572	2.65424e-05	0.00044765	2.65544	ERK240min
Tekt1	TEKT1		tektin 1	-1.43384	10.3756	-7.09238	2.66526e-05	0.000448908	2.65109	ERK240min
2610008E11Rik	ZNF37A		RIKEN cDNA 2610008E11 gene	-1.10273	7.10177	-7.0923	2.66553e-05	0.000448908	2.65098	ERK240min
Lyn	LYN	ENSMUST00000103010	Yamaguchi sarcoma viral (v-yes-1) oncogene homolog	2.67742	4.4235	7.09044	2.67165e-05	0.00044971	2.64857	ERK240min
Cebpe	CEBPE	ENSMUST00000064290	CCAAT/enhancer binding protein (C/EBP), epsilon	1.92297	5.13502	7.08871	2.67738e-05	0.000450216	2.64632	ERK240min
B4galnt4	B4GALNT4	ENSMUST00000048002	beta-1,4-N-acetyl-galactosaminyl transferase 4	-1.00722	8.71523	-7.08538	2.68846e-05	0.000451621	2.64198	ERK240min
Ier3	IER3		immediate early response 3	1.21985	8.8813	7.08311	2.69602e-05	0.000452342	2.63904	ERK240min
Aass	AASS	ENSMUST00000031707	aminoadipate-semialdehyde synthase	-1.91945	9.82488	-7.0808	2.70374e-05	0.000453038	2.63603	ERK240min
Pla2g4e	PLA2G4E	ENSMUST00000090071	phospholipase A2, group IVE	-1.98597	7.69501	-7.0774	2.71518e-05	0.000454528	2.63159	ERK240min
Sesn1	SESN1	ENSMUST00000041438	sestrin 1	-1.14242	10.0754	-7.06586	2.75433e-05	0.000459706	2.61655	ERK240min
A830049F12Rik			RIKEN cDNA A830049F12 gene	-1.25487	6.2583	-7.06536	2.75605e-05	0.000459707	2.6159	ERK240min
Asprv1	ASPRV1		aspartic peptidase, retroviral-like 1	1.65661	6.49646	7.06409	2.7604e-05	0.000459969	2.61424	ERK240min
Il17rc	IL17RC	ENSMUST00000113061	interleukin 17 receptor C	-1.88299	9.75914	-7.06286	2.76462e-05	0.000460441	2.61264	ERK240min
Pias2	PIAS2	ENSMUST00000114776	protein inhibitor of activated STAT 2	-1.06326	13.2146	-7.05981	2.7751e-05	0.000461953	2.60866	ERK240min
Cnrip1	CNRIP1		cannabinoid receptor interacting protein 1	1.92337	4.99838	7.05733	2.78367e-05	0.000462914	2.60542	ERK240min
Cd99l2	CD99L2	ENSMUST00000080035	CD99 antigen-like 2	-1.4993	8.1307	-7.05419	2.79452e-05	0.000464485	2.60133	ERK240min
Mkrn1	MKRN1	ENSMUST00000031985	makorin, ring finger protein, 1	1.38973	15.2861	7.04884	2.81318e-05	0.000467353	2.59434	ERK240min
Echdc3	ECHDC3		enoyl Coenzyme A hydratase domain containing 3	1.07396	5.41274	7.04591	2.82345e-05	0.000468823	2.59051	ERK240min
Nlgn2	NLGN2	ENSMUST00000108634	neuroligin 2	-1.67915	11.0638	-7.04348	2.83201e-05	0.000470009	2.58733	ERK240min
F3	F3	ENSMUST00000029771	coagulation factor III	1.02246	6.6296	7.04255	2.83528e-05	0.000470316	2.58612	ERK240min
AA986860	C1orf116	ENSMUST00000039323	expressed sequence AA986860	1.80303	8.2153	7.03866	2.84904e-05	0.000471582	2.58103	ERK240min
Ralb	RALB	ENSMUST00000004565	v-ral simian leukemia viral oncogene homolog B (ras related)	-1.63825	12.7078	-7.03811	2.85098e-05	0.000471582	2.58032	ERK240min
H2-Eb1	HLA-DRB5	ENSMUST00000074557	histocompatibility 2, class II antigen E beta	-1.18923	6.66922	-7.02828	2.8861e-05	0.000476518	2.56745	ERK240min
Plbd1	PLBD1	ENSMUST00000032336	phospholipase B domain containing 1	1.58276	10.4228	7.02542	2.89641e-05	0.00047782	2.56371	ERK240min
Crispld2	CRISPLD2	ENSMUST00000132583	cysteine-rich secretory protein LCCL domain containing 2	-1.76759	5.67576	-7.0213	2.91129e-05	0.000480037	2.55832	ERK240min
Wdr31	WDR31	ENSMUST00000030087	WD repeat domain 31	1.36683	10.1411	7.01794	2.92353e-05	0.000481335	2.55392	ERK240min
Gm949			predicted gene 949	-2.58588	8.2509	-7.01209	2.94495e-05	0.000483419	2.54625	ERK240min
Wdr62	WDR62	ENSMUST00000047189	WD repeat domain 62	-1.03263	12.827	-7.00341	2.977e-05	0.000487498	2.53487	ERK240min
2810459M11Rik	C2orf72		RIKEN cDNA 2810459M11 gene	1.38917	5.45015	7.00337	2.97716e-05	0.000487498	2.53481	ERK240min
Gm4368			predicted gene 4368	1.744	5.10378	7.0004	2.98824e-05	0.000488828	2.53091	ERK240min
Amot	AMOT	ENSMUST00000112835	angiomotin	1.08706	9.46664	6.99069	3.02471e-05	0.00049333	2.51817	ERK240min
Dclk3	DCLK3		doublecortin-like kinase 3	-1.08025	5.67803	-6.98733	3.03744e-05	0.000494918	2.51376	ERK240min
Gm8909		ENSMUST00000040467	predicted gene 8909	-1.2802	8.23207	-6.98692	3.03901e-05	0.000494922	2.51321	ERK240min
Sobp	SOBP		sine oculis-binding protein homolog (Drosophila)	-2.20255	4.96853	-6.98613	3.04203e-05	0.000494936	2.51217	ERK240min
Gimap9	GIMAP7	ENSMUST00000054050	GTPase, IMAP family member 9	-1.04923	7.13859	-6.98504	3.04618e-05	0.000495124	2.51073	ERK240min
Arl6ip1	ARL6IP1		ADP-ribosylation factor-like 6 interacting protein 1	-1.05324	12.3979	-6.98203	3.05767e-05	0.000496388	2.50678	ERK240min
Rgs3	RGS3	ENSMUST00000084521	regulator of G-protein signaling 3	2.10711	9.95591	6.98182	3.05846e-05	0.000496388	2.50651	ERK240min
Ripk2	RIPK2		receptor (TNFRSF)-interacting serine-threonine kinase 2	-1.39146	6.64006	-6.98118	3.06092e-05	0.000496489	2.50566	ERK240min
Gsta3	GSTA3	ENSMUST00000121676	glutathione S-transferase, alpha 3	-1.36946	8.59475	-6.98087	3.06208e-05	0.000496489	2.50526	ERK240min
Phka2	PHKA2	ENSMUST00000033652	phosphorylase kinase alpha 2	-1.01535	11.0044	-6.97952	3.06727e-05	0.000497087	2.50349	ERK240min
Gm9839		ENSMUST00000050429	predicted gene 9839	1.08253	6.22944	6.97031	3.10287e-05	0.000501874	2.49136	ERK240min
Flnc	FLNC	ENSMUST00000090472	filamin C, gamma	1.09908	9.35567	6.96939	3.10646e-05	0.000502208	2.49015	ERK240min
Scx	SCX		scleraxis	1.14965	5.54627	6.96159	3.13697e-05	0.000506274	2.47988	ERK240min
1810041L15Rik	KIAA1644		RIKEN cDNA 1810041L15 gene	1.31128	4.65776	6.96139	3.13773e-05	0.000506274	2.47962	ERK240min
Lgi2	LGI2		leucine-rich repeat LGI family, member 2	-1.50701	7.0932	-6.96051	3.14119e-05	0.000506361	2.47846	ERK240min
Igsf8	IGSF8	ENSMUST00000039506	immunoglobulin superfamily, member 8	-1.25929	12.1906	-6.96048	3.14133e-05	0.000506361	2.47842	ERK240min
Ttc9b	TTC9B		tetratricopeptide repeat domain 9B	-2.15706	6.58319	-6.95171	3.17607e-05	0.000511214	2.46686	ERK240min
Shisa7	SHISA7		shisa homolog 7 (Xenopus laevis)	-1.28991	6.96779	-6.94358	3.20865e-05	0.000515956	2.45614	ERK240min
Arvcf	ARVCF		armadillo repeat gene deleted in velo-cardio-facial syndrome	-2.12486	8.09969	-6.94306	3.21075e-05	0.000516044	2.45545	ERK240min
Coro6	CORO6		coronin 6	1.33898	4.19907	6.94156	3.21682e-05	0.000516518	2.45346	ERK240min
Stag1	STAG1	ENSMUST00000129269	stromal antigen 1	-1.08675	10.572	-6.93903	3.22707e-05	0.000517661	2.45012	ERK240min
Ctsf	CTSF	ENSMUST00000115980	cathepsin F	-1.21214	8.63173	-6.93786	3.23179e-05	0.000518167	2.44858	ERK240min
Myl9	MYL9	ENSMUST00000088552	myosin, light polypeptide 9, regulatory	-1.86238	7.95943	-6.93713	3.23477e-05	0.000518393	2.44762	ERK240min
4930420K17Rik			RIKEN cDNA 4930420K17 gene	-1.08728	7.48633	-6.93074	3.26087e-05	0.000522322	2.43917	ERK240min
Pde4d	PDE4D	ENSMUST00000122041	phosphodiesterase 4D, cAMP specific	-1.09205	7.52418	-6.92652	3.27821e-05	0.00052434	2.4336	ERK240min
Dpf1	DPF1	ENSMUST00000065181	D4, zinc and double PHD fingers family 1	-1.17069	10.9777	-6.92456	3.28633e-05	0.000525384	2.431	ERK240min
Trnp1	TRNP1	ENSMUST00000125541	TMF1-regulated nuclear protein 1	-1.66474	8.99453	-6.92238	3.29534e-05	0.000525912	2.42812	ERK240min
Chac2	CHAC2		ChaC, cation transport regulator homolog 2 (E. coli)	1.40269	8.5577	6.92072	3.30223e-05	0.000526116	2.42593	ERK240min
Fut10	FUT10	ENSMUST00000066173	fucosyltransferase 10	-1.89018	7.80295	-6.91894	3.30966e-05	0.000526824	2.42356	ERK240min
Samd3	SAMD3		sterile alpha motif domain containing 3	1.1073	2.37973	6.91825	3.31253e-05	0.000526907	2.42266	ERK240min
Tcp11	TCP11	ENSMUST00000042692	t-complex protein 11	-1.01795	9.7606	-6.91805	3.31337e-05	0.000526907	2.42239	ERK240min
Glis2	GLIS2	ENSMUST00000122896	GLIS family zinc finger 2	-1.01029	12.9142	-6.91602	3.32182e-05	0.000527997	2.41971	ERK240min
Dnajb3		ENSMUST00000115975	DnaJ (Hsp40) homolog, subfamily B, member 3	1.29801	7.0466	6.91525	3.32505e-05	0.000528256	2.41869	ERK240min
Arhgap27	ARHGAP27		Rho GTPase activating protein 27	1.12442	5.92438	6.90898	3.35143e-05	0.000531173	2.41039	ERK240min
9230105E10Rik		ENSMUST00000059037	RIKEN cDNA 9230105E10 gene	-1.48172	6.40388	-6.90606	3.36379e-05	0.000532622	2.40652	ERK240min
Klk1b22	KLK1		kallikrein 1-related peptidase b22	-2.90862	5.18621	-6.90311	3.37632e-05	0.000534338	2.40261	ERK240min
Pink1	PINK1	ENSMUST00000030536	PTEN induced putative kinase 1	-1.27891	10.5779	-6.90195	3.38127e-05	0.000534367	2.40107	ERK240min
Eif4a2	EIF4A2	ENSMUST00000115341	eukaryotic translation initiation factor 4A2	-1.0074	14.2669	-6.89682	3.40322e-05	0.000537078	2.39427	ERK240min
Phlpp1	PHLPP1	ENSMUST00000061047	PH domain and leucine rich repeat protein phosphatase 1	-1.55341	8.05777	-6.8968	3.4033e-05	0.000537078	2.39425	ERK240min
Tcf15	TCF15		transcription factor 15	1.89564	12.9664	6.89435	3.41384e-05	0.000538308	2.391	ERK240min
Trp73	TP73	ENSMUST00000105644	transformation related protein 73	-2.82073	5.97638	-6.89169	3.42535e-05	0.000539396	2.38746	ERK240min
Slc4a5	SLC4A5	ENSMUST00000039212	solute carrier family 4, sodium bicarbonate cotransporter, member 5	-1.23207	8.32211	-6.8915	3.42613e-05	0.000539396	2.38722	ERK240min
Dlg5	DLG5		discs, large homolog 5 (Drosophila)	-1.38283	12.0155	-6.88582	3.45079e-05	0.00054239	2.37968	ERK240min
Il25	IL25	ENSMUST00000037863	interleukin 25	2.02618	4.15051	6.88126	3.47076e-05	0.000544609	2.37362	ERK240min
Foxd2	FOXD2	ENSMUST00000068654	forkhead box D2	-2.31889	3.71154	-6.87177	3.51264e-05	0.000550658	2.36102	ERK240min
Olfr687		ENSMUST00000098155	olfactory receptor 687	1.1355	2.28294	6.87103	3.51595e-05	0.000550916	2.36003	ERK240min
Nt5e	NT5E	ENSMUST00000034992	5' nucleotidase, ecto	3.46022	4.74257	6.86894	3.52526e-05	0.000552113	2.35725	ERK240min
Fam13a	FAM13A		family with sequence similarity 13, member A	-1.82618	4.87912	-6.868	3.52943e-05	0.000552243	2.35601	ERK240min
Fgf3	FGF3	ENSMUST00000155320	fibroblast growth factor 3	-2.10954	4.07113	-6.86518	3.54206e-05	0.000553924	2.35225	ERK240min
Nrcam	NRCAM	ENSMUST00000110751	neuron-glia-CAM-related cell adhesion molecule	-1.23005	6.21256	-6.86485	3.54352e-05	0.000553924	2.35182	ERK240min
Ttyh2	TTYH2	ENSMUST00000045779	tweety homolog 2 (Drosophila)	-2.04909	10.2623	-6.85746	3.57685e-05	0.000558079	2.34198	ERK240min
Rab5b	RAB5B		RAB5B, member RAS oncogene family	-1.01412	11.7777	-6.8567	3.58028e-05	0.000558281	2.34097	ERK240min
Atp11a	ATP11A	ENSMUST00000091237	ATPase, class VI, type 11A	-1.2665	11.1013	-6.85643	3.58152e-05	0.000558281	2.34061	ERK240min
Abcc4	ABCC4	ENSMUST00000036554	ATP-binding cassette, sub-family C (CFTR/MRP), member 4	1.31016	13.0791	6.85536	3.58636e-05	0.000558773	2.33919	ERK240min
E2f2	E2F2	ENSMUST00000061721	E2F transcription factor 2	1.79165	11.2202	6.85442	3.59065e-05	0.000559089	2.33793	ERK240min
Pde3b	PDE3B		phosphodiesterase 3B, cGMP-inhibited	1.40278	8.42396	6.85418	3.59176e-05	0.000559089	2.33761	ERK240min
Ccdc68	CCDC68		coiled-coil domain containing 68	-2.30604	6.29662	-6.8534	3.59531e-05	0.000559378	2.33657	ERK240min
Amigo3	AMIGO3	ENSMUST00000085060	adhesion molecule with Ig like domain 3	-1.31002	5.55455	-6.85019	3.60994e-05	0.000561156	2.3323	ERK240min
Foxd3	FOXD3	ENSMUST00000087285	forkhead box D3	-1.60294	10.8236	-6.85015	3.61013e-05	0.000561156	2.33225	ERK240min
Slc38a9	SLC38A9		solute carrier family 38, member 9	1.15693	8.59168	6.84764	3.62163e-05	0.000562154	2.32891	ERK240min
Rnase12	RNASE12		ribonuclease, RNase A family, 12 (non-active)	-1.91614	5.3609	-6.84764	3.62165e-05	0.000562154	2.3289	ERK240min
Arhgap42	ARHGAP42	ENSMUST00000093893	Rho GTPase activating protein 42	-1.3564	4.26201	-6.84354	3.6405e-05	0.000564604	2.32344	ERK240min
Mgat4a	MGAT4A	ENSMUST00000042161	mannoside acetylglucosaminyltransferase 4, isoenzyme A	-1.06425	7.18943	-6.84347	3.64085e-05	0.000564604	2.32334	ERK240min
Vat1l	VAT1L	ENSMUST00000124143	vesicle amine transport protein 1 homolog-like (T. californica)	2.36153	7.1122	6.84269	3.64444e-05	0.000564896	2.32231	ERK240min
Skil	SKIL	ENSMUST00000118204	SKI-like	1.0693	8.65618	6.84154	3.64979e-05	0.000565461	2.32077	ERK240min
Cttnbp2nl	CTTNBP2NL	ENSMUST00000077548	CTTNBP2 N-terminal like	1.01225	10.2156	6.83862	3.66332e-05	0.000566798	2.31688	ERK240min
Jak3	JAK3	ENSMUST00000051995	Janus kinase 3	-1.38145	8.90867	-6.83818	3.66538e-05	0.000566815	2.31629	ERK240min
Wdr16		ENSMUST00000123900	WD repeat domain 16	-1.45742	7.64678	-6.82968	3.70512e-05	0.000572425	2.30495	ERK240min
Rab3a	RAB3A	ENSMUST00000110092	RAB3A, member RAS oncogene family	-1.33517	9.82333	-6.82924	3.70719e-05	0.000572477	2.30437	ERK240min
Atg16l2	ATG16L2		autophagy related 16 like 2 (S. cerevisiae)	-1.452	8.45343	-6.82762	3.71484e-05	0.000573392	2.3022	ERK240min
Trpm1	TRPM1	ENSMUST00000032737	transient receptor potential cation channel, subfamily M, member 1	-2.11541	5.42772	-6.82596	3.72269e-05	0.000574335	2.29998	ERK240min
A630081J09Rik			RIKEN cDNA A630081J09 gene	1.37728	7.42994	6.82383	3.73275e-05	0.00057562	2.29714	ERK240min
2210008F06Rik			RIKEN cDNA 2210008F06 gene	1.68175	5.01127	6.82197	3.74163e-05	0.000576451	2.29465	ERK240min
N4bp2l1	N4BP2L1		NEDD4 binding protein 2-like 1	2.64088	2.78703	6.82093	3.74654e-05	0.000576939	2.29327	ERK240min
Gngt2	GNGT2		guanine nucleotide binding protein (G protein), gamma transducing activity polypeptide 2	1.35272	12.2855	6.81905	3.75553e-05	0.000578055	2.29075	ERK240min
Capn12	CAPN12		calpain 12	1.84283	3.0037	6.81696	3.76553e-05	0.000579197	2.28796	ERK240min
1700063H04Rik		ENSMUST00000043553	RIKEN cDNA 1700063H04 gene	1.32084	7.98071	6.81677	3.76645e-05	0.000579197	2.2877	ERK240min
Cblc	CBLC	ENSMUST00000145755	Casitas B-lineage lymphoma c	1.00236	8.73194	6.81196	3.78953e-05	0.000581839	2.28128	ERK240min
Eepd1	EEPD1		endonuclease/exonuclease/phosphatase family domain containing 1	1.14659	5.83624	6.81071	3.79559e-05	0.000582325	2.2796	ERK240min
Arl6ip5	ARL6IP5		ADP-ribosylation factor-like 6 interacting protein 5	1.27397	11.1086	6.80744	3.81142e-05	0.000584483	2.27523	ERK240min
Timp2	TIMP2	ENSMUST00000017610	tissue inhibitor of metalloproteinase 2	-1.42278	7.50702	-6.80703	3.81341e-05	0.000584516	2.27468	ERK240min
Zfp758			zinc finger protein 758	-2.2556	6.31243	-6.80205	3.83764e-05	0.000587143	2.26802	ERK240min
Doc2g		ENSMUST00000147806	double C2, gamma	1.35697	6.73993	6.79891	3.85304e-05	0.000588411	2.26381	ERK240min
Rarres1	RARRES1	ENSMUST00000054825	retinoic acid receptor responder (tazarotene induced) 1	-3.40542	4.33128	-6.79807	3.85714e-05	0.000588765	2.26269	ERK240min
Dsc2	DSC2	ENSMUST00000075214	desmocollin 2	3.41424	3.94559	6.79018	3.89614e-05	0.000594232	2.25212	ERK240min
A730080H06Rik			RIKEN cDNA A730080H06 gene	-1.38879	7.46469	-6.7901	3.89655e-05	0.000594232	2.25201	ERK240min
BC018465		ENSMUST00000045959	cDNA sequence BC018465	-1.6094	5.01286	-6.78941	3.89997e-05	0.000594373	2.25109	ERK240min
Ifi35	IFI35	ENSMUST00000125958	interferon-induced protein 35	-1.40053	8.33174	-6.78819	3.90602e-05	0.000594855	2.24946	ERK240min
Axin2	AXIN2	ENSMUST00000106712	axin2	2.50328	4.50035	6.78461	3.92393e-05	0.000596539	2.24465	ERK240min
Prss23	PRSS23	ENSMUST00000041761	protease, serine, 23	1.6325	4.9793	6.77613	3.96662e-05	0.000601867	2.23328	ERK240min
Atl1	ATL1	ENSMUST00000021466	atlastin GTPase 1	-1.45319	5.42124	-6.77151	3.99008e-05	0.000604873	2.22708	ERK240min
Wdr76	WDR76	ENSMUST00000028676	WD repeat domain 76	-2.05991	7.67317	-6.76756	4.01026e-05	0.00060663	2.22178	ERK240min
4933400A11Rik	CAPZA1		capping protein (actin filament) muscle Z-line, alpha 1 pseudogene	3.05882	3.20688	6.76738	4.01121e-05	0.00060663	2.22153	ERK240min
Ccdc137	CCDC137		coiled-coil domain containing 137	1.20413	9.55204	6.76709	4.01267e-05	0.00060663	2.22115	ERK240min
Myo9a	MYO9A	ENSMUST00000136740	myosin IXa	-1.06699	5.82973	-6.76462	4.02535e-05	0.000608269	2.21783	ERK240min
S100a13	S100A13	ENSMUST00000048138	S100 calcium binding protein A13	-1.81886	11.8193	-6.76143	4.0418e-05	0.000610477	2.21355	ERK240min
Olfr979	OR10G9		olfactory receptor 979	1.79543	2.81446	6.75971	4.05072e-05	0.000611544	2.21123	ERK240min
Ngef	NGEF	ENSMUST00000027477	neuronal guanine nucleotide exchange factor	1.17828	6.08747	6.75905	4.05413e-05	0.00061178	2.21035	ERK240min
1700001P01Rik	C17orf98		RIKEN cDNA 1700001P01 gene	-2.78363	8.28513	-6.75094	4.09642e-05	0.000617317	2.19944	ERK240min
Irak3	IRAK3	ENSMUST00000020448	interleukin-1 receptor-associated kinase 3	-1.33603	10.734	-6.75026	4.1e-05	0.000617575	2.19852	ERK240min
Pax2	PAX2	ENSMUST00000079074	paired box gene 2	-1.67947	4.22084	-6.74656	4.11946e-05	0.000620225	2.19354	ERK240min
Bcl6b	BCL6B		B-cell CLL/lymphoma 6, member B	1.53325	8.52123	6.74108	4.14849e-05	0.000624028	2.18616	ERK240min
Flrt2	FLRT2		fibronectin leucine rich transmembrane protein 2	-1.92577	3.05193	-6.7371	4.16971e-05	0.00062665	2.1808	ERK240min
Robo3	ROBO3		roundabout homolog 3 (Drosophila)	3.50673	3.85899	6.73325	4.19034e-05	0.000628893	2.17562	ERK240min
Gsta4		ENSMUST00000034903	glutathione S-transferase, alpha 4	-1.11237	13.3	-6.73203	4.19689e-05	0.000629306	2.17397	ERK240min
Cdc42ep5	CDC42EP5	ENSMUST00000076831	CDC42 effector protein (Rho GTPase binding) 5	-1.64539	10.2881	-6.72994	4.20816e-05	0.00063071	2.17116	ERK240min
Pcyt1b	PCYT1B	ENSMUST00000045898	phosphate cytidylyltransferase 1, choline, beta isoform	-1.06173	9.45635	-6.72034	4.26027e-05	0.000637654	2.15822	ERK240min
Usf2	USF2		upstream transcription factor 2	-1.30619	10.7762	-6.71525	4.28821e-05	0.000640677	2.15135	ERK240min
AY358078			cDNA sequence AY358078	1.93783	5.40594	6.71452	4.29227e-05	0.000640994	2.15036	ERK240min
1700034H14Rik			RIKEN cDNA 1700034H14 gene	1.65012	9.44391	6.71366	4.29701e-05	0.000641264	2.1492	ERK240min
Tmprss12	TMPRSS12		transmembrane (C-terminal) protease, serine 12	1.96129	6.13359	6.71349	4.29796e-05	0.000641264	2.14896	ERK240min
Fbxo10	FBXO10		F-box protein 10	-1.6897	8.67106	-6.71191	4.3067e-05	0.000641973	2.14683	ERK240min
Nkx1-1			NK1 transcription factor related, locus 1 (Drosophila)	1.87631	7.28353	6.71178	4.3074e-05	0.000641973	2.14666	ERK240min
Nenf	NENF	ENSMUST00000046770	neuron derived neurotrophic factor	1.09875	11.4022	6.71157	4.30853e-05	0.000641973	2.14638	ERK240min
Tpp1	TPP1	ENSMUST00000033184	tripeptidyl peptidase I	-1.30523	9.50962	-6.707	4.33394e-05	0.000644019	2.1402	ERK240min
Cthrc1	CTHRC1	ENSMUST00000067072	collagen triple helix repeat containing 1	2.57744	4.86899	6.70539	4.34291e-05	0.000645063	2.13803	ERK240min
Rcor3	RCOR3		REST corepressor 3	-1.24979	8.54159	-6.70073	4.369e-05	0.000648065	2.13173	ERK240min
Sun1	SUN1	ENSMUST00000110884	Sad1 and UNC84 domain containing 1	-1.07873	9.78765	-6.70016	4.37221e-05	0.00064825	2.13096	ERK240min
Map3k5	MAP3K5	ENSMUST00000095806	mitogen-activated protein kinase kinase kinase 5	1.68242	5.81001	6.69968	4.37491e-05	0.00064836	2.13031	ERK240min
Wdfy2	WDFY2	ENSMUST00000014691	WD repeat and FYVE domain containing 2	1.01145	6.36829	6.69706	4.38971e-05	0.000649681	2.12676	ERK240min
Jmjd7	JMJD7	ENSMUST00000044675	jumonji domain containing 7	-1.0575	10.9341	-6.69657	4.39244e-05	0.000649795	2.12611	ERK240min
Gap43	GAP43	ENSMUST00000125187	growth associated protein 43	-1.34369	10.7869	-6.68955	4.43234e-05	0.000653943	2.11661	ERK240min
Iffo2	IFFO2		intermediate filament family orphan 2	1.63372	8.64807	6.6889	4.43606e-05	0.000654201	2.11572	ERK240min
Kncn	KNCN		kinocilin	-1.20403	2.28198	-6.68787	4.44192e-05	0.000654773	2.11434	ERK240min
Trpm4	TRPM4	ENSMUST00000042194	transient receptor potential cation channel, subfamily M, member 4	-1.05922	8.17609	-6.68748	4.44415e-05	0.00065481	2.11381	ERK240min
Plekho1	PLEKHO1	ENSMUST00000015889	pleckstrin homology domain containing, family O member 1	-1.37076	8.30807	-6.68538	4.45623e-05	0.000656298	2.11096	ERK240min
Frmd4a	FRMD4A		FERM domain containing 4A	-1.9025	9.8782	-6.6834	4.46758e-05	0.000657677	2.10828	ERK240min
S1pr3	S1PR3		sphingosine-1-phosphate receptor 3	1.13435	7.31086	6.67776	4.50017e-05	0.000662179	2.10064	ERK240min
Nlrp5	NLRP5	ENSMUST00000015866	NLR family, pyrin domain containing 5	-1.04158	7.324	-6.67655	4.50722e-05	0.000662923	2.099	ERK240min
Nr2f1	NR2F1	ENSMUST00000091458	nuclear receptor subfamily 2, group F, member 1	-1.59009	5.22115	-6.67583	4.51141e-05	0.000663243	2.09802	ERK240min
Osbpl1a	OSBPL1A	ENSMUST00000121888	oxysterol binding protein-like 1A	-1.01885	11.4081	-6.67366	4.52402e-05	0.000664598	2.09509	ERK240min
Tmem38a	TMEM38A	ENSMUST00000034244	transmembrane protein 38A	-1.15557	9.66163	-6.67173	4.53532e-05	0.000664986	2.09247	ERK240min
Cda	CDA	ENSMUST00000030535	cytidine deaminase	2.38865	4.0615	6.66985	4.54635e-05	0.000665853	2.08991	ERK240min
Ehd4	EHD4	ENSMUST00000028755	EH-domain containing 4	1.03805	12.4477	6.66969	4.54727e-05	0.000665853	2.0897	ERK240min
Mfge8	MFGE8		milk fat globule-EGF factor 8 protein	-1.54984	14.7678	-6.665	4.57488e-05	0.000669557	2.08334	ERK240min
Fhdc1	FHDC1		FH2 domain containing 1	-1.67309	5.68971	-6.66471	4.57661e-05	0.000669557	2.08294	ERK240min
Gna13	GNA13	ENSMUST00000020930	guanine nucleotide binding protein, alpha 13	-1.16718	11.7749	-6.66226	4.5911e-05	0.000671084	2.07962	ERK240min
Rundc3a	RUNDC3A	ENSMUST00000107102	RUN domain containing 3A	1.49255	8.03913	6.65889	4.61112e-05	0.000673415	2.07504	ERK240min
Otop1	OTOP1		otopetrin 1	-1.82203	5.9562	-6.65703	4.62222e-05	0.000674739	2.07252	ERK240min
Nav1	NAV1		neuron navigator 1	-1.12916	9.47595	-6.65594	4.62869e-05	0.000674896	2.07105	ERK240min
Ndrg2	NDRG2	ENSMUST00000004673	N-myc downstream regulated gene 2	-1.81569	11.4818	-6.65535	4.63226e-05	0.000675013	2.07024	ERK240min
Pigyl	PIGY		phosphatidylinositol glycan anchor biosynthesis, class Y-like	-1.36896	12.3263	-6.65467	4.63629e-05	0.000675303	2.06932	ERK240min
4930447C04Rik	C14orf39	ENSMUST00000044000	RIKEN cDNA 4930447C04 gene	1.75635	8.4175	6.64619	4.68744e-05	0.000681253	2.05779	ERK240min
Trpa1	TRPA1		transient receptor potential cation channel, subfamily A, member 1	-2.35978	6.88673	-6.6448	4.69587e-05	0.000681699	2.0559	ERK240min
Ppp1r9b	PPP1R9B	ENSMUST00000038696	protein phosphatase 1, regulatory subunit 9B	1.03348	11.0983	6.64442	4.69816e-05	0.000681699	2.05539	ERK240min
Tubb6	TUBB6	ENSMUST00000001513	tubulin, beta 6	1.17102	13.5803	6.64401	4.70063e-05	0.000681699	2.05484	ERK240min
Bhmt2	BHMT2	ENSMUST00000015941	betaine-homocysteine methyltransferase 2	-1.71242	6.18003	-6.64398	4.7008e-05	0.000681699	2.0548	ERK240min
Ddx26b	DDX26B	ENSMUST00000142624	DEAD/H (Asp-Glu-Ala-Asp/His) box polypeptide 26B	-1.28602	9.37713	-6.64142	4.71641e-05	0.000683363	2.05132	ERK240min
4930443G12Rik			RIKEN cDNA 4930443G12 gene	1.32928	2.46162	6.63966	4.72716e-05	0.00068462	2.04892	ERK240min
Ccnyl1	CCNYL1	ENSMUST00000094898	cyclin Y-like 1	-1.0447	6.52327	-6.63742	4.74089e-05	0.000685409	2.04588	ERK240min
Gm8556		ENSMUST00000089904	predicted gene 8556	-1.08442	14.4042	-6.63622	4.74825e-05	0.000685703	2.04424	ERK240min
Prss44			protease, serine, 44	4.18467	4.32034	6.63574	4.75121e-05	0.000685703	2.04359	ERK240min
Cd81	CD81	ENSMUST00000037941	CD81 antigen	-1.09948	15.0145	-6.63069	4.78238e-05	0.000689249	2.03672	ERK240min
Epha4	EPHA4	ENSMUST00000027451	Eph receptor A4	-1.37595	8.87541	-6.62772	4.8008e-05	0.000691353	2.03268	ERK240min
Ajap1	AJAP1		adherens junction associated protein 1	3.50897	4.94133	6.62604	4.81131e-05	0.000692565	2.03038	ERK240min
Lmtk3	LMTK3	ENSMUST00000120005	lemur tyrosine kinase 3	-1.29019	9.94002	-6.62351	4.82708e-05	0.000694533	2.02694	ERK240min
Sh3bp4	SH3BP4		SH3-domain binding protein 4	-1.14485	7.25665	-6.62315	4.82937e-05	0.00069456	2.02644	ERK240min
Clnk	CLNK		cytokine-dependent hematopoietic cell linker	2.1187	5.73166	6.62044	4.84631e-05	0.000696193	2.02276	ERK240min
Cyld	CYLD		cylindromatosis (turban tumor syndrome)	-1.17662	6.87569	-6.61821	4.86034e-05	0.000697801	2.01972	ERK240min
Prr15l	PRR15L		proline rich 15-like	-1.78024	6.16012	-6.61657	4.87071e-05	0.000698987	2.01748	ERK240min
Prom2	PROM2		prominin 2	2.15485	5.16021	6.60711	4.93089e-05	0.000706092	2.00457	ERK240min
Cyp3a13	CYP3A7	ENSMUST00000031741	cytochrome P450, family 3, subfamily a, polypeptide 13	-2.69122	4.26995	-6.60653	4.9346e-05	0.000706224	2.00378	ERK240min
Aebp1	AEBP1	ENSMUST00000020766	AE binding protein 1	1.26682	9.62996	6.60509	4.94383e-05	0.000706417	2.00182	ERK240min
Fbxo32	FBXO32	ENSMUST00000022986	F-box protein 32	1.07237	5.78541	6.59568	5.00462e-05	0.000713563	1.98897	ERK240min
Adm2	ADM2	ENSMUST00000066991	adrenomedullin 2	1.78886	7.75624	6.59428	5.01372e-05	0.000714552	1.98707	ERK240min
Hmgb3	HMGB3	ENSMUST00000088874	high mobility group box 3	-1.26259	11.7341	-6.59331	5.02009e-05	0.000715152	1.98573	ERK240min
1110002B05Rik		ENSMUST00000056228	RIKEN cDNA 1110002B05 gene	-1.04099	10.1672	-6.59254	5.02508e-05	0.000715555	1.98469	ERK240min
Mdfic	MDFIC	ENSMUST00000120512	MyoD family inhibitor domain containing	-1.34963	8.09041	-6.59203	5.02842e-05	0.000715723	1.98399	ERK240min
4921524J17Rik	C16orf87		RIKEN cDNA 4921524J17 gene	-1.30161	9.18862	-6.59076	5.03675e-05	0.000715985	1.98225	ERK240min
Gm14326			predicted gene 14326	-1.01818	9.78159	-6.58996	5.04195e-05	0.000716415	1.98116	ERK240min
Sema3e	SEMA3E	ENSMUST00000073957	sema domain, immunoglobulin domain (Ig), short basic domain, secreted, (semaphorin) 3E	1.15379	6.72224	6.58868	5.05036e-05	0.000717303	1.97941	ERK240min
Lst1	LST1	ENSMUST00000097336	leukocyte specific transcript 1	-1.5622	8.79241	-6.58724	5.05981e-05	0.000718336	1.97745	ERK240min
Vegfb	VEGFB	ENSMUST00000025914	vascular endothelial growth factor B	-1.17208	11.2753	-6.58436	5.07885e-05	0.000720731	1.9735	ERK240min
Phf7	PHF7	ENSMUST00000022459	PHD finger protein 7	1.09344	8.88959	6.58078	5.10253e-05	0.00072378	1.96861	ERK240min
Odz3		ENSMUST00000110348	odd Oz/ten-m homolog 3 (Drosophila)	-1.82198	4.36118	-6.57351	5.15106e-05	0.000729396	1.95866	ERK240min
Myo10	MYO10	ENSMUST00000073021	myosin X	-1.61308	9.87985	-6.5685	5.18483e-05	0.000732942	1.95179	ERK240min
Rhbdf1	RHBDF1	ENSMUST00000102828	rhomboid family 1 (Drosophila)	1.73803	10.9245	6.566	5.20173e-05	0.000735017	1.94837	ERK240min
Mreg	MREG		melanoregulin	-1.31468	12.0003	-6.56538	5.20596e-05	0.0007353	1.94752	ERK240min
Lrrk1	LRRK1	ENSMUST00000137181	leucine-rich repeat kinase 1	1.74842	6.96147	6.56442	5.21244e-05	0.000735901	1.94621	ERK240min
Kcnq2	KCNQ2	ENSMUST00000140789	potassium voltage-gated channel, subfamily Q, member 2	-1.44252	7.25112	-6.55756	5.25926e-05	0.000741529	1.93681	ERK240min
2010204K13Rik		ENSMUST00000128571	RIKEN cDNA 2010204K13 gene	1.21991	11.2394	6.55727	5.26127e-05	0.000741529	1.93641	ERK240min
Tmem91	TMEM91	ENSMUST00000079439	transmembrane protein 91	1.24002	6.60954	6.55659	5.26593e-05	0.000741641	1.93548	ERK240min
Gamt	GAMT	ENSMUST00000105363	guanidinoacetate methyltransferase	-1.53045	8.46382	-6.55621	5.26857e-05	0.000741641	1.93495	ERK240min
Cdc14b	CDC14B		CDC14 cell division cycle 14 homolog B (S. cerevisiae)	1.00042	10.2781	6.55577	5.2716e-05	0.000741722	1.93435	ERK240min
Acaa1b	ACAA1		acetyl-Coenzyme A acyltransferase 1B	-1.11819	9.07557	-6.55523	5.27529e-05	0.000741926	1.93361	ERK240min
Ephb4	EPHB4	ENSMUST00000061244	Eph receptor B4	-1.47771	10.7765	-6.5506	5.30727e-05	0.00074545	1.92726	ERK240min
Tuba8	TUBA8	ENSMUST00000032233	tubulin, alpha 8	2.19402	3.6365	6.5503	5.30936e-05	0.00074545	1.92685	ERK240min
Pou4f3	POU4F3	ENSMUST00000025374	POU domain, class 4, transcription factor 3	1.2187	4.40315	6.54924	5.31667e-05	0.00074616	1.9254	ERK240min
Tgfbr1	TGFBR1	ENSMUST00000007757	transforming growth factor, beta receptor I	-1.00857	9.92137	-6.54426	5.35141e-05	0.000750082	1.91855	ERK240min
Serpinb1b	SERPINB1	ENSMUST00000016951	serine (or cysteine) peptidase inhibitor, clade B, member 1b	-1.98283	4.99674	-6.54094	5.37462e-05	0.00075219	1.91401	ERK240min
Bmp4	BMP4	ENSMUST00000100676	bone morphogenetic protein 4	2.43389	13.4423	6.53999	5.38131e-05	0.000752678	1.9127	ERK240min
Lysmd2	LYSMD2		LysM, putative peptidoglycan-binding, domain containing 2	1.36461	10.195	6.5391	5.3876e-05	0.00075324	1.91147	ERK240min
Acsl5	ACSL5	ENSMUST00000043150	acyl-CoA synthetase long-chain family member 5	1.18788	9.42861	6.53772	5.3973e-05	0.000754277	1.90958	ERK240min
Sycp1	SYCP1	ENSMUST00000029448	synaptonemal complex protein 1	1.12465	6.28096	6.53583	5.41068e-05	0.000755828	1.90698	ERK240min
Galr2	GALR2	ENSMUST00000154277	galanin receptor 2	-1.81795	6.26382	-6.53516	5.4154e-05	0.00075585	1.90606	ERK240min
Cnr1	CNR1	ENSMUST00000084736	cannabinoid receptor 1 (brain)	3.42443	3.89	6.52449	5.49155e-05	0.000765832	1.89139	ERK240min
Car6	CA6	ENSMUST00000030817	carbonic anhydrase 6	2.56306	4.76494	6.51784	5.53957e-05	0.000770955	1.88223	ERK240min
Sh3rf1	SH3RF1		SH3 domain containing ring finger 1	-1.3085	7.37038	-6.51779	5.53993e-05	0.000770955	1.88217	ERK240min
Igf2as		ENSMUST00000141681	insulin-like growth factor 2, antisense	1.33282	5.65181	6.51743	5.54255e-05	0.000770994	1.88167	ERK240min
Slc39a14	SLC39A14	ENSMUST00000082144	solute carrier family 39 (zinc transporter), member 14	1.981	10.7864	6.51338	5.572e-05	0.000774114	1.8761	ERK240min
Ifitm3	IFITM3	ENSMUST00000026565	interferon induced transmembrane protein 3	-1.05453	13.2853	-6.50619	5.62472e-05	0.00078028	1.8662	ERK240min
Nktr	NKTR		natural killer tumor recognition sequence	-1.10561	10.9542	-6.50552	5.62967e-05	0.000780488	1.86528	ERK240min
Klf6	KLF6	ENSMUST00000000080	Kruppel-like factor 6	1.01165	12.7649	6.50308	5.64771e-05	0.000782334	1.86191	ERK240min
Dcbld1	DCBLD1		discoidin, CUB and LCCL domain containing 1	-1.03456	9.94182	-6.50012	5.66974e-05	0.000785057	1.85782	ERK240min
Abca7	ABCA7	ENSMUST00000043866	ATP-binding cassette, sub-family A (ABC1), member 7	-1.34839	11.4161	-6.49815	5.68438e-05	0.000786755	1.85511	ERK240min
Il6ra	IL6R	ENSMUST00000029559	interleukin 6 receptor, alpha	1.63007	9.3349	6.49437	5.71269e-05	0.000789982	1.84989	ERK240min
Trak1	TRAK1	ENSMUST00000045903	trafficking protein, kinesin binding 1	-1.5044	10.7261	-6.49408	5.71485e-05	0.000789982	1.84949	ERK240min
Spnb4			spectrin beta 4	1.263	11.73	6.49238	5.72759e-05	0.000791412	1.84715	ERK240min
Camk2b	CAMK2B	ENSMUST00000090443	calcium/calmodulin-dependent protein kinase II, beta	-1.47163	11.0592	-6.48182	5.80762e-05	0.000800439	1.83257	ERK240min
Rcan2	RCAN2	ENSMUST00000044895	regulator of calcineurin 2	-1.31329	7.00964	-6.48153	5.80985e-05	0.000800439	1.83216	ERK240min
Dock1	DOCK1	ENSMUST00000084488	dedicator of cytokinesis 1	-1.31411	11.2574	-6.47139	5.8878e-05	0.000809999	1.81816	ERK240min
Gnai1	GNAI1	ENSMUST00000074694	guanine nucleotide binding protein (G protein), alpha inhibiting 1	-1.22547	9.60754	-6.46965	5.90127e-05	0.000809999	1.81575	ERK240min
Commd3	COMMD3		COMM domain containing 3	-1.14734	10.553	-6.46904	5.90605e-05	0.000810319	1.8149	ERK240min
Acpl2		ENSMUST00000120101	acid phosphatase-like 2	-1.49339	7.16434	-6.46665	5.92461e-05	0.000812198	1.81161	ERK240min
Pcsk6	PCSK6	ENSMUST00000055576	proprotein convertase subtilisin/kexin type 6	-1.12486	11.7765	-6.46665	5.92465e-05	0.000812198	1.8116	ERK240min
C230052I12Rik	C19orf40		RIKEN cDNA C230052I12 gene	1.17691	8.99108	6.46463	5.94038e-05	0.000814017	1.80881	ERK240min
F2rl1	F2RL1	ENSMUST00000022185	coagulation factor II (thrombin) receptor-like 1	1.40492	7.22151	6.46404	5.945e-05	0.000814217	1.80799	ERK240min
Mef2b	MEF2B	ENSMUST00000072500	myocyte enhancer factor 2B	1.07083	9.38376	6.46279	5.95479e-05	0.000814641	1.80627	ERK240min
Tsks	TSKS	ENSMUST00000120929	testis-specific serine kinase substrate	-1.59834	8.32417	-6.46191	5.96173e-05	0.000815214	1.80504	ERK240min
Npw	NPW	ENSMUST00000095544	neuropeptide W	1.61606	8.74777	6.46163	5.9639e-05	0.000815214	1.80466	ERK240min
Zfp60	ZNF780A		zinc finger protein 60	-1.38357	6.62202	-6.46071	5.97118e-05	0.000815536	1.80338	ERK240min
Tgfbi	TGFBI		transforming growth factor, beta induced	-1.84418	10.9611	-6.45684	6.00171e-05	0.000818354	1.79802	ERK240min
Ptplad2	PTPLAD2	ENSMUST00000068220	protein tyrosine phosphatase-like A domain containing 2	-1.00223	5.39077	-6.4564	6.00513e-05	0.000818483	1.79742	ERK240min
Pvrl1	PVRL1	ENSMUST00000034510	poliovirus receptor-related 1	1.29525	11.3387	6.45456	6.01969e-05	0.000819793	1.79487	ERK240min
Pdlim1	PDLIM1	ENSMUST00000068439	PDZ and LIM domain 1 (elfin)	-1.0376	14.1651	-6.45052	6.05187e-05	0.000823158	1.78927	ERK240min
Gcm1	GCM1	ENSMUST00000024104	glial cells missing homolog 1 (Drosophila)	3.34163	2.89916	6.44767	6.07469e-05	0.000825584	1.78531	ERK240min
Acp5	ACP5	ENSMUST00000115315	acid phosphatase 5, tartrate resistant	-1.27998	11.4216	-6.44255	6.11583e-05	0.00082972	1.77822	ERK240min
Tspyl5	TSPYL5		testis-specific protein, Y-encoded-like 5	1.97185	3.93277	6.44232	6.11766e-05	0.00082972	1.7779	ERK240min
Dzip1l	DZIP1L	ENSMUST00000112885	DAZ interacting protein 1-like	-1.84087	3.90922	-6.43996	6.13675e-05	0.000831436	1.77463	ERK240min
Ceacam10	CEACAM1		carcinoembryonic antigen-related cell adhesion molecule 10	-1.94618	4.76271	-6.43983	6.13785e-05	0.000831436	1.77444	ERK240min
Lpp	LPP	ENSMUST00000078988	LIM domain containing preferred translocation partner in lipoma	1.73864	6.08489	6.41776	6.31945e-05	0.000851383	1.7438	ERK240min
S100pbp	S100PBP	ENSMUST00000117350	S100P binding protein	-1.8479	4.31391	-6.41756	6.32112e-05	0.000851383	1.74352	ERK240min
C1qtnf4	C1QTNF4		C1q and tumor necrosis factor related protein 4	1.07692	7.38052	6.4171	6.32491e-05	0.000851547	1.74289	ERK240min
Rnaseh2b	RNASEH2B		ribonuclease H2, subunit B	-1.27191	13.0166	-6.41263	6.36245e-05	0.000855557	1.73667	ERK240min
Ptprz1	PTPRZ1	ENSMUST00000115377	protein tyrosine phosphatase, receptor type Z, polypeptide 1	1.25817	6.82113	6.40357	6.43919e-05	0.000864471	1.72407	ERK240min
Ggta1			glycoprotein galactosyltransferase alpha 1, 3	-1.66271	5.03855	-6.40276	6.44617e-05	0.000865057	1.72293	ERK240min
Mafk	MAFK	ENSMUST00000110836	v-maf musculoaponeurotic fibrosarcoma oncogene family, protein K (avian)	1.2072	8.23624	6.40066	6.46412e-05	0.000866764	1.72001	ERK240min
Cecr6	CECR6		cat eye syndrome chromosome region, candidate 6 homolog (human)	1.74941	2.48769	6.39817	6.48548e-05	0.000869275	1.71654	ERK240min
Col11a1	COL11A1	ENSMUST00000029585	collagen, type XI, alpha 1	-1.88525	3.71692	-6.39552	6.50823e-05	0.000871618	1.71286	ERK240min
Ddit3	DDIT3	ENSMUST00000139091	DNA-damage inducible transcript 3	2.36563	9.96754	6.39505	6.51229e-05	0.000871809	1.7122	ERK240min
Abca8b	ABCA8		ATP-binding cassette, sub-family A (ABC1), member 8b	-1.81049	5.89293	-6.38818	6.57192e-05	0.000878418	1.70262	ERK240min
Calhm2	CALHM2		calcium homeostasis modulator 2	-1.94342	6.93395	-6.3866	6.58574e-05	0.000879767	1.70041	ERK240min
E130202H07Rik			RIKEN cDNA E130202H07 gene	1.75653	4.80686	6.38607	6.59034e-05	0.000879767	1.69968	ERK240min
Akr1c18	AKR1C3	ENSMUST00000110704	aldo-keto reductase family 1, member C18	-1.09549	5.9554	-6.38404	6.60808e-05	0.000881779	1.69686	ERK240min
4930524J08Rik		ENSMUST00000046721	RIKEN cDNA 4930524J08 gene	-1.07059	7.67354	-6.38333	6.61431e-05	0.000882254	1.69587	ERK240min
Mgll	MGLL	ENSMUST00000113585	monoglyceride lipase	-1.72626	4.03321	-6.38047	6.63951e-05	0.000885121	1.69187	ERK240min
Jmjd1c	JMJD1C	ENSMUST00000095573	jumonji domain containing 1C	1.4658	12.5931	6.38028	6.64115e-05	0.000885121	1.69161	ERK240min
Myl7	MYL7	ENSMUST00000102921	myosin, light polypeptide 7, regulatory	-2.0727	6.48	-6.37829	6.65878e-05	0.000886314	1.68882	ERK240min
Wdr44	WDR44	ENSMUST00000035766	WD repeat domain 44	-1.59036	6.46236	-6.37392	6.69751e-05	0.000890657	1.68273	ERK240min
Ipmk	IPMK	ENSMUST00000147277	inositol polyphosphate multikinase	-1.00684	7.24133	-6.3714	6.72e-05	0.000892395	1.6792	ERK240min
Ggt1	GGT1	ENSMUST00000006508	gamma-glutamyltransferase 1	1.16341	6.24257	6.36884	6.7429e-05	0.000894718	1.67563	ERK240min
Rell2	RELL2		RELT-like 2	1.2782	9.40142	6.36459	6.7811e-05	0.00089791	1.66969	ERK240min
Tfdp2	TFDP2		transcription factor Dp 2	-1.14942	10.2936	-6.36435	6.78323e-05	0.00089791	1.66936	ERK240min
Trmt2b	TRMT2B	ENSMUST00000113252	TRM2 tRNA methyltransferase 2 homolog B (S. cerevisiae)	-1.38138	9.07301	-6.35677	6.85199e-05	0.000905201	1.65876	ERK240min
Nfkb1	NFKB1	ENSMUST00000106275	nuclear factor of kappa light polypeptide gene enhancer in B-cells 1, p105	1.54346	7.83005	6.35428	6.8747e-05	0.000907839	1.65528	ERK240min
Zfp677	ZNF28	ENSMUST00000056107	zinc finger protein 677	1.3472	6.77045	6.34814	6.93109e-05	0.000914395	1.6467	ERK240min
Camta1	CAMTA1	ENSMUST00000049790	calmodulin binding transcription activator 1	-1.11474	8.82055	-6.34798	6.93264e-05	0.000914395	1.64646	ERK240min
Zbtb24	ZBTB24	ENSMUST00000105508	zinc finger and BTB domain containing 24	-1.17164	9.69991	-6.34647	6.9466e-05	0.000915507	1.64435	ERK240min
Tenc1	TENC1	ENSMUST00000046144	tensin like C1 domain-containing phosphatase	1.11929	7.33184	6.3447	6.96293e-05	0.000916172	1.64188	ERK240min
Zbtb38	ZBTB38	ENSMUST00000126066	zinc finger and BTB domain containing 38	-1.28404	6.67529	-6.3447	6.96297e-05	0.000916172	1.64187	ERK240min
Caprin1	CAPRIN1		cell cycle associated protein 1	-1.03369	8.78924	-6.34443	6.96549e-05	0.000916172	1.64149	ERK240min
Chn1	CHN1		chimerin (chimaerin) 1	-1.17532	7.57284	-6.34338	6.97522e-05	0.000917087	1.64003	ERK240min
Sfxn3	SFXN3	ENSMUST00000062213	sideroflexin 3	-1.24399	9.89885	-6.34213	6.98689e-05	0.000918257	1.63827	ERK240min
Prr12	PRR12		proline rich 12	-1.26336	8.72202	-6.3379	7.02632e-05	0.000922341	1.63236	ERK240min
Gm7467		ENSMUST00000101096	predicted gene 7467	-1.38123	6.00062	-6.33307	7.07177e-05	0.000926836	1.62558	ERK240min
Cd300e	CD300E	ENSMUST00000062787	CD300e antigen	-1.51988	5.23599	-6.33265	7.07575e-05	0.00092699	1.62499	ERK240min
Cldn2	CLDN2	ENSMUST00000054889	claudin 2	2.12076	2.73478	6.33167	7.08492e-05	0.000927825	1.62363	ERK240min
Vldlr	VLDLR	ENSMUST00000047645	very low density lipoprotein receptor	1.57358	8.20163	6.33135	7.08794e-05	0.000927853	1.62318	ERK240min
Patz1	PATZ1	ENSMUST00000110045	POZ (BTB) and AT hook containing zinc finger 1	-1.02945	10.3109	-6.3275	7.12448e-05	0.000931099	1.61777	ERK240min
Crisp1	CRISP3	ENSMUST00000026498	cysteine-rich secretory protein 1	-1.76171	4.23055	-6.32644	7.13461e-05	0.000931099	1.61628	ERK240min
Wbp2nl	WBP2NL		WBP2 N-terminal like	-1.09469	7.47947	-6.32632	7.13575e-05	0.000931099	1.61611	ERK240min
1110054M08Rik			RIKEN cDNA 1110054M08 gene	1.6958	6.2734	6.32623	7.13662e-05	0.000931099	1.61599	ERK240min
Wdr82	WDR82	ENSMUST00000020490	WD repeat domain containing 82	-1.08376	12.4742	-6.32622	7.13669e-05	0.000931099	1.61598	ERK240min
Rusc1	RUSC1	ENSMUST00000090929	RUN and SH3 domain containing 1	-1.02436	10.733	-6.32607	7.13806e-05	0.000931099	1.61577	ERK240min
Atp6ap2	ATP6AP2	ENSMUST00000033313	ATPase, H+ transporting, lysosomal accessory protein 2	-1.07214	11.8098	-6.32403	7.15759e-05	0.000933278	1.6129	ERK240min
Sgsh	SGSH	ENSMUST00000005173	N-sulfoglucosamine sulfohydrolase (sulfamidase)	-1.26804	7.29308	-6.31925	7.20342e-05	0.000938515	1.60619	ERK240min
1700016D06Rik			RIKEN cDNA 1700016D06 gene	-3.96602	4.66447	-6.31886	7.20713e-05	0.000938629	1.60565	ERK240min
Myl2	MYL2	ENSMUST00000123913	myosin, light polypeptide 2, regulatory, cardiac, slow	-1.1884	7.13054	-6.31311	7.26268e-05	0.000944377	1.59758	ERK240min
Wdr81	WDR81	ENSMUST00000051512	WD repeat domain 81	-1.10648	11.3278	-6.31258	7.26783e-05	0.000944675	1.59684	ERK240min
Clvs2	CLVS2	ENSMUST00000019920	clavesin 2	1.60334	7.00529	6.3089	7.30375e-05	0.000947854	1.59166	ERK240min
Mtap2		ENSMUST00000024639	microtubule-associated protein 2	-1.3267	5.42999	-6.30788	7.31366e-05	0.000948769	1.59023	ERK240min
Herc3	HERC3		hect domain and RLD 3	-1.221	9.34285	-6.30752	7.31724e-05	0.000948861	1.58972	ERK240min
Magi3	MAGI3	ENSMUST00000098772	membrane associated guanylate kinase, WW and PDZ domain containing 3	-1.09854	6.64495	-6.30674	7.32478e-05	0.000949035	1.58863	ERK240min
Tcfap2a		ENSMUST00000021787	transcription factor AP-2, alpha	-1.50423	6.6992	-6.30588	7.33327e-05	0.00094908	1.58742	ERK240min
Fbxo28	FBXO28		F-box protein 28	1.10037	7.94595	6.30002	7.39097e-05	0.0009558	1.57918	ERK240min
Tsc22d4	TSC22D4		TSC22 domain family, member 4	1.16702	5.46486	6.29914	7.39967e-05	0.000956141	1.57794	ERK240min
Sipa1l1	SIPA1L1	ENSMUST00000047967	signal-induced proliferation-associated 1 like 1	-1.03589	11.5537	-6.29892	7.40183e-05	0.000956141	1.57764	ERK240min
Klhl13	KLHL13	ENSMUST00000115313	kelch-like 13 (Drosophila)	-1.12635	13.0526	-6.29888	7.40227e-05	0.000956141	1.57758	ERK240min
Ldhal6b	LDHAL6B		lactate dehydrogenase A-like 6B	-1.15381	6.26675	-6.29487	7.4421e-05	0.000959414	1.57194	ERK240min
Nqo2	NQO2	ENSMUST00000021843	NAD(P)H dehydrogenase, quinone 2	-1.21201	8.54454	-6.29366	7.4542e-05	0.000960599	1.57023	ERK240min
Pdgfb	PDGFB	ENSMUST00000000500	platelet derived growth factor, B polypeptide	-1.42799	8.89546	-6.28935	7.49729e-05	0.000964896	1.56417	ERK240min
Acsl1	ACSL1	ENSMUST00000034046	acyl-CoA synthetase long-chain family member 1	-1.04121	11.6984	-6.28906	7.50018e-05	0.000964896	1.56377	ERK240min
St6galnac2	ST6GALNAC2	ENSMUST00000135771	ST6 (alpha-N-acetyl-neuraminyl-2,3-beta-galactosyl-1,3)-N-acetylgalactosaminide alpha-2,6-sialyltransferase 2	1.3126	9.37079	6.28887	7.50212e-05	0.000964896	1.56349	ERK240min
Nhedc1		ENSMUST00000090209	Na+/H+ exchanger domain containing 1	1.20958	7.49524	6.2877	7.51393e-05	0.00096604	1.56184	ERK240min
Irak2	IRAK2	ENSMUST00000113024	interleukin-1 receptor-associated kinase 2	-2.634	5.36003	-6.28584	7.53265e-05	0.00096807	1.55923	ERK240min
Slc43a2	SLC43A2	ENSMUST00000108433	solute carrier family 43, member 2	1.32971	9.14795	6.28501	7.54101e-05	0.000968769	1.55806	ERK240min
Cbln1	CBLN1	ENSMUST00000034076	cerebellin 1 precursor protein	-2.0545	5.84447	-6.28135	7.57811e-05	0.000973058	1.5529	ERK240min
Dpp7	DPP7	ENSMUST00000028332	dipeptidylpeptidase 7	-1.00058	12.6222	-6.28026	7.58916e-05	0.000973442	1.55137	ERK240min
Tmc7	TMC7		transmembrane channel-like gene family 7	-1.52858	8.33613	-6.27544	7.63843e-05	0.000978623	1.54457	ERK240min
Zfp943		ENSMUST00000055349	zinc finger prtoein 943	-1.04959	8.74162	-6.27506	7.64228e-05	0.000978678	1.54404	ERK240min
Fcho2	FCHO2		FCH domain only 2	-1.10197	6.90593	-6.27482	7.64476e-05	0.000978678	1.5437	ERK240min
Elk1	ELK1	ENSMUST00000009550	ELK1, member of ETS oncogene family	-1.04831	6.87499	-6.27238	7.66979e-05	0.000981502	1.54026	ERK240min
Atp1a3	ATP1A3	ENSMUST00000080882	ATPase, Na+/K+ transporting, alpha 3 polypeptide	-1.28173	10.0779	-6.2716	7.67788e-05	0.000982158	1.53916	ERK240min
Myh3	MYH3	ENSMUST00000007301	myosin, heavy polypeptide 3, skeletal muscle, embryonic	1.67391	6.80859	6.26944	7.70016e-05	0.000984627	1.53611	ERK240min
Jag2	JAG2	ENSMUST00000075827	jagged 2	1.02509	8.10801	6.26652	7.73041e-05	0.000987731	1.53199	ERK240min
Cdx4	CDX4	ENSMUST00000033689	caudal type homeobox 4	2.05164	2.53681	6.25763	7.8232e-05	0.000998046	1.51945	ERK240min
4921507P07Rik	C7orf31		RIKEN cDNA 4921507P07 gene	2.27543	4.0472	6.25619	7.83836e-05	0.000999588	1.51742	ERK240min
Nkd2	NKD2		naked cuticle 2 homolog (Drosophila)	1.35326	5.86254	6.25591	7.84133e-05	0.000999588	1.51702	ERK240min
Keap1	KEAP1		kelch-like ECH-associated protein 1	-1.41997	10.8321	-6.25508	7.85007e-05	0.00100032	1.51585	ERK240min
Nudt8	NUDT8	ENSMUST00000025802	nudix (nucleoside diphosphate linked moiety X)-type motif 8	1.10045	9.58573	6.25389	7.86268e-05	0.00100154	1.51416	ERK240min
9930105H17Rik			RIKEN cDNA 9930105H17 gene	1.38215	8.79049	6.25337	7.86819e-05	0.00100185	1.51343	ERK240min
Rrad	RRAD	ENSMUST00000034351	Ras-related associated with diabetes	2.16083	5.71321	6.24834	7.92153e-05	0.00100826	1.50632	ERK240min
Prr5l	PRR5L		proline rich 5 like	1.50217	9.43624	6.24601	7.94638e-05	0.00101103	1.50303	ERK240min
Gm6812		ENSMUST00000074894	predicted gene 6812	-1.03944	8.13819	-6.237	8.0434e-05	0.0010218	1.49028	ERK240min
Spata9	SPATA9		spermatogenesis associated 9	1.58288	2.50267	6.2362	8.05202e-05	0.00102251	1.48915	ERK240min
Nab2	NAB2	ENSMUST00000105248	Ngfi-A binding protein 2	1.53212	11.9678	6.23402	8.07571e-05	0.00102465	1.48607	ERK240min
Islr2	ISLR2		immunoglobulin superfamily containing leucine-rich repeat 2	-2.64021	9.45985	-6.23398	8.07615e-05	0.00102465	1.48601	ERK240min
Jarid2	JARID2		jumonji, AT rich interactive domain 2	1.31204	13.4693	6.23223	8.09521e-05	0.00102602	1.48353	ERK240min
Fetub	FETUB	ENSMUST00000116625	fetuin beta	1.28993	10.0479	6.23166	8.1014e-05	0.00102642	1.48273	ERK240min
Smok4a		ENSMUST00000115649	sperm motility kinase 4A	1.86713	4.59	6.22936	8.12654e-05	0.00102842	1.47947	ERK240min
Amz1	AMZ1	ENSMUST00000060918	archaelysin family metallopeptidase 1	1.12615	8.69916	6.226	8.16348e-05	0.00103221	1.47471	ERK240min
Foxo6	FOXO6	ENSMUST00000102656	forkhead box O6	-2.36181	9.69527	-6.22301	8.19639e-05	0.00103529	1.47048	ERK240min
Wnt8a	WNT8A	ENSMUST00000012426	wingless-related MMTV integration site 8A	2.22261	3.98874	6.223	8.19648e-05	0.00103529	1.47047	ERK240min
Rbfox1	RBFOX1	ENSMUST00000096292	RNA binding protein, fox-1 homolog (C. elegans) 1	2.37438	3.44421	6.22165	8.21151e-05	0.0010364	1.46854	ERK240min
Jag1	JAG1		jagged 1	-1.13815	9.40188	-6.2205	8.22416e-05	0.00103688	1.46692	ERK240min
Prok2	PROK2	ENSMUST00000032152	prokineticin 2	2.68608	5.32281	6.22039	8.22539e-05	0.00103688	1.46677	ERK240min
Tmem141	TMEM141	ENSMUST00000150165	transmembrane protein 141	1.0597	10.8928	6.21948	8.2355e-05	0.00103688	1.46548	ERK240min
Trpv4	TRPV4	ENSMUST00000071968	transient receptor potential cation channel, subfamily V, member 4	-1.01949	5.12071	-6.21454	8.29057e-05	0.00104127	1.45847	ERK240min
Dkk1	DKK1	ENSMUST00000025803	dickkopf homolog 1 (Xenopus laevis)	-1.80385	4.12183	-6.2145	8.29105e-05	0.00104127	1.45841	ERK240min
Gm1673	C4orf48	ENSMUST00000142510	predicted gene 1673	1.08887	8.5018	6.20917	8.35095e-05	0.0010476	1.45085	ERK240min
Metrnl	METRNL		meteorin, glial cell differentiation regulator-like	3.10158	6.73626	6.20408	8.40847e-05	0.00105402	1.44363	ERK240min
Mrc1	MRC1		mannose receptor, C type 1	2.34462	6.58581	6.20165	8.43621e-05	0.0010567	1.44017	ERK240min
Slc30a3	SLC30A3	ENSMUST00000031037	solute carrier family 30 (zinc transporter), member 3	1.40289	5.90718	6.19739	8.48484e-05	0.00106075	1.43413	ERK240min
Rarg	RARG	ENSMUST00000063339	retinoic acid receptor, gamma	1.55256	14.8451	6.19692	8.4903e-05	0.00106075	1.43346	ERK240min
Eps8	EPS8		epidermal growth factor receptor pathway substrate 8	1.3788	7.43294	6.19669	8.49287e-05	0.00106075	1.43314	ERK240min
Oxct2a	OXCT2		3-oxoacid CoA transferase 2A	1.57027	4.97608	6.19658	8.49419e-05	0.00106075	1.43298	ERK240min
Katnal2	KATNAL2	ENSMUST00000154053	katanin p60 subunit A-like 2	1.6261	4.82966	6.19351	8.52952e-05	0.00106396	1.42861	ERK240min
Prdm16	PRDM16	ENSMUST00000141164	PR domain containing 16	-2.01566	4.38595	-6.1917	8.55039e-05	0.00106565	1.42605	ERK240min
Ptpn18	PTPN18		protein tyrosine phosphatase, non-receptor type 18	1.25416	8.99313	6.19143	8.55352e-05	0.00106565	1.42566	ERK240min
Ralyl	RALYL	ENSMUST00000108372	RALY RNA binding protein-like	-1.64357	2.77067	-6.19121	8.55601e-05	0.00106565	1.42535	ERK240min
Ppp3cc	PPP3CC	ENSMUST00000078434	protein phosphatase 3, catalytic subunit, gamma isoform	1.41518	6.1374	6.18922	8.57913e-05	0.00106813	1.42252	ERK240min
Urgcp	URGCP	ENSMUST00000120306	upregulator of cell proliferation	-2.27234	9.08543	-6.1812	8.67279e-05	0.00107817	1.41111	ERK240min
1700025K23Rik		ENSMUST00000135785	RIKEN cDNA 1700025K23 gene	1.05676	7.22827	6.1763	8.7305e-05	0.00108412	1.40414	ERK240min
Tns3	TNS3	ENSMUST00000020695	tensin 3	1.07748	12.9005	6.17474	8.74898e-05	0.0010856	1.40192	ERK240min
Abcd3	ABCD3	ENSMUST00000029770	ATP-binding cassette, sub-family D (ALD), member 3	-1.15116	12.7107	-6.1734	8.76492e-05	0.00108717	1.40001	ERK240min
Nrarp	NRARP		Notch-regulated ankyrin repeat protein	2.41534	4.15758	6.16981	8.80765e-05	0.00109125	1.3949	ERK240min
Dbx2	DBX2		developing brain homeobox 2	1.48207	6.22912	6.16729	8.8377e-05	0.00109425	1.39132	ERK240min
Ptgir	PTGIR	ENSMUST00000060386	prostaglandin I receptor (IP)	1.8071	2.92451	6.16722	8.83854e-05	0.00109425	1.39122	ERK240min
Tmsb15l	TMSB15A	ENSMUST00000127404	thymosin beta 15b like	-1.04356	5.65883	-6.16659	8.84608e-05	0.00109478	1.39032	ERK240min
Rpl10l	RPL10L	ENSMUST00000081908	ribosomal protein L10-like	-1.01251	11.2433	-6.16345	8.88393e-05	0.00109864	1.38583	ERK240min
Stx11	STX11	ENSMUST00000042861	syntaxin 11	1.60221	4.73078	6.16152	8.90714e-05	0.00110028	1.38309	ERK240min
Emilin2	EMILIN2		elastin microfibril interfacer 2	1.34903	6.98369	6.16028	8.92218e-05	0.00110172	1.38132	ERK240min
5830405M20Rik			RIKEN cDNA 5830405M20 gene	2.05465	2.7205	6.15821	8.94723e-05	0.00110317	1.37837	ERK240min
Crhbp	CRHBP	ENSMUST00000045583	corticotropin releasing hormone binding protein	2.08587	4.7749	6.15635	8.96989e-05	0.00110514	1.37571	ERK240min
Oxct2b	OXCT2		3-oxoacid CoA transferase 2B	1.91084	5.97831	6.15536	8.98189e-05	0.00110605	1.37431	ERK240min
Gabbr1	GABBR1		gamma-aminobutyric acid (GABA) B receptor, 1	-1.03569	9.93778	-6.15498	8.98655e-05	0.00110605	1.37376	ERK240min
Tmbim1	TMBIM1	ENSMUST00000113796	transmembrane BAX inhibitor motif containing 1	1.01718	10.5675	6.15233	9.01901e-05	0.00110954	1.36998	ERK240min
Stk35	STK35		serine/threonine kinase 35	-1.20371	10.6128	-6.14717	9.08244e-05	0.00111568	1.36261	ERK240min
Srl	SRL	ENSMUST00000090500	sarcalumenin	1.03135	8.71981	6.13643	9.21587e-05	0.00112831	1.34729	ERK240min
Slc7a8	SLC7A8	ENSMUST00000022787	solute carrier family 7 (cationic amino acid transporter, y+ system), member 8	1.66036	4.37703	6.13543	9.22842e-05	0.00112942	1.34586	ERK240min
9630041G16Rik		ENSMUST00000053681	RIKEN cDNA 9630041G16 gene	1.93184	4.13349	6.13278	9.26176e-05	0.00113225	1.34207	ERK240min
4930583H14Rik		ENSMUST00000038154	RIKEN cDNA 4930583H14 gene	-1.03646	11.1851	-6.13041	9.29175e-05	0.00113549	1.33867	ERK240min
Ly6h	LY6H		lymphocyte antigen 6 complex, locus H	-1.17866	8.55039	-6.12527	9.35692e-05	0.00114186	1.33133	ERK240min
Rnpep	RNPEP	ENSMUST00000077340	arginyl aminopeptidase (aminopeptidase B)	-1.20162	12.2019	-6.12212	9.3971e-05	0.00114583	1.32682	ERK240min
Vpreb1	VPREB1		pre-B lymphocyte gene 1	-1.3607	7.54226	-6.11799	9.45013e-05	0.00115153	1.32091	ERK240min
Fmr1nb	FMR1NB		fragile X mental retardation 1 neighbor	-1.15206	6.49785	-6.11335	9.51009e-05	0.00115672	1.31427	ERK240min
Tspan8	TSPAN8		tetraspanin 8	2.67808	5.50171	6.11145	9.53473e-05	0.00115877	1.31155	ERK240min
Dppa4	DPPA4		developmental pluripotency associated 4	1.04032	8.7181	6.1106	9.54589e-05	0.0011597	1.31032	ERK240min
Fam3b	FAM3B	ENSMUST00000049721	family with sequence similarity 3, member B	1.33837	3.93154	6.1078	9.58236e-05	0.00116328	1.30631	ERK240min
Btd	BTD		biotinidase	-1.06726	8.94084	-6.10703	9.59248e-05	0.00116365	1.3052	ERK240min
Asb4	ASB4	ENSMUST00000043294	ankyrin repeat and SOCS box-containing 4	2.22082	2.8722	6.09976	9.68809e-05	0.0011731	1.29478	ERK240min
Apobec2	APOBEC2	ENSMUST00000046549	apolipoprotein B mRNA editing enzyme, catalytic polypeptide 2	-2.82136	5.3445	-6.09725	9.72127e-05	0.00117525	1.29119	ERK240min
Myst4		ENSMUST00000112458	MYST histone acetyltransferase monocytic leukemia 4	-1.10627	10.2049	-6.09707	9.72363e-05	0.00117525	1.29093	ERK240min
Zic2	ZIC2		zinc finger protein of the cerebellum 2	-4.01186	8.43132	-6.09483	9.75342e-05	0.0011774	1.28772	ERK240min
4921517L17Rik			RIKEN cDNA 4921517L17 gene	1.2563	4.95528	6.08953	9.82435e-05	0.0011844	1.28011	ERK240min
Adh1	ADH1C	ENSMUST00000004232	alcohol dehydrogenase 1 (class I)	-2.55406	5.32083	-6.08413	9.89703e-05	0.00119142	1.27236	ERK240min
St6galnac6	ST6GALNAC6		ST6 (alpha-N-acetyl-neuraminyl-2,3-beta-galactosyl-1,3)-N-acetylgalactosaminide alpha-2,6-sialyltransferase 6	-1.48465	11.9541	-6.08222	9.92301e-05	0.00119398	1.26961	ERK240min
Nrxn1	NRXN1		neurexin I	1.84765	2.81503	6.08203	9.9255e-05	0.00119398	1.26934	ERK240min
Rps6ka5	RPS6KA5	ENSMUST00000110076	ribosomal protein S6 kinase, polypeptide 5	-1.11273	7.75926	-6.07855	9.97282e-05	0.0011988	1.26435	ERK240min
Twist1	TWIST1	ENSMUST00000049089	twist homolog 1 (Drosophila)	3.14831	6.37487	6.07721	9.99115e-05	0.00119932	1.26242	ERK240min
Cass4	CASS4	ENSMUST00000109136	Cas scaffolding protein family member 4	2.54347	5.89537	6.07718	9.99161e-05	0.00119932	1.26237	ERK240min
Crot	CROT	ENSMUST00000003720	carnitine O-octanoyltransferase	-1.41258	10.338	-6.07656	0.0001	0.00119933	1.26149	ERK240min
Vwa5a	VWA5A		von Willebrand factor A domain containing 5A	-1.51516	8.20719	-6.07649	0.000100011	0.00119933	1.26137	ERK240min
Lpar3	LPAR3	ENSMUST00000039164	lysophosphatidic acid receptor 3	-4.53111	4.49886	-6.07324	0.000100457	0.00120319	1.2567	ERK240min
Gabrp	GABRP	ENSMUST00000020366	gamma-aminobutyric acid (GABA) A receptor, pi	-2.19835	4.31639	-6.06665	0.000101367	0.00121058	1.24723	ERK240min
Pabpc1l	PABPC1L	ENSMUST00000067715	poly(A) binding protein, cytoplasmic 1-like	1.36144	5.96485	6.05824	0.00010254	0.00122195	1.23513	ERK240min
4933404M02Rik		ENSMUST00000123137	RIKEN cDNA 4933404M02 gene	1.60556	2.93244	6.05498	0.000103	0.00122611	1.23043	ERK240min
Lpar2	LPAR2	ENSMUST00000066018	lysophosphatidic acid receptor 2	1.22052	5.62336	6.05437	0.000103087	0.00122653	1.22955	ERK240min
Ptpn7	PTPN7	ENSMUST00000049449	protein tyrosine phosphatase, non-receptor type 7	1.26025	5.58888	6.05404	0.000103133	0.00122653	1.22908	ERK240min
Plk1s1		ENSMUST00000109980	polo-like kinase 1 substrate 1	-1.007	10.2631	-6.0454	0.000104362	0.00123787	1.21663	ERK240min
Slc35d2	SLC35D2		solute carrier family 35, member D2	1.04824	6.68573	6.04384	0.000104586	0.00124008	1.21437	ERK240min
Spon2	SPON2		spondin 2, extracellular matrix protein	-2.29289	5.95455	-6.04302	0.000104704	0.00124103	1.21319	ERK240min
Atxn7	ATXN7	ENSMUST00000022257	ataxin 7	-1.08599	6.59406	-6.04086	0.000105014	0.00124338	1.21008	ERK240min
Mbnl2	MBNL2		muscleblind-like 2	1.12161	6.6405	6.04028	0.000105099	0.00124393	1.20924	ERK240min
Samd9l	SAMD9L	ENSMUST00000001113	sterile alpha motif domain containing 9-like	-1.73066	4.91929	-6.0395	0.000105211	0.00124481	1.20812	ERK240min
2610028E06Rik		ENSMUST00000153589	RIKEN cDNA 2610028E06 gene	-2.08362	3.36744	-6.03889	0.000105299	0.0012449	1.20724	ERK240min
Plekhg5	PLEKHG5	ENSMUST00000105661	pleckstrin homology domain containing, family G (with RhoGef domain) member 5	-1.18241	13.2715	-6.03818	0.000105402	0.0012449	1.20621	ERK240min
Kitl	KITLG	ENSMUST00000099320	kit ligand	-1.11771	5.81546	-6.03814	0.000105407	0.0012449	1.20616	ERK240min
Rab15			RAB15, member RAS oncogene family	1.01921	12.9567	6.03603	0.000105713	0.00124597	1.20311	ERK240min
Cacna1g	CACNA1G		calcium channel, voltage-dependent, T type, alpha 1G subunit	-2.12586	4.15646	-6.03596	0.000105723	0.00124597	1.20302	ERK240min
Unc5cl	UNC5CL	ENSMUST00000161418	unc-5 homolog C (C. elegans)-like	-2.74798	4.79353	-6.03422	0.000105976	0.00124768	1.2005	ERK240min
D630045J12Rik	KIAA1549	ENSMUST00000144973	RIKEN cDNA D630045J12 gene	-1.59985	5.23074	-6.03102	0.000106444	0.00125179	1.19588	ERK240min
1700061G19Rik			RIKEN cDNA 1700061G19 gene	-1.0204	10.5548	-6.03014	0.000106573	0.00125287	1.19461	ERK240min
Pknox2	PKNOX2	ENSMUST00000039674	Pbx/knotted 1 homeobox 2	-2.55481	6.20763	-6.0235	0.000107549	0.001263	1.18502	ERK240min
Dnajc28	DNAJC28		DnaJ (Hsp40) homolog, subfamily C, member 28	-1.19458	4.80622	-6.02103	0.000107916	0.00126595	1.18145	ERK240min
Cx3cl1	CX3CL1	ENSMUST00000034230	chemokine (C-X3-C motif) ligand 1	-1.10806	7.39281	-6.01853	0.000108287	0.00126896	1.17784	ERK240min
Fam149a	FAM149A	ENSMUST00000093526	family with sequence similarity 149, member A	1.28594	5.38233	6.01513	0.000108796	0.00127402	1.17292	ERK240min
Fbp1	FBP1	ENSMUST00000092888	fructose bisphosphatase 1	-1.50329	7.71058	-6.01408	0.000108953	0.00127541	1.1714	ERK240min
Pdpn	PDPN	ENSMUST00000030317	podoplanin	-1.46775	7.24008	-6.01122	0.000109383	0.00127954	1.16726	ERK240min
Ccbl2	CCBL2	ENSMUST00000106217	cysteine conjugate-beta lyase 2	-1.00099	11.2089	-5.99748	0.000111472	0.00129801	1.14739	ERK240min
Ddr2	DDR2		discoidin domain receptor family, member 2	-2.33215	5.06514	-5.99138	0.000112414	0.00130622	1.13855	ERK240min
Fam84b	FAM84B		family with sequence similarity 84, member B	2.4318	4.66706	5.9901	0.000112614	0.00130791	1.13669	ERK240min
Nlrp4e	NLRP4	ENSMUST00000108444	NLR family, pyrin domain containing 4E	-1.70832	5.04521	-5.98817	0.000112913	0.00130989	1.1339	ERK240min
Angptl6	ANGPTL6		angiopoietin-like 6	1.03357	9.73656	5.98789	0.000112957	0.00130989	1.13348	ERK240min
Isl2	ISL2	ENSMUST00000034869	insulin related protein 2 (islet 2)	-3.47162	4.46128	-5.98687	0.000113117	0.00131116	1.132	ERK240min
St8sia1	ST8SIA1		ST8 alpha-N-acetyl-neuraminide alpha-2,8-sialyltransferase 1	-1.82342	7.21327	-5.98583	0.000113278	0.00131212	1.1305	ERK240min
Wscd2	WSCD2		WSC domain containing 2	-1.34071	10.2605	-5.97754	0.000114582	0.00132398	1.11848	ERK240min
Klf12	KLF12	ENSMUST00000097079	Kruppel-like factor 12	1.14611	8.41444	5.97648	0.00011475	0.00132546	1.11694	ERK240min
Il18	IL18	ENSMUST00000059081	interleukin 18	-1.78686	2.77021	-5.97565	0.000114883	0.00132652	1.11573	ERK240min
[truncated: 6,384 more rows]
