# Supplementary material for: Analogous mechanism regulating formation of neocortical basal radial glia and cerebellar Bergmann glia
Source: eLife. 2017 May 10;6:e23253. doi: 10.7554/eLife.23253 (PMC5457141; doi:10.7554/eLife.23253)
Supplement: Supplementary file 4. — (A) Lists of gene sets that are significantly enriched in human aRG (first spreadsheet) or mouse aRG (second spreadsheet). (B) Output of pathway preservation in human and mouse cortical coexpression networks (third spreadsheet). DOI: http://dx.doi.org/10.7554/eLife.23253.027 [file elife-23253-supp4.xlsx]

## Sheet: Network analysis
refSet	testSet	module	Z.summary	Zsummary.quality	Zdensity	Zconnectivity	Pathway
human	mouse	panRG	30.2627	31.4425	56.5327	3.99268	pan-RG
human	mouse	IPC	24.3715	20.5949	37.5864	11.1566	IPC
human	mouse	CellCycle	16.6015	10.7003	22.1852	11.0178	Cell Cycle
human	mouse	Focal-adhesion	11.5222	2.46932	7.98232	15.062	Focal Adhesion
human	mouse	bRG.genes	10.1022	12.3249	11.2352	8.96931	bRG
human	mouse	PI3K-Akt.signaling	8.28232	2.35341	5.1825	11.3821	PI3K-Akt
human	mouse	Hippo.signaling	8.00467	2.93248	6.49291	9.51643	Hippo
human	mouse	Wnt.Signaling	7.58002	0.997081	6.00033	9.1597	Wnt
human	mouse	Hh.signaling	7.30836	1.69723	5.83301	8.78371	Hedgehog
human	mouse	Notch	7.17429	1.54117	5.12292	9.22566	Notch
human	mouse	mTOR.Signaling	4.3869	-0.536062	2.52753	6.24627	mTOR
human	mouse	aRG.genes	2.81525	4.90128	2.36966	3.26084	aRG
human	mouse	Jak-STAT.Signaling	2.58656	-1.98958	0.759926	4.4132	Jak-STAT
human	mouse	ERK_response_2h	2.32554	1.33801	0.964217	3.68687	ERK-response
human	mouse	BMP.signaling	2.10708	1.84082	1.65551	2.55865	BMP
human	mouse	FGF.signaling	1.9963	1.12429	0.907984	3.08461	FGF

## Sheet: Enriched in human aRG
NAME	GS<br> follow link to MSigDB	GS DETAILS	SIZE	ES	NES	NOM p-val	FDR q-val	FWER p-val	RANK AT MAX	LEADING EDGE
HALLMARK_EPITHELIAL_MESENCHYMAL_TRANSITION%MSIGDB_C2%HALLMARK_EPITHELIAL_MESENCHYMAL_TRANSITION	HALLMARK_EPITHELIAL_MESENCHYMAL_TRANSITION%MSIGDB_C2%HALLMARK_EPITHELIAL_MESENCHYMAL_TRANSITION	Details ...	184	0.557782	2.25417	0	0	0	2684	tags=43%, list=17%, signal=51%
ECM PROTEOGLYCANS%REACTOME%R-HSA-3000178.1	ECM PROTEOGLYCANS%REACTOME%R-HSA-3000178.1	Details ...	52	0.679453	2.25125	0	0	0	2665	tags=48%, list=17%, signal=57%
HALLMARK_TNFA_SIGNALING_VIA_NFKB%MSIGDB_C2%HALLMARK_TNFA_SIGNALING_VIA_NFKB	HALLMARK_TNFA_SIGNALING_VIA_NFKB%MSIGDB_C2%HALLMARK_TNFA_SIGNALING_VIA_NFKB	Details ...	186	0.544372	2.20827	0	0.000288972	0.001	4142	tags=53%, list=26%, signal=71%
NABA_COLLAGENS%MSIGDB_C2%NABA_COLLAGENS	NABA_COLLAGENS%MSIGDB_C2%NABA_COLLAGENS	Details ...	42	0.653935	2.11073	0	0.000862542	0.004	2009	tags=45%, list=13%, signal=52%
EXTRACELLULAR MATRIX ORGANIZATION%REACTOME%R-HSA-1474244.1	EXTRACELLULAR MATRIX ORGANIZATION%REACTOME%R-HSA-1474244.1	Details ...	259	0.491816	2.06902	0	0.00172873	0.01	3874	tags=42%, list=24%, signal=55%
ERK_INDUCE_2HR	ERK_INDUCE_2HR	Details ...	41	0.64241	2.06124	0	0.00172759	0.012	1983	tags=41%, list=12%, signal=47%
PID_AVB3_INTEGRIN_PATHWAY%MSIGDB_C2%PID_AVB3_INTEGRIN_PATHWAY	PID_AVB3_INTEGRIN_PATHWAY%MSIGDB_C2%PID_AVB3_INTEGRIN_PATHWAY	Details ...	72	0.571045	2.02302	0	0.00285131	0.022	3404	tags=49%, list=21%, signal=61%
COLLAGEN BIOSYNTHESIS AND MODIFYING ENZYMES%REACTOME DATABASE ID RELEASE 57%1650814	COLLAGEN BIOSYNTHESIS AND MODIFYING ENZYMES%REACTOME DATABASE ID RELEASE 57%1650814	Details ...	65	0.574832	2.00292	0	0.00446124	0.039	2842	tags=45%, list=18%, signal=54%
COLLAGEN FORMATION%REACTOME%R-HSA-1474290.1	COLLAGEN FORMATION%REACTOME%R-HSA-1474290.1	Details ...	85	0.545158	1.99306	0	0.00512161	0.051	2842	tags=42%, list=18%, signal=51%
BETA1 INTEGRIN CELL SURFACE INTERACTIONS%PATHWAY INTERACTION DATABASE NCI-NATURE CURATED DATA%BETA1 INTEGRIN CELL SURFACE INTERACTIONS	BETA1 INTEGRIN CELL SURFACE INTERACTIONS%PATHWAY INTERACTION DATABASE NCI-NATURE CURATED DATA%BETA1 INTEGRIN CELL SURFACE INTERACTIONS	Details ...	66	0.553458	1.96965	0	0.00748211	0.081	2186	tags=36%, list=14%, signal=42%
PID_SYNDECAN_1_PATHWAY%MSIGDB_C2%PID_SYNDECAN_1_PATHWAY	PID_SYNDECAN_1_PATHWAY%MSIGDB_C2%PID_SYNDECAN_1_PATHWAY	Details ...	45	0.604554	1.96102	0	0.0076682	0.092	1807	tags=36%, list=11%, signal=40%
INTEGRINS IN ANGIOGENESIS%PATHWAY INTERACTION DATABASE NCI-NATURE CURATED DATA%INTEGRINS IN ANGIOGENESIS	INTEGRINS IN ANGIOGENESIS%PATHWAY INTERACTION DATABASE NCI-NATURE CURATED DATA%INTEGRINS IN ANGIOGENESIS	Details ...	59	0.571685	1.95544	0	0.0075354	0.099	3404	tags=53%, list=21%, signal=66%
PID_INTEGRIN1_PATHWAY%MSIGDB_C2%PID_INTEGRIN1_PATHWAY	PID_INTEGRIN1_PATHWAY%MSIGDB_C2%PID_INTEGRIN1_PATHWAY	Details ...	66	0.553458	1.93722	0	0.0090239	0.126	2186	tags=36%, list=14%, signal=42%
BG_MODULE	BG_MODULE	Details ...	320	0.445092	1.91353	0	0.0125486	0.182	3084	tags=39%, list=19%, signal=47%
INTEGRIN CELL SURFACE INTERACTIONS%REACTOME%R-HSA-216083.1	INTEGRIN CELL SURFACE INTERACTIONS%REACTOME%R-HSA-216083.1	Details ...	62	0.548927	1.91167	0	0.0119443	0.185	3874	tags=45%, list=24%, signal=59%
INTEGRIN FAMILY CELL SURFACE INTERACTIONS%PATHWAY INTERACTION DATABASE NCI-NATURE CURATED DATA%INTEGRIN FAMILY CELL SURFACE INTERACTIONS	INTEGRIN FAMILY CELL SURFACE INTERACTIONS%PATHWAY INTERACTION DATABASE NCI-NATURE CURATED DATA%INTEGRIN FAMILY CELL SURFACE INTERACTIONS	Details ...	23	0.657924	1.88881	0.00170648	0.01724	0.272	2947	tags=48%, list=18%, signal=59%
PID_INTEGRIN_CS_PATHWAY%MSIGDB_C2%PID_INTEGRIN_CS_PATHWAY	PID_INTEGRIN_CS_PATHWAY%MSIGDB_C2%PID_INTEGRIN_CS_PATHWAY	Details ...	23	0.657924	1.88876	0	0.0162259	0.272	2947	tags=48%, list=18%, signal=59%
NABA_CORE_MATRISOME%MSIGDB_C2%NABA_CORE_MATRISOME	NABA_CORE_MATRISOME%MSIGDB_C2%NABA_CORE_MATRISOME	Details ...	249	0.445746	1.86696	0	0.0217536	0.359	2842	tags=31%, list=18%, signal=37%
INTEGRIN SIGNALLING PATHWAY%PANTHER PATHWAY%P00034	INTEGRIN SIGNALLING PATHWAY%PANTHER PATHWAY%P00034	Details ...	154	0.46828	1.85849	0	0.0234422	0.394	2362	tags=30%, list=15%, signal=35%
PID_INTEGRIN3_PATHWAY%MSIGDB_C2%PID_INTEGRIN3_PATHWAY	PID_INTEGRIN3_PATHWAY%MSIGDB_C2%PID_INTEGRIN3_PATHWAY	Details ...	40	0.576126	1.83334	0.00162866	0.032634	0.513	2186	tags=38%, list=14%, signal=43%
HALLMARK_UV_RESPONSE_DN%MSIGDB_C2%HALLMARK_UV_RESPONSE_DN	HALLMARK_UV_RESPONSE_DN%MSIGDB_C2%HALLMARK_UV_RESPONSE_DN		135	0.468055	1.83178	0	0.031829	0.521	3039	tags=39%, list=19%, signal=47%
ASSEMBLY OF COLLAGEN FIBRILS AND OTHER MULTIMERIC STRUCTURES%REACTOME%R-HSA-2022090.2	ASSEMBLY OF COLLAGEN FIBRILS AND OTHER MULTIMERIC STRUCTURES%REACTOME%R-HSA-2022090.2		51	0.551028	1.82881	0.00327869	0.031291	0.531	3012	tags=45%, list=19%, signal=55%
BETA3 INTEGRIN CELL SURFACE INTERACTIONS%PATHWAY INTERACTION DATABASE NCI-NATURE CURATED DATA%BETA3 INTEGRIN CELL SURFACE INTERACTIONS	BETA3 INTEGRIN CELL SURFACE INTERACTIONS%PATHWAY INTERACTION DATABASE NCI-NATURE CURATED DATA%BETA3 INTEGRIN CELL SURFACE INTERACTIONS		40	0.576126	1.80542	0	0.0419185	0.654	2186	tags=38%, list=14%, signal=43%
BG_SPECIFIC	BG_SPECIFIC		104	0.476434	1.79946	0	0.0435468	0.689	2075	tags=36%, list=13%, signal=41%
FGFR2 LIGAND BINDING AND ACTIVATION%REACTOME DATABASE ID RELEASE 57%190241	FGFR2 LIGAND BINDING AND ACTIVATION%REACTOME DATABASE ID RELEASE 57%190241		15	0.685252	1.78167	0.00340715	0.0523936	0.765	1676	tags=27%, list=10%, signal=30%
SMOOTH MUSCLE CONTRACTION%REACTOME DATABASE ID RELEASE 57%445355	SMOOTH MUSCLE CONTRACTION%REACTOME DATABASE ID RELEASE 57%445355		25	0.605201	1.76544	0	0.0611076	0.829	1624	tags=40%, list=10%, signal=44%
IL4-MEDIATED SIGNALING EVENTS%PATHWAY INTERACTION DATABASE NCI-NATURE CURATED DATA%IL4-MEDIATED SIGNALING EVENTS	IL4-MEDIATED SIGNALING EVENTS%PATHWAY INTERACTION DATABASE NCI-NATURE CURATED DATA%IL4-MEDIATED SIGNALING EVENTS		55	0.516096	1.7467	0.00307692	0.0738014	0.896	1845	tags=22%, list=12%, signal=25%
HALLMARK_MYOGENESIS%MSIGDB_C2%HALLMARK_MYOGENESIS	HALLMARK_MYOGENESIS%MSIGDB_C2%HALLMARK_MYOGENESIS		188	0.429232	1.7399	0	0.0773464	0.917	3488	tags=31%, list=22%, signal=40%
CONSTITUTIVE SIGNALING BY ABERRANT PI3K IN CANCER%REACTOME DATABASE ID RELEASE 57%2219530	CONSTITUTIVE SIGNALING BY ABERRANT PI3K IN CANCER%REACTOME DATABASE ID RELEASE 57%2219530		46	0.526808	1.73841	0	0.0765584	0.921	2246	tags=33%, list=14%, signal=38%
HALLMARK_APOPTOSIS%MSIGDB_C2%HALLMARK_APOPTOSIS	HALLMARK_APOPTOSIS%MSIGDB_C2%HALLMARK_APOPTOSIS		151	0.437	1.72818	0	0.0840576	0.948	3257	tags=39%, list=20%, signal=49%
CHONDROITIN SULFATE BIOSYNTHESIS%REACTOME%R-HSA-2022870.1	CHONDROITIN SULFATE BIOSYNTHESIS%REACTOME%R-HSA-2022870.1		18	0.649946	1.72615	0	0.0831344	0.951	3378	tags=67%, list=21%, signal=84%
SALM PROTEIN INTERACTIONS AT THE SYNAPSES%REACTOME%R-HSA-8849932.2	SALM PROTEIN INTERACTIONS AT THE SYNAPSES%REACTOME%R-HSA-8849932.2		18	0.644047	1.72456	0.00675676	0.0819751	0.951	3553	tags=50%, list=22%, signal=64%
LAMININ INTERACTIONS%REACTOME DATABASE ID RELEASE 57%3000157	LAMININ INTERACTIONS%REACTOME DATABASE ID RELEASE 57%3000157		23	0.618361	1.72344	0.00650406	0.0803099	0.952	2947	tags=52%, list=18%, signal=64%
ION TRANSPORT BY P-TYPE ATPASES%REACTOME%R-HSA-936837.2	ION TRANSPORT BY P-TYPE ATPASES%REACTOME%R-HSA-936837.2		48	0.520709	1.72286	0	0.0784083	0.953	3978	tags=44%, list=25%, signal=58%
INTERLEUKIN-6 FAMILY SIGNALING%REACTOME DATABASE ID RELEASE 57%6783589	INTERLEUKIN-6 FAMILY SIGNALING%REACTOME DATABASE ID RELEASE 57%6783589		25	0.603829	1.71905	0.00500835	0.0800239	0.959	3142	tags=48%, list=20%, signal=60%
ERK_INDUCE_4HR	ERK_INDUCE_4HR		435	0.390041	1.71692	0	0.0796387	0.962	4116	tags=37%, list=26%, signal=49%
PID_INTEGRIN2_PATHWAY%MSIGDB_C2%PID_INTEGRIN2_PATHWAY	PID_INTEGRIN2_PATHWAY%MSIGDB_C2%PID_INTEGRIN2_PATHWAY		24	0.586905	1.70776	0.00517241	0.0854095	0.974	4214	tags=50%, list=26%, signal=68%
PID_FGF_PATHWAY%MSIGDB_C2%PID_FGF_PATHWAY	PID_FGF_PATHWAY%MSIGDB_C2%PID_FGF_PATHWAY		53	0.502785	1.70253	0.0015015	0.0882099	0.979	3276	tags=40%, list=20%, signal=50%
PID_IL4_2PATHWAY%MSIGDB_C2%PID_IL4_2PATHWAY	PID_IL4_2PATHWAY%MSIGDB_C2%PID_IL4_2PATHWAY		56	0.505751	1.69748	0.00154321	0.0912392	0.983	1845	tags=21%, list=12%, signal=24%
PID_ERBB_NETWORK_PATHWAY%MSIGDB_C2%PID_ERBB_NETWORK_PATHWAY	PID_ERBB_NETWORK_PATHWAY%MSIGDB_C2%PID_ERBB_NETWORK_PATHWAY		15	0.660108	1.69076	0.0154639	0.0957165	0.99	2158	tags=60%, list=13%, signal=69%
SIGNALING EVENTS MEDIATED BY TCPTP%PATHWAY INTERACTION DATABASE NCI-NATURE CURATED DATA%SIGNALING EVENTS MEDIATED BY TCPTP	SIGNALING EVENTS MEDIATED BY TCPTP%PATHWAY INTERACTION DATABASE NCI-NATURE CURATED DATA%SIGNALING EVENTS MEDIATED BY TCPTP		36	0.536011	1.68435	0.00805153	0.100779	0.994	3258	tags=42%, list=20%, signal=52%
ELASTIC FIBRE FORMATION%REACTOME DATABASE ID RELEASE 57%1566948	ELASTIC FIBRE FORMATION%REACTOME DATABASE ID RELEASE 57%1566948		37	0.526362	1.68427	0.00494234	0.0984209	0.994	3428	tags=43%, list=21%, signal=55%
ERBB RECEPTOR SIGNALING NETWORK%PATHWAY INTERACTION DATABASE NCI-NATURE CURATED DATA%ERBB RECEPTOR SIGNALING NETWORK	ERBB RECEPTOR SIGNALING NETWORK%PATHWAY INTERACTION DATABASE NCI-NATURE CURATED DATA%ERBB RECEPTOR SIGNALING NETWORK		15	0.660108	1.67946	0.0122164	0.101215	0.996	2158	tags=60%, list=13%, signal=69%
HALLMARK_ANDROGEN_RESPONSE%MSIGDB_C2%HALLMARK_ANDROGEN_RESPONSE	HALLMARK_ANDROGEN_RESPONSE%MSIGDB_C2%HALLMARK_ANDROGEN_RESPONSE		88	0.458788	1.67522	0	0.103785	0.997	3298	tags=39%, list=21%, signal=48%
SYNDECAN-1-MEDIATED SIGNALING EVENTS%PATHWAY INTERACTION DATABASE NCI-NATURE CURATED DATA%SYNDECAN-1-MEDIATED SIGNALING EVENTS	SYNDECAN-1-MEDIATED SIGNALING EVENTS%PATHWAY INTERACTION DATABASE NCI-NATURE CURATED DATA%SYNDECAN-1-MEDIATED SIGNALING EVENTS		37	0.532186	1.6709	0	0.106463	0.998	2150	tags=35%, list=13%, signal=40%
NABA_ECM_AFFILIATED%MSIGDB_C2%NABA_ECM_AFFILIATED	NABA_ECM_AFFILIATED%MSIGDB_C2%NABA_ECM_AFFILIATED		111	0.444803	1.66866	0	0.106548	0.998	4236	tags=40%, list=26%, signal=53%
SYNTHESIS OF PC%REACTOME%R-HSA-1483191.3	SYNTHESIS OF PC%REACTOME%R-HSA-1483191.3		19	0.619741	1.66784	0.0118044	0.105281	0.998	3120	tags=47%, list=19%, signal=59%
PLATELET CALCIUM HOMEOSTASIS%REACTOME%R-HSA-418360.1	PLATELET CALCIUM HOMEOSTASIS%REACTOME%R-HSA-418360.1		26	0.581587	1.65943	0.00646204	0.112338	0.998	3978	tags=58%, list=25%, signal=77%
FAS SIGNALING PATHWAY%PANTHER PATHWAY%P00020	FAS SIGNALING PATHWAY%PANTHER PATHWAY%P00020		29	0.556227	1.65556	0.0109546	0.11432	0.999	1666	tags=34%, list=10%, signal=38%
VALIDATED TRANSCRIPTIONAL TARGETS OF AP1 FAMILY MEMBERS FRA1 AND FRA2%PATHWAY INTERACTION DATABASE NCI-NATURE CURATED DATA%VALIDATED TRANSCRIPTIONAL TARGETS OF AP1 FAMILY MEMBERS FRA1 AND FRA2	VALIDATED TRANSCRIPTIONAL TARGETS OF AP1 FAMILY MEMBERS FRA1 AND FRA2%PATHWAY INTERACTION DATABASE NCI-NATURE CURATED DATA%VALIDATED TRANSCRIPTIONAL TARGETS OF AP1 FAMILY MEMBERS FRA1 AND FRA2		30	0.539948	1.65519	0.0125786	0.112347	0.999	2548	tags=43%, list=16%, signal=51%
BETA2 INTEGRIN CELL SURFACE INTERACTIONS%PATHWAY INTERACTION DATABASE NCI-NATURE CURATED DATA%BETA2 INTEGRIN CELL SURFACE INTERACTIONS	BETA2 INTEGRIN CELL SURFACE INTERACTIONS%PATHWAY INTERACTION DATABASE NCI-NATURE CURATED DATA%BETA2 INTEGRIN CELL SURFACE INTERACTIONS		24	0.586905	1.65517	0.00510204	0.110145	0.999	4214	tags=50%, list=26%, signal=68%
MISCELLANEOUS TRANSPORT AND BINDING EVENTS%REACTOME DATABASE ID RELEASE 57%5223345	MISCELLANEOUS TRANSPORT AND BINDING EVENTS%REACTOME DATABASE ID RELEASE 57%5223345		17	0.63484	1.65471	0.0143369	0.108664	0.999	4023	tags=59%, list=25%, signal=78%
GABA RECEPTOR ACTIVATION%REACTOME%R-HSA-977443.1	GABA RECEPTOR ACTIVATION%REACTOME%R-HSA-977443.1		53	0.485287	1.64789	0	0.11417	1	3910	tags=47%, list=24%, signal=62%
DEGRADATION OF THE EXTRACELLULAR MATRIX%REACTOME%R-HSA-1474228.3	DEGRADATION OF THE EXTRACELLULAR MATRIX%REACTOME%R-HSA-1474228.3		93	0.448199	1.64364	0	0.117074	1	1195	tags=19%, list=7%, signal=21%
GABA B RECEPTOR ACTIVATION%REACTOME%R-HSA-977444.1	GABA B RECEPTOR ACTIVATION%REACTOME%R-HSA-977444.1		37	0.523142	1.63995	0.00321027	0.118966	1	2982	tags=41%, list=19%, signal=50%
NON-INTEGRIN MEMBRANE-ECM INTERACTIONS%REACTOME DATABASE ID RELEASE 57%3000171	NON-INTEGRIN MEMBRANE-ECM INTERACTIONS%REACTOME DATABASE ID RELEASE 57%3000171		41	0.511507	1.63933	0.00479233	0.117463	1	2665	tags=39%, list=17%, signal=47%
NETRIN-1 SIGNALING%REACTOME DATABASE ID RELEASE 57%373752	NETRIN-1 SIGNALING%REACTOME DATABASE ID RELEASE 57%373752		38	0.515937	1.63169	0.00966184	0.124613	1	4078	tags=53%, list=25%, signal=70%
NEGATIVE REGULATION OF FGFR1 SIGNALING%REACTOME DATABASE ID RELEASE 57%5654726	NEGATIVE REGULATION OF FGFR1 SIGNALING%REACTOME DATABASE ID RELEASE 57%5654726		21	0.588584	1.6302	0.0192308	0.124471	1	2246	tags=33%, list=14%, signal=39%
HALLMARK_INTERFERON_ALPHA_RESPONSE%MSIGDB_C2%HALLMARK_INTERFERON_ALPHA_RESPONSE	HALLMARK_INTERFERON_ALPHA_RESPONSE%MSIGDB_C2%HALLMARK_INTERFERON_ALPHA_RESPONSE		79	0.449312	1.63019	0.00298954	0.122361	1	3293	tags=44%, list=21%, signal=55%
ACTIVATION OF GABAB RECEPTORS%REACTOME DATABASE ID RELEASE 57%991365	ACTIVATION OF GABAB RECEPTORS%REACTOME DATABASE ID RELEASE 57%991365		37	0.523142	1.62513	0.00505051	0.126515	1	2982	tags=41%, list=19%, signal=50%
BIOCARTA_AMI_PATHWAY%MSIGDB_C2%BIOCARTA_AMI_PATHWAY	BIOCARTA_AMI_PATHWAY%MSIGDB_C2%BIOCARTA_AMI_PATHWAY		18	0.599225	1.6208	0.0238095	0.130219	1	2009	tags=28%, list=13%, signal=32%
AMB2 INTEGRIN SIGNALING%PATHWAY INTERACTION DATABASE NCI-NATURE CURATED DATA%AMB2 INTEGRIN SIGNALING	AMB2 INTEGRIN SIGNALING%PATHWAY INTERACTION DATABASE NCI-NATURE CURATED DATA%AMB2 INTEGRIN SIGNALING		26	0.5676	1.62004	0.01473	0.129142	1	4453	tags=54%, list=28%, signal=74%
NABA_BASEMENT_MEMBRANES%MSIGDB_C2%NABA_BASEMENT_MEMBRANES	NABA_BASEMENT_MEMBRANES%MSIGDB_C2%NABA_BASEMENT_MEMBRANES		36	0.522871	1.61719	0.00830565	0.130727	1	2735	tags=42%, list=17%, signal=50%
PID_FRA_PATHWAY%MSIGDB_C2%PID_FRA_PATHWAY	PID_FRA_PATHWAY%MSIGDB_C2%PID_FRA_PATHWAY		30	0.539948	1.60481	0.0112721	0.14508	1	2548	tags=43%, list=16%, signal=51%
GLYCOSAMINOGLYCAN METABOLISM%REACTOME%R-HSA-1630316.2	GLYCOSAMINOGLYCAN METABOLISM%REACTOME%R-HSA-1630316.2		108	0.42007	1.59901	0.00290698	0.150713	1	4458	tags=51%, list=28%, signal=70%
NEGATIVE REGULATION OF FGFR3 SIGNALING%REACTOME DATABASE ID RELEASE 57%5654732	NEGATIVE REGULATION OF FGFR3 SIGNALING%REACTOME DATABASE ID RELEASE 57%5654732		19	0.592775	1.59726	0.016835	0.150817	1	2246	tags=37%, list=14%, signal=43%
NEGATIVE REGULATION OF FGFR2 SIGNALING%REACTOME DATABASE ID RELEASE 57%5654727	NEGATIVE REGULATION OF FGFR2 SIGNALING%REACTOME DATABASE ID RELEASE 57%5654727		24	0.551836	1.59711	0.0200669	0.148787	1	2246	tags=29%, list=14%, signal=34%
ION HOMEOSTASIS%REACTOME DATABASE ID RELEASE 57%5578775	ION HOMEOSTASIS%REACTOME DATABASE ID RELEASE 57%5578775		44	0.493989	1.5959	0.00938967	0.148419	1	4191	tags=50%, list=26%, signal=68%
PID_TCPTP_PATHWAY%MSIGDB_C2%PID_TCPTP_PATHWAY	PID_TCPTP_PATHWAY%MSIGDB_C2%PID_TCPTP_PATHWAY		39	0.504534	1.59342	0.00461538	0.149802	1	3258	tags=41%, list=20%, signal=51%
PLATELET DEGRANULATION%REACTOME%R-HSA-114608.2	PLATELET DEGRANULATION%REACTOME%R-HSA-114608.2		107	0.421465	1.593	0.00145349	0.148372	1	4673	tags=43%, list=29%, signal=60%
MUSCLE CONTRACTION%REACTOME%R-HSA-397014.2	MUSCLE CONTRACTION%REACTOME%R-HSA-397014.2		175	0.391884	1.59208	0	0.147742	1	4213	tags=38%, list=26%, signal=51%
RESPONSE TO ELEVATED PLATELET CYTOSOLIC CA2+%REACTOME DATABASE ID RELEASE 57%76005	RESPONSE TO ELEVATED PLATELET CYTOSOLIC CA2+%REACTOME DATABASE ID RELEASE 57%76005		112	0.41851	1.58506	0.00707214	0.155575	1	3925	tags=37%, list=24%, signal=48%
UNBLOCKING OF NMDA RECEPTOR, GLUTAMATE BINDING AND ACTIVATION%REACTOME DATABASE ID RELEASE 57%438066	UNBLOCKING OF NMDA RECEPTOR, GLUTAMATE BINDING AND ACTIVATION%REACTOME DATABASE ID RELEASE 57%438066		17	0.596205	1.58424	0.0250417	0.154779	1	3553	tags=53%, list=22%, signal=68%
P38 MAPK PATHWAY%PANTHER PATHWAY%P05918	P38 MAPK PATHWAY%PANTHER PATHWAY%P05918		30	0.523721	1.57981	0.0200334	0.159514	1	2468	tags=33%, list=15%, signal=39%
BIOCARTA_UCALPAIN_PATHWAY%MSIGDB_C2%BIOCARTA_UCALPAIN_PATHWAY	BIOCARTA_UCALPAIN_PATHWAY%MSIGDB_C2%BIOCARTA_UCALPAIN_PATHWAY		16	0.609879	1.5754	0.0238501	0.164133	1	4049	tags=50%, list=25%, signal=67%
BIOCARTA_TEL_PATHWAY%MSIGDB_C2%BIOCARTA_TEL_PATHWAY	BIOCARTA_TEL_PATHWAY%MSIGDB_C2%BIOCARTA_TEL_PATHWAY		18	0.583669	1.57374	0.0318792	0.16444	1	2158	tags=44%, list=13%, signal=51%
NCAM1 INTERACTIONS%REACTOME DATABASE ID RELEASE 57%419037	NCAM1 INTERACTIONS%REACTOME DATABASE ID RELEASE 57%419037		35	0.506818	1.56985	0.0178282	0.167966	1	2009	tags=26%, list=13%, signal=29%
NABA_SECRETED_FACTORS%MSIGDB_C2%NABA_SECRETED_FACTORS	NABA_SECRETED_FACTORS%MSIGDB_C2%NABA_SECRETED_FACTORS		266	0.37543	1.5678	0	0.168917	1	4291	tags=31%, list=27%, signal=42%
BIOCARTA_AGR_PATHWAY%MSIGDB_C2%BIOCARTA_AGR_PATHWAY	BIOCARTA_AGR_PATHWAY%MSIGDB_C2%BIOCARTA_AGR_PATHWAY		34	0.509456	1.56719	0.010574	0.167603	1	3351	tags=38%, list=21%, signal=48%
FGF SIGNALING PATHWAY%PATHWAY INTERACTION DATABASE NCI-NATURE CURATED DATA%FGF SIGNALING PATHWAY	FGF SIGNALING PATHWAY%PATHWAY INTERACTION DATABASE NCI-NATURE CURATED DATA%FGF SIGNALING PATHWAY		44	0.483792	1.56107	0.0109546	0.174825	1	3276	tags=41%, list=20%, signal=51%
NABA_ECM_GLYCOPROTEINS%MSIGDB_C2%NABA_ECM_GLYCOPROTEINS	NABA_ECM_GLYCOPROTEINS%MSIGDB_C2%NABA_ECM_GLYCOPROTEINS		174	0.391227	1.56058	0	0.173507	1	4757	tags=45%, list=30%, signal=63%
STABILIZATION AND EXPANSION OF THE E-CADHERIN ADHERENS JUNCTION%PATHWAY INTERACTION DATABASE NCI-NATURE CURATED DATA%STABILIZATION AND EXPANSION OF THE E-CADHERIN ADHERENS JUNCTION	STABILIZATION AND EXPANSION OF THE E-CADHERIN ADHERENS JUNCTION%PATHWAY INTERACTION DATABASE NCI-NATURE CURATED DATA%STABILIZATION AND EXPANSION OF THE E-CADHERIN ADHERENS JUNCTION		36	0.498	1.55655	0.0130293	0.177843	1	3177	tags=31%, list=20%, signal=38%
TGF-BETA SIGNALING PATHWAY%PANTHER PATHWAY%P00052	TGF-BETA SIGNALING PATHWAY%PANTHER PATHWAY%P00052		84	0.427759	1.5538	0.00768049	0.179906	1	4270	tags=32%, list=27%, signal=44%
ELEVATION OF CYTOSOLIC CA2+ LEVELS%REACTOME DATABASE ID RELEASE 57%139853	ELEVATION OF CYTOSOLIC CA2+ LEVELS%REACTOME DATABASE ID RELEASE 57%139853		15	0.610581	1.55034	0.0302521	0.183274	1	3410	tags=60%, list=21%, signal=76%
HALLMARK_APICAL_SURFACE%MSIGDB_C2%HALLMARK_APICAL_SURFACE	HALLMARK_APICAL_SURFACE%MSIGDB_C2%HALLMARK_APICAL_SURFACE		42	0.486022	1.54966	0.0127796	0.182198	1	3201	tags=38%, list=20%, signal=47%
KERATAN SULFATE KERATIN METABOLISM%REACTOME DATABASE ID RELEASE 57%1638074	KERATAN SULFATE KERATIN METABOLISM%REACTOME DATABASE ID RELEASE 57%1638074		27	0.52271	1.54851	0.0278689	0.182102	1	3791	tags=48%, list=24%, signal=63%
HALLMARK_INFLAMMATORY_RESPONSE%MSIGDB_C2%HALLMARK_INFLAMMATORY_RESPONSE	HALLMARK_INFLAMMATORY_RESPONSE%MSIGDB_C2%HALLMARK_INFLAMMATORY_RESPONSE		187	0.375987	1.54482	0.00136054	0.186052	1	5310	tags=50%, list=33%, signal=74%
G ALPHA (I) SIGNALLING EVENTS%REACTOME%R-HSA-418594.2	G ALPHA (I) SIGNALLING EVENTS%REACTOME%R-HSA-418594.2		195	0.376392	1.54282	0	0.187282	1	3932	tags=33%, list=25%, signal=43%
IL-6-TYPE CYTOKINE RECEPTOR LIGAND INTERACTIONS%REACTOME DATABASE ID RELEASE 57%6788467	IL-6-TYPE CYTOKINE RECEPTOR LIGAND INTERACTIONS%REACTOME DATABASE ID RELEASE 57%6788467		19	0.56692	1.54261	0.0298013	0.185531	1	3142	tags=47%, list=20%, signal=59%
NEGATIVE REGULATION OF FGFR4 SIGNALING%REACTOME DATABASE ID RELEASE 57%5654733	NEGATIVE REGULATION OF FGFR4 SIGNALING%REACTOME DATABASE ID RELEASE 57%5654733		23	0.541034	1.53824	0.0231405	0.190892	1	2246	tags=35%, list=14%, signal=40%
MOLECULES ASSOCIATED WITH ELASTIC FIBRES%REACTOME%R-HSA-2129379.1	MOLECULES ASSOCIATED WITH ELASTIC FIBRES%REACTOME%R-HSA-2129379.1		27	0.516605	1.5267	0.0268562	0.208468	1	2565	tags=33%, list=16%, signal=40%
CA2+ PATHWAY%REACTOME DATABASE ID RELEASE 57%4086398	CA2+ PATHWAY%REACTOME DATABASE ID RELEASE 57%4086398		56	0.446826	1.52594	0.0102489	0.207648	1	2072	tags=29%, list=13%, signal=33%
EGF RECEPTOR SIGNALING PATHWAY%PANTHER PATHWAY%P00018	EGF RECEPTOR SIGNALING PATHWAY%PANTHER PATHWAY%P00018		106	0.402463	1.52097	0.00863309	0.214343	1	2468	tags=29%, list=15%, signal=34%
ALPHA6BETA4INTEGRIN%NETPATH%ALPHA6BETA4INTEGRIN	ALPHA6BETA4INTEGRIN%NETPATH%ALPHA6BETA4INTEGRIN		69	0.432409	1.52093	0.0046083	0.212156	1	3167	tags=35%, list=20%, signal=43%
HEPARAN SULFATE HEPARIN (HS-GAG) METABOLISM%REACTOME DATABASE ID RELEASE 57%1638091	HEPARAN SULFATE HEPARIN (HS-GAG) METABOLISM%REACTOME DATABASE ID RELEASE 57%1638091		47	0.462239	1.52004	0.0243112	0.211751	1	4178	tags=55%, list=26%, signal=75%
EFFECTS OF PIP2 HYDROLYSIS%REACTOME%R-HSA-114508.1	EFFECTS OF PIP2 HYDROLYSIS%REACTOME%R-HSA-114508.1		25	0.52788	1.51616	0.0353535	0.216452	1	1286	tags=32%, list=8%, signal=35%
PI5P, PP2A AND IER3 REGULATE PI3K AKT SIGNALING%REACTOME%R-HSA-6811558.1	PI5P, PP2A AND IER3 REGULATE PI3K AKT SIGNALING%REACTOME%R-HSA-6811558.1		66	0.429247	1.51501	0.0137195	0.21641	1	2246	tags=27%, list=14%, signal=32%
CHONDROITIN SULFATE DERMATAN SULFATE METABOLISM%REACTOME DATABASE ID RELEASE 57%1793185	CHONDROITIN SULFATE DERMATAN SULFATE METABOLISM%REACTOME DATABASE ID RELEASE 57%1793185		45	0.473451	1.51081	0.0189274	0.221909	1	3378	tags=51%, list=21%, signal=65%
POTASSIUM CHANNELS%REACTOME DATABASE ID RELEASE 57%1296071	POTASSIUM CHANNELS%REACTOME DATABASE ID RELEASE 57%1296071		94	0.406036	1.50842	0.0116279	0.2235	1	2250	tags=24%, list=14%, signal=28%
PID_ECADHERIN_STABILIZATION_PATHWAY%MSIGDB_C2%PID_ECADHERIN_STABILIZATION_PATHWAY	PID_ECADHERIN_STABILIZATION_PATHWAY%MSIGDB_C2%PID_ECADHERIN_STABILIZATION_PATHWAY		37	0.482853	1.50202	0.033123	0.233209	1	3177	tags=30%, list=20%, signal=37%
GLYPICAN 1 NETWORK%PATHWAY INTERACTION DATABASE NCI-NATURE CURATED DATA%GLYPICAN 1 NETWORK	GLYPICAN 1 NETWORK%PATHWAY INTERACTION DATABASE NCI-NATURE CURATED DATA%GLYPICAN 1 NETWORK		24	0.526117	1.4997	0.047541	0.235491	1	3651	tags=46%, list=23%, signal=59%
PID_AMB2_NEUTROPHILS_PATHWAY%MSIGDB_C2%PID_AMB2_NEUTROPHILS_PATHWAY	PID_AMB2_NEUTROPHILS_PATHWAY%MSIGDB_C2%PID_AMB2_NEUTROPHILS_PATHWAY		35	0.484913	1.49872	0.0304	0.234994	1	4453	tags=49%, list=28%, signal=67%
UROKINASE-TYPE PLASMINOGEN ACTIVATOR (UPA) AND UPAR-MEDIATED SIGNALING%PATHWAY INTERACTION DATABASE NCI-NATURE CURATED DATA%UROKINASE-TYPE PLASMINOGEN ACTIVATOR (UPA) AND UPAR-MEDIATED SIGNALING	UROKINASE-TYPE PLASMINOGEN ACTIVATOR (UPA) AND UPAR-MEDIATED SIGNALING%PATHWAY INTERACTION DATABASE NCI-NATURE CURATED DATA%UROKINASE-TYPE PLASMINOGEN ACTIVATOR (UPA) AND UPAR-MEDIATED SIGNALING		35	0.478921	1.49427	0.0286624	0.241284	1	3167	tags=40%, list=20%, signal=50%
AQUAPORIN-MEDIATED TRANSPORT%REACTOME%R-HSA-445717.1	AQUAPORIN-MEDIATED TRANSPORT%REACTOME%R-HSA-445717.1		45	0.454618	1.49331	0.0274809	0.240924	1	2448	tags=31%, list=15%, signal=37%
SYNDECAN INTERACTIONS%REACTOME DATABASE ID RELEASE 57%3000170	SYNDECAN INTERACTIONS%REACTOME DATABASE ID RELEASE 57%3000170		19	0.546228	1.49263	0.039604	0.239921	1	2197	tags=42%, list=14%, signal=49%
NEURONAL SYSTEM%REACTOME DATABASE ID RELEASE 57%112316	NEURONAL SYSTEM%REACTOME DATABASE ID RELEASE 57%112316		305	0.349352	1.49214	0.0012285	0.238618	1	3963	tags=35%, list=25%, signal=46%
GLYCEROPHOSPHOLIPID BIOSYNTHESIS%REACTOME%R-HSA-1483206.2	GLYCEROPHOSPHOLIPID BIOSYNTHESIS%REACTOME%R-HSA-1483206.2		97	0.398665	1.48977	0.00840336	0.240946	1	4368	tags=43%, list=27%, signal=59%
PID_UPA_UPAR_PATHWAY%MSIGDB_C2%PID_UPA_UPAR_PATHWAY	PID_UPA_UPAR_PATHWAY%MSIGDB_C2%PID_UPA_UPAR_PATHWAY		35	0.478921	1.48713	0.0374415	0.243944	1	3167	tags=40%, list=20%, signal=50%
INWARDLY RECTIFYING K+ CHANNELS%REACTOME DATABASE ID RELEASE 57%1296065	INWARDLY RECTIFYING K+ CHANNELS%REACTOME DATABASE ID RELEASE 57%1296065		29	0.491768	1.48509	0.0350318	0.245698	1	2968	tags=38%, list=19%, signal=46%
HALLMARK_INTERFERON_GAMMA_RESPONSE%MSIGDB_C2%HALLMARK_INTERFERON_GAMMA_RESPONSE	HALLMARK_INTERFERON_GAMMA_RESPONSE%MSIGDB_C2%HALLMARK_INTERFERON_GAMMA_RESPONSE		166	0.36977	1.47918	0.00139276	0.254816	1	3293	tags=34%, list=21%, signal=42%
PID_GLYPICAN_1PATHWAY%MSIGDB_C2%PID_GLYPICAN_1PATHWAY	PID_GLYPICAN_1PATHWAY%MSIGDB_C2%PID_GLYPICAN_1PATHWAY		25	0.519286	1.47536	0.0328152	0.260129	1	3651	tags=44%, list=23%, signal=57%
PID_A6B1_A6B4_INTEGRIN_PATHWAY%MSIGDB_C2%PID_A6B1_A6B4_INTEGRIN_PATHWAY	PID_A6B1_A6B4_INTEGRIN_PATHWAY%MSIGDB_C2%PID_A6B1_A6B4_INTEGRIN_PATHWAY		44	0.44957	1.47482	0.0226537	0.258956	1	3117	tags=34%, list=19%, signal=42%
RHOA SIGNALING PATHWAY%PATHWAY INTERACTION DATABASE NCI-NATURE CURATED DATA%RHOA SIGNALING PATHWAY	RHOA SIGNALING PATHWAY%PATHWAY INTERACTION DATABASE NCI-NATURE CURATED DATA%RHOA SIGNALING PATHWAY		40	0.45963	1.47424	0.046252	0.257949	1	4186	tags=48%, list=26%, signal=64%
HETEROTRIMERIC G-PROTEIN SIGNALING PATHWAY-ROD OUTER SEGMENT PHOTOTRANSDUCTION%PANTHER PATHWAY%P00028	HETEROTRIMERIC G-PROTEIN SIGNALING PATHWAY-ROD OUTER SEGMENT PHOTOTRANSDUCTION%PANTHER PATHWAY%P00028		29	0.492854	1.47233	0.0587276	0.259465	1	458	tags=14%, list=3%, signal=14%
LPA4-MEDIATED SIGNALING EVENTS%PATHWAY INTERACTION DATABASE NCI-NATURE CURATED DATA%LPA4-MEDIATED SIGNALING EVENTS	LPA4-MEDIATED SIGNALING EVENTS%PATHWAY INTERACTION DATABASE NCI-NATURE CURATED DATA%LPA4-MEDIATED SIGNALING EVENTS		15	0.573952	1.47228	0.0445545	0.257315	1	3910	tags=53%, list=24%, signal=70%
NEUROTRANSMITTER RECEPTOR BINDING AND DOWNSTREAM TRANSMISSION IN THE POSTSYNAPTIC CELL%REACTOME DATABASE ID RELEASE 57%112314	NEUROTRANSMITTER RECEPTOR BINDING AND DOWNSTREAM TRANSMISSION IN THE POSTSYNAPTIC CELL%REACTOME DATABASE ID RELEASE 57%112314		130	0.381658	1.4717	0.0055325	0.256088	1	3687	tags=38%, list=23%, signal=49%
PID_ARF6_PATHWAY%MSIGDB_C2%PID_ARF6_PATHWAY	PID_ARF6_PATHWAY%MSIGDB_C2%PID_ARF6_PATHWAY		30	0.486448	1.46687	0.0426929	0.263343	1	3177	tags=40%, list=20%, signal=50%
PID_AVB3_OPN_PATHWAY%MSIGDB_C2%PID_AVB3_OPN_PATHWAY	PID_AVB3_OPN_PATHWAY%MSIGDB_C2%PID_AVB3_OPN_PATHWAY		27	0.488955	1.46578	0.046281	0.263416	1	2338	tags=33%, list=15%, signal=39%
PID_S1P_S1P1_PATHWAY%MSIGDB_C2%PID_S1P_S1P1_PATHWAY	PID_S1P_S1P1_PATHWAY%MSIGDB_C2%PID_S1P_S1P1_PATHWAY		19	0.529726	1.46505	0.0617696	0.262769	1	2982	tags=42%, list=19%, signal=52%
PLATELET HOMEOSTASIS%REACTOME DATABASE ID RELEASE 57%418346	PLATELET HOMEOSTASIS%REACTOME DATABASE ID RELEASE 57%418346		78	0.411871	1.46296	0.0281481	0.264496	1	2420	tags=28%, list=15%, signal=33%
BMAL1:CLOCK,NPAS2 ACTIVATES CIRCADIAN GENE EXPRESSION%REACTOME DATABASE ID RELEASE 57%1368108	BMAL1:CLOCK,NPAS2 ACTIVATES CIRCADIAN GENE EXPRESSION%REACTOME DATABASE ID RELEASE 57%1368108		38	0.456054	1.4626	0.0418006	0.262842	1	2535	tags=37%, list=16%, signal=44%
YAP1- AND WWTR1 (TAZ)-STIMULATED GENE EXPRESSION%REACTOME DATABASE ID RELEASE 57%2032785	YAP1- AND WWTR1 (TAZ)-STIMULATED GENE EXPRESSION%REACTOME DATABASE ID RELEASE 57%2032785		27	0.494609	1.46066	0.0482529	0.264392	1	4171	tags=48%, list=26%, signal=65%
A TETRASACCHARIDE LINKER SEQUENCE IS REQUIRED FOR GAG SYNTHESIS%REACTOME DATABASE ID RELEASE 57%1971475	A TETRASACCHARIDE LINKER SEQUENCE IS REQUIRED FOR GAG SYNTHESIS%REACTOME DATABASE ID RELEASE 57%1971475		25	0.498992	1.45791	0.0552764	0.267969	1	3822	tags=60%, list=24%, signal=79%
PID_LPA4_PATHWAY%MSIGDB_C2%PID_LPA4_PATHWAY	PID_LPA4_PATHWAY%MSIGDB_C2%PID_LPA4_PATHWAY		15	0.573952	1.45707	0.0646853	0.267552	1	3910	tags=53%, list=24%, signal=70%
PID_RHOA_PATHWAY%MSIGDB_C2%PID_RHOA_PATHWAY	PID_RHOA_PATHWAY%MSIGDB_C2%PID_RHOA_PATHWAY		40	0.45963	1.45365	0.0399361	0.272533	1	4186	tags=48%, list=26%, signal=64%
VASOPRESSIN REGULATES RENAL WATER HOMEOSTASIS VIA AQUAPORINS%REACTOME%R-HSA-432040.1	VASOPRESSIN REGULATES RENAL WATER HOMEOSTASIS VIA AQUAPORINS%REACTOME%R-HSA-432040.1		39	0.45982	1.45234	0.0379747	0.273103	1	2448	tags=31%, list=15%, signal=36%
HALLMARK_APICAL_JUNCTION%MSIGDB_C2%HALLMARK_APICAL_JUNCTION	HALLMARK_APICAL_JUNCTION%MSIGDB_C2%HALLMARK_APICAL_JUNCTION		188	0.355735	1.4518	0.00134048	0.272221	1	4049	tags=32%, list=25%, signal=43%
SHC1 EVENTS IN ERBB2 SIGNALING%REACTOME DATABASE ID RELEASE 57%1250196	SHC1 EVENTS IN ERBB2 SIGNALING%REACTOME DATABASE ID RELEASE 57%1250196		16	0.545636	1.44888	0.0705882	0.275954	1	1881	tags=38%, list=12%, signal=42%
HALLMARK_IL6_JAK_STAT3_SIGNALING%MSIGDB_C2%HALLMARK_IL6_JAK_STAT3_SIGNALING	HALLMARK_IL6_JAK_STAT3_SIGNALING%MSIGDB_C2%HALLMARK_IL6_JAK_STAT3_SIGNALING		77	0.406889	1.44507	0.0175182	0.281629	1	3611	tags=38%, list=23%, signal=48%
PID_EPO_PATHWAY%MSIGDB_C2%PID_EPO_PATHWAY	PID_EPO_PATHWAY%MSIGDB_C2%PID_EPO_PATHWAY		34	0.472533	1.44161	0.0393443	0.286655	1	3117	tags=35%, list=19%, signal=44%
OSTEOPONTIN-MEDIATED EVENTS%PATHWAY INTERACTION DATABASE NCI-NATURE CURATED DATA%OSTEOPONTIN-MEDIATED EVENTS	OSTEOPONTIN-MEDIATED EVENTS%PATHWAY INTERACTION DATABASE NCI-NATURE CURATED DATA%OSTEOPONTIN-MEDIATED EVENTS		27	0.488955	1.44073	0.0551053	0.286365	1	2338	tags=33%, list=15%, signal=39%
PID_IL6_7_PATHWAY%MSIGDB_C2%PID_IL6_7_PATHWAY	PID_IL6_7_PATHWAY%MSIGDB_C2%PID_IL6_7_PATHWAY		46	0.439225	1.43999	0.0452418	0.285825	1	2678	tags=37%, list=17%, signal=44%
ST_GA12_PATHWAY%MSIGDB_C2%ST_GA12_PATHWAY	ST_GA12_PATHWAY%MSIGDB_C2%ST_GA12_PATHWAY		21	0.514664	1.43758	0.0709459	0.288429	1	5117	tags=52%, list=32%, signal=77%
EPO SIGNALING PATHWAY%PATHWAY INTERACTION DATABASE NCI-NATURE CURATED DATA%EPO SIGNALING PATHWAY	EPO SIGNALING PATHWAY%PATHWAY INTERACTION DATABASE NCI-NATURE CURATED DATA%EPO SIGNALING PATHWAY		32	0.469478	1.4367	0.0567823	0.288182	1	3117	tags=34%, list=19%, signal=43%
NUCLEAR SIGNALING BY ERBB4%REACTOME DATABASE ID RELEASE 57%1251985	NUCLEAR SIGNALING BY ERBB4%REACTOME DATABASE ID RELEASE 57%1251985		30	0.47898	1.43225	0.0497512	0.295944	1	3785	tags=40%, list=24%, signal=52%
G ALPHA (Z) SIGNALLING EVENTS%REACTOME%R-HSA-418597.2	G ALPHA (Z) SIGNALLING EVENTS%REACTOME%R-HSA-418597.2		45	0.442276	1.43216	0.0323575	0.294012	1	2448	tags=33%, list=15%, signal=39%
ST_WNT_CA2_CYCLIC_GMP_PATHWAY%MSIGDB_C2%ST_WNT_CA2_CYCLIC_GMP_PATHWAY	ST_WNT_CA2_CYCLIC_GMP_PATHWAY%MSIGDB_C2%ST_WNT_CA2_CYCLIC_GMP_PATHWAY		18	0.54492	1.43063	0.0722892	0.295332	1	4048	tags=61%, list=25%, signal=82%
IL6-MEDIATED SIGNALING EVENTS%PATHWAY INTERACTION DATABASE NCI-NATURE CURATED DATA%IL6-MEDIATED SIGNALING EVENTS	IL6-MEDIATED SIGNALING EVENTS%PATHWAY INTERACTION DATABASE NCI-NATURE CURATED DATA%IL6-MEDIATED SIGNALING EVENTS		46	0.439225	1.42909	0.0390244	0.296425	1	2678	tags=37%, list=17%, signal=44%
PLATELET ACTIVATION, SIGNALING AND AGGREGATION%REACTOME DATABASE ID RELEASE 57%76002	PLATELET ACTIVATION, SIGNALING AND AGGREGATION%REACTOME DATABASE ID RELEASE 57%76002		245	0.339771	1.42883	0.0100125	0.294788	1	2484	tags=22%, list=15%, signal=25%
ARF6 SIGNALING EVENTS%PATHWAY INTERACTION DATABASE NCI-NATURE CURATED DATA%ARF6 SIGNALING EVENTS	ARF6 SIGNALING EVENTS%PATHWAY INTERACTION DATABASE NCI-NATURE CURATED DATA%ARF6 SIGNALING EVENTS		30	0.486448	1.42819	0.0564516	0.29391	1	3177	tags=40%, list=20%, signal=50%
A6B1 AND A6B4 INTEGRIN SIGNALING%PATHWAY INTERACTION DATABASE NCI-NATURE CURATED DATA%A6B1 AND A6B4 INTEGRIN SIGNALING	A6B1 AND A6B4 INTEGRIN SIGNALING%PATHWAY INTERACTION DATABASE NCI-NATURE CURATED DATA%A6B1 AND A6B4 INTEGRIN SIGNALING		43	0.449653	1.42726	0.0404355	0.293684	1	3117	tags=35%, list=19%, signal=43%
PID_SYNDECAN_4_PATHWAY%MSIGDB_C2%PID_SYNDECAN_4_PATHWAY	PID_SYNDECAN_4_PATHWAY%MSIGDB_C2%PID_SYNDECAN_4_PATHWAY		30	0.466729	1.42082	0.0562701	0.305714	1	2684	tags=33%, list=17%, signal=40%
NEGATIVE REGULATION OF THE PI3K AKT NETWORK%REACTOME DATABASE ID RELEASE 57%199418	NEGATIVE REGULATION OF THE PI3K AKT NETWORK%REACTOME DATABASE ID RELEASE 57%199418		73	0.400551	1.41897	0.0451237	0.307683	1	2246	tags=26%, list=14%, signal=30%
SYNDECAN-4-MEDIATED SIGNALING EVENTS%PATHWAY INTERACTION DATABASE NCI-NATURE CURATED DATA%SYNDECAN-4-MEDIATED SIGNALING EVENTS	SYNDECAN-4-MEDIATED SIGNALING EVENTS%PATHWAY INTERACTION DATABASE NCI-NATURE CURATED DATA%SYNDECAN-4-MEDIATED SIGNALING EVENTS		30	0.466729	1.41638	0.0516963	0.311155	1	2684	tags=33%, list=17%, signal=40%
NABA_PROTEOGLYCANS%MSIGDB_C2%NABA_PROTEOGLYCANS	NABA_PROTEOGLYCANS%MSIGDB_C2%NABA_PROTEOGLYCANS		33	0.468048	1.41467	0.0374593	0.312768	1	5581	tags=58%, list=35%, signal=88%
HALLMARK_IL2_STAT5_SIGNALING%MSIGDB_C2%HALLMARK_IL2_STAT5_SIGNALING	HALLMARK_IL2_STAT5_SIGNALING%MSIGDB_C2%HALLMARK_IL2_STAT5_SIGNALING		185	0.348195	1.41069	0.00957592	0.319376	1	2472	tags=23%, list=15%, signal=27%
HALLMARK_COAGULATION%MSIGDB_C2%HALLMARK_COAGULATION	HALLMARK_COAGULATION%MSIGDB_C2%HALLMARK_COAGULATION		124	0.365282	1.40798	0.0159884	0.323204	1	3428	tags=31%, list=21%, signal=40%
ALZHEIMER DISEASE-PRESENILIN PATHWAY%PANTHER PATHWAY%P00004	ALZHEIMER DISEASE-PRESENILIN PATHWAY%PANTHER PATHWAY%P00004		104	0.37655	1.40701	0.0257511	0.323075	1	4075	tags=41%, list=25%, signal=55%
GLUCAGON SIGNALING IN METABOLIC REGULATION%REACTOME DATABASE ID RELEASE 57%163359	GLUCAGON SIGNALING IN METABOLIC REGULATION%REACTOME DATABASE ID RELEASE 57%163359		30	0.468685	1.4066	0.0650794	0.321848	1	2448	tags=33%, list=15%, signal=39%
HALLMARK_COMPLEMENT%MSIGDB_C2%HALLMARK_COMPLEMENT	HALLMARK_COMPLEMENT%MSIGDB_C2%HALLMARK_COMPLEMENT		168	0.351075	1.40257	0.00271003	0.329027	1	3583	tags=31%, list=22%, signal=39%
ALPHA6BETA4INTEGRIN%IOB%ALPHA6BETA4INTEGRIN	ALPHA6BETA4INTEGRIN%IOB%ALPHA6BETA4INTEGRIN		63	0.402959	1.4014	0.0295858	0.329518	1	3167	tags=33%, list=20%, signal=41%
CARDIAC CONDUCTION%REACTOME%R-HSA-5576891.1	CARDIAC CONDUCTION%REACTOME%R-HSA-5576891.1		122	0.362085	1.39697	0.0196353	0.337895	1	4213	tags=39%, list=26%, signal=53%
TRANSMISSION ACROSS CHEMICAL SYNAPSES%REACTOME%R-HSA-112315.2	TRANSMISSION ACROSS CHEMICAL SYNAPSES%REACTOME%R-HSA-112315.2		190	0.343483	1.39575	0.00683995	0.33852	1	3687	tags=34%, list=23%, signal=43%
NUCLEAR RECEPTOR TRANSCRIPTION PATHWAY%REACTOME DATABASE ID RELEASE 57%383280	NUCLEAR RECEPTOR TRANSCRIPTION PATHWAY%REACTOME DATABASE ID RELEASE 57%383280		39	0.441486	1.39455	0.0464744	0.339076	1	2654	tags=33%, list=17%, signal=40%
AMINE LIGAND-BINDING RECEPTORS%REACTOME DATABASE ID RELEASE 57%375280	AMINE LIGAND-BINDING RECEPTORS%REACTOME DATABASE ID RELEASE 57%375280		40	0.432006	1.39325	0.0584416	0.340053	1	5163	tags=40%, list=32%, signal=59%
PKA ACTIVATION%REACTOME DATABASE ID RELEASE 57%163615	PKA ACTIVATION%REACTOME DATABASE ID RELEASE 57%163615		15	0.535207	1.39224	0.108156	0.340349	1	3910	tags=53%, list=24%, signal=70%
PKA ACTIVATION IN GLUCAGON SIGNALLING%REACTOME%R-HSA-164378.1	PKA ACTIVATION IN GLUCAGON SIGNALLING%REACTOME%R-HSA-164378.1		15	0.535207	1.39187	0.0919732	0.339093	1	3910	tags=53%, list=24%, signal=70%
BIOCARTA_SPRY_PATHWAY%MSIGDB_C2%BIOCARTA_SPRY_PATHWAY	BIOCARTA_SPRY_PATHWAY%MSIGDB_C2%BIOCARTA_SPRY_PATHWAY		17	0.532925	1.39124	0.0859107	0.33847	1	3167	tags=41%, list=20%, signal=51%
GPCR LIGAND BINDING%REACTOME%R-HSA-500792.2	GPCR LIGAND BINDING%REACTOME%R-HSA-500792.2		372	0.321399	1.39037	0.00243309	0.338478	1	4197	tags=29%, list=26%, signal=38%
ERBB1 DOWNSTREAM SIGNALING%PATHWAY INTERACTION DATABASE NCI-NATURE CURATED DATA%ERBB1 DOWNSTREAM SIGNALING	ERBB1 DOWNSTREAM SIGNALING%PATHWAY INTERACTION DATABASE NCI-NATURE CURATED DATA%ERBB1 DOWNSTREAM SIGNALING		93	0.371665	1.38855	0.0358166	0.340997	1	3167	tags=28%, list=20%, signal=35%
IL27-MEDIATED SIGNALING EVENTS%PATHWAY INTERACTION DATABASE NCI-NATURE CURATED DATA%IL27-MEDIATED SIGNALING EVENTS	IL27-MEDIATED SIGNALING EVENTS%PATHWAY INTERACTION DATABASE NCI-NATURE CURATED DATA%IL27-MEDIATED SIGNALING EVENTS		26	0.475972	1.38773	0.086262	0.340624	1	2534	tags=35%, list=16%, signal=41%
BIOCARTA_EGF_PATHWAY%MSIGDB_C2%BIOCARTA_EGF_PATHWAY	BIOCARTA_EGF_PATHWAY%MSIGDB_C2%BIOCARTA_EGF_PATHWAY		30	0.460314	1.38724	0.0612903	0.339797	1	2462	tags=30%, list=15%, signal=35%
INHIBITION OF VOLTAGE GATED CA2+ CHANNELS VIA GBETA GAMMA SUBUNITS%REACTOME DATABASE ID RELEASE 57%997272	INHIBITION OF VOLTAGE GATED CA2+ CHANNELS VIA GBETA GAMMA SUBUNITS%REACTOME DATABASE ID RELEASE 57%997272		23	0.488031	1.38658	0.0964467	0.339224	1	2250	tags=35%, list=14%, signal=40%
BIOCARTA_FAS_PATHWAY%MSIGDB_C2%BIOCARTA_FAS_PATHWAY	BIOCARTA_FAS_PATHWAY%MSIGDB_C2%BIOCARTA_FAS_PATHWAY		29	0.463352	1.38631	0.0665584	0.337699	1	3115	tags=38%, list=19%, signal=47%
PID_AP1_PATHWAY%MSIGDB_C2%PID_AP1_PATHWAY	PID_AP1_PATHWAY%MSIGDB_C2%PID_AP1_PATHWAY		64	0.401297	1.38466	0.0555556	0.339841	1	1983	tags=23%, list=12%, signal=27%
IL9%NETPATH%IL9	IL9%NETPATH%IL9		22	0.496078	1.38358	0.088	0.340287	1	3117	tags=32%, list=19%, signal=39%
HETEROTRIMERIC G-PROTEIN SIGNALING PATHWAY-GI ALPHA AND GS ALPHA MEDIATED PATHWAY%PANTHER PATHWAY%P00026	HETEROTRIMERIC G-PROTEIN SIGNALING PATHWAY-GI ALPHA AND GS ALPHA MEDIATED PATHWAY%PANTHER PATHWAY%P00026		139	0.353722	1.38103	0.0290055	0.344286	1	4068	tags=33%, list=25%, signal=44%
G PROTEIN GATED POTASSIUM CHANNELS%REACTOME DATABASE ID RELEASE 57%1296059	G PROTEIN GATED POTASSIUM CHANNELS%REACTOME DATABASE ID RELEASE 57%1296059		23	0.488031	1.37806	0.104027	0.349278	1	2250	tags=35%, list=14%, signal=40%
PHOSPHOLIPASE C-MEDIATED CASCADE; FGFR3%REACTOME DATABASE ID RELEASE 57%5654227	PHOSPHOLIPASE C-MEDIATED CASCADE; FGFR3%REACTOME DATABASE ID RELEASE 57%5654227		38	0.434089	1.37629	0.066358	0.351602	1	3910	tags=45%, list=24%, signal=59%
AP-1 TRANSCRIPTION FACTOR NETWORK%PATHWAY INTERACTION DATABASE NCI-NATURE CURATED DATA%AP-1 TRANSCRIPTION FACTOR NETWORK	AP-1 TRANSCRIPTION FACTOR NETWORK%PATHWAY INTERACTION DATABASE NCI-NATURE CURATED DATA%AP-1 TRANSCRIPTION FACTOR NETWORK		64	0.401298	1.3761	0.0540541	0.349954	1	1983	tags=23%, list=12%, signal=27%
PID_IL27_PATHWAY%MSIGDB_C2%PID_IL27_PATHWAY	PID_IL27_PATHWAY%MSIGDB_C2%PID_IL27_PATHWAY		26	0.475972	1.37512	0.0756579	0.35016	1	2534	tags=35%, list=16%, signal=41%
HALLMARK_HYPOXIA%MSIGDB_C2%HALLMARK_HYPOXIA	HALLMARK_HYPOXIA%MSIGDB_C2%HALLMARK_HYPOXIA		183	0.339868	1.37478	0.0194715	0.348922	1	3049	tags=31%, list=19%, signal=37%
ERBB2 ERBB3 SIGNALING EVENTS%PATHWAY INTERACTION DATABASE NCI-NATURE CURATED DATA%ERBB2 ERBB3 SIGNALING EVENTS	ERBB2 ERBB3 SIGNALING EVENTS%PATHWAY INTERACTION DATABASE NCI-NATURE CURATED DATA%ERBB2 ERBB3 SIGNALING EVENTS		39	0.43204	1.37372	0.0646688	0.349267	1	3351	tags=38%, list=21%, signal=49%
PHOSPHOLIPASE C-MEDIATED CASCADE: FGFR1%REACTOME DATABASE ID RELEASE 57%5654219	PHOSPHOLIPASE C-MEDIATED CASCADE: FGFR1%REACTOME DATABASE ID RELEASE 57%5654219		40	0.432423	1.37275	0.0532446	0.349405	1	3910	tags=43%, list=24%, signal=56%
S1P1 PATHWAY%PATHWAY INTERACTION DATABASE NCI-NATURE CURATED DATA%S1P1 PATHWAY	S1P1 PATHWAY%PATHWAY INTERACTION DATABASE NCI-NATURE CURATED DATA%S1P1 PATHWAY		18	0.509439	1.37142	0.0992908	0.350493	1	2982	tags=39%, list=19%, signal=48%
BETA2 ADRENERGIC RECEPTOR SIGNALING PATHWAY%PANTHER PATHWAY%P04378	BETA2 ADRENERGIC RECEPTOR SIGNALING PATHWAY%PANTHER PATHWAY%P04378		22	0.487404	1.36902	0.0857143	0.354194	1	1382	tags=23%, list=9%, signal=25%
ADRENALINE,NORADRENALINE INHIBITS INSULIN SECRETION%REACTOME DATABASE ID RELEASE 57%400042	ADRENALINE,NORADRENALINE INHIBITS INSULIN SECRETION%REACTOME DATABASE ID RELEASE 57%400042		27	0.462638	1.36815	0.0794165	0.35422	1	1382	tags=22%, list=9%, signal=24%
KERATAN SULFATE BIOSYNTHESIS%REACTOME%R-HSA-2022854.1	KERATAN SULFATE BIOSYNTHESIS%REACTOME%R-HSA-2022854.1		24	0.476918	1.36679	0.0854701	0.355452	1	4722	tags=50%, list=29%, signal=71%
COMPLEMENT CASCADE%REACTOME DATABASE ID RELEASE 57%166658	COMPLEMENT CASCADE%REACTOME DATABASE ID RELEASE 57%166658		26	0.471155	1.36539	0.0915493	0.356968	1	668	tags=15%, list=4%, signal=16%
CLASS C 3 (METABOTROPIC GLUTAMATE PHEROMONE RECEPTORS)%REACTOME%R-HSA-420499.1	CLASS C 3 (METABOTROPIC GLUTAMATE PHEROMONE RECEPTORS)%REACTOME%R-HSA-420499.1		24	0.476746	1.36527	0.0927152	0.355227	1	2919	tags=21%, list=18%, signal=25%
PHOSPHOLIPASE C-MEDIATED CASCADE; FGFR2%REACTOME%R-HSA-5654221.1	PHOSPHOLIPASE C-MEDIATED CASCADE; FGFR2%REACTOME%R-HSA-5654221.1		43	0.417508	1.36436	0.0766667	0.355479	1	3910	tags=40%, list=24%, signal=52%
CELL-EXTRACELLULAR MATRIX INTERACTIONS%REACTOME%R-HSA-446353.1	CELL-EXTRACELLULAR MATRIX INTERACTIONS%REACTOME%R-HSA-446353.1		15	0.535648	1.36097	0.116667	0.361612	1	2187	tags=27%, list=14%, signal=31%
ACTIVATION OF G PROTEIN GATED POTASSIUM CHANNELS%REACTOME%R-HSA-1296041.1	ACTIVATION OF G PROTEIN GATED POTASSIUM CHANNELS%REACTOME%R-HSA-1296041.1		23	0.488031	1.36083	0.105802	0.360002	1	2250	tags=35%, list=14%, signal=40%
BLOOD COAGULATION%PANTHER PATHWAY%P00011	BLOOD COAGULATION%PANTHER PATHWAY%P00011		34	0.440325	1.35976	0.0818331	0.36052	1	4214	tags=35%, list=26%, signal=48%
PID_ERBB1_DOWNSTREAM_PATHWAY%MSIGDB_C2%PID_ERBB1_DOWNSTREAM_PATHWAY	PID_ERBB1_DOWNSTREAM_PATHWAY%MSIGDB_C2%PID_ERBB1_DOWNSTREAM_PATHWAY		95	0.366764	1.35647	0.0368189	0.366282	1	3167	tags=28%, list=20%, signal=35%
ANTIGEN ACTIVATES B CELL RECEPTOR (BCR) LEADING TO GENERATION OF SECOND MESSENGERS%REACTOME%R-HSA-983695.1	ANTIGEN ACTIVATES B CELL RECEPTOR (BCR) LEADING TO GENERATION OF SECOND MESSENGERS%REACTOME%R-HSA-983695.1		32	0.438699	1.3546	0.0995261	0.368972	1	3410	tags=31%, list=21%, signal=40%
CELL-CELL COMMUNICATION%REACTOME DATABASE ID RELEASE 57%1500931	CELL-CELL COMMUNICATION%REACTOME DATABASE ID RELEASE 57%1500931		111	0.353179	1.34921	0.0355619	0.380192	1	4049	tags=32%, list=25%, signal=43%
PID_LYSOPHOSPHOLIPID_PATHWAY%MSIGDB_C2%PID_LYSOPHOSPHOLIPID_PATHWAY	PID_LYSOPHOSPHOLIPID_PATHWAY%MSIGDB_C2%PID_LYSOPHOSPHOLIPID_PATHWAY		63	0.383505	1.34875	0.0639269	0.379466	1	2448	tags=30%, list=15%, signal=35%
ST_ADRENERGIC%MSIGDB_C2%ST_ADRENERGIC	ST_ADRENERGIC%MSIGDB_C2%ST_ADRENERGIC		33	0.433895	1.34276	0.0897227	0.392421	1	3507	tags=42%, list=22%, signal=54%
PHOSPHOLIPASE C-MEDIATED CASCADE; FGFR4%REACTOME DATABASE ID RELEASE 57%5654228	PHOSPHOLIPASE C-MEDIATED CASCADE; FGFR4%REACTOME DATABASE ID RELEASE 57%5654228		42	0.414839	1.33927	0.104235	0.399177	1	3630	tags=40%, list=23%, signal=52%
SIGNALING BY BMP%REACTOME DATABASE ID RELEASE 57%201451	SIGNALING BY BMP%REACTOME DATABASE ID RELEASE 57%201451		22	0.47666	1.33874	0.102649	0.398404	1	4170	tags=41%, list=26%, signal=55%
SIGNALING BY PDGF%REACTOME DATABASE ID RELEASE 57%186797	SIGNALING BY PDGF%REACTOME DATABASE ID RELEASE 57%186797		313	0.313865	1.33803	0.0113208	0.39835	1	2318	tags=22%, list=14%, signal=25%
ENKEPHALIN RELEASE%PANTHER PATHWAY%P05913	ENKEPHALIN RELEASE%PANTHER PATHWAY%P05913		30	0.443432	1.33495	0.110569	0.404257	1	458	tags=13%, list=3%, signal=14%
INTERFERON ALPHA BETA SIGNALING%REACTOME%R-HSA-909733.1	INTERFERON ALPHA BETA SIGNALING%REACTOME%R-HSA-909733.1		35	0.428706	1.33487	0.117834	0.402375	1	2678	tags=31%, list=17%, signal=38%
BIOCARTA_HER2_PATHWAY%MSIGDB_C2%BIOCARTA_HER2_PATHWAY	BIOCARTA_HER2_PATHWAY%MSIGDB_C2%BIOCARTA_HER2_PATHWAY		22	0.487294	1.33392	0.132773	0.402636	1	3117	tags=32%, list=19%, signal=39%
NEGATIVE REGULATORS OF RIG-I MDA5 SIGNALING%REACTOME DATABASE ID RELEASE 57%936440	NEGATIVE REGULATORS OF RIG-I MDA5 SIGNALING%REACTOME DATABASE ID RELEASE 57%936440		23	0.469688	1.33352	0.123177	0.401553	1	3128	tags=39%, list=20%, signal=49%
ENDOTHELINS%PATHWAY INTERACTION DATABASE NCI-NATURE CURATED DATA%ENDOTHELINS	ENDOTHELINS%PATHWAY INTERACTION DATABASE NCI-NATURE CURATED DATA%ENDOTHELINS		59	0.383447	1.33145	0.0724191	0.404911	1	3659	tags=42%, list=23%, signal=55%
PID_ERBB2_ERBB3_PATHWAY%MSIGDB_C2%PID_ERBB2_ERBB3_PATHWAY	PID_ERBB2_ERBB3_PATHWAY%MSIGDB_C2%PID_ERBB2_ERBB3_PATHWAY		41	0.416693	1.33121	0.088	0.40353	1	3351	tags=39%, list=21%, signal=49%
LPA RECEPTOR MEDIATED EVENTS%PATHWAY INTERACTION DATABASE NCI-NATURE CURATED DATA%LPA RECEPTOR MEDIATED EVENTS	LPA RECEPTOR MEDIATED EVENTS%PATHWAY INTERACTION DATABASE NCI-NATURE CURATED DATA%LPA RECEPTOR MEDIATED EVENTS		61	0.382583	1.33115	0.0704441	0.40166	1	1238	tags=23%, list=8%, signal=25%
METABOTROPIC GLUTAMATE RECEPTOR GROUP III PATHWAY%PANTHER PATHWAY%P00039	METABOTROPIC GLUTAMATE RECEPTOR GROUP III PATHWAY%PANTHER PATHWAY%P00039		59	0.386663	1.32698	0.0835913	0.410209	1	2982	tags=27%, list=19%, signal=33%
ANGIOTENSIN_II-STIMULATED_SIGNALING_THROUGH_G_PROTEINS_AND_BETA-ARRESTIN%PANTHER PATHWAY%P05911	ANGIOTENSIN_II-STIMULATED_SIGNALING_THROUGH_G_PROTEINS_AND_BETA-ARRESTIN%PANTHER PATHWAY%P05911		33	0.429335	1.32503	0.0958678	0.413489	1	3472	tags=39%, list=22%, signal=50%
EPHA2 FORWARD SIGNALING%PATHWAY INTERACTION DATABASE NCI-NATURE CURATED DATA%EPHA2 FORWARD SIGNALING	EPHA2 FORWARD SIGNALING%PATHWAY INTERACTION DATABASE NCI-NATURE CURATED DATA%EPHA2 FORWARD SIGNALING		18	0.493621	1.32495	0.119718	0.411648	1	3167	tags=39%, list=20%, signal=48%
BIOCARTA_IL6_PATHWAY%MSIGDB_C2%BIOCARTA_IL6_PATHWAY	BIOCARTA_IL6_PATHWAY%MSIGDB_C2%BIOCARTA_IL6_PATHWAY		21	0.474832	1.3233	0.123355	0.414006	1	3117	tags=38%, list=19%, signal=47%
PKA-MEDIATED PHOSPHORYLATION OF CREB%REACTOME DATABASE ID RELEASE 57%111931	PKA-MEDIATED PHOSPHORYLATION OF CREB%REACTOME DATABASE ID RELEASE 57%111931		16	0.511676	1.32186	0.131363	0.415905	1	3910	tags=50%, list=24%, signal=66%
HEMOSTASIS%REACTOME DATABASE ID RELEASE 57%109582	HEMOSTASIS%REACTOME DATABASE ID RELEASE 57%109582		496	0.298631	1.32031	0.0106509	0.417695	1	3793	tags=28%, list=24%, signal=36%
EPO%IOB%EPO	EPO%IOB%EPO		48	0.398837	1.32022	0.0728083	0.415891	1	2692	tags=31%, list=17%, signal=37%
MYD88:MAL CASCADE INITIATED ON PLASMA MEMBRANE%REACTOME%R-HSA-166058.1	MYD88:MAL CASCADE INITIATED ON PLASMA MEMBRANE%REACTOME%R-HSA-166058.1		82	0.360575	1.31896	0.0664653	0.417238	1	1768	tags=22%, list=11%, signal=25%
ST_GRANULE_CELL_SURVIVAL_PATHWAY%MSIGDB_C2%ST_GRANULE_CELL_SURVIVAL_PATHWAY	ST_GRANULE_CELL_SURVIVAL_PATHWAY%MSIGDB_C2%ST_GRANULE_CELL_SURVIVAL_PATHWAY		24	0.462608	1.31836	0.128501	0.416869	1	3608	tags=42%, list=23%, signal=54%
IL6%NETPATH%IL6	IL6%NETPATH%IL6		79	0.367326	1.31816	0.0716418	0.41532	1	2534	tags=28%, list=16%, signal=33%
IFN-ALPHA%IOB%IFN-ALPHA	IFN-ALPHA%IOB%IFN-ALPHA		32	0.431349	1.31791	0.0953895	0.413951	1	2534	tags=34%, list=16%, signal=41%
PID_EPHA2_FWD_PATHWAY%MSIGDB_C2%PID_EPHA2_FWD_PATHWAY	PID_EPHA2_FWD_PATHWAY%MSIGDB_C2%PID_EPHA2_FWD_PATHWAY		18	0.493621	1.31706	0.131886	0.414105	1	3167	tags=39%, list=20%, signal=48%
PID_ENDOTHELIN_PATHWAY%MSIGDB_C2%PID_ENDOTHELIN_PATHWAY	PID_ENDOTHELIN_PATHWAY%MSIGDB_C2%PID_ENDOTHELIN_PATHWAY		59	0.383447	1.31668	0.0652174	0.413202	1	3659	tags=42%, list=23%, signal=55%
BIOCARTA_MCALPAIN_PATHWAY%MSIGDB_C2%BIOCARTA_MCALPAIN_PATHWAY	BIOCARTA_MCALPAIN_PATHWAY%MSIGDB_C2%BIOCARTA_MCALPAIN_PATHWAY		24	0.456239	1.31635	0.117241	0.412119	1	4049	tags=38%, list=25%, signal=50%
PID_EPHRINB_REV_PATHWAY%MSIGDB_C2%PID_EPHRINB_REV_PATHWAY	PID_EPHRINB_REV_PATHWAY%MSIGDB_C2%PID_EPHRINB_REV_PATHWAY		29	0.444999	1.31489	0.0909091	0.414073	1	4068	tags=41%, list=25%, signal=55%
EPHRIN B REVERSE SIGNALING%PATHWAY INTERACTION DATABASE NCI-NATURE CURATED DATA%EPHRIN B REVERSE SIGNALING	EPHRIN B REVERSE SIGNALING%PATHWAY INTERACTION DATABASE NCI-NATURE CURATED DATA%EPHRIN B REVERSE SIGNALING		25	0.453689	1.3126	0.126476	0.418264	1	3167	tags=36%, list=20%, signal=45%
TOLL LIKE RECEPTOR TLR6:TLR2 CASCADE%REACTOME DATABASE ID RELEASE 57%168188	TOLL LIKE RECEPTOR TLR6:TLR2 CASCADE%REACTOME DATABASE ID RELEASE 57%168188		82	0.360575	1.31128	0.0771558	0.420008	1	1768	tags=22%, list=11%, signal=25%
G ALPHA (S) SIGNALLING EVENTS%REACTOME%R-HSA-418555.3	G ALPHA (S) SIGNALLING EVENTS%REACTOME%R-HSA-418555.3		128	0.336959	1.31022	0.0533516	0.420933	1	4842	tags=38%, list=30%, signal=53%
CLASS A 1 (RHODOPSIN-LIKE RECEPTORS)%REACTOME DATABASE ID RELEASE 57%373076	CLASS A 1 (RHODOPSIN-LIKE RECEPTORS)%REACTOME DATABASE ID RELEASE 57%373076		269	0.311196	1.31016	0.0179028	0.41917	1	5199	tags=38%, list=32%, signal=55%
PID_ATF2_PATHWAY%MSIGDB_C2%PID_ATF2_PATHWAY	PID_ATF2_PATHWAY%MSIGDB_C2%PID_ATF2_PATHWAY		55	0.383489	1.30925	0.0996979	0.419693	1	2041	tags=25%, list=13%, signal=29%
PID_CDC42_REG_PATHWAY%MSIGDB_C2%PID_CDC42_REG_PATHWAY	PID_CDC42_REG_PATHWAY%MSIGDB_C2%PID_CDC42_REG_PATHWAY		26	0.442756	1.30812	0.145215	0.420781	1	3587	tags=42%, list=22%, signal=54%
EGFR INTERACTS WITH PHOSPHOLIPASE C-GAMMA%REACTOME DATABASE ID RELEASE 57%212718	EGFR INTERACTS WITH PHOSPHOLIPASE C-GAMMA%REACTOME DATABASE ID RELEASE 57%212718		32	0.425057	1.30527	0.111643	0.426165	1	3910	tags=47%, list=24%, signal=62%
PDGFR-BETA SIGNALING PATHWAY%PATHWAY INTERACTION DATABASE NCI-NATURE CURATED DATA%PDGFR-BETA SIGNALING PATHWAY	PDGFR-BETA SIGNALING PATHWAY%PATHWAY INTERACTION DATABASE NCI-NATURE CURATED DATA%PDGFR-BETA SIGNALING PATHWAY		117	0.340074	1.3038	0.065407	0.4282	1	2648	tags=26%, list=17%, signal=30%
HALLMARK_KRAS_SIGNALING_UP%MSIGDB_C2%HALLMARK_KRAS_SIGNALING_UP	HALLMARK_KRAS_SIGNALING_UP%MSIGDB_C2%HALLMARK_KRAS_SIGNALING_UP		187	0.317702	1.30232	0.0336474	0.43009	1	3460	tags=29%, list=22%, signal=37%
TOLL LIKE RECEPTOR 2 (TLR2) CASCADE%REACTOME%R-HSA-181438.1	TOLL LIKE RECEPTOR 2 (TLR2) CASCADE%REACTOME%R-HSA-181438.1		82	0.360575	1.29995	0.0789474	0.434475	1	1768	tags=22%, list=11%, signal=25%
TOLL LIKE RECEPTOR TLR1:TLR2 CASCADE%REACTOME DATABASE ID RELEASE 57%168179	TOLL LIKE RECEPTOR TLR1:TLR2 CASCADE%REACTOME DATABASE ID RELEASE 57%168179		82	0.360575	1.29986	0.0823171	0.432761	1	1768	tags=22%, list=11%, signal=25%
RORA ACTIVATES GENE EXPRESSION%REACTOME%R-HSA-1368082.2	RORA ACTIVATES GENE EXPRESSION%REACTOME%R-HSA-1368082.2		25	0.451286	1.2997	0.129032	0.431292	1	2535	tags=36%, list=16%, signal=43%
PI3K EVENTS IN ERBB4 SIGNALING%REACTOME DATABASE ID RELEASE 57%1250342	PI3K EVENTS IN ERBB4 SIGNALING%REACTOME DATABASE ID RELEASE 57%1250342		101	0.343801	1.29945	0.0676259	0.429967	1	2246	tags=23%, list=14%, signal=26%
BIOCARTA_KERATINOCYTE_PATHWAY%MSIGDB_C2%BIOCARTA_KERATINOCYTE_PATHWAY	BIOCARTA_KERATINOCYTE_PATHWAY%MSIGDB_C2%BIOCARTA_KERATINOCYTE_PATHWAY		44	0.400915	1.29733	0.121835	0.433799	1	1906	tags=20%, list=12%, signal=23%
ATF-2 TRANSCRIPTION FACTOR NETWORK%PATHWAY INTERACTION DATABASE NCI-NATURE CURATED DATA%ATF-2 TRANSCRIPTION FACTOR NETWORK	ATF-2 TRANSCRIPTION FACTOR NETWORK%PATHWAY INTERACTION DATABASE NCI-NATURE CURATED DATA%ATF-2 TRANSCRIPTION FACTOR NETWORK		55	0.383489	1.29623	0.0806697	0.434837	1	2041	tags=25%, list=13%, signal=29%
BIOCARTA_BCR_PATHWAY%MSIGDB_C2%BIOCARTA_BCR_PATHWAY	BIOCARTA_BCR_PATHWAY%MSIGDB_C2%BIOCARTA_BCR_PATHWAY		31	0.434809	1.29621	0.123245	0.433015	1	2338	tags=23%, list=15%, signal=26%
ST_G_ALPHA_I_PATHWAY%MSIGDB_C2%ST_G_ALPHA_I_PATHWAY	ST_G_ALPHA_I_PATHWAY%MSIGDB_C2%ST_G_ALPHA_I_PATHWAY		33	0.419955	1.29476	0.118136	0.434921	1	3788	tags=48%, list=24%, signal=63%
CIRCADIAN CLOCK%REACTOME%R-HSA-400253.1	CIRCADIAN CLOCK%REACTOME%R-HSA-400253.1		54	0.383159	1.29347	0.107425	0.436402	1	2535	tags=30%, list=16%, signal=35%
PI-3K CASCADE:FGFR2%REACTOME DATABASE ID RELEASE 57%5654695	PI-3K CASCADE:FGFR2%REACTOME DATABASE ID RELEASE 57%5654695		101	0.343801	1.2927	0.070028	0.436482	1	2246	tags=23%, list=14%, signal=26%
PI3K AKT SIGNALING IN CANCER%REACTOME DATABASE ID RELEASE 57%2219528	PI3K AKT SIGNALING IN CANCER%REACTOME DATABASE ID RELEASE 57%2219528		69	0.364815	1.29047	0.0794603	0.440654	1	2246	tags=23%, list=14%, signal=27%
ANGIOGENESIS%PANTHER PATHWAY%P00005	ANGIOGENESIS%PANTHER PATHWAY%P00005		144	0.329174	1.28975	0.0550206	0.440567	1	3167	tags=28%, list=20%, signal=34%
BIOCARTA_P38MAPK_PATHWAY%MSIGDB_C2%BIOCARTA_P38MAPK_PATHWAY	BIOCARTA_P38MAPK_PATHWAY%MSIGDB_C2%BIOCARTA_P38MAPK_PATHWAY		35	0.421707	1.2894	0.131796	0.439647	1	2338	tags=23%, list=15%, signal=27%
CADHERIN SIGNALING PATHWAY%PANTHER PATHWAY%P00012	CADHERIN SIGNALING PATHWAY%PANTHER PATHWAY%P00012		124	0.331534	1.28827	0.0808511	0.440898	1	2377	tags=24%, list=15%, signal=28%
CLASS B 2 (SECRETIN FAMILY RECEPTORS)%REACTOME DATABASE ID RELEASE 57%373080	CLASS B 2 (SECRETIN FAMILY RECEPTORS)%REACTOME DATABASE ID RELEASE 57%373080		79	0.356172	1.28629	0.092511	0.444204	1	2072	tags=19%, list=13%, signal=22%
PI3K AKT ACTIVATION%REACTOME%R-HSA-198203.2	PI3K AKT ACTIVATION%REACTOME%R-HSA-198203.2		103	0.341495	1.28566	0.0725926	0.444077	1	2246	tags=22%, list=14%, signal=26%
BIOCARTA_IL22BP_PATHWAY%MSIGDB_C2%BIOCARTA_IL22BP_PATHWAY	BIOCARTA_IL22BP_PATHWAY%MSIGDB_C2%BIOCARTA_IL22BP_PATHWAY		15	0.503174	1.28556	0.176991	0.442509	1	2534	tags=33%, list=16%, signal=40%
G-PROTEIN MEDIATED EVENTS%REACTOME DATABASE ID RELEASE 57%112040	G-PROTEIN MEDIATED EVENTS%REACTOME DATABASE ID RELEASE 57%112040		43	0.398021	1.28545	0.112135	0.440974	1	3910	tags=42%, list=24%, signal=55%
PI-3K CASCADE:FGFR3%REACTOME DATABASE ID RELEASE 57%5654710	PI-3K CASCADE:FGFR3%REACTOME DATABASE ID RELEASE 57%5654710		101	0.343801	1.28409	0.0761494	0.442617	1	2246	tags=23%, list=14%, signal=26%
VEGF SIGNALING PATHWAY%PANTHER PATHWAY%P00056	VEGF SIGNALING PATHWAY%PANTHER PATHWAY%P00056		56	0.379905	1.28386	0.0941358	0.441459	1	2338	tags=23%, list=15%, signal=27%
PIP3 ACTIVATES AKT SIGNALING%REACTOME%R-HSA-1257604.4	PIP3 ACTIVATES AKT SIGNALING%REACTOME%R-HSA-1257604.4		101	0.343801	1.28379	0.077886	0.439793	1	2246	tags=23%, list=14%, signal=26%
PI-3K CASCADE:FGFR1%REACTOME DATABASE ID RELEASE 57%5654689	PI-3K CASCADE:FGFR1%REACTOME DATABASE ID RELEASE 57%5654689		101	0.343801	1.28327	0.0826087	0.439396	1	2246	tags=23%, list=14%, signal=26%
P38 SIGNALING MEDIATED BY MAPKAP KINASES%PATHWAY INTERACTION DATABASE NCI-NATURE CURATED DATA%P38 SIGNALING MEDIATED BY MAPKAP KINASES	P38 SIGNALING MEDIATED BY MAPKAP KINASES%PATHWAY INTERACTION DATABASE NCI-NATURE CURATED DATA%P38 SIGNALING MEDIATED BY MAPKAP KINASES		20	0.463288	1.28257	0.157546	0.43944	1	2002	tags=20%, list=12%, signal=23%
IL8- AND CXCR2-MEDIATED SIGNALING EVENTS%PATHWAY INTERACTION DATABASE NCI-NATURE CURATED DATA%IL8- AND CXCR2-MEDIATED SIGNALING EVENTS	IL8- AND CXCR2-MEDIATED SIGNALING EVENTS%PATHWAY INTERACTION DATABASE NCI-NATURE CURATED DATA%IL8- AND CXCR2-MEDIATED SIGNALING EVENTS		33	0.412111	1.28158	0.133226	0.440342	1	3626	tags=39%, list=23%, signal=51%
PID_PDGFRB_PATHWAY%MSIGDB_C2%PID_PDGFRB_PATHWAY	PID_PDGFRB_PATHWAY%MSIGDB_C2%PID_PDGFRB_PATHWAY		120	0.332048	1.28099	0.0797721	0.440178	1	3260	tags=29%, list=20%, signal=36%
REGULATION OF COMPLEMENT CASCADE%REACTOME%R-HSA-977606.2	REGULATION OF COMPLEMENT CASCADE%REACTOME%R-HSA-977606.2		16	0.499628	1.28072	0.164452	0.439181	1	2575	tags=31%, list=16%, signal=37%
GAB1 SIGNALOSOME%REACTOME DATABASE ID RELEASE 57%180292	GAB1 SIGNALOSOME%REACTOME DATABASE ID RELEASE 57%180292		104	0.342366	1.28055	0.0787519	0.437908	1	2297	tags=23%, list=14%, signal=27%
PI-3K CASCADE:FGFR4%REACTOME%R-HSA-5654720.1	PI-3K CASCADE:FGFR4%REACTOME%R-HSA-5654720.1		101	0.343801	1.28031	0.0915493	0.436851	1	2246	tags=23%, list=14%, signal=26%
VISUAL SIGNAL TRANSDUCTION: CONES%PATHWAY INTERACTION DATABASE NCI-NATURE CURATED DATA%VISUAL SIGNAL TRANSDUCTION: CONES	VISUAL SIGNAL TRANSDUCTION: CONES%PATHWAY INTERACTION DATABASE NCI-NATURE CURATED DATA%VISUAL SIGNAL TRANSDUCTION: CONES		21	0.465244	1.2801	0.153589	0.435702	1	3250	tags=29%, list=20%, signal=36%
EGFR1%IOB%EGFR1	EGFR1%IOB%EGFR1		414	0.291318	1.27818	0.0165877	0.438859	1	3942	tags=31%, list=25%, signal=40%
PID_CONE_PATHWAY%MSIGDB_C2%PID_CONE_PATHWAY	PID_CONE_PATHWAY%MSIGDB_C2%PID_CONE_PATHWAY		21	0.465244	1.27761	0.159396	0.438558	1	3250	tags=29%, list=20%, signal=36%
NECTIN ADHESION PATHWAY%PATHWAY INTERACTION DATABASE NCI-NATURE CURATED DATA%NECTIN ADHESION PATHWAY	NECTIN ADHESION PATHWAY%PATHWAY INTERACTION DATABASE NCI-NATURE CURATED DATA%NECTIN ADHESION PATHWAY		24	0.446107	1.2755	0.163636	0.442088	1	3571	tags=42%, list=22%, signal=54%
ERBB4 SIGNALING EVENTS%PATHWAY INTERACTION DATABASE NCI-NATURE CURATED DATA%ERBB4 SIGNALING EVENTS	ERBB4 SIGNALING EVENTS%PATHWAY INTERACTION DATABASE NCI-NATURE CURATED DATA%ERBB4 SIGNALING EVENTS		33	0.410744	1.27517	0.144462	0.441229	1	1881	tags=27%, list=12%, signal=31%
PROSTACYCLIN SIGNALLING THROUGH PROSTACYCLIN RECEPTOR%REACTOME%R-HSA-392851.2	PROSTACYCLIN SIGNALLING THROUGH PROSTACYCLIN RECEPTOR%REACTOME%R-HSA-392851.2		17	0.477912	1.27488	0.165202	0.440215	1	1382	tags=24%, list=9%, signal=26%
LEPTIN%IOB%LEPTIN	LEPTIN%IOB%LEPTIN		44	0.393562	1.27478	0.139571	0.438782	1	2462	tags=25%, list=15%, signal=29%
HALLMARK_ANGIOGENESIS%MSIGDB_C2%HALLMARK_ANGIOGENESIS	HALLMARK_ANGIOGENESIS%MSIGDB_C2%HALLMARK_ANGIOGENESIS		34	0.411889	1.27409	0.129296	0.438886	1	4057	tags=44%, list=25%, signal=59%
COLLAGEN DEGRADATION%REACTOME DATABASE ID RELEASE 57%1442490	COLLAGEN DEGRADATION%REACTOME DATABASE ID RELEASE 57%1442490		36	0.40437	1.27373	0.128165	0.438028	1	1742	tags=19%, list=11%, signal=22%
OTHER SEMAPHORIN INTERACTIONS%REACTOME DATABASE ID RELEASE 57%416700	OTHER SEMAPHORIN INTERACTIONS%REACTOME DATABASE ID RELEASE 57%416700		19	0.464017	1.27353	0.139576	0.436953	1	2753	tags=32%, list=17%, signal=38%
PID_NFAT_TFPATHWAY%MSIGDB_C2%PID_NFAT_TFPATHWAY	PID_NFAT_TFPATHWAY%MSIGDB_C2%PID_NFAT_TFPATHWAY		42	0.393525	1.27196	0.129771	0.439347	1	1696	tags=19%, list=11%, signal=21%
PID_INTEGRIN5_PATHWAY%MSIGDB_C2%PID_INTEGRIN5_PATHWAY	PID_INTEGRIN5_PATHWAY%MSIGDB_C2%PID_INTEGRIN5_PATHWAY		17	0.484232	1.27193	0.157546	0.437753	1	2142	tags=29%, list=13%, signal=34%
PLC BETA MEDIATED EVENTS%REACTOME%R-HSA-112043.1	PLC BETA MEDIATED EVENTS%REACTOME%R-HSA-112043.1		42	0.39886	1.27125	0.137318	0.437968	1	3910	tags=43%, list=24%, signal=57%
BIOCARTA_TPO_PATHWAY%MSIGDB_C2%BIOCARTA_TPO_PATHWAY	BIOCARTA_TPO_PATHWAY%MSIGDB_C2%BIOCARTA_TPO_PATHWAY		23	0.444429	1.27104	0.168874	0.436913	1	1057	tags=22%, list=7%, signal=23%
RHO GTPASE CYCLE%REACTOME DATABASE ID RELEASE 57%194840	RHO GTPASE CYCLE%REACTOME DATABASE ID RELEASE 57%194840		109	0.339972	1.27071	0.0849858	0.436137	1	3434	tags=30%, list=21%, signal=38%
G-PROTEIN ACTIVATION%REACTOME DATABASE ID RELEASE 57%202040	G-PROTEIN ACTIVATION%REACTOME DATABASE ID RELEASE 57%202040		27	0.432596	1.26743	0.156452	0.442933	1	1382	tags=19%, list=9%, signal=20%
REGULATION OF CDC42 ACTIVITY%PATHWAY INTERACTION DATABASE NCI-NATURE CURATED DATA%REGULATION OF CDC42 ACTIVITY	REGULATION OF CDC42 ACTIVITY%PATHWAY INTERACTION DATABASE NCI-NATURE CURATED DATA%REGULATION OF CDC42 ACTIVITY		26	0.442756	1.26586	0.155993	0.445298	1	3587	tags=42%, list=22%, signal=54%
ADP SIGNALLING THROUGH P2Y PURINOCEPTOR 12%REACTOME DATABASE ID RELEASE 57%392170	ADP SIGNALLING THROUGH P2Y PURINOCEPTOR 12%REACTOME DATABASE ID RELEASE 57%392170		21	0.459809	1.26513	0.171186	0.445695	1	2982	tags=33%, list=19%, signal=41%
PID_NECTIN_PATHWAY%MSIGDB_C2%PID_NECTIN_PATHWAY	PID_NECTIN_PATHWAY%MSIGDB_C2%PID_NECTIN_PATHWAY		24	0.446107	1.26454	0.160772	0.445485	1	3571	tags=42%, list=22%, signal=54%
PHOSPHOLIPID METABOLISM%REACTOME%R-HSA-1483257.1	PHOSPHOLIPID METABOLISM%REACTOME%R-HSA-1483257.1		150	0.319565	1.26388	0.0662983	0.445615	1	3120	tags=29%, list=19%, signal=35%
VOLTAGE GATED POTASSIUM CHANNELS%REACTOME DATABASE ID RELEASE 57%1296072	VOLTAGE GATED POTASSIUM CHANNELS%REACTOME DATABASE ID RELEASE 57%1296072		43	0.393002	1.26366	0.143951	0.44446	1	2225	tags=23%, list=14%, signal=27%
ROLE OF LAT2 NTAL LAB ON CALCIUM MOBILIZATION%REACTOME%R-HSA-2730905.1	ROLE OF LAT2 NTAL LAB ON CALCIUM MOBILIZATION%REACTOME%R-HSA-2730905.1		106	0.330978	1.26235	0.0907821	0.4462	1	2246	tags=23%, list=14%, signal=26%
ION CHANNEL TRANSPORT%REACTOME%R-HSA-983712.1	ION CHANNEL TRANSPORT%REACTOME%R-HSA-983712.1		173	0.316133	1.26062	0.0675676	0.44895	1	4080	tags=35%, list=25%, signal=47%
GLUTAMATE NEUROTRANSMITTER RELEASE CYCLE%REACTOME DATABASE ID RELEASE 57%210500	GLUTAMATE NEUROTRANSMITTER RELEASE CYCLE%REACTOME DATABASE ID RELEASE 57%210500		18	0.470869	1.26022	0.180464	0.448236	1	1781	tags=28%, list=11%, signal=31%
BIOCARTA_IL10_PATHWAY%MSIGDB_C2%BIOCARTA_IL10_PATHWAY	BIOCARTA_IL10_PATHWAY%MSIGDB_C2%BIOCARTA_IL10_PATHWAY		16	0.485992	1.25755	0.178819	0.453494	1	4111	tags=44%, list=26%, signal=59%
BETA5 BETA6 BETA7 AND BETA8 INTEGRIN CELL SURFACE INTERACTIONS%PATHWAY INTERACTION DATABASE NCI-NATURE CURATED DATA%BETA5 BETA6 BETA7 AND BETA8 INTEGRIN CELL SURFACE INTERACTIONS	BETA5 BETA6 BETA7 AND BETA8 INTEGRIN CELL SURFACE INTERACTIONS%PATHWAY INTERACTION DATABASE NCI-NATURE CURATED DATA%BETA5 BETA6 BETA7 AND BETA8 INTEGRIN CELL SURFACE INTERACTIONS		17	0.484232	1.25606	0.166134	0.455771	1	2142	tags=29%, list=13%, signal=34%
ST_P38_MAPK_PATHWAY%MSIGDB_C2%ST_P38_MAPK_PATHWAY	ST_P38_MAPK_PATHWAY%MSIGDB_C2%ST_P38_MAPK_PATHWAY		31	0.415516	1.25591	0.148387	0.454489	1	2468	tags=23%, list=15%, signal=27%
CYTOKINE SIGNALING IN IMMUNE SYSTEM%REACTOME DATABASE ID RELEASE 57%1280215	CYTOKINE SIGNALING IN IMMUNE SYSTEM%REACTOME DATABASE ID RELEASE 57%1280215		493	0.28446	1.2556	0.0236127	0.453669	1	2585	tags=21%, list=16%, signal=24%
PID_ANGIOPOIETIN_RECEPTOR_PATHWAY%MSIGDB_C2%PID_ANGIOPOIETIN_RECEPTOR_PATHWAY	PID_ANGIOPOIETIN_RECEPTOR_PATHWAY%MSIGDB_C2%PID_ANGIOPOIETIN_RECEPTOR_PATHWAY		47	0.381505	1.25547	0.12601	0.452456	1	3635	tags=32%, list=23%, signal=41%
GABA-B_RECEPTOR_II_SIGNALING%PANTHER PATHWAY%P05731	GABA-B_RECEPTOR_II_SIGNALING%PANTHER PATHWAY%P05731		33	0.413976	1.25535	0.161184	0.451193	1	3910	tags=39%, list=24%, signal=52%
PID_P38_MK2_PATHWAY%MSIGDB_C2%PID_P38_MK2_PATHWAY	PID_P38_MK2_PATHWAY%MSIGDB_C2%PID_P38_MK2_PATHWAY		20	0.463288	1.25427	0.183673	0.452333	1	2002	tags=20%, list=12%, signal=23%
AXON GUIDANCE%REACTOME DATABASE ID RELEASE 57%422475	AXON GUIDANCE%REACTOME DATABASE ID RELEASE 57%422475		471	0.282721	1.25414	0.0250597	0.451074	1	2758	tags=23%, list=17%, signal=27%
AMINE-DERIVED HORMONES%REACTOME DATABASE ID RELEASE 57%209776	AMINE-DERIVED HORMONES%REACTOME DATABASE ID RELEASE 57%209776		17	0.475873	1.25385	0.183849	0.450239	1	4337	tags=41%, list=27%, signal=56%
PID_IL8_CXCR2_PATHWAY%MSIGDB_C2%PID_IL8_CXCR2_PATHWAY	PID_IL8_CXCR2_PATHWAY%MSIGDB_C2%PID_IL8_CXCR2_PATHWAY		33	0.412111	1.24962	0.150079	0.459697	1	3626	tags=39%, list=23%, signal=51%
PID_SMAD2_3NUCLEAR_PATHWAY%MSIGDB_C2%PID_SMAD2_3NUCLEAR_PATHWAY	PID_SMAD2_3NUCLEAR_PATHWAY%MSIGDB_C2%PID_SMAD2_3NUCLEAR_PATHWAY		76	0.344619	1.24904	0.123123	0.459601	1	5080	tags=33%, list=32%, signal=48%
PID_AR_PATHWAY%MSIGDB_C2%PID_AR_PATHWAY	PID_AR_PATHWAY%MSIGDB_C2%PID_AR_PATHWAY		50	0.373998	1.24579	0.14956	0.466696	1	2577	tags=26%, list=16%, signal=31%
EGFR1%NETPATH%EGFR1	EGFR1%NETPATH%EGFR1		424	0.284274	1.24507	0.0299401	0.466947	1	3942	tags=30%, list=25%, signal=39%
ARF1 PATHWAY%PATHWAY INTERACTION DATABASE NCI-NATURE CURATED DATA%ARF1 PATHWAY	ARF1 PATHWAY%PATHWAY INTERACTION DATABASE NCI-NATURE CURATED DATA%ARF1 PATHWAY		18	0.456678	1.24469	0.17893	0.46631	1	4373	tags=50%, list=27%, signal=69%
REGULATION OF NUCLEAR SMAD2 3 SIGNALING%PATHWAY INTERACTION DATABASE NCI-NATURE CURATED DATA%REGULATION OF NUCLEAR SMAD2 3 SIGNALING	REGULATION OF NUCLEAR SMAD2 3 SIGNALING%PATHWAY INTERACTION DATABASE NCI-NATURE CURATED DATA%REGULATION OF NUCLEAR SMAD2 3 SIGNALING		76	0.344619	1.24284	0.113982	0.469549	1	5080	tags=33%, list=32%, signal=48%
BIOCARTA_MAPK_PATHWAY%MSIGDB_C2%BIOCARTA_MAPK_PATHWAY	BIOCARTA_MAPK_PATHWAY%MSIGDB_C2%BIOCARTA_MAPK_PATHWAY		81	0.345498	1.24238	0.112121	0.469168	1	2688	tags=25%, list=17%, signal=30%
OPIOID SIGNALLING%REACTOME%R-HSA-111885.1	OPIOID SIGNALLING%REACTOME%R-HSA-111885.1		77	0.343373	1.23883	0.128086	0.476702	1	3630	tags=32%, list=23%, signal=42%
DISEASES OF GLYCOSYLATION%REACTOME%R-HSA-3781865.1	DISEASES OF GLYCOSYLATION%REACTOME%R-HSA-3781865.1		69	0.350563	1.23805	0.117021	0.477233	1	3822	tags=39%, list=24%, signal=51%
COREGULATION OF ANDROGEN RECEPTOR ACTIVITY%PATHWAY INTERACTION DATABASE NCI-NATURE CURATED DATA%COREGULATION OF ANDROGEN RECEPTOR ACTIVITY	COREGULATION OF ANDROGEN RECEPTOR ACTIVITY%PATHWAY INTERACTION DATABASE NCI-NATURE CURATED DATA%COREGULATION OF ANDROGEN RECEPTOR ACTIVITY		50	0.373998	1.23567	0.14178	0.481999	1	2577	tags=26%, list=16%, signal=31%
DISEASES ASSOCIATED WITH GLYCOSAMINOGLYCAN METABOLISM%REACTOME%R-HSA-3560782.2	DISEASES ASSOCIATED WITH GLYCOSAMINOGLYCAN METABOLISM%REACTOME%R-HSA-3560782.2		24	0.432462	1.2355	0.196078	0.480805	1	3822	tags=50%, list=24%, signal=66%
PID_MYC_REPRESS_PATHWAY%MSIGDB_C2%PID_MYC_REPRESS_PATHWAY	PID_MYC_REPRESS_PATHWAY%MSIGDB_C2%PID_MYC_REPRESS_PATHWAY		57	0.360987	1.2352	0.155963	0.479936	1	3557	tags=32%, list=22%, signal=40%
INSULIN IGF PATHWAY-MITOGEN ACTIVATED PROTEIN KINASE KINASE MAP KINASE CASCADE%PANTHER PATHWAY%P00032	INSULIN IGF PATHWAY-MITOGEN ACTIVATED PROTEIN KINASE KINASE MAP KINASE CASCADE%PANTHER PATHWAY%P00032		25	0.429159	1.2337	0.186441	0.482336	1	2299	tags=24%, list=14%, signal=28%
PID_S1P_S1P3_PATHWAY%MSIGDB_C2%PID_S1P_S1P3_PATHWAY	PID_S1P_S1P3_PATHWAY%MSIGDB_C2%PID_S1P_S1P3_PATHWAY		27	0.423655	1.23352	0.17817	0.481188	1	3167	tags=41%, list=20%, signal=51%
DIRECT P53 EFFECTORS%PATHWAY INTERACTION DATABASE NCI-NATURE CURATED DATA%DIRECT P53 EFFECTORS	DIRECT P53 EFFECTORS%PATHWAY INTERACTION DATABASE NCI-NATURE CURATED DATA%DIRECT P53 EFFECTORS		120	0.316432	1.2326	0.100982	0.482076	1	3190	tags=28%, list=20%, signal=35%
VALIDATED TARGETS OF C-MYC TRANSCRIPTIONAL REPRESSION%PATHWAY INTERACTION DATABASE NCI-NATURE CURATED DATA%VALIDATED TARGETS OF C-MYC TRANSCRIPTIONAL REPRESSION	VALIDATED TARGETS OF C-MYC TRANSCRIPTIONAL REPRESSION%PATHWAY INTERACTION DATABASE NCI-NATURE CURATED DATA%VALIDATED TARGETS OF C-MYC TRANSCRIPTIONAL REPRESSION		57	0.360987	1.23242	0.145997	0.480942	1	3557	tags=32%, list=22%, signal=40%
SIGNALING EVENTS MEDIATED BY PTP1B%PATHWAY INTERACTION DATABASE NCI-NATURE CURATED DATA%SIGNALING EVENTS MEDIATED BY PTP1B	SIGNALING EVENTS MEDIATED BY PTP1B%PATHWAY INTERACTION DATABASE NCI-NATURE CURATED DATA%SIGNALING EVENTS MEDIATED BY PTP1B		47	0.370035	1.23044	0.165354	0.484603	1	3258	tags=34%, list=20%, signal=43%
IFN-GAMMA%IOB%IFN-GAMMA	IFN-GAMMA%IOB%IFN-GAMMA		40	0.386484	1.23042	0.160572	0.483033	1	2678	tags=30%, list=17%, signal=36%
ST_DIFFERENTIATION_PATHWAY_IN_PC12_CELLS%MSIGDB_C2%ST_DIFFERENTIATION_PATHWAY_IN_PC12_CELLS	ST_DIFFERENTIATION_PATHWAY_IN_PC12_CELLS%MSIGDB_C2%ST_DIFFERENTIATION_PATHWAY_IN_PC12_CELLS		39	0.385541	1.23041	0.187285	0.481468	1	3564	tags=31%, list=22%, signal=39%
UPTAKE AND ACTIONS OF BACTERIAL TOXINS%REACTOME%R-HSA-5339562.1	UPTAKE AND ACTIONS OF BACTERIAL TOXINS%REACTOME%R-HSA-5339562.1		19	0.44962	1.22942	0.193656	0.482613	1	2885	tags=37%, list=18%, signal=45%
BIOCARTA_CARDIACEGF_PATHWAY%MSIGDB_C2%BIOCARTA_CARDIACEGF_PATHWAY	BIOCARTA_CARDIACEGF_PATHWAY%MSIGDB_C2%BIOCARTA_CARDIACEGF_PATHWAY		16	0.472769	1.22733	0.21562	0.48679	1	3027	tags=44%, list=19%, signal=54%
BIOCARTA_PDGF_PATHWAY%MSIGDB_C2%BIOCARTA_PDGF_PATHWAY	BIOCARTA_PDGF_PATHWAY%MSIGDB_C2%BIOCARTA_PDGF_PATHWAY		30	0.409917	1.22674	0.190994	0.486695	1	2462	tags=27%, list=15%, signal=31%
SIGNALING BY INTERLEUKINS%REACTOME%R-HSA-449147.5	SIGNALING BY INTERLEUKINS%REACTOME%R-HSA-449147.5		343	0.284246	1.22465	0.0433673	0.490597	1	2585	tags=21%, list=16%, signal=25%
BINDING AND UPTAKE OF LIGANDS BY SCAVENGER RECEPTORS%REACTOME%R-HSA-2173782.1	BINDING AND UPTAKE OF LIGANDS BY SCAVENGER RECEPTORS%REACTOME%R-HSA-2173782.1		30	0.410956	1.2233	0.200326	0.492675	1	4598	tags=37%, list=29%, signal=51%
PID_PTP1B_PATHWAY%MSIGDB_C2%PID_PTP1B_PATHWAY	PID_PTP1B_PATHWAY%MSIGDB_C2%PID_PTP1B_PATHWAY		47	0.370035	1.22315	0.152276	0.491449	1	3258	tags=34%, list=20%, signal=43%
GLUCAGON-LIKE PEPTIDE-1 (GLP1) REGULATES INSULIN SECRETION%REACTOME%R-HSA-381676.1	GLUCAGON-LIKE PEPTIDE-1 (GLP1) REGULATES INSULIN SECRETION%REACTOME%R-HSA-381676.1		39	0.381536	1.22268	0.174603	0.49109	1	1540	tags=21%, list=10%, signal=23%
PID_ARF_3PATHWAY%MSIGDB_C2%PID_ARF_3PATHWAY	PID_ARF_3PATHWAY%MSIGDB_C2%PID_ARF_3PATHWAY		18	0.456677	1.22053	0.198618	0.495467	1	4373	tags=50%, list=27%, signal=69%
CELL JUNCTION ORGANIZATION%REACTOME DATABASE ID RELEASE 57%446728	CELL JUNCTION ORGANIZATION%REACTOME DATABASE ID RELEASE 57%446728		74	0.344965	1.21997	0.145286	0.495475	1	4770	tags=39%, list=30%, signal=56%
IONOTROPIC GLUTAMATE RECEPTOR PATHWAY%PANTHER PATHWAY%P00037	IONOTROPIC GLUTAMATE RECEPTOR PATHWAY%PANTHER PATHWAY%P00037		40	0.384277	1.21916	0.174254	0.496086	1	2807	tags=35%, list=18%, signal=42%
PHOSPHOLIPASES%HUMANCYC%LIPASYN-PWY	PHOSPHOLIPASES%HUMANCYC%LIPASYN-PWY		34	0.395878	1.21874	0.190476	0.49566	1	5110	tags=47%, list=32%, signal=69%
NCAM SIGNALING FOR NEURITE OUT-GROWTH%REACTOME DATABASE ID RELEASE 57%375165	NCAM SIGNALING FOR NEURITE OUT-GROWTH%REACTOME DATABASE ID RELEASE 57%375165		224	0.295714	1.21812	0.0799476	0.495759	1	2318	tags=20%, list=14%, signal=23%
ANGIOPOIETIN RECEPTOR TIE2-MEDIATED SIGNALING%PATHWAY INTERACTION DATABASE NCI-NATURE CURATED DATA%ANGIOPOIETIN RECEPTOR TIE2-MEDIATED SIGNALING	ANGIOPOIETIN RECEPTOR TIE2-MEDIATED SIGNALING%PATHWAY INTERACTION DATABASE NCI-NATURE CURATED DATA%ANGIOPOIETIN RECEPTOR TIE2-MEDIATED SIGNALING		46	0.369688	1.21806	0.164516	0.494386	1	3635	tags=30%, list=23%, signal=39%
EGFR DOWNREGULATION%REACTOME DATABASE ID RELEASE 57%182971	EGFR DOWNREGULATION%REACTOME DATABASE ID RELEASE 57%182971		15	0.479226	1.21738	0.211823	0.494589	1	1761	tags=27%, list=11%, signal=30%
ALPHA9 BETA1 INTEGRIN SIGNALING EVENTS%PATHWAY INTERACTION DATABASE NCI-NATURE CURATED DATA%ALPHA9 BETA1 INTEGRIN SIGNALING EVENTS	ALPHA9 BETA1 INTEGRIN SIGNALING EVENTS%PATHWAY INTERACTION DATABASE NCI-NATURE CURATED DATA%ALPHA9 BETA1 INTEGRIN SIGNALING EVENTS		25	0.41455	1.2171	0.199667	0.493785	1	617	tags=20%, list=4%, signal=21%
G ALPHA (Q) SIGNALLING EVENTS%REACTOME DATABASE ID RELEASE 57%416476	G ALPHA (Q) SIGNALLING EVENTS%REACTOME DATABASE ID RELEASE 57%416476		170	0.301677	1.21673	0.106952	0.493254	1	3472	tags=26%, list=22%, signal=33%
CALCINEURIN-REGULATED NFAT-DEPENDENT TRANSCRIPTION IN LYMPHOCYTES%PATHWAY INTERACTION DATABASE NCI-NATURE CURATED DATA%CALCINEURIN-REGULATED NFAT-DEPENDENT TRANSCRIPTION IN LYMPHOCYTES	CALCINEURIN-REGULATED NFAT-DEPENDENT TRANSCRIPTION IN LYMPHOCYTES%PATHWAY INTERACTION DATABASE NCI-NATURE CURATED DATA%CALCINEURIN-REGULATED NFAT-DEPENDENT TRANSCRIPTION IN LYMPHOCYTES		41	0.376098	1.21575	0.196568	0.494237	1	1627	tags=17%, list=10%, signal=19%
PID_P53_DOWNSTREAM_PATHWAY%MSIGDB_C2%PID_P53_DOWNSTREAM_PATHWAY	PID_P53_DOWNSTREAM_PATHWAY%MSIGDB_C2%PID_P53_DOWNSTREAM_PATHWAY		120	0.316432	1.21353	0.113181	0.498692	1	3190	tags=28%, list=20%, signal=35%
HISTAMINE H2 RECEPTOR MEDIATED SIGNALING PATHWAY%PANTHER PATHWAY%P04386	HISTAMINE H2 RECEPTOR MEDIATED SIGNALING PATHWAY%PANTHER PATHWAY%P04386		22	0.43473	1.2133	0.199673	0.497805	1	1382	tags=18%, list=9%, signal=20%
PID_CD8_TCR_DOWNSTREAM_PATHWAY%MSIGDB_C2%PID_CD8_TCR_DOWNSTREAM_PATHWAY	PID_CD8_TCR_DOWNSTREAM_PATHWAY%MSIGDB_C2%PID_CD8_TCR_DOWNSTREAM_PATHWAY		48	0.358548	1.21292	0.170455	0.497323	1	1095	tags=13%, list=7%, signal=13%
BIOCARTA_INTEGRIN_PATHWAY%MSIGDB_C2%BIOCARTA_INTEGRIN_PATHWAY	BIOCARTA_INTEGRIN_PATHWAY%MSIGDB_C2%BIOCARTA_INTEGRIN_PATHWAY		36	0.38531	1.21276	0.198319	0.496231	1	4220	tags=36%, list=26%, signal=49%
GROWTH HORMONE RECEPTOR SIGNALING%REACTOME%R-HSA-982772.1	GROWTH HORMONE RECEPTOR SIGNALING%REACTOME%R-HSA-982772.1		17	0.463339	1.2121	0.237856	0.4965	1	770	tags=18%, list=5%, signal=19%
MUSCARINIC ACETYLCHOLINE RECEPTOR 1 AND 3 SIGNALING PATHWAY%PANTHER PATHWAY%P00042	MUSCARINIC ACETYLCHOLINE RECEPTOR 1 AND 3 SIGNALING PATHWAY%PANTHER PATHWAY%P00042		51	0.35782	1.21168	0.161787	0.496044	1	1382	tags=18%, list=9%, signal=19%
GLYCOSPHINGOLIPID METABOLISM%REACTOME%R-HSA-1660662.3	GLYCOSPHINGOLIPID METABOLISM%REACTOME%R-HSA-1660662.3		35	0.387669	1.21101	0.204918	0.496431	1	2966	tags=37%, list=18%, signal=45%
ARF6 TRAFFICKING EVENTS%PATHWAY INTERACTION DATABASE NCI-NATURE CURATED DATA%ARF6 TRAFFICKING EVENTS	ARF6 TRAFFICKING EVENTS%PATHWAY INTERACTION DATABASE NCI-NATURE CURATED DATA%ARF6 TRAFFICKING EVENTS		43	0.371873	1.20724	0.185299	0.505122	1	3429	tags=28%, list=21%, signal=35%
BIOCARTA_CDMAC_PATHWAY%MSIGDB_C2%BIOCARTA_CDMAC_PATHWAY	BIOCARTA_CDMAC_PATHWAY%MSIGDB_C2%BIOCARTA_CDMAC_PATHWAY		16	0.474297	1.20723	0.251656	0.503611	1	1084	tags=25%, list=7%, signal=27%
BIOCARTA_IGF1_PATHWAY%MSIGDB_C2%BIOCARTA_IGF1_PATHWAY	BIOCARTA_IGF1_PATHWAY%MSIGDB_C2%BIOCARTA_IGF1_PATHWAY		20	0.440594	1.20313	0.228995	0.513119	1	3117	tags=30%, list=19%, signal=37%
PRESYNAPTIC FUNCTION OF KAINATE RECEPTORS%REACTOME DATABASE ID RELEASE 57%500657	PRESYNAPTIC FUNCTION OF KAINATE RECEPTORS%REACTOME DATABASE ID RELEASE 57%500657		20	0.44404	1.19979	0.236207	0.520756	1	3472	tags=40%, list=22%, signal=51%
FCERI MEDIATED CA+2 MOBILIZATION%REACTOME DATABASE ID RELEASE 57%2871809	FCERI MEDIATED CA+2 MOBILIZATION%REACTOME DATABASE ID RELEASE 57%2871809		23	0.425806	1.19929	0.222571	0.520476	1	5672	tags=57%, list=35%, signal=87%
DAG AND IP3 SIGNALING%REACTOME%R-HSA-1489509.2	DAG AND IP3 SIGNALING%REACTOME%R-HSA-1489509.2		30	0.400373	1.19883	0.2187	0.520117	1	3910	tags=47%, list=24%, signal=62%
DOWNSTREAM SIGNALING IN NAIVE CD8+ T CELLS%PATHWAY INTERACTION DATABASE NCI-NATURE CURATED DATA%DOWNSTREAM SIGNALING IN NAIVE CD8+ T CELLS	DOWNSTREAM SIGNALING IN NAIVE CD8+ T CELLS%PATHWAY INTERACTION DATABASE NCI-NATURE CURATED DATA%DOWNSTREAM SIGNALING IN NAIVE CD8+ T CELLS		46	0.368675	1.19783	0.191045	0.521385	1	1095	tags=13%, list=7%, signal=14%
PID_INTEGRIN_A9B1_PATHWAY%MSIGDB_C2%PID_INTEGRIN_A9B1_PATHWAY	PID_INTEGRIN_A9B1_PATHWAY%MSIGDB_C2%PID_INTEGRIN_A9B1_PATHWAY		25	0.41455	1.19775	0.21987	0.520073	1	617	tags=20%, list=4%, signal=21%
PID_CXCR4_PATHWAY%MSIGDB_C2%PID_CXCR4_PATHWAY	PID_CXCR4_PATHWAY%MSIGDB_C2%PID_CXCR4_PATHWAY		93	0.324338	1.19703	0.128427	0.520548	1	3472	tags=32%, list=22%, signal=41%
FCGAMMA RECEPTOR (FCGR) DEPENDENT PHAGOCYTOSIS%REACTOME DATABASE ID RELEASE 57%2029480	FCGAMMA RECEPTOR (FCGR) DEPENDENT PHAGOCYTOSIS%REACTOME DATABASE ID RELEASE 57%2029480		72	0.336509	1.19635	0.166419	0.520775	1	3501	tags=26%, list=22%, signal=34%
INTERFERON SIGNALING%REACTOME DATABASE ID RELEASE 57%913531	INTERFERON SIGNALING%REACTOME DATABASE ID RELEASE 57%913531		120	0.313121	1.19509	0.160405	0.52265	1	2863	tags=26%, list=18%, signal=31%
MYD88 CASCADE INITIATED ON PLASMA MEMBRANE%REACTOME%R-HSA-975871.1	MYD88 CASCADE INITIATED ON PLASMA MEMBRANE%REACTOME%R-HSA-975871.1		71	0.336043	1.19477	0.17673	0.521968	1	1768	tags=21%, list=11%, signal=24%
DOWNREGULATION OF SMAD2 3:SMAD4 TRANSCRIPTIONAL ACTIVITY%REACTOME DATABASE ID RELEASE 57%2173795	DOWNREGULATION OF SMAD2 3:SMAD4 TRANSCRIPTIONAL ACTIVITY%REACTOME DATABASE ID RELEASE 57%2173795		18	0.45291	1.19419	0.233553	0.522015	1	4036	tags=39%, list=25%, signal=52%
TOLL LIKE RECEPTOR 5 (TLR5) CASCADE%REACTOME%R-HSA-168176.1	TOLL LIKE RECEPTOR 5 (TLR5) CASCADE%REACTOME%R-HSA-168176.1		71	0.336043	1.19315	0.163859	0.523294	1	1768	tags=21%, list=11%, signal=24%
G ALPHA (12 13) SIGNALLING EVENTS%REACTOME%R-HSA-416482.2	G ALPHA (12 13) SIGNALLING EVENTS%REACTOME%R-HSA-416482.2		70	0.33519	1.19234	0.182371	0.52406	1	2420	tags=21%, list=15%, signal=25%
RAS ACTIVATION UOPN CA2+ INFUX THROUGH NMDA RECEPTOR%REACTOME%R-HSA-442982.1	RAS ACTIVATION UOPN CA2+ INFUX THROUGH NMDA RECEPTOR%REACTOME%R-HSA-442982.1		15	0.463563	1.19232	0.241026	0.522626	1	3553	tags=40%, list=22%, signal=51%
TRAF6 MEDIATED INDUCTION OF NFKB AND MAP KINASES UPON TLR7 8 OR 9 ACTIVATION%REACTOME DATABASE ID RELEASE 57%975138	TRAF6 MEDIATED INDUCTION OF NFKB AND MAP KINASES UPON TLR7 8 OR 9 ACTIVATION%REACTOME DATABASE ID RELEASE 57%975138		72	0.336566	1.19219	0.175305	0.521501	1	3201	tags=29%, list=20%, signal=36%
FORMATION OF FIBRIN CLOT (CLOTTING CASCADE)%REACTOME DATABASE ID RELEASE 57%140877	FORMATION OF FIBRIN CLOT (CLOTTING CASCADE)%REACTOME DATABASE ID RELEASE 57%140877		34	0.386496	1.18999	0.200686	0.526008	1	4168	tags=32%, list=26%, signal=44%
OPIOID PROENKEPHALIN PATHWAY%PANTHER PATHWAY%P05915	OPIOID PROENKEPHALIN PATHWAY%PANTHER PATHWAY%P05915		28	0.405111	1.1888	0.2256	0.52766	1	458	tags=14%, list=3%, signal=15%
SIALIC ACID METABOLISM%REACTOME%R-HSA-4085001.1	SIALIC ACID METABOLISM%REACTOME%R-HSA-4085001.1		31	0.397477	1.18868	0.219243	0.526453	1	2776	tags=32%, list=17%, signal=39%
SYNDECAN-2-MEDIATED SIGNALING EVENTS%PATHWAY INTERACTION DATABASE NCI-NATURE CURATED DATA%SYNDECAN-2-MEDIATED SIGNALING EVENTS	SYNDECAN-2-MEDIATED SIGNALING EVENTS%PATHWAY INTERACTION DATABASE NCI-NATURE CURATED DATA%SYNDECAN-2-MEDIATED SIGNALING EVENTS		31	0.386077	1.18568	0.207856	0.533354	1	2150	tags=26%, list=13%, signal=30%
NABA_ECM_REGULATORS%MSIGDB_C2%NABA_ECM_REGULATORS	NABA_ECM_REGULATORS%MSIGDB_C2%NABA_ECM_REGULATORS		192	0.291832	1.18344	0.123967	0.538231	1	3463	tags=26%, list=22%, signal=33%
STRIATED MUSCLE CONTRACTION%REACTOME DATABASE ID RELEASE 57%390522	STRIATED MUSCLE CONTRACTION%REACTOME DATABASE ID RELEASE 57%390522		30	0.394274	1.18243	0.247541	0.539461	1	2934	tags=20%, list=18%, signal=24%
PLC-GAMMA1 SIGNALLING%REACTOME DATABASE ID RELEASE 57%167021	PLC-GAMMA1 SIGNALLING%REACTOME DATABASE ID RELEASE 57%167021		32	0.392231	1.18204	0.222586	0.538976	1	3910	tags=44%, list=24%, signal=58%
E-CADHERIN SIGNALING IN KERATINOCYTES%PATHWAY INTERACTION DATABASE NCI-NATURE CURATED DATA%E-CADHERIN SIGNALING IN KERATINOCYTES	E-CADHERIN SIGNALING IN KERATINOCYTES%PATHWAY INTERACTION DATABASE NCI-NATURE CURATED DATA%E-CADHERIN SIGNALING IN KERATINOCYTES		17	0.445771	1.18029	0.225166	0.542476	1	4651	tags=47%, list=29%, signal=66%
HALLMARK_HEME_METABOLISM%MSIGDB_C2%HALLMARK_HEME_METABOLISM	HALLMARK_HEME_METABOLISM%MSIGDB_C2%HALLMARK_HEME_METABOLISM		170	0.295028	1.17921	0.15252	0.543897	1	3199	tags=26%, list=20%, signal=33%
PID_ERBB4_PATHWAY%MSIGDB_C2%PID_ERBB4_PATHWAY	PID_ERBB4_PATHWAY%MSIGDB_C2%PID_ERBB4_PATHWAY		35	0.377627	1.17709	0.235747	0.548305	1	3785	tags=40%, list=24%, signal=52%
O-LINKED GLYCOSYLATION%REACTOME%R-HSA-5173105.2	O-LINKED GLYCOSYLATION%REACTOME%R-HSA-5173105.2		89	0.319119	1.17682	0.164286	0.547499	1	4680	tags=44%, list=29%, signal=62%
SPHINGOLIPID METABOLISM%REACTOME DATABASE ID RELEASE 57%428157	SPHINGOLIPID METABOLISM%REACTOME DATABASE ID RELEASE 57%428157		67	0.338779	1.17608	0.19062	0.547994	1	2675	tags=28%, list=17%, signal=34%
TOLL LIKE RECEPTOR 10 (TLR10) CASCADE%REACTOME%R-HSA-168142.1	TOLL LIKE RECEPTOR 10 (TLR10) CASCADE%REACTOME%R-HSA-168142.1		71	0.336043	1.17488	0.174101	0.549851	1	1768	tags=21%, list=11%, signal=24%
THE PHOTOTRANSDUCTION CASCADE%REACTOME DATABASE ID RELEASE 57%2514856	THE PHOTOTRANSDUCTION CASCADE%REACTOME DATABASE ID RELEASE 57%2514856		26	0.404204	1.17362	0.249201	0.551819	1	935	tags=19%, list=6%, signal=20%
DEFECTIVE B3GALT6 CAUSES EDSP2 AND SEMDJL1%REACTOME%R-HSA-4420332.1	DEFECTIVE B3GALT6 CAUSES EDSP2 AND SEMDJL1%REACTOME%R-HSA-4420332.1		18	0.435487	1.17141	0.260794	0.556643	1	3822	tags=56%, list=24%, signal=73%
PROTEIN-PROTEIN INTERACTIONS AT SYNAPSES%REACTOME%R-HSA-6794362.1	PROTEIN-PROTEIN INTERACTIONS AT SYNAPSES%REACTOME%R-HSA-6794362.1		46	0.355843	1.17114	0.205342	0.555896	1	2919	tags=35%, list=18%, signal=42%
BIOCARTA_AT1R_PATHWAY%MSIGDB_C2%BIOCARTA_AT1R_PATHWAY	BIOCARTA_AT1R_PATHWAY%MSIGDB_C2%BIOCARTA_AT1R_PATHWAY		27	0.399598	1.16993	0.241436	0.557733	1	3167	tags=30%, list=20%, signal=37%
TOLL LIKE RECEPTOR 7 8 (TLR7 8) CASCADE%REACTOME%R-HSA-168181.1	TOLL LIKE RECEPTOR 7 8 (TLR7 8) CASCADE%REACTOME%R-HSA-168181.1		74	0.321654	1.16928	0.196646	0.557991	1	1768	tags=20%, list=11%, signal=23%
TNFS BIND THEIR PHYSIOLOGICAL RECEPTORS%REACTOME%R-HSA-5669034.1	TNFS BIND THEIR PHYSIOLOGICAL RECEPTORS%REACTOME%R-HSA-5669034.1		24	0.404483	1.16896	0.229565	0.557284	1	3614	tags=29%, list=23%, signal=38%
DEFECTIVE B4GALT7 CAUSES EDS, PROGEROID TYPE%REACTOME DATABASE ID RELEASE 57%3560783	DEFECTIVE B4GALT7 CAUSES EDS, PROGEROID TYPE%REACTOME DATABASE ID RELEASE 57%3560783		18	0.435487	1.16886	0.2752	0.556066	1	3822	tags=56%, list=24%, signal=73%
MAPK FAMILY SIGNALING CASCADES%REACTOME DATABASE ID RELEASE 57%5683057	MAPK FAMILY SIGNALING CASCADES%REACTOME DATABASE ID RELEASE 57%5683057		236	0.283242	1.16778	0.128609	0.557687	1	2585	tags=21%, list=16%, signal=25%
SHP2 SIGNALING%PATHWAY INTERACTION DATABASE NCI-NATURE CURATED DATA%SHP2 SIGNALING	SHP2 SIGNALING%PATHWAY INTERACTION DATABASE NCI-NATURE CURATED DATA%SHP2 SIGNALING		54	0.35133	1.16737	0.221529	0.557249	1	3635	tags=33%, list=23%, signal=43%
BIOCARTA_INTRINSIC_PATHWAY%MSIGDB_C2%BIOCARTA_INTRINSIC_PATHWAY	BIOCARTA_INTRINSIC_PATHWAY%MSIGDB_C2%BIOCARTA_INTRINSIC_PATHWAY		21	0.424722	1.16687	0.26461	0.557167	1	4152	tags=33%, list=26%, signal=45%
PID_NOTCH_PATHWAY%MSIGDB_C2%PID_NOTCH_PATHWAY	PID_NOTCH_PATHWAY%MSIGDB_C2%PID_NOTCH_PATHWAY		52	0.34287	1.16549	0.23576	0.559739	1	3483	tags=35%, list=22%, signal=44%
PID_SYNDECAN_2_PATHWAY%MSIGDB_C2%PID_SYNDECAN_2_PATHWAY	PID_SYNDECAN_2_PATHWAY%MSIGDB_C2%PID_SYNDECAN_2_PATHWAY		28	0.39397	1.16514	0.239024	0.5593	1	2041	tags=25%, list=13%, signal=29%
INTRINSIC PATHWAY OF FIBRIN CLOT FORMATION%REACTOME%R-HSA-140837.1	INTRINSIC PATHWAY OF FIBRIN CLOT FORMATION%REACTOME%R-HSA-140837.1		20	0.427406	1.16509	0.263432	0.557885	1	4152	tags=35%, list=26%, signal=47%
TRANSPORT OF INORGANIC CATIONS ANIONS AND AMINO ACIDS OLIGOPEPTIDES%REACTOME DATABASE ID RELEASE 57%425393	TRANSPORT OF INORGANIC CATIONS ANIONS AND AMINO ACIDS OLIGOPEPTIDES%REACTOME DATABASE ID RELEASE 57%425393		91	0.315742	1.16195	0.190896	0.564946	1	3958	tags=36%, list=25%, signal=48%
STIMULI-SENSING CHANNELS%REACTOME DATABASE ID RELEASE 57%2672351	STIMULI-SENSING CHANNELS%REACTOME DATABASE ID RELEASE 57%2672351		80	0.321853	1.16168	0.212922	0.564243	1	4293	tags=41%, list=27%, signal=56%
ACTIVATION OF NMDA RECEPTOR UPON GLUTAMATE BINDING AND POSTSYNAPTIC EVENTS%REACTOME DATABASE ID RELEASE 57%442755	ACTIVATION OF NMDA RECEPTOR UPON GLUTAMATE BINDING AND POSTSYNAPTIC EVENTS%REACTOME DATABASE ID RELEASE 57%442755		36	0.373746	1.16139	0.247961	0.563505	1	3630	tags=39%, list=23%, signal=50%
NRAGE SIGNALS DEATH THROUGH JNK%REACTOME%R-HSA-193648.1	NRAGE SIGNALS DEATH THROUGH JNK%REACTOME%R-HSA-193648.1		44	0.354503	1.16052	0.23622	0.564288	1	4920	tags=43%, list=31%, signal=62%
INTERACTION BETWEEN L1 AND ANKYRINS%REACTOME DATABASE ID RELEASE 57%445095	INTERACTION BETWEEN L1 AND ANKYRINS%REACTOME DATABASE ID RELEASE 57%445095		27	0.385914	1.15901	0.259076	0.566986	1	5328	tags=59%, list=33%, signal=89%
RANKL%NETPATH%RANKL	RANKL%NETPATH%RANKL		74	0.321961	1.156	0.223665	0.573947	1	2158	tags=20%, list=13%, signal=23%
PID_ECADHERIN_KERATINOCYTE_PATHWAY%MSIGDB_C2%PID_ECADHERIN_KERATINOCYTE_PATHWAY	PID_ECADHERIN_KERATINOCYTE_PATHWAY%MSIGDB_C2%PID_ECADHERIN_KERATINOCYTE_PATHWAY		17	0.445771	1.15594	0.278438	0.572614	1	4651	tags=47%, list=29%, signal=66%
PID_SHP2_PATHWAY%MSIGDB_C2%PID_SHP2_PATHWAY	PID_SHP2_PATHWAY%MSIGDB_C2%PID_SHP2_PATHWAY		55	0.343466	1.15467	0.237082	0.574686	1	3635	tags=33%, list=23%, signal=42%
INTERACTIONS OF NEUREXINS AND NEUROLIGINS AT SYNAPSES%REACTOME%R-HSA-6794361.1	INTERACTIONS OF NEUREXINS AND NEUROLIGINS AT SYNAPSES%REACTOME%R-HSA-6794361.1		46	0.355843	1.15394	0.250389	0.575241	1	2919	tags=35%, list=18%, signal=42%
BIOCARTA_NKCELLS_PATHWAY%MSIGDB_C2%BIOCARTA_NKCELLS_PATHWAY	BIOCARTA_NKCELLS_PATHWAY%MSIGDB_C2%BIOCARTA_NKCELLS_PATHWAY		15	0.45545	1.1529	0.280072	0.576889	1	2338	tags=27%, list=15%, signal=31%
CALMODULIN INDUCED EVENTS%REACTOME%R-HSA-111933.1	CALMODULIN INDUCED EVENTS%REACTOME%R-HSA-111933.1		24	0.40537	1.15248	0.271478	0.576603	1	3910	tags=50%, list=24%, signal=66%
CAM PATHWAY%REACTOME DATABASE ID RELEASE 57%111997	CAM PATHWAY%REACTOME DATABASE ID RELEASE 57%111997		24	0.40537	1.15159	0.268041	0.577682	1	3910	tags=50%, list=24%, signal=66%
ADP SIGNALLING THROUGH P2Y PURINOCEPTOR 1%REACTOME DATABASE ID RELEASE 57%418592	ADP SIGNALLING THROUGH P2Y PURINOCEPTOR 1%REACTOME DATABASE ID RELEASE 57%418592		23	0.408049	1.15158	0.269868	0.576183	1	1382	tags=22%, list=9%, signal=24%
HALLMARK_HEDGEHOG_SIGNALING%MSIGDB_C2%HALLMARK_HEDGEHOG_SIGNALING	HALLMARK_HEDGEHOG_SIGNALING%MSIGDB_C2%HALLMARK_HEDGEHOG_SIGNALING		35	0.368968	1.15157	0.247934	0.574721	1	3291	tags=31%, list=21%, signal=39%
FAS%IOB%FAS	FAS%IOB%FAS		107	0.302867	1.15141	0.201493	0.573718	1	2002	tags=22%, list=12%, signal=25%
HALLMARK_P53_PATHWAY%MSIGDB_C2%HALLMARK_P53_PATHWAY	HALLMARK_P53_PATHWAY%MSIGDB_C2%HALLMARK_P53_PATHWAY		185	0.284001	1.15021	0.163435	0.575616	1	2868	tags=22%, list=18%, signal=27%
TRAF6 MEDIATED IRF7 ACTIVATION%REACTOME DATABASE ID RELEASE 57%933541	TRAF6 MEDIATED IRF7 ACTIVATION%REACTOME DATABASE ID RELEASE 57%933541		20	0.419796	1.14899	0.266234	0.577595	1	2852	tags=40%, list=18%, signal=49%
PID_ARF6_TRAFFICKING_PATHWAY%MSIGDB_C2%PID_ARF6_TRAFFICKING_PATHWAY	PID_ARF6_TRAFFICKING_PATHWAY%MSIGDB_C2%PID_ARF6_TRAFFICKING_PATHWAY		45	0.345211	1.14778	0.247619	0.579605	1	3429	tags=27%, list=21%, signal=34%
PID_FOXO_PATHWAY%MSIGDB_C2%PID_FOXO_PATHWAY	PID_FOXO_PATHWAY%MSIGDB_C2%PID_FOXO_PATHWAY		46	0.34711	1.14744	0.25	0.579106	1	2445	tags=22%, list=15%, signal=26%
DEFECTIVE B3GAT3 CAUSES JDSSDHD%REACTOME DATABASE ID RELEASE 57%3560801	DEFECTIVE B3GAT3 CAUSES JDSSDHD%REACTOME DATABASE ID RELEASE 57%3560801		18	0.435487	1.14188	0.272727	0.593575	1	3822	tags=56%, list=24%, signal=73%
CARGO RECOGNITION FOR CLATHRIN-MEDIATED ENDOCYTOSIS%REACTOME%R-HSA-8856825.1	CARGO RECOGNITION FOR CLATHRIN-MEDIATED ENDOCYTOSIS%REACTOME%R-HSA-8856825.1		77	0.322958	1.14083	0.236842	0.595006	1	4353	tags=34%, list=27%, signal=46%
G BETA:GAMMA SIGNALLING THROUGH PLC BETA%REACTOME DATABASE ID RELEASE 57%418217	G BETA:GAMMA SIGNALLING THROUGH PLC BETA%REACTOME DATABASE ID RELEASE 57%418217		19	0.421625	1.14045	0.281924	0.59461	1	3472	tags=37%, list=22%, signal=47%
TOLL LIKE RECEPTOR 4 (TLR4) CASCADE%REACTOME%R-HSA-166016.1	TOLL LIKE RECEPTOR 4 (TLR4) CASCADE%REACTOME%R-HSA-166016.1		108	0.299872	1.13923	0.194715	0.596447	1	2800	tags=24%, list=17%, signal=29%
VALIDATED TRANSCRIPTIONAL TARGETS OF TAP63 ISOFORMS%PATHWAY INTERACTION DATABASE NCI-NATURE CURATED DATA%VALIDATED TRANSCRIPTIONAL TARGETS OF TAP63 ISOFORMS	VALIDATED TRANSCRIPTIONAL TARGETS OF TAP63 ISOFORMS%PATHWAY INTERACTION DATABASE NCI-NATURE CURATED DATA%VALIDATED TRANSCRIPTIONAL TARGETS OF TAP63 ISOFORMS		45	0.350267	1.13905	0.256098	0.595462	1	2947	tags=36%, list=18%, signal=43%
BIOCARTA_EPO_PATHWAY%MSIGDB_C2%BIOCARTA_EPO_PATHWAY	BIOCARTA_EPO_PATHWAY%MSIGDB_C2%BIOCARTA_EPO_PATHWAY		18	0.425272	1.13786	0.289286	0.597369	1	3117	tags=28%, list=19%, signal=34%
METAL ION SLC TRANSPORTERS%REACTOME%R-HSA-425410.1	METAL ION SLC TRANSPORTERS%REACTOME%R-HSA-425410.1		25	0.392186	1.13769	0.272142	0.596294	1	3619	tags=32%, list=23%, signal=41%
IL12 SIGNALING MEDIATED BY STAT4%PATHWAY INTERACTION DATABASE NCI-NATURE CURATED DATA%IL12 SIGNALING MEDIATED BY STAT4	IL12 SIGNALING MEDIATED BY STAT4%PATHWAY INTERACTION DATABASE NCI-NATURE CURATED DATA%IL12 SIGNALING MEDIATED BY STAT4		27	0.384189	1.13711	0.279534	0.596504	1	2678	tags=22%, list=17%, signal=27%
BIOCARTA_MYOSIN_PATHWAY%MSIGDB_C2%BIOCARTA_MYOSIN_PATHWAY	BIOCARTA_MYOSIN_PATHWAY%MSIGDB_C2%BIOCARTA_MYOSIN_PATHWAY		29	0.378529	1.13654	0.274797	0.596571	1	3488	tags=38%, list=22%, signal=48%
CLATHRIN-MEDIATED ENDOCYTOSIS%REACTOME%R-HSA-8856828.1	CLATHRIN-MEDIATED ENDOCYTOSIS%REACTOME%R-HSA-8856828.1		116	0.298869	1.13559	0.232323	0.5978	1	4353	tags=34%, list=27%, signal=46%
MYD88 DEPENDENT CASCADE INITIATED ON ENDOSOME%REACTOME%R-HSA-975155.1	MYD88 DEPENDENT CASCADE INITIATED ON ENDOSOME%REACTOME%R-HSA-975155.1		74	0.321654	1.13385	0.243789	0.601355	1	1768	tags=20%, list=11%, signal=23%
TOLL LIKE RECEPTOR 9 (TLR9) CASCADE%REACTOME DATABASE ID RELEASE 57%168138	TOLL LIKE RECEPTOR 9 (TLR9) CASCADE%REACTOME DATABASE ID RELEASE 57%168138		78	0.314604	1.13352	0.243363	0.600796	1	1768	tags=19%, list=11%, signal=22%
D-<I>MYO< I>-INOSITOL (1,4,5)-TRISPHOSPHATE BIOSYNTHESIS%HUMANCYC%PWY-6351	D-<I>MYO< I>-INOSITOL (1,4,5)-TRISPHOSPHATE BIOSYNTHESIS%HUMANCYC%PWY-6351		24	0.390931	1.13328	0.289517	0.599889	1	3472	tags=42%, list=22%, signal=53%
BIOCARTA_ALK_PATHWAY%MSIGDB_C2%BIOCARTA_ALK_PATHWAY	BIOCARTA_ALK_PATHWAY%MSIGDB_C2%BIOCARTA_ALK_PATHWAY		36	0.357155	1.13257	0.279146	0.600438	1	3328	tags=25%, list=21%, signal=31%
PID_P38_MKK3_6PATHWAY%MSIGDB_C2%PID_P38_MKK3_6PATHWAY	PID_P38_MKK3_6PATHWAY%MSIGDB_C2%PID_P38_MKK3_6PATHWAY		24	0.387701	1.13085	0.295161	0.603844	1	2338	tags=29%, list=15%, signal=34%
INTERNALIZATION OF ERBB1%PATHWAY INTERACTION DATABASE NCI-NATURE CURATED DATA%INTERNALIZATION OF ERBB1	INTERNALIZATION OF ERBB1%PATHWAY INTERACTION DATABASE NCI-NATURE CURATED DATA%INTERNALIZATION OF ERBB1		35	0.369669	1.13037	0.28433	0.603749	1	4049	tags=37%, list=25%, signal=50%
PID_TAP63_PATHWAY%MSIGDB_C2%PID_TAP63_PATHWAY	PID_TAP63_PATHWAY%MSIGDB_C2%PID_TAP63_PATHWAY		45	0.341857	1.12914	0.282012	0.605964	1	2947	tags=36%, list=18%, signal=43%
HETEROTRIMERIC G-PROTEIN SIGNALING PATHWAY-GQ ALPHA AND GO ALPHA MEDIATED PATHWAY%PANTHER PATHWAY%P00027	HETEROTRIMERIC G-PROTEIN SIGNALING PATHWAY-GQ ALPHA AND GO ALPHA MEDIATED PATHWAY%PANTHER PATHWAY%P00027		112	0.297648	1.12827	0.22853	0.606932	1	1513	tags=16%, list=9%, signal=18%
REGULATION OF IGF ACTIVITY BY IGFBP%REACTOME DATABASE ID RELEASE 57%381426	REGULATION OF IGF ACTIVITY BY IGFBP%REACTOME DATABASE ID RELEASE 57%381426		15	0.448135	1.12739	0.322795	0.607957	1	618	tags=13%, list=4%, signal=14%
FOXO FAMILY SIGNALING%PATHWAY INTERACTION DATABASE NCI-NATURE CURATED DATA%FOXO FAMILY SIGNALING	FOXO FAMILY SIGNALING%PATHWAY INTERACTION DATABASE NCI-NATURE CURATED DATA%FOXO FAMILY SIGNALING		46	0.34711	1.12709	0.257911	0.607369	1	2445	tags=22%, list=15%, signal=26%
CA-DEPENDENT EVENTS%REACTOME%R-HSA-111996.1	CA-DEPENDENT EVENTS%REACTOME%R-HSA-111996.1		26	0.38649	1.12703	0.291262	0.606047	1	3910	tags=46%, list=24%, signal=61%
BIOCARTA_GLEEVEC_PATHWAY%MSIGDB_C2%BIOCARTA_GLEEVEC_PATHWAY	BIOCARTA_GLEEVEC_PATHWAY%MSIGDB_C2%BIOCARTA_GLEEVEC_PATHWAY		23	0.401732	1.12694	0.32483	0.604832	1	1915	tags=22%, list=12%, signal=25%
NOTCH-MEDIATED HES HEY NETWORK%PATHWAY INTERACTION DATABASE NCI-NATURE CURATED DATA%NOTCH-MEDIATED HES HEY NETWORK	NOTCH-MEDIATED HES HEY NETWORK%PATHWAY INTERACTION DATABASE NCI-NATURE CURATED DATA%NOTCH-MEDIATED HES HEY NETWORK		45	0.344016	1.12683	0.259554	0.603712	1	4748	tags=38%, list=30%, signal=54%
L1CAM INTERACTIONS%REACTOME DATABASE ID RELEASE 57%373760	L1CAM INTERACTIONS%REACTOME DATABASE ID RELEASE 57%373760		87	0.308769	1.12663	0.229437	0.602782	1	5004	tags=48%, list=31%, signal=70%
BIOCARTA_TNFR1_PATHWAY%MSIGDB_C2%BIOCARTA_TNFR1_PATHWAY	BIOCARTA_TNFR1_PATHWAY%MSIGDB_C2%BIOCARTA_TNFR1_PATHWAY		29	0.373568	1.12638	0.276358	0.602068	1	2918	tags=28%, list=18%, signal=34%
CARBOHYDRATE METABOLISM%REACTOME%R-HSA-71387.5	CARBOHYDRATE METABOLISM%REACTOME%R-HSA-71387.5		235	0.271349	1.12628	0.1875	0.600933	1	3918	tags=31%, list=24%, signal=41%
INFLAMMATION MEDIATED BY CHEMOKINE AND CYTOKINE SIGNALING PATHWAY%PANTHER PATHWAY%P00031	INFLAMMATION MEDIATED BY CHEMOKINE AND CYTOKINE SIGNALING PATHWAY%PANTHER PATHWAY%P00031		170	0.280986	1.12626	0.191837	0.599543	1	4761	tags=38%, list=30%, signal=53%
TRAF6 MEDIATED INDUCTION OF PROINFLAMMATORY CYTOKINES%REACTOME%R-HSA-168180.1	TRAF6 MEDIATED INDUCTION OF PROINFLAMMATORY CYTOKINES%REACTOME%R-HSA-168180.1		62	0.320439	1.12564	0.248062	0.599848	1	1734	tags=19%, list=11%, signal=22%
ACTIVATED TLR4 SIGNALLING%REACTOME%R-HSA-166054.1	ACTIVATED TLR4 SIGNALLING%REACTOME%R-HSA-166054.1		100	0.296694	1.12498	0.252482	0.600298	1	2572	tags=23%, list=16%, signal=27%
ROLE OF PHOSPHOLIPIDS IN PHAGOCYTOSIS%REACTOME DATABASE ID RELEASE 57%2029485	ROLE OF PHOSPHOLIPIDS IN PHAGOCYTOSIS%REACTOME DATABASE ID RELEASE 57%2029485		18	0.422969	1.12425	0.30137	0.600894	1	887	tags=17%, list=6%, signal=18%
HISTIDINE, LYSINE, PHENYLALANINE, TYROSINE, PROLINE AND TRYPTOPHAN CATABOLISM%REACTOME DATABASE ID RELEASE 57%6788656	HISTIDINE, LYSINE, PHENYLALANINE, TYROSINE, PROLINE AND TRYPTOPHAN CATABOLISM%REACTOME DATABASE ID RELEASE 57%6788656		40	0.356094	1.12322	0.28278	0.602384	1	3576	tags=35%, list=22%, signal=45%
ALK1 SIGNALING EVENTS%PATHWAY INTERACTION DATABASE NCI-NATURE CURATED DATA%ALK1 SIGNALING EVENTS	ALK1 SIGNALING EVENTS%PATHWAY INTERACTION DATABASE NCI-NATURE CURATED DATA%ALK1 SIGNALING EVENTS		25	0.381788	1.1231	0.304207	0.601263	1	3219	tags=36%, list=20%, signal=45%
SLC-MEDIATED TRANSMEMBRANE TRANSPORT%REACTOME%R-HSA-425407.1	SLC-MEDIATED TRANSMEMBRANE TRANSPORT%REACTOME%R-HSA-425407.1		239	0.270945	1.12257	0.203871	0.601275	1	3685	tags=27%, list=23%, signal=34%
HISTAMINE H1 RECEPTOR MEDIATED SIGNALING PATHWAY%PANTHER PATHWAY%P04385	HISTAMINE H1 RECEPTOR MEDIATED SIGNALING PATHWAY%PANTHER PATHWAY%P04385		39	0.348589	1.12187	0.282392	0.601958	1	3626	tags=38%, list=23%, signal=50%
NOTCH SIGNALING PATHWAY%PANTHER PATHWAY%P00045	NOTCH SIGNALING PATHWAY%PANTHER PATHWAY%P00045		28	0.381469	1.12012	0.307179	0.605315	1	2995	tags=32%, list=19%, signal=39%
ENDOGENOUS_CANNABINOID_SIGNALING%PANTHER PATHWAY%P05730	ENDOGENOUS_CANNABINOID_SIGNALING%PANTHER PATHWAY%P05730		22	0.401875	1.11978	0.314476	0.604891	1	3804	tags=41%, list=24%, signal=54%
NOTCH SIGNALING PATHWAY%PATHWAY INTERACTION DATABASE NCI-NATURE CURATED DATA%NOTCH SIGNALING PATHWAY	NOTCH SIGNALING PATHWAY%PATHWAY INTERACTION DATABASE NCI-NATURE CURATED DATA%NOTCH SIGNALING PATHWAY		51	0.334903	1.11942	0.27454	0.60451	1	3483	tags=33%, list=22%, signal=42%
GLUCAGON-TYPE LIGAND RECEPTORS%REACTOME DATABASE ID RELEASE 57%420092	GLUCAGON-TYPE LIGAND RECEPTORS%REACTOME DATABASE ID RELEASE 57%420092		27	0.381139	1.11923	0.317742	0.603683	1	1382	tags=15%, list=9%, signal=16%
PID_ERBB1_INTERNALIZATION_PATHWAY%MSIGDB_C2%PID_ERBB1_INTERNALIZATION_PATHWAY	PID_ERBB1_INTERNALIZATION_PATHWAY%MSIGDB_C2%PID_ERBB1_INTERNALIZATION_PATHWAY		37	0.354275	1.11913	0.293839	0.602471	1	4049	tags=38%, list=25%, signal=51%
SA_B_CELL_RECEPTOR_COMPLEXES%MSIGDB_C2%SA_B_CELL_RECEPTOR_COMPLEXES	SA_B_CELL_RECEPTOR_COMPLEXES%MSIGDB_C2%SA_B_CELL_RECEPTOR_COMPLEXES		24	0.393966	1.11675	0.307432	0.607633	1	3117	tags=25%, list=19%, signal=31%
PID_WNT_NONCANONICAL_PATHWAY%MSIGDB_C2%PID_WNT_NONCANONICAL_PATHWAY	PID_WNT_NONCANONICAL_PATHWAY%MSIGDB_C2%PID_WNT_NONCANONICAL_PATHWAY		30	0.364217	1.11586	0.308917	0.608848	1	3561	tags=37%, list=22%, signal=47%
BIOCARTA_PAR1_PATHWAY%MSIGDB_C2%BIOCARTA_PAR1_PATHWAY	BIOCARTA_PAR1_PATHWAY%MSIGDB_C2%BIOCARTA_PAR1_PATHWAY		34	0.363979	1.11519	0.293423	0.609354	1	3397	tags=32%, list=21%, signal=41%
SIGNAL AMPLIFICATION%REACTOME DATABASE ID RELEASE 57%392518	SIGNAL AMPLIFICATION%REACTOME DATABASE ID RELEASE 57%392518		30	0.369639	1.11497	0.296296	0.608524	1	2982	tags=27%, list=19%, signal=33%
VEGFA-VEGFR2 PATHWAY%REACTOME%R-HSA-4420097.2	VEGFA-VEGFR2 PATHWAY%REACTOME%R-HSA-4420097.2		273	0.262465	1.1135	0.211125	0.611291	1	2338	tags=19%, list=15%, signal=21%
GASTRIN-CREB SIGNALLING PATHWAY VIA PKC AND MAPK%REACTOME%R-HSA-881907.1	GASTRIN-CREB SIGNALLING PATHWAY VIA PKC AND MAPK%REACTOME%R-HSA-881907.1		371	0.254577	1.11173	0.171004	0.614754	1	2420	tags=18%, list=15%, signal=21%
PDGFR-ALPHA SIGNALING PATHWAY%PATHWAY INTERACTION DATABASE NCI-NATURE CURATED DATA%PDGFR-ALPHA SIGNALING PATHWAY	PDGFR-ALPHA SIGNALING PATHWAY%PATHWAY INTERACTION DATABASE NCI-NATURE CURATED DATA%PDGFR-ALPHA SIGNALING PATHWAY		19	0.411216	1.11104	0.32409	0.615348	1	2142	tags=32%, list=13%, signal=36%
FCERI MEDIATED MAPK ACTIVATION%REACTOME DATABASE ID RELEASE 57%2871796	FCERI MEDIATED MAPK ACTIVATION%REACTOME DATABASE ID RELEASE 57%2871796		214	0.271258	1.11077	0.218833	0.614717	1	2338	tags=20%, list=15%, signal=23%
APOPTOTIC EXECUTION PHASE%REACTOME DATABASE ID RELEASE 57%75153	APOPTOTIC EXECUTION PHASE%REACTOME DATABASE ID RELEASE 57%75153		43	0.346105	1.10884	0.310016	0.618565	1	3115	tags=28%, list=19%, signal=35%
FGF SIGNALING PATHWAY%PANTHER PATHWAY%P00021	FGF SIGNALING PATHWAY%PANTHER PATHWAY%P00021		94	0.298717	1.10794	0.273669	0.619722	1	2468	tags=20%, list=15%, signal=24%
BIOCARTA_MET_PATHWAY%MSIGDB_C2%BIOCARTA_MET_PATHWAY	BIOCARTA_MET_PATHWAY%MSIGDB_C2%BIOCARTA_MET_PATHWAY		36	0.355067	1.10597	0.310789	0.623603	1	3167	tags=31%, list=20%, signal=38%
RHO GTPASES ACTIVATE WASPS AND WAVES%REACTOME DATABASE ID RELEASE 57%5663213	RHO GTPASES ACTIVATE WASPS AND WAVES%REACTOME DATABASE ID RELEASE 57%5663213		33	0.365636	1.10542	0.315436	0.623786	1	4541	tags=33%, list=28%, signal=46%
ST_FAS_SIGNALING_PATHWAY%MSIGDB_C2%ST_FAS_SIGNALING_PATHWAY	ST_FAS_SIGNALING_PATHWAY%MSIGDB_C2%ST_FAS_SIGNALING_PATHWAY		58	0.322854	1.10325	0.275229	0.62851	1	1906	tags=22%, list=12%, signal=25%
DEFECTIVE B3GALTL CAUSES PETERS-PLUS SYNDROME (PPS)%REACTOME DATABASE ID RELEASE 57%5083635	DEFECTIVE B3GALTL CAUSES PETERS-PLUS SYNDROME (PPS)%REACTOME DATABASE ID RELEASE 57%5083635		35	0.353197	1.10314	0.292332	0.62742	1	4009	tags=40%, list=25%, signal=53%
NEPHRIN NEPH1 SIGNALING IN THE KIDNEY PODOCYTE%PATHWAY INTERACTION DATABASE NCI-NATURE CURATED DATA%NEPHRIN NEPH1 SIGNALING IN THE KIDNEY PODOCYTE	NEPHRIN NEPH1 SIGNALING IN THE KIDNEY PODOCYTE%PATHWAY INTERACTION DATABASE NCI-NATURE CURATED DATA%NEPHRIN NEPH1 SIGNALING IN THE KIDNEY PODOCYTE		28	0.369187	1.10156	0.338435	0.630578	1	2338	tags=29%, list=15%, signal=33%
PID_ALK1_PATHWAY%MSIGDB_C2%PID_ALK1_PATHWAY	PID_ALK1_PATHWAY%MSIGDB_C2%PID_ALK1_PATHWAY		25	0.381788	1.10087	0.292962	0.6311	1	3219	tags=36%, list=20%, signal=45%
BIOCARTA_IL2RB_PATHWAY%MSIGDB_C2%BIOCARTA_IL2RB_PATHWAY	BIOCARTA_IL2RB_PATHWAY%MSIGDB_C2%BIOCARTA_IL2RB_PATHWAY		35	0.360111	1.09968	0.327613	0.632967	1	770	tags=11%, list=5%, signal=12%
PID_FCER1_PATHWAY%MSIGDB_C2%PID_FCER1_PATHWAY	PID_FCER1_PATHWAY%MSIGDB_C2%PID_FCER1_PATHWAY		57	0.319784	1.098	0.313364	0.636215	1	1292	tags=18%, list=8%, signal=19%
PID_S1P_S1P2_PATHWAY%MSIGDB_C2%PID_S1P_S1P2_PATHWAY	PID_S1P_S1P2_PATHWAY%MSIGDB_C2%PID_S1P_S1P2_PATHWAY		23	0.387025	1.09783	0.314145	0.635324	1	2982	tags=26%, list=19%, signal=32%
5HT2 TYPE RECEPTOR MEDIATED SIGNALING PATHWAY%PANTHER PATHWAY%P04374	5HT2 TYPE RECEPTOR MEDIATED SIGNALING PATHWAY%PANTHER PATHWAY%P04374		44	0.335275	1.09777	0.283988	0.634093	1	3626	tags=36%, list=23%, signal=47%
P38 MAPK SIGNALING PATHWAY%PATHWAY INTERACTION DATABASE NCI-NATURE CURATED DATA%P38 MAPK SIGNALING PATHWAY	P38 MAPK SIGNALING PATHWAY%PATHWAY INTERACTION DATABASE NCI-NATURE CURATED DATA%P38 MAPK SIGNALING PATHWAY		24	0.387701	1.09742	0.336538	0.633706	1	2338	tags=29%, list=15%, signal=34%
TRANSPORT OF GLUCOSE AND OTHER SUGARS, BILE SALTS AND ORGANIC ACIDS, METAL IONS AND AMINE COMPOUNDS%REACTOME DATABASE ID RELEASE 57%425366	TRANSPORT OF GLUCOSE AND OTHER SUGARS, BILE SALTS AND ORGANIC ACIDS, METAL IONS AND AMINE COMPOUNDS%REACTOME DATABASE ID RELEASE 57%425366		93	0.297674	1.09592	0.298883	0.636409	1	1871	tags=17%, list=12%, signal=19%
FGFR1 MUTANT RECEPTOR ACTIVATION%REACTOME DATABASE ID RELEASE 57%1839124	FGFR1 MUTANT RECEPTOR ACTIVATION%REACTOME DATABASE ID RELEASE 57%1839124		25	0.380989	1.09566	0.322204	0.635796	1	2462	tags=28%, list=15%, signal=33%
HALLMARK_CHOLESTEROL_HOMEOSTASIS%MSIGDB_C2%HALLMARK_CHOLESTEROL_HOMEOSTASIS	HALLMARK_CHOLESTEROL_HOMEOSTASIS%MSIGDB_C2%HALLMARK_CHOLESTEROL_HOMEOSTASIS		67	0.313269	1.09477	0.312769	0.636881	1	4102	tags=39%, list=26%, signal=52%
PNAT%PANTHER PATHWAY%P05912	PNAT%PANTHER PATHWAY%P05912		45	0.336193	1.09217	0.331783	0.642768	1	1382	tags=18%, list=9%, signal=19%
INTERFERON GAMMA SIGNALING%REACTOME DATABASE ID RELEASE 57%877300	INTERFERON GAMMA SIGNALING%REACTOME DATABASE ID RELEASE 57%877300		57	0.317511	1.09071	0.320574	0.645497	1	2863	tags=26%, list=18%, signal=32%
NONCANONICAL WNT SIGNALING PATHWAY%PATHWAY INTERACTION DATABASE NCI-NATURE CURATED DATA%NONCANONICAL WNT SIGNALING PATHWAY	NONCANONICAL WNT SIGNALING PATHWAY%PATHWAY INTERACTION DATABASE NCI-NATURE CURATED DATA%NONCANONICAL WNT SIGNALING PATHWAY		30	0.364217	1.09071	0.319218	0.644092	1	3561	tags=37%, list=22%, signal=47%
S1P2 PATHWAY%PATHWAY INTERACTION DATABASE NCI-NATURE CURATED DATA%S1P2 PATHWAY	S1P2 PATHWAY%PATHWAY INTERACTION DATABASE NCI-NATURE CURATED DATA%S1P2 PATHWAY		23	0.387025	1.0899	0.339496	0.645064	1	2982	tags=26%, list=19%, signal=32%
O-LINKED GLYCOSYLATION OF MUCINS%REACTOME%R-HSA-913709.3	O-LINKED GLYCOSYLATION OF MUCINS%REACTOME%R-HSA-913709.3		46	0.333373	1.08865	0.319759	0.647252	1	4680	tags=46%, list=29%, signal=64%
SIGNALING BY EGFR%REACTOME%R-HSA-177929.1	SIGNALING BY EGFR%REACTOME%R-HSA-177929.1		300	0.258162	1.08851	0.241855	0.64622	1	2318	tags=19%, list=14%, signal=22%
HALLMARK_ESTROGEN_RESPONSE_LATE%MSIGDB_C2%HALLMARK_ESTROGEN_RESPONSE_LATE	HALLMARK_ESTROGEN_RESPONSE_LATE%MSIGDB_C2%HALLMARK_ESTROGEN_RESPONSE_LATE		182	0.271436	1.0872	0.271487	0.648583	1	2847	tags=23%, list=18%, signal=28%
PID_IFNG_PATHWAY%MSIGDB_C2%PID_IFNG_PATHWAY	PID_IFNG_PATHWAY%MSIGDB_C2%PID_IFNG_PATHWAY		40	0.336065	1.08413	0.336554	0.655988	1	2678	tags=28%, list=17%, signal=33%
VEGFR3 SIGNALING IN LYMPHATIC ENDOTHELIUM%PATHWAY INTERACTION DATABASE NCI-NATURE CURATED DATA%VEGFR3 SIGNALING IN LYMPHATIC ENDOTHELIUM	VEGFR3 SIGNALING IN LYMPHATIC ENDOTHELIUM%PATHWAY INTERACTION DATABASE NCI-NATURE CURATED DATA%VEGFR3 SIGNALING IN LYMPHATIC ENDOTHELIUM		25	0.36598	1.08221	0.355155	0.660027	1	122	tags=8%, list=1%, signal=8%
BIOCARTA_INFLAM_PATHWAY%MSIGDB_C2%BIOCARTA_INFLAM_PATHWAY	BIOCARTA_INFLAM_PATHWAY%MSIGDB_C2%BIOCARTA_INFLAM_PATHWAY		24	0.385744	1.08207	0.355	0.658992	1	4441	tags=33%, list=28%, signal=46%
SIGNALING BY VEGF%REACTOME DATABASE ID RELEASE 57%194138	SIGNALING BY VEGF%REACTOME DATABASE ID RELEASE 57%194138		282	0.25754	1.08158	0.272843	0.658929	1	2338	tags=18%, list=15%, signal=21%
DAP12 SIGNALING%REACTOME DATABASE ID RELEASE 57%2424491	DAP12 SIGNALING%REACTOME DATABASE ID RELEASE 57%2424491		294	0.25335	1.08147	0.270781	0.657802	1	2338	tags=19%, list=15%, signal=22%
ST_JNK_MAPK_PATHWAY%MSIGDB_C2%ST_JNK_MAPK_PATHWAY	ST_JNK_MAPK_PATHWAY%MSIGDB_C2%ST_JNK_MAPK_PATHWAY		37	0.346775	1.08075	0.340524	0.658483	1	1929	tags=22%, list=12%, signal=25%
SIGNALING BY FGFR4%REACTOME%R-HSA-5654743.2	SIGNALING BY FGFR4%REACTOME%R-HSA-5654743.2		284	0.256031	1.08032	0.256281	0.65828	1	2318	tags=19%, list=14%, signal=22%
GLUTAMATE BINDING, ACTIVATION OF AMPA RECEPTORS AND SYNAPTIC PLASTICITY%REACTOME DATABASE ID RELEASE 57%399721	GLUTAMATE BINDING, ACTIVATION OF AMPA RECEPTORS AND SYNAPTIC PLASTICITY%REACTOME DATABASE ID RELEASE 57%399721		25	0.370658	1.08031	0.351171	0.656895	1	3626	tags=44%, list=23%, signal=57%
RET SIGNALING%REACTOME%R-HSA-8853659.1	RET SIGNALING%REACTOME%R-HSA-8853659.1		217	0.261882	1.07907	0.278447	0.659037	1	2318	tags=20%, list=14%, signal=23%
ALZHEIMER DISEASE-AMYLOID SECRETASE PATHWAY%PANTHER PATHWAY%P00003	ALZHEIMER DISEASE-AMYLOID SECRETASE PATHWAY%PANTHER PATHWAY%P00003		60	0.310399	1.07888	0.336493	0.658134	1	3705	tags=30%, list=23%, signal=39%
SIGNALING BY FGFR3 IN DISEASE%REACTOME%R-HSA-5655332.2	SIGNALING BY FGFR3 IN DISEASE%REACTOME%R-HSA-5655332.2		18	0.396688	1.07862	0.356792	0.657499	1	1929	tags=22%, list=12%, signal=25%
PID_IL12_STAT4_PATHWAY%MSIGDB_C2%PID_IL12_STAT4_PATHWAY	PID_IL12_STAT4_PATHWAY%MSIGDB_C2%PID_IL12_STAT4_PATHWAY		29	0.360276	1.07833	0.329636	0.656943	1	2678	tags=21%, list=17%, signal=25%
PID_AJDISS_2PATHWAY%MSIGDB_C2%PID_AJDISS_2PATHWAY	PID_AJDISS_2PATHWAY%MSIGDB_C2%PID_AJDISS_2PATHWAY		45	0.325425	1.078	0.341853	0.656478	1	3177	tags=24%, list=20%, signal=30%
IFN-GAMMA PATHWAY%PATHWAY INTERACTION DATABASE NCI-NATURE CURATED DATA%IFN-GAMMA PATHWAY	IFN-GAMMA PATHWAY%PATHWAY INTERACTION DATABASE NCI-NATURE CURATED DATA%IFN-GAMMA PATHWAY		40	0.336065	1.07618	0.335473	0.660412	1	2678	tags=28%, list=17%, signal=33%
PID_HES_HEY_PATHWAY%MSIGDB_C2%PID_HES_HEY_PATHWAY	PID_HES_HEY_PATHWAY%MSIGDB_C2%PID_HES_HEY_PATHWAY		46	0.331032	1.07573	0.341137	0.660314	1	4748	tags=37%, list=30%, signal=52%
ACTIVATION OF KAINATE RECEPTORS UPON GLUTAMATE BINDING%REACTOME DATABASE ID RELEASE 57%451326	ACTIVATION OF KAINATE RECEPTORS UPON GLUTAMATE BINDING%REACTOME DATABASE ID RELEASE 57%451326		28	0.366752	1.07456	0.355848	0.662266	1	3553	tags=36%, list=22%, signal=46%
HALLMARK_MITOTIC_SPINDLE%MSIGDB_C2%HALLMARK_MITOTIC_SPINDLE	HALLMARK_MITOTIC_SPINDLE%MSIGDB_C2%HALLMARK_MITOTIC_SPINDLE		186	0.267043	1.07437	0.304172	0.661446	1	4512	tags=30%, list=28%, signal=41%
MAP2K AND MAPK ACTIVATION%REACTOME DATABASE ID RELEASE 57%5674135	MAP2K AND MAPK ACTIVATION%REACTOME DATABASE ID RELEASE 57%5674135		32	0.347602	1.07394	0.341232	0.661236	1	1921	tags=22%, list=12%, signal=25%
RHO GTPASES ACTIVATE PAKS%REACTOME%R-HSA-5627123.1	RHO GTPASES ACTIVATE PAKS%REACTOME%R-HSA-5627123.1		19	0.398505	1.07368	0.359143	0.660648	1	3488	tags=37%, list=22%, signal=47%
SIGNALING BY ROBO RECEPTOR%REACTOME DATABASE ID RELEASE 57%376176	SIGNALING BY ROBO RECEPTOR%REACTOME DATABASE ID RELEASE 57%376176		28	0.362019	1.07242	0.338333	0.662931	1	3788	tags=32%, list=24%, signal=42%
PHASE 1 - FUNCTIONALIZATION OF COMPOUNDS%REACTOME DATABASE ID RELEASE 57%211945	PHASE 1 - FUNCTIONALIZATION OF COMPOUNDS%REACTOME DATABASE ID RELEASE 57%211945		59	0.309393	1.07223	0.305085	0.662124	1	5164	tags=49%, list=32%, signal=72%
TRAF6 MEDIATED NF-KB ACTIVATION%REACTOME DATABASE ID RELEASE 57%933542	TRAF6 MEDIATED NF-KB ACTIVATION%REACTOME DATABASE ID RELEASE 57%933542		21	0.391569	1.07183	0.373737	0.661837	1	3201	tags=48%, list=20%, signal=59%
SIGNALING BY FGFR3%REACTOME%R-HSA-5654741.2	SIGNALING BY FGFR3%REACTOME%R-HSA-5654741.2		285	0.254937	1.07163	0.275159	0.660962	1	2318	tags=19%, list=14%, signal=22%
SIGNALING MEDIATED BY P38-ALPHA AND P38-BETA%PATHWAY INTERACTION DATABASE NCI-NATURE CURATED DATA%SIGNALING MEDIATED BY P38-ALPHA AND P38-BETA	SIGNALING MEDIATED BY P38-ALPHA AND P38-BETA%PATHWAY INTERACTION DATABASE NCI-NATURE CURATED DATA%SIGNALING MEDIATED BY P38-ALPHA AND P38-BETA		32	0.356052	1.07157	0.344013	0.659739	1	1572	tags=19%, list=10%, signal=21%
ACTIVATED NOTCH1 TRANSMITS SIGNAL TO THE NUCLEUS%REACTOME DATABASE ID RELEASE 57%2122948	ACTIVATED NOTCH1 TRANSMITS SIGNAL TO THE NUCLEUS%REACTOME DATABASE ID RELEASE 57%2122948		22	0.386319	1.07157	0.380875	0.658395	1	2537	tags=27%, list=16%, signal=32%
HSF1-DEPENDENT TRANSACTIVATION%REACTOME%R-HSA-3371571.1	HSF1-DEPENDENT TRANSACTIVATION%REACTOME%R-HSA-3371571.1		20	0.39127	1.07066	0.353952	0.659583	1	2585	tags=25%, list=16%, signal=30%
REGULATION OF RHOA ACTIVITY%PATHWAY INTERACTION DATABASE NCI-NATURE CURATED DATA%REGULATION OF RHOA ACTIVITY	REGULATION OF RHOA ACTIVITY%PATHWAY INTERACTION DATABASE NCI-NATURE CURATED DATA%REGULATION OF RHOA ACTIVITY		41	0.332892	1.06987	0.346093	0.660419	1	5087	tags=46%, list=32%, signal=68%
PID_PDGFRA_PATHWAY%MSIGDB_C2%PID_PDGFRA_PATHWAY	PID_PDGFRA_PATHWAY%MSIGDB_C2%PID_PDGFRA_PATHWAY		20	0.391865	1.0691	0.368421	0.661335	1	2142	tags=30%, list=13%, signal=35%
PID_RHOA_REG_PATHWAY%MSIGDB_C2%PID_RHOA_REG_PATHWAY	PID_RHOA_REG_PATHWAY%MSIGDB_C2%PID_RHOA_REG_PATHWAY		41	0.332892	1.06862	0.347826	0.66136	1	5087	tags=46%, list=32%, signal=68%
HIF-1-ALPHA TRANSCRIPTION FACTOR NETWORK%PATHWAY INTERACTION DATABASE NCI-NATURE CURATED DATA%HIF-1-ALPHA TRANSCRIPTION FACTOR NETWORK	HIF-1-ALPHA TRANSCRIPTION FACTOR NETWORK%PATHWAY INTERACTION DATABASE NCI-NATURE CURATED DATA%HIF-1-ALPHA TRANSCRIPTION FACTOR NETWORK		55	0.312757	1.06813	0.343168	0.661403	1	4670	tags=36%, list=29%, signal=51%
DAP12 INTERACTIONS%REACTOME%R-HSA-2172127.1	DAP12 INTERACTIONS%REACTOME%R-HSA-2172127.1		299	0.251186	1.06784	0.300518	0.660871	1	2338	tags=19%, list=15%, signal=22%
IL8- AND CXCR1-MEDIATED SIGNALING EVENTS%PATHWAY INTERACTION DATABASE NCI-NATURE CURATED DATA%IL8- AND CXCR1-MEDIATED SIGNALING EVENTS	IL8- AND CXCR1-MEDIATED SIGNALING EVENTS%PATHWAY INTERACTION DATABASE NCI-NATURE CURATED DATA%IL8- AND CXCR1-MEDIATED SIGNALING EVENTS		27	0.358629	1.06586	0.373534	0.664893	1	1921	tags=22%, list=12%, signal=25%
BIOCARTA_TOB1_PATHWAY%MSIGDB_C2%BIOCARTA_TOB1_PATHWAY	BIOCARTA_TOB1_PATHWAY%MSIGDB_C2%BIOCARTA_TOB1_PATHWAY		18	0.401614	1.0647	0.359935	0.666756	1	5376	tags=56%, list=34%, signal=83%
DOWNSTREAM SIGNALING OF ACTIVATED FGFR3%REACTOME DATABASE ID RELEASE 57%5654708	DOWNSTREAM SIGNALING OF ACTIVATED FGFR3%REACTOME DATABASE ID RELEASE 57%5654708		281	0.247637	1.06333	0.288265	0.669283	1	2318	tags=19%, list=14%, signal=22%
NITRIC OXIDE STIMULATES GUANYLATE CYCLASE%REACTOME DATABASE ID RELEASE 57%392154	NITRIC OXIDE STIMULATES GUANYLATE CYCLASE%REACTOME DATABASE ID RELEASE 57%392154		20	0.385881	1.06286	0.395387	0.669256	1	1089	tags=25%, list=7%, signal=27%
TSLP%NETPATH%TSLP	TSLP%NETPATH%TSLP		146	0.269382	1.06245	0.326241	0.669123	1	3594	tags=31%, list=22%, signal=39%
MEIOTIC SYNAPSIS%REACTOME%R-HSA-1221632.1	MEIOTIC SYNAPSIS%REACTOME%R-HSA-1221632.1		36	0.339011	1.06197	0.355263	0.66917	1	1917	tags=19%, list=12%, signal=22%
PID_NEPHRIN_NEPH1_PATHWAY%MSIGDB_C2%PID_NEPHRIN_NEPH1_PATHWAY	PID_NEPHRIN_NEPH1_PATHWAY%MSIGDB_C2%PID_NEPHRIN_NEPH1_PATHWAY		30	0.34426	1.06045	0.375415	0.672053	1	3117	tags=33%, list=19%, signal=41%
ACYL CHAIN REMODELLING OF PE%REACTOME DATABASE ID RELEASE 57%1482839	ACYL CHAIN REMODELLING OF PE%REACTOME DATABASE ID RELEASE 57%1482839		25	0.370464	1.06006	0.385399	0.671819	1	3068	tags=32%, list=19%, signal=40%
PID_AR_TF_PATHWAY%MSIGDB_C2%PID_AR_TF_PATHWAY	PID_AR_TF_PATHWAY%MSIGDB_C2%PID_AR_TF_PATHWAY		48	0.318161	1.05994	0.352273	0.670808	1	3239	tags=27%, list=20%, signal=34%
STEROID HORMONES%REACTOME DATABASE ID RELEASE 57%209943	STEROID HORMONES%REACTOME DATABASE ID RELEASE 57%209943		30	0.347079	1.0598	0.354132	0.669853	1	4701	tags=43%, list=29%, signal=61%
S1P3 PATHWAY%PATHWAY INTERACTION DATABASE NCI-NATURE CURATED DATA%S1P3 PATHWAY	S1P3 PATHWAY%PATHWAY INTERACTION DATABASE NCI-NATURE CURATED DATA%S1P3 PATHWAY		24	0.374326	1.05965	0.393333	0.668939	1	3167	tags=33%, list=20%, signal=41%
INACTIVATION, RECOVERY AND REGULATION OF THE PHOTOTRANSDUCTION CASCADE%REACTOME DATABASE ID RELEASE 57%2514859	INACTIVATION, RECOVERY AND REGULATION OF THE PHOTOTRANSDUCTION CASCADE%REACTOME DATABASE ID RELEASE 57%2514859		25	0.36818	1.05922	0.386581	0.668813	1	802	tags=16%, list=5%, signal=17%
PID_HIF1_TFPATHWAY%MSIGDB_C2%PID_HIF1_TFPATHWAY	PID_HIF1_TFPATHWAY%MSIGDB_C2%PID_HIF1_TFPATHWAY		55	0.312757	1.05867	0.355346	0.66907	1	4670	tags=36%, list=29%, signal=51%
SIGNALING BY FGFR3 POINT MUTANTS IN CANCER%REACTOME DATABASE ID RELEASE 57%8853338	SIGNALING BY FGFR3 POINT MUTANTS IN CANCER%REACTOME DATABASE ID RELEASE 57%8853338		18	0.396688	1.05853	0.410084	0.66811	1	1929	tags=22%, list=12%, signal=25%
TRAFFICKING OF AMPA RECEPTORS%REACTOME%R-HSA-399719.1	TRAFFICKING OF AMPA RECEPTORS%REACTOME%R-HSA-399719.1		25	0.370658	1.05774	0.38126	0.669109	1	3626	tags=44%, list=23%, signal=57%
PDGF SIGNALING PATHWAY%PANTHER PATHWAY%P00047	PDGF SIGNALING PATHWAY%PANTHER PATHWAY%P00047		114	0.280478	1.0556	0.356436	0.6738	1	3964	tags=32%, list=25%, signal=42%
DOWNSTREAM SIGNAL TRANSDUCTION%REACTOME%R-HSA-186763.1	DOWNSTREAM SIGNAL TRANSDUCTION%REACTOME%R-HSA-186763.1		293	0.24794	1.05495	0.30401	0.674297	1	2318	tags=19%, list=14%, signal=22%
INTERLEUKIN-3, 5 AND GM-CSF SIGNALING%REACTOME DATABASE ID RELEASE 57%512988	INTERLEUKIN-3, 5 AND GM-CSF SIGNALING%REACTOME DATABASE ID RELEASE 57%512988		220	0.256001	1.05464	0.331558	0.673854	1	2318	tags=20%, list=14%, signal=23%
POSTTRANSLATIONAL REGULATION OF ADHERENS JUNCTION STABILITY AND DISSASSEMBLY%PATHWAY INTERACTION DATABASE NCI-NATURE CURATED DATA%POSTTRANSLATIONAL REGULATION OF ADHERENS JUNCTION STABILITY AND DISSASSEMBLY	POSTTRANSLATIONAL REGULATION OF ADHERENS JUNCTION STABILITY AND DISSASSEMBLY%PATHWAY INTERACTION DATABASE NCI-NATURE CURATED DATA%POSTTRANSLATIONAL REGULATION OF ADHERENS JUNCTION STABILITY AND DISSASSEMBLY		45	0.325425	1.05377	0.376206	0.674914	1	3177	tags=24%, list=20%, signal=30%
REGULATION OF ANDROGEN RECEPTOR ACTIVITY%PATHWAY INTERACTION DATABASE NCI-NATURE CURATED DATA%REGULATION OF ANDROGEN RECEPTOR ACTIVITY	REGULATION OF ANDROGEN RECEPTOR ACTIVITY%PATHWAY INTERACTION DATABASE NCI-NATURE CURATED DATA%REGULATION OF ANDROGEN RECEPTOR ACTIVITY		48	0.31816	1.05313	0.38141	0.675364	1	3239	tags=27%, list=20%, signal=34%
VEGFR2 MEDIATED CELL PROLIFERATION%REACTOME DATABASE ID RELEASE 57%5218921	VEGFR2 MEDIATED CELL PROLIFERATION%REACTOME DATABASE ID RELEASE 57%5218921		207	0.253904	1.05304	0.336884	0.674281	1	2318	tags=19%, list=14%, signal=22%
SIGNALING BY LEPTIN%REACTOME DATABASE ID RELEASE 57%2586552	SIGNALING BY LEPTIN%REACTOME DATABASE ID RELEASE 57%2586552		201	0.257308	1.05291	0.341238	0.673334	1	2585	tags=20%, list=16%, signal=24%
SIGNALING BY NGF%REACTOME DATABASE ID RELEASE 57%166520	SIGNALING BY NGF%REACTOME DATABASE ID RELEASE 57%166520		396	0.242199	1.05287	0.318021	0.672139	1	2585	tags=20%, list=16%, signal=23%
WNT_SIGNALING%MSIGDB_C2%WNT_SIGNALING	WNT_SIGNALING%MSIGDB_C2%WNT_SIGNALING		84	0.286215	1.05234	0.377305	0.672334	1	3540	tags=31%, list=22%, signal=40%
ACTIVATION OF GENE EXPRESSION BY SREBF (SREBP)%REACTOME DATABASE ID RELEASE 57%2426168	ACTIVATION OF GENE EXPRESSION BY SREBF (SREBP)%REACTOME DATABASE ID RELEASE 57%2426168		35	0.341246	1.05131	0.384491	0.673939	1	1799	tags=20%, list=11%, signal=22%
METABOLISM OF FAT-SOLUBLE VITAMINS%REACTOME DATABASE ID RELEASE 57%6806667	METABOLISM OF FAT-SOLUBLE VITAMINS%REACTOME DATABASE ID RELEASE 57%6806667		43	0.323976	1.05125	0.368259	0.672782	1	4195	tags=35%, list=26%, signal=47%
AXON GUIDANCE MEDIATED BY SLIT ROBO%PANTHER PATHWAY%P00008	AXON GUIDANCE MEDIATED BY SLIT ROBO%PANTHER PATHWAY%P00008		16	0.410062	1.05125	0.391089	0.671493	1	2811	tags=50%, list=18%, signal=61%
PID_LYMPH_ANGIOGENESIS_PATHWAY%MSIGDB_C2%PID_LYMPH_ANGIOGENESIS_PATHWAY	PID_LYMPH_ANGIOGENESIS_PATHWAY%MSIGDB_C2%PID_LYMPH_ANGIOGENESIS_PATHWAY		25	0.36598	1.05121	0.377358	0.670269	1	122	tags=8%, list=1%, signal=8%
DOWNSTREAM SIGNALING OF ACTIVATED FGFR4%REACTOME DATABASE ID RELEASE 57%5654716	DOWNSTREAM SIGNALING OF ACTIVATED FGFR4%REACTOME DATABASE ID RELEASE 57%5654716		281	0.247637	1.05056	0.328125	0.67076	1	2318	tags=19%, list=14%, signal=22%
SCAVENGING BY CLASS A RECEPTORS%REACTOME DATABASE ID RELEASE 57%3000480	SCAVENGING BY CLASS A RECEPTORS%REACTOME DATABASE ID RELEASE 57%3000480		16	0.411329	1.05006	0.409168	0.670928	1	4302	tags=31%, list=27%, signal=43%
SIGNALLING TO RAS%REACTOME DATABASE ID RELEASE 57%167044	SIGNALLING TO RAS%REACTOME DATABASE ID RELEASE 57%167044		206	0.254993	1.04914	0.343303	0.672168	1	2585	tags=20%, list=16%, signal=23%
TRANSCRIPTIONAL REGULATION BY THE AP-2 (TFAP2) FAMILY OF TRANSCRIPTION FACTORS%REACTOME DATABASE ID RELEASE 57%8864260	TRANSCRIPTIONAL REGULATION BY THE AP-2 (TFAP2) FAMILY OF TRANSCRIPTION FACTORS%REACTOME DATABASE ID RELEASE 57%8864260		31	0.344572	1.04909	0.385965	0.671042	1	4180	tags=39%, list=26%, signal=52%
BETA3 ADRENERGIC RECEPTOR SIGNALING PATHWAY%PANTHER PATHWAY%P04379	BETA3 ADRENERGIC RECEPTOR SIGNALING PATHWAY%PANTHER PATHWAY%P04379		24	0.371063	1.04901	0.402889	0.669991	1	1382	tags=17%, list=9%, signal=18%
ACYL CHAIN REMODELLING OF PC%REACTOME%R-HSA-1482788.2	ACYL CHAIN REMODELLING OF PC%REACTOME%R-HSA-1482788.2		24	0.37125	1.04836	0.404844	0.670548	1	3068	tags=33%, list=19%, signal=41%
EGF RECEPTOR (ERBB1) SIGNALING PATHWAY%PATHWAY INTERACTION DATABASE NCI-NATURE CURATED DATA%EGF RECEPTOR (ERBB1) SIGNALING PATHWAY	EGF RECEPTOR (ERBB1) SIGNALING PATHWAY%PATHWAY INTERACTION DATABASE NCI-NATURE CURATED DATA%EGF RECEPTOR (ERBB1) SIGNALING PATHWAY		31	0.346481	1.04793	0.37585	0.67039	1	3240	tags=32%, list=20%, signal=40%
BIOCARTA_PPARA_PATHWAY%MSIGDB_C2%BIOCARTA_PPARA_PATHWAY	BIOCARTA_PPARA_PATHWAY%MSIGDB_C2%BIOCARTA_PPARA_PATHWAY		54	0.313176	1.04777	0.388802	0.669536	1	4748	tags=39%, list=30%, signal=55%
DOWNSTREAM SIGNALING OF ACTIVATED FGFR2%REACTOME%R-HSA-5654696.1	DOWNSTREAM SIGNALING OF ACTIVATED FGFR2%REACTOME%R-HSA-5654696.1		281	0.247637	1.04599	0.329049	0.67307	1	2318	tags=19%, list=14%, signal=22%
LEPTIN%NETPATH%LEPTIN	LEPTIN%NETPATH%LEPTIN		87	0.282922	1.04574	0.366003	0.672518	1	2747	tags=22%, list=17%, signal=26%
SIGNALING BY FGFR1%REACTOME DATABASE ID RELEASE 57%5654736	SIGNALING BY FGFR1%REACTOME DATABASE ID RELEASE 57%5654736		288	0.246799	1.04309	0.350582	0.678738	1	2318	tags=19%, list=14%, signal=22%
SIGNALING BY SCF-KIT%REACTOME%R-HSA-1433557.1	SIGNALING BY SCF-KIT%REACTOME%R-HSA-1433557.1		277	0.247271	1.04191	0.37831	0.680675	1	2338	tags=19%, list=15%, signal=22%
HALLMARK_ESTROGEN_RESPONSE_EARLY%MSIGDB_C2%HALLMARK_ESTROGEN_RESPONSE_EARLY	HALLMARK_ESTROGEN_RESPONSE_EARLY%MSIGDB_C2%HALLMARK_ESTROGEN_RESPONSE_EARLY		188	0.255512	1.04065	0.366083	0.68273	1	3939	tags=31%, list=25%, signal=40%
BIOCARTA_TGFB_PATHWAY%MSIGDB_C2%BIOCARTA_TGFB_PATHWAY	BIOCARTA_TGFB_PATHWAY%MSIGDB_C2%BIOCARTA_TGFB_PATHWAY		19	0.385893	1.03942	0.400951	0.684932	1	5080	tags=42%, list=32%, signal=62%
NICOTINIC ACETYLCHOLINE RECEPTOR SIGNALING PATHWAY%PANTHER PATHWAY%P00044	NICOTINIC ACETYLCHOLINE RECEPTOR SIGNALING PATHWAY%PANTHER PATHWAY%P00044		75	0.28929	1.03907	0.394933	0.684602	1	2584	tags=20%, list=16%, signal=24%
GABA SYNTHESIS, RELEASE, REUPTAKE AND DEGRADATION%REACTOME DATABASE ID RELEASE 57%888590	GABA SYNTHESIS, RELEASE, REUPTAKE AND DEGRADATION%REACTOME DATABASE ID RELEASE 57%888590		15	0.407754	1.03695	0.422877	0.689035	1	3318	tags=40%, list=21%, signal=50%
PID_IL8_CXCR1_PATHWAY%MSIGDB_C2%PID_IL8_CXCR1_PATHWAY	PID_IL8_CXCR1_PATHWAY%MSIGDB_C2%PID_IL8_CXCR1_PATHWAY		27	0.358629	1.03672	0.39899	0.688433	1	1921	tags=22%, list=12%, signal=25%
TAK1 ACTIVATES NFKB BY PHOSPHORYLATION AND ACTIVATION OF IKKS COMPLEX%REACTOME DATABASE ID RELEASE 57%445989	TAK1 ACTIVATES NFKB BY PHOSPHORYLATION AND ACTIVATION OF IKKS COMPLEX%REACTOME DATABASE ID RELEASE 57%445989		23	0.355921	1.03648	0.404437	0.687833	1	1331	tags=22%, list=8%, signal=24%
IL-7%NETPATH%IL-7	IL-7%NETPATH%IL-7		25	0.363873	1.03486	0.416667	0.691051	1	770	tags=16%, list=5%, signal=17%
FRS-MEDIATED FGFR2 SIGNALING%REACTOME DATABASE ID RELEASE 57%5654700	FRS-MEDIATED FGFR2 SIGNALING%REACTOME DATABASE ID RELEASE 57%5654700		196	0.25275	1.03428	0.354881	0.691393	1	2318	tags=19%, list=14%, signal=22%
TRANSCRIPTIONAL ACTIVITY OF SMAD2 SMAD3:SMAD4 HETEROTRIMER%REACTOME%R-HSA-2173793.2	TRANSCRIPTIONAL ACTIVITY OF SMAD2 SMAD3:SMAD4 HETEROTRIMER%REACTOME%R-HSA-2173793.2		37	0.324539	1.03402	0.403756	0.690837	1	4267	tags=35%, list=27%, signal=48%
FLK2 FLT3%IOB%FLK2 FLT3	FLK2 FLT3%IOB%FLK2 FLT3		22	0.365887	1.03303	0.401305	0.692277	1	2462	tags=32%, list=15%, signal=38%
SHC-MEDIATED CASCADE:FGFR4%REACTOME DATABASE ID RELEASE 57%5654719	SHC-MEDIATED CASCADE:FGFR4%REACTOME DATABASE ID RELEASE 57%5654719		19	0.384899	1.0327	0.425081	0.69193	1	2246	tags=26%, list=14%, signal=31%
FRS-MEDIATED FGFR3 SIGNALING%REACTOME%R-HSA-5654706.1	FRS-MEDIATED FGFR3 SIGNALING%REACTOME%R-HSA-5654706.1		196	0.25275	1.03229	0.380336	0.691726	1	2318	tags=19%, list=14%, signal=22%
SIGNALING BY ERBB4%REACTOME DATABASE ID RELEASE 57%1236394	SIGNALING BY ERBB4%REACTOME DATABASE ID RELEASE 57%1236394		274	0.243816	1.03141	0.371975	0.692836	1	2318	tags=18%, list=14%, signal=21%
SHC-MEDIATED CASCADE:FGFR2%REACTOME DATABASE ID RELEASE 57%5654699	SHC-MEDIATED CASCADE:FGFR2%REACTOME DATABASE ID RELEASE 57%5654699		20	0.375366	1.03122	0.418487	0.69215	1	2246	tags=20%, list=14%, signal=23%
REGULATION OF ACTIN DYNAMICS FOR PHAGOCYTIC CUP FORMATION%REACTOME%R-HSA-2029482.1	REGULATION OF ACTIN DYNAMICS FOR PHAGOCYTIC CUP FORMATION%REACTOME%R-HSA-2029482.1		51	0.30975	1.03107	0.414484	0.691296	1	3106	tags=24%, list=19%, signal=29%
INTERLEUKIN-2 SIGNALING%REACTOME DATABASE ID RELEASE 57%451927	INTERLEUKIN-2 SIGNALING%REACTOME DATABASE ID RELEASE 57%451927		209	0.250437	1.03103	0.37751	0.690148	1	2318	tags=19%, list=14%, signal=22%
BIOCARTA_NOS1_PATHWAY%MSIGDB_C2%BIOCARTA_NOS1_PATHWAY	BIOCARTA_NOS1_PATHWAY%MSIGDB_C2%BIOCARTA_NOS1_PATHWAY		17	0.392047	1.03041	0.408638	0.690578	1	3553	tags=41%, list=22%, signal=53%
ANDROGENRECEPTOR%IOB%ANDROGENRECEPTOR	ANDROGENRECEPTOR%IOB%ANDROGENRECEPTOR		120	0.269062	1.03006	0.39749	0.690231	1	3239	tags=25%, list=20%, signal=31%
PID_ERBB1_RECEPTOR_PROXIMAL_PATHWAY%MSIGDB_C2%PID_ERBB1_RECEPTOR_PROXIMAL_PATHWAY	PID_ERBB1_RECEPTOR_PROXIMAL_PATHWAY%MSIGDB_C2%PID_ERBB1_RECEPTOR_PROXIMAL_PATHWAY		33	0.333817	1.02954	0.423138	0.690386	1	3240	tags=33%, list=20%, signal=42%
M-CSF%IOB%M-CSF	M-CSF%IOB%M-CSF		56	0.302375	1.02929	0.397816	0.689751	1	3258	tags=32%, list=20%, signal=40%
METABOTROPIC GLUTAMATE RECEPTOR GROUP II PATHWAY%PANTHER PATHWAY%P00040	METABOTROPIC GLUTAMATE RECEPTOR GROUP II PATHWAY%PANTHER PATHWAY%P00040		39	0.325235	1.02923	0.427215	0.688677	1	1382	tags=13%, list=9%, signal=14%
FRS-MEDIATED FGFR1 SIGNALING%REACTOME%R-HSA-5654693.1	FRS-MEDIATED FGFR1 SIGNALING%REACTOME%R-HSA-5654693.1		196	0.25275	1.02887	0.402075	0.688438	1	2318	tags=19%, list=14%, signal=22%
FC EPSILON RECEPTOR (FCERI) SIGNALING%REACTOME%R-HSA-2454202.1	FC EPSILON RECEPTOR (FCERI) SIGNALING%REACTOME%R-HSA-2454202.1		310	0.239664	1.02867	0.405161	0.687674	1	2338	tags=18%, list=15%, signal=21%
COOPERATION OF PDCL (PHLP1) AND TRIC CCT IN G-PROTEIN BETA FOLDING%REACTOME%R-HSA-6814122.1	COOPERATION OF PDCL (PHLP1) AND TRIC CCT IN G-PROTEIN BETA FOLDING%REACTOME%R-HSA-6814122.1		39	0.323826	1.02768	0.422713	0.689191	1	716	tags=15%, list=4%, signal=16%
THROMBIN SIGNALLING THROUGH PROTEINASE ACTIVATED RECEPTORS (PARS)%REACTOME DATABASE ID RELEASE 57%456926	THROMBIN SIGNALLING THROUGH PROTEINASE ACTIVATED RECEPTORS (PARS)%REACTOME DATABASE ID RELEASE 57%456926		30	0.342433	1.02494	0.425424	0.695461	1	2420	tags=23%, list=15%, signal=27%
NGF SIGNALLING VIA TRKA FROM THE PLASMA MEMBRANE%REACTOME%R-HSA-187037.1	NGF SIGNALLING VIA TRKA FROM THE PLASMA MEMBRANE%REACTOME%R-HSA-187037.1		325	0.239083	1.0248	0.401709	0.69461	1	2585	tags=20%, list=16%, signal=23%
BIOCARTA_IL2_PATHWAY%MSIGDB_C2%BIOCARTA_IL2_PATHWAY	BIOCARTA_IL2_PATHWAY%MSIGDB_C2%BIOCARTA_IL2_PATHWAY		20	0.376012	1.02452	0.435626	0.694055	1	1057	tags=15%, list=7%, signal=16%
ID%NETPATH%ID	ID%NETPATH%ID		36	0.328611	1.02377	0.414676	0.69487	1	2739	tags=22%, list=17%, signal=27%
O-GLYCOSYLATION OF TSR DOMAIN-CONTAINING PROTEINS%REACTOME DATABASE ID RELEASE 57%5173214	O-GLYCOSYLATION OF TSR DOMAIN-CONTAINING PROTEINS%REACTOME DATABASE ID RELEASE 57%5173214		37	0.321364	1.02371	0.424837	0.693776	1	867	tags=14%, list=5%, signal=14%
FC-EPSILON RECEPTOR I SIGNALING IN MAST CELLS%PATHWAY INTERACTION DATABASE NCI-NATURE CURATED DATA%FC-EPSILON RECEPTOR I SIGNALING IN MAST CELLS	FC-EPSILON RECEPTOR I SIGNALING IN MAST CELLS%PATHWAY INTERACTION DATABASE NCI-NATURE CURATED DATA%FC-EPSILON RECEPTOR I SIGNALING IN MAST CELLS		55	0.302753	1.0233	0.40429	0.693557	1	1292	tags=16%, list=8%, signal=18%
MAPK1 MAPK3 SIGNALING%REACTOME DATABASE ID RELEASE 57%5684996	MAPK1 MAPK3 SIGNALING%REACTOME DATABASE ID RELEASE 57%5684996		200	0.249826	1.02205	0.4	0.695832	1	2585	tags=20%, list=16%, signal=24%
HALLMARK_KRAS_SIGNALING_DN%MSIGDB_C2%HALLMARK_KRAS_SIGNALING_DN	HALLMARK_KRAS_SIGNALING_DN%MSIGDB_C2%HALLMARK_KRAS_SIGNALING_DN		183	0.248606	1.02169	0.403694	0.695577	1	4485	tags=28%, list=28%, signal=38%
THROMBOXANE SIGNALLING THROUGH TP RECEPTOR%REACTOME DATABASE ID RELEASE 57%428930	THROMBOXANE SIGNALLING THROUGH TP RECEPTOR%REACTOME DATABASE ID RELEASE 57%428930		22	0.366397	1.02076	0.407591	0.696898	1	1382	tags=18%, list=9%, signal=20%
FRS2-MEDIATED ACTIVATION%REACTOME DATABASE ID RELEASE 57%170968	FRS2-MEDIATED ACTIVATION%REACTOME DATABASE ID RELEASE 57%170968		200	0.250209	1.0173	0.432653	0.70511	1	2318	tags=19%, list=14%, signal=21%
TRANSLESION SYNTHESIS BY Y FAMILY DNA POLYMERASES BYPASSES LESIONS ON DNA TEMPLATE%REACTOME%R-HSA-110313.1	TRANSLESION SYNTHESIS BY Y FAMILY DNA POLYMERASES BYPASSES LESIONS ON DNA TEMPLATE%REACTOME%R-HSA-110313.1		32	0.337463	1.01722	0.421311	0.70403	1	3662	tags=38%, list=23%, signal=49%
FRS-MEDIATED FGFR4 SIGNALING%REACTOME%R-HSA-5654712.1	FRS-MEDIATED FGFR4 SIGNALING%REACTOME%R-HSA-5654712.1		196	0.25275	1.01675	0.409703	0.704042	1	2318	tags=19%, list=14%, signal=22%
5HT1 TYPE RECEPTOR MEDIATED SIGNALING PATHWAY%PANTHER PATHWAY%P04373	5HT1 TYPE RECEPTOR MEDIATED SIGNALING PATHWAY%PANTHER PATHWAY%P04373		38	0.319848	1.01665	0.425039	0.703046	1	1382	tags=13%, list=9%, signal=14%
SIGNALING BY FGFR2%REACTOME%R-HSA-5654738.2	SIGNALING BY FGFR2%REACTOME%R-HSA-5654738.2		310	0.237818	1.01612	0.419643	0.703232	1	2318	tags=18%, list=14%, signal=21%
WNT SIGNALING PATHWAY%PANTHER PATHWAY%P00057	WNT SIGNALING PATHWAY%PANTHER PATHWAY%P00057		230	0.246678	1.01598	0.399215	0.702383	1	4075	tags=30%, list=25%, signal=40%
DOWNSTREAM SIGNALING OF ACTIVATED FGFR1%REACTOME DATABASE ID RELEASE 57%5654687	DOWNSTREAM SIGNALING OF ACTIVATED FGFR1%REACTOME DATABASE ID RELEASE 57%5654687		284	0.239982	1.0157	0.439644	0.701846	1	2318	tags=19%, list=14%, signal=21%
SHC1 EVENTS IN EGFR SIGNALING%REACTOME%R-HSA-180336.1	SHC1 EVENTS IN EGFR SIGNALING%REACTOME%R-HSA-180336.1		195	0.248764	1.01555	0.406897	0.701073	1	2318	tags=18%, list=14%, signal=21%
SHC1 EVENTS IN ERBB4 SIGNALING%REACTOME%R-HSA-1250347.1	SHC1 EVENTS IN ERBB4 SIGNALING%REACTOME%R-HSA-1250347.1		195	0.248764	1.01506	0.423025	0.701147	1	2318	tags=18%, list=14%, signal=21%
SIGNALLING TO ERKS%REACTOME DATABASE ID RELEASE 57%187687	SIGNALLING TO ERKS%REACTOME DATABASE ID RELEASE 57%187687		213	0.245496	1.01361	0.415167	0.70384	1	2318	tags=18%, list=14%, signal=21%
PID_RAC1_REG_PATHWAY%MSIGDB_C2%PID_RAC1_REG_PATHWAY	PID_RAC1_REG_PATHWAY%MSIGDB_C2%PID_RAC1_REG_PATHWAY		33	0.331007	1.01326	0.444822	0.703577	1	2394	tags=18%, list=15%, signal=21%
BIOCARTA_FCER1_PATHWAY%MSIGDB_C2%BIOCARTA_FCER1_PATHWAY	BIOCARTA_FCER1_PATHWAY%MSIGDB_C2%BIOCARTA_FCER1_PATHWAY		34	0.333061	1.01288	0.417582	0.70333	1	1796	tags=15%, list=11%, signal=17%
SOS-MEDIATED SIGNALLING%REACTOME%R-HSA-112412.1	SOS-MEDIATED SIGNALLING%REACTOME%R-HSA-112412.1		195	0.248764	1.01218	0.43634	0.703966	1	2318	tags=18%, list=14%, signal=21%
GRB2 EVENTS IN EGFR SIGNALING%REACTOME DATABASE ID RELEASE 57%179812	GRB2 EVENTS IN EGFR SIGNALING%REACTOME DATABASE ID RELEASE 57%179812		195	0.248764	1.0115	0.431105	0.704676	1	2318	tags=18%, list=14%, signal=21%
RAF MAP KINASE CASCADE%REACTOME DATABASE ID RELEASE 57%5673001	RAF MAP KINASE CASCADE%REACTOME DATABASE ID RELEASE 57%5673001		195	0.248764	1.01091	0.416778	0.704976	1	2318	tags=18%, list=14%, signal=21%
TOLL-LIKE RECEPTORS CASCADES%REACTOME%R-HSA-168898.2	TOLL-LIKE RECEPTORS CASCADES%REACTOME%R-HSA-168898.2		131	0.259373	1.01053	0.454918	0.704812	1	2881	tags=21%, list=18%, signal=26%
REGULATION OF RAC1 ACTIVITY%PATHWAY INTERACTION DATABASE NCI-NATURE CURATED DATA%REGULATION OF RAC1 ACTIVITY	REGULATION OF RAC1 ACTIVITY%PATHWAY INTERACTION DATABASE NCI-NATURE CURATED DATA%REGULATION OF RAC1 ACTIVITY		33	0.331007	1.00946	0.442308	0.706453	1	2394	tags=18%, list=15%, signal=21%
BIOCARTA_INSULIN_PATHWAY%MSIGDB_C2%BIOCARTA_INSULIN_PATHWAY	BIOCARTA_INSULIN_PATHWAY%MSIGDB_C2%BIOCARTA_INSULIN_PATHWAY		20	0.371889	1.00827	0.453626	0.708404	1	3117	tags=30%, list=19%, signal=37%
IMMUNOREGULATORY INTERACTIONS BETWEEN A LYMPHOID AND A NON-LYMPHOID CELL%REACTOME%R-HSA-198933.4	IMMUNOREGULATORY INTERACTIONS BETWEEN A LYMPHOID AND A NON-LYMPHOID CELL%REACTOME%R-HSA-198933.4		47	0.29919	1.00664	0.43036	0.711444	1	5516	tags=38%, list=34%, signal=58%
DISEASES ASSOCIATED WITH O-GLYCOSYLATION OF PROTEINS%REACTOME%R-HSA-3906995.1	DISEASES ASSOCIATED WITH O-GLYCOSYLATION OF PROTEINS%REACTOME%R-HSA-3906995.1		45	0.309562	1.00663	0.459843	0.710231	1	4009	tags=36%, list=25%, signal=47%
B CELL ACTIVATION%PANTHER PATHWAY%P00010	B CELL ACTIVATION%PANTHER PATHWAY%P00010		52	0.299461	1.00565	0.446617	0.711565	1	3410	tags=27%, list=21%, signal=34%
GAMMA CARBOXYLATION, HYPUSINE FORMATION AND ARYLSULFATASE ACTIVATION%REACTOME DATABASE ID RELEASE 57%163841	GAMMA CARBOXYLATION, HYPUSINE FORMATION AND ARYLSULFATASE ACTIVATION%REACTOME DATABASE ID RELEASE 57%163841		32	0.333575	1.00548	0.449251	0.71078	1	1375	tags=16%, list=9%, signal=17%
PID_P38_ALPHA_BETA_DOWNSTREAM_PATHWAY%MSIGDB_C2%PID_P38_ALPHA_BETA_DOWNSTREAM_PATHWAY	PID_P38_ALPHA_BETA_DOWNSTREAM_PATHWAY%MSIGDB_C2%PID_P38_ALPHA_BETA_DOWNSTREAM_PATHWAY		34	0.325486	1.00337	0.464927	0.715228	1	1572	tags=21%, list=10%, signal=23%
ST_INTEGRIN_SIGNALING_PATHWAY%MSIGDB_C2%ST_INTEGRIN_SIGNALING_PATHWAY	ST_INTEGRIN_SIGNALING_PATHWAY%MSIGDB_C2%ST_INTEGRIN_SIGNALING_PATHWAY		77	0.279977	1.00154	0.457271	0.718896	1	4220	tags=30%, list=26%, signal=40%
UNTITLED%PANTHER PATHWAY%P05916	UNTITLED%PANTHER PATHWAY%P05916		30	0.333956	1.00118	0.458746	0.718658	1	458	tags=10%, list=3%, signal=10%
TERMINATION OF TRANSLESION DNA SYNTHESIS%REACTOME DATABASE ID RELEASE 57%5656169	TERMINATION OF TRANSLESION DNA SYNTHESIS%REACTOME DATABASE ID RELEASE 57%5656169		25	0.349257	1.00049	0.4618	0.719238	1	3662	tags=40%, list=23%, signal=52%
BIOCARTA_ERK_PATHWAY%MSIGDB_C2%BIOCARTA_ERK_PATHWAY	BIOCARTA_ERK_PATHWAY%MSIGDB_C2%BIOCARTA_ERK_PATHWAY		25	0.349934	1.00006	0.457377	0.719183	1	3167	tags=24%, list=20%, signal=30%
RIG-I MDA5 MEDIATED INDUCTION OF IFN-ALPHA BETA PATHWAYS%REACTOME%R-HSA-168928.1	RIG-I MDA5 MEDIATED INDUCTION OF IFN-ALPHA BETA PATHWAYS%REACTOME%R-HSA-168928.1		53	0.295324	0.999922	0.454264	0.718334	1	3201	tags=32%, list=20%, signal=40%
GM-CSF%IOB%GM-CSF	GM-CSF%IOB%GM-CSF		74	0.280799	0.998728	0.470501	0.720403	1	2648	tags=22%, list=17%, signal=26%
LIGAND-GATED ION CHANNEL TRANSPORT%REACTOME DATABASE ID RELEASE 57%975298	LIGAND-GATED ION CHANNEL TRANSPORT%REACTOME DATABASE ID RELEASE 57%975298		23	0.358026	0.998559	0.470489	0.71964	1	3886	tags=39%, list=24%, signal=52%
BETA1 ADRENERGIC RECEPTOR SIGNALING PATHWAY%PANTHER PATHWAY%P04377	BETA1 ADRENERGIC RECEPTOR SIGNALING PATHWAY%PANTHER PATHWAY%P04377		29	0.333481	0.997828	0.460526	0.720393	1	458	tags=10%, list=3%, signal=11%
SIGNALING EVENTS REGULATED BY RET TYROSINE KINASE%PATHWAY INTERACTION DATABASE NCI-NATURE CURATED DATA%SIGNALING EVENTS REGULATED BY RET TYROSINE KINASE	SIGNALING EVENTS REGULATED BY RET TYROSINE KINASE%PATHWAY INTERACTION DATABASE NCI-NATURE CURATED DATA%SIGNALING EVENTS REGULATED BY RET TYROSINE KINASE		37	0.315532	0.997454	0.472222	0.720185	1	3167	tags=30%, list=20%, signal=37%
INTERLEUKIN RECEPTOR SHC SIGNALING%REACTOME%R-HSA-912526.3	INTERLEUKIN RECEPTOR SHC SIGNALING%REACTOME%R-HSA-912526.3		204	0.242781	0.996917	0.472149	0.720472	1	2318	tags=19%, list=14%, signal=21%
BIOCARTA_TOLL_PATHWAY%MSIGDB_C2%BIOCARTA_TOLL_PATHWAY	BIOCARTA_TOLL_PATHWAY%MSIGDB_C2%BIOCARTA_TOLL_PATHWAY		34	0.328063	0.996684	0.465347	0.719928	1	1057	tags=15%, list=7%, signal=16%
SIGNALING BY FGFR1 IN DISEASE%REACTOME DATABASE ID RELEASE 57%5655302	SIGNALING BY FGFR1 IN DISEASE%REACTOME DATABASE ID RELEASE 57%5655302		32	0.32761	0.99426	0.476708	0.725091	1	2462	tags=25%, list=15%, signal=29%
SIGNALLING TO P38 VIA RIT AND RIN%REACTOME DATABASE ID RELEASE 57%187706	SIGNALLING TO P38 VIA RIT AND RIN%REACTOME DATABASE ID RELEASE 57%187706		199	0.244899	0.993462	0.466757	0.726036	1	2318	tags=18%, list=14%, signal=21%
BIOCARTA_ETS_PATHWAY%MSIGDB_C2%BIOCARTA_ETS_PATHWAY	BIOCARTA_ETS_PATHWAY%MSIGDB_C2%BIOCARTA_ETS_PATHWAY		18	0.380123	0.993377	0.491228	0.725082	1	4391	tags=39%, list=27%, signal=53%
IL5%NETPATH%IL5	IL5%NETPATH%IL5		54	0.292297	0.991992	0.4496	0.727459	1	2462	tags=20%, list=15%, signal=24%
PID_KIT_PATHWAY%MSIGDB_C2%PID_KIT_PATHWAY	PID_KIT_PATHWAY%MSIGDB_C2%PID_KIT_PATHWAY		50	0.293226	0.991904	0.45469	0.72649	1	3117	tags=30%, list=19%, signal=37%
EPH-EPHRIN MEDIATED REPULSION OF CELLS%REACTOME DATABASE ID RELEASE 57%3928665	EPH-EPHRIN MEDIATED REPULSION OF CELLS%REACTOME DATABASE ID RELEASE 57%3928665		41	0.306109	0.990214	0.464789	0.729703	1	2660	tags=27%, list=17%, signal=32%
PROLONGED ERK ACTIVATION EVENTS%REACTOME%R-HSA-169893.1	PROLONGED ERK ACTIVATION EVENTS%REACTOME%R-HSA-169893.1		202	0.241558	0.988164	0.494565	0.733938	1	2318	tags=18%, list=14%, signal=21%
ARMS-MEDIATED ACTIVATION%REACTOME%R-HSA-170984.1	ARMS-MEDIATED ACTIVATION%REACTOME%R-HSA-170984.1		199	0.239128	0.988119	0.490119	0.732832	1	2318	tags=18%, list=14%, signal=21%
PID_RET_PATHWAY%MSIGDB_C2%PID_RET_PATHWAY	PID_RET_PATHWAY%MSIGDB_C2%PID_RET_PATHWAY		37	0.315532	0.985348	0.48366	0.73891	1	3167	tags=30%, list=20%, signal=37%
REGULATION OF RAS FAMILY ACTIVATION%PATHWAY INTERACTION DATABASE NCI-NATURE CURATED DATA%REGULATION OF RAS FAMILY ACTIVATION	REGULATION OF RAS FAMILY ACTIVATION%PATHWAY INTERACTION DATABASE NCI-NATURE CURATED DATA%REGULATION OF RAS FAMILY ACTIVATION		28	0.330475	0.985193	0.487765	0.738097	1	2239	tags=21%, list=14%, signal=25%
BIOCARTA_NGF_PATHWAY%MSIGDB_C2%BIOCARTA_NGF_PATHWAY	BIOCARTA_NGF_PATHWAY%MSIGDB_C2%BIOCARTA_NGF_PATHWAY		17	0.371501	0.985064	0.478477	0.737228	1	1057	tags=12%, list=7%, signal=13%
HALLMARK_ADIPOGENESIS%MSIGDB_C2%HALLMARK_ADIPOGENESIS	HALLMARK_ADIPOGENESIS%MSIGDB_C2%HALLMARK_ADIPOGENESIS		180	0.246019	0.984009	0.482713	0.738785	1	2608	tags=19%, list=16%, signal=23%
SEMAPHORIN INTERACTIONS%REACTOME DATABASE ID RELEASE 57%373755	SEMAPHORIN INTERACTIONS%REACTOME DATABASE ID RELEASE 57%373755		64	0.282443	0.983782	0.478979	0.73814	1	2753	tags=25%, list=17%, signal=30%
RESOLUTION OF D-LOOP STRUCTURES THROUGH SYNTHESIS-DEPENDENT STRAND ANNEALING (SDSA)%REACTOME%R-HSA-5693554.1	RESOLUTION OF D-LOOP STRUCTURES THROUGH SYNTHESIS-DEPENDENT STRAND ANNEALING (SDSA)%REACTOME%R-HSA-5693554.1		23	0.34281	0.981265	0.488449	0.743503	1	4744	tags=43%, list=30%, signal=62%
SMAD2 SMAD3:SMAD4 HETEROTRIMER REGULATES TRANSCRIPTION%REACTOME%R-HSA-2173796.1	SMAD2 SMAD3:SMAD4 HETEROTRIMER REGULATES TRANSCRIPTION%REACTOME%R-HSA-2173796.1		25	0.342986	0.981171	0.486088	0.742551	1	5080	tags=44%, list=32%, signal=64%
BIOCARTA_PYK2_PATHWAY%MSIGDB_C2%BIOCARTA_PYK2_PATHWAY	BIOCARTA_PYK2_PATHWAY%MSIGDB_C2%BIOCARTA_PYK2_PATHWAY		23	0.344041	0.980938	0.488525	0.741922	1	3167	tags=30%, list=20%, signal=38%
PEPTIDE LIGAND-BINDING RECEPTORS%REACTOME DATABASE ID RELEASE 57%375276	PEPTIDE LIGAND-BINDING RECEPTORS%REACTOME DATABASE ID RELEASE 57%375276		160	0.244727	0.980069	0.506702	0.743062	1	5044	tags=31%, list=31%, signal=45%
BIOCARTA_RHO_PATHWAY%MSIGDB_C2%BIOCARTA_RHO_PATHWAY	BIOCARTA_RHO_PATHWAY%MSIGDB_C2%BIOCARTA_RHO_PATHWAY		26	0.335065	0.979183	0.5	0.744177	1	4555	tags=46%, list=28%, signal=64%
BIOCARTA_HIVNEF_PATHWAY%MSIGDB_C2%BIOCARTA_HIVNEF_PATHWAY	BIOCARTA_HIVNEF_PATHWAY%MSIGDB_C2%BIOCARTA_HIVNEF_PATHWAY		53	0.289251	0.978668	0.5	0.744412	1	2049	tags=19%, list=13%, signal=22%
PHOSPHATIDYLGLYCEROL BIOSYNTHESIS II (NON-PLASTIDIC)%HUMANCYC%PWY4FS-8	PHOSPHATIDYLGLYCEROL BIOSYNTHESIS II (NON-PLASTIDIC)%HUMANCYC%PWY4FS-8		17	0.382341	0.978214	0.501701	0.744376	1	4368	tags=53%, list=27%, signal=73%
PID_RAS_PATHWAY%MSIGDB_C2%PID_RAS_PATHWAY	PID_RAS_PATHWAY%MSIGDB_C2%PID_RAS_PATHWAY		28	0.330475	0.97797	0.482982	0.743803	1	2239	tags=21%, list=14%, signal=25%
PRE-NOTCH TRANSCRIPTION AND TRANSLATION%REACTOME%R-HSA-1912408.1	PRE-NOTCH TRANSCRIPTION AND TRANSLATION%REACTOME%R-HSA-1912408.1		27	0.328986	0.977892	0.496516	0.742803	1	3189	tags=33%, list=20%, signal=42%
SIGNALING BY FGFR%REACTOME DATABASE ID RELEASE 57%190236	SIGNALING BY FGFR%REACTOME DATABASE ID RELEASE 57%190236		315	0.228735	0.977394	0.521684	0.742977	1	2318	tags=18%, list=14%, signal=21%
PID_AR_NONGENOMIC_PATHWAY%MSIGDB_C2%PID_AR_NONGENOMIC_PATHWAY	PID_AR_NONGENOMIC_PATHWAY%MSIGDB_C2%PID_AR_NONGENOMIC_PATHWAY		29	0.328359	0.977206	0.502362	0.742292	1	5477	tags=52%, list=34%, signal=78%
BIOLOGICAL OXIDATIONS%REACTOME DATABASE ID RELEASE 57%211859	BIOLOGICAL OXIDATIONS%REACTOME DATABASE ID RELEASE 57%211859		120	0.254611	0.976053	0.505007	0.74415	1	4737	tags=38%, list=30%, signal=54%
HALLMARK_SPERMATOGENESIS%MSIGDB_C2%HALLMARK_SPERMATOGENESIS	HALLMARK_SPERMATOGENESIS%MSIGDB_C2%HALLMARK_SPERMATOGENESIS		128	0.254532	0.974012	0.505095	0.74829	1	3140	tags=20%, list=20%, signal=25%
WNT5A-DEPENDENT INTERNALIZATION OF FZD4%REACTOME%R-HSA-5099900.1	WNT5A-DEPENDENT INTERNALIZATION OF FZD4%REACTOME%R-HSA-5099900.1		15	0.378908	0.973883	0.509213	0.747394	1	4305	tags=53%, list=27%, signal=73%
VISUAL PHOTOTRANSDUCTION%REACTOME%R-HSA-2187338.1	VISUAL PHOTOTRANSDUCTION%REACTOME%R-HSA-2187338.1		80	0.266841	0.973828	0.510479	0.746334	1	3890	tags=34%, list=24%, signal=44%
NONGENOTROPIC ANDROGEN SIGNALING%PATHWAY INTERACTION DATABASE NCI-NATURE CURATED DATA%NONGENOTROPIC ANDROGEN SIGNALING	NONGENOTROPIC ANDROGEN SIGNALING%PATHWAY INTERACTION DATABASE NCI-NATURE CURATED DATA%NONGENOTROPIC ANDROGEN SIGNALING		29	0.328359	0.97362	0.510708	0.745677	1	5477	tags=52%, list=34%, signal=78%
CHEMOKINE RECEPTORS BIND CHEMOKINES%REACTOME%R-HSA-380108.3	CHEMOKINE RECEPTORS BIND CHEMOKINES%REACTOME%R-HSA-380108.3		38	0.306101	0.973174	0.490291	0.745616	1	4548	tags=34%, list=28%, signal=48%
SYNTHESIS OF PA%REACTOME DATABASE ID RELEASE 57%1483166	SYNTHESIS OF PA%REACTOME DATABASE ID RELEASE 57%1483166		27	0.327152	0.971355	0.509804	0.74898	1	4368	tags=37%, list=27%, signal=51%
INSULIN IGF PATHWAY-PROTEIN KINASE B SIGNALING CASCADE%PANTHER PATHWAY%P00033	INSULIN IGF PATHWAY-PROTEIN KINASE B SIGNALING CASCADE%PANTHER PATHWAY%P00033		20	0.358904	0.97126	0.523729	0.748017	1	2551	tags=25%, list=16%, signal=30%
CLASS I PI3K SIGNALING EVENTS%PATHWAY INTERACTION DATABASE NCI-NATURE CURATED DATA%CLASS I PI3K SIGNALING EVENTS	CLASS I PI3K SIGNALING EVENTS%PATHWAY INTERACTION DATABASE NCI-NATURE CURATED DATA%CLASS I PI3K SIGNALING EVENTS		43	0.300954	0.967516	0.496025	0.75663	1	3418	tags=28%, list=21%, signal=35%
APOPTOTIC CLEAVAGE OF CELLULAR PROTEINS%REACTOME DATABASE ID RELEASE 57%111465	APOPTOTIC CLEAVAGE OF CELLULAR PROTEINS%REACTOME DATABASE ID RELEASE 57%111465		31	0.319686	0.967203	0.512195	0.756215	1	3115	tags=26%, list=19%, signal=32%
SIGNALING EVENTS MEDIATED BY STEM CELL FACTOR RECEPTOR (C-KIT)%PATHWAY INTERACTION DATABASE NCI-NATURE CURATED DATA%SIGNALING EVENTS MEDIATED BY STEM CELL FACTOR RECEPTOR (C-KIT)	SIGNALING EVENTS MEDIATED BY STEM CELL FACTOR RECEPTOR (C-KIT)%PATHWAY INTERACTION DATABASE NCI-NATURE CURATED DATA%SIGNALING EVENTS MEDIATED BY STEM CELL FACTOR RECEPTOR (C-KIT)		50	0.293226	0.96709	0.53125	0.755262	1	3117	tags=30%, list=19%, signal=37%
TRIF-MEDIATED TLR3 TLR4 SIGNALING%REACTOME DATABASE ID RELEASE 57%937061	TRIF-MEDIATED TLR3 TLR4 SIGNALING%REACTOME DATABASE ID RELEASE 57%937061		85	0.263883	0.966876	0.525502	0.754648	1	3339	tags=26%, list=21%, signal=33%
TOLL LIKE RECEPTOR 3 (TLR3) CASCADE%REACTOME%R-HSA-168164.1	TOLL LIKE RECEPTOR 3 (TLR3) CASCADE%REACTOME%R-HSA-168164.1		85	0.263883	0.965845	0.532374	0.756204	1	3339	tags=26%, list=21%, signal=33%
CXCR4-MEDIATED SIGNALING EVENTS%PATHWAY INTERACTION DATABASE NCI-NATURE CURATED DATA%CXCR4-MEDIATED SIGNALING EVENTS	CXCR4-MEDIATED SIGNALING EVENTS%PATHWAY INTERACTION DATABASE NCI-NATURE CURATED DATA%CXCR4-MEDIATED SIGNALING EVENTS		75	0.270996	0.965522	0.532925	0.755875	1	3472	tags=31%, list=22%, signal=39%
OPIOID PROOPIOMELANOCORTIN PATHWAY%PANTHER PATHWAY%P05917	OPIOID PROOPIOMELANOCORTIN PATHWAY%PANTHER PATHWAY%P05917		28	0.325535	0.964347	0.501678	0.757772	1	458	tags=11%, list=3%, signal=11%
SIGNALING BY TYPE 1 INSULIN-LIKE GROWTH FACTOR 1 RECEPTOR (IGF1R)%REACTOME DATABASE ID RELEASE 57%2404192	SIGNALING BY TYPE 1 INSULIN-LIKE GROWTH FACTOR 1 RECEPTOR (IGF1R)%REACTOME DATABASE ID RELEASE 57%2404192		243	0.231438	0.963581	0.559153	0.758631	1	2585	tags=19%, list=16%, signal=22%
TCR%NETPATH%TCR	TCR%NETPATH%TCR		237	0.230916	0.962967	0.55305	0.759053	1	2800	tags=19%, list=17%, signal=22%
MYD88-INDEPENDENT TLR3 TLR4 CASCADE%REACTOME%R-HSA-166166.1	MYD88-INDEPENDENT TLR3 TLR4 CASCADE%REACTOME%R-HSA-166166.1		85	0.263883	0.962617	0.54612	0.758804	1	3339	tags=26%, list=21%, signal=33%
IRS-RELATED EVENTS TRIGGERED BY IGF1R%REACTOME DATABASE ID RELEASE 57%2428928	IRS-RELATED EVENTS TRIGGERED BY IGF1R%REACTOME DATABASE ID RELEASE 57%2428928		243	0.231438	0.961871	0.553947	0.75951	1	2585	tags=19%, list=16%, signal=22%
FSH%NETPATH%FSH	FSH%NETPATH%FSH		40	0.29942	0.961061	0.528331	0.760478	1	2091	tags=18%, list=13%, signal=20%
REGULATION OF LIPID METABOLISM BY PEROXISOME PROLIFERATOR-ACTIVATED RECEPTOR ALPHA (PPARALPHA)%REACTOME DATABASE ID RELEASE 57%400206	REGULATION OF LIPID METABOLISM BY PEROXISOME PROLIFERATOR-ACTIVATED RECEPTOR ALPHA (PPARALPHA)%REACTOME DATABASE ID RELEASE 57%400206		104	0.254294	0.959351	0.552786	0.763643	1	4171	tags=34%, list=26%, signal=45%
SIGNALING BY TGF-BETA RECEPTOR COMPLEX%REACTOME%R-HSA-170834.1	SIGNALING BY TGF-BETA RECEPTOR COMPLEX%REACTOME%R-HSA-170834.1		62	0.273561	0.957823	0.51875	0.766423	1	4267	tags=31%, list=27%, signal=42%
REGULATION OF SIGNALING BY CBL%REACTOME%R-HSA-912631.1	REGULATION OF SIGNALING BY CBL%REACTOME%R-HSA-912631.1		16	0.375947	0.95702	0.535714	0.767244	1	3039	tags=38%, list=19%, signal=46%
IGF1R SIGNALING CASCADE%REACTOME%R-HSA-2428924.1	IGF1R SIGNALING CASCADE%REACTOME%R-HSA-2428924.1		243	0.231438	0.956898	0.573107	0.766405	1	2585	tags=19%, list=16%, signal=22%
NEPHRIN INTERACTIONS%REACTOME%R-HSA-373753.1	NEPHRIN INTERACTIONS%REACTOME%R-HSA-373753.1		19	0.351012	0.952646	0.528926	0.776204	1	2310	tags=21%, list=14%, signal=25%
PID_TELOMERASE_PATHWAY%MSIGDB_C2%PID_TELOMERASE_PATHWAY	PID_TELOMERASE_PATHWAY%MSIGDB_C2%PID_TELOMERASE_PATHWAY		61	0.273082	0.951088	0.520801	0.778924	1	2234	tags=18%, list=14%, signal=21%
GASTRIN_CCK2R_240212%PANTHER PATHWAY%P06959	GASTRIN_CCK2R_240212%PANTHER PATHWAY%P06959		135	0.245829	0.950695	0.571229	0.778749	1	2462	tags=19%, list=15%, signal=23%
CDP-DIACYLGLYCEROL BIOSYNTHESIS I%HUMANCYC%PWY-5667	CDP-DIACYLGLYCEROL BIOSYNTHESIS I%HUMANCYC%PWY-5667		16	0.366952	0.949803	0.520761	0.779783	1	4368	tags=50%, list=27%, signal=69%
CORTOCOTROPIN RELEASING FACTOR RECEPTOR SIGNALING PATHWAY%PANTHER PATHWAY%P04380	CORTOCOTROPIN RELEASING FACTOR RECEPTOR SIGNALING PATHWAY%PANTHER PATHWAY%P04380		27	0.326044	0.949464	0.552167	0.779427	1	458	tags=11%, list=3%, signal=11%
RAS PATHWAY%PANTHER PATHWAY%P04393	RAS PATHWAY%PANTHER PATHWAY%P04393		63	0.273549	0.947965	0.521805	0.782018	1	2468	tags=22%, list=15%, signal=26%
BIOCARTA_G2_PATHWAY%MSIGDB_C2%BIOCARTA_G2_PATHWAY	BIOCARTA_G2_PATHWAY%MSIGDB_C2%BIOCARTA_G2_PATHWAY		19	0.350224	0.947447	0.533858	0.782162	1	2830	tags=32%, list=18%, signal=38%
IL1-MEDIATED SIGNALING EVENTS%PATHWAY INTERACTION DATABASE NCI-NATURE CURATED DATA%IL1-MEDIATED SIGNALING EVENTS	IL1-MEDIATED SIGNALING EVENTS%PATHWAY INTERACTION DATABASE NCI-NATURE CURATED DATA%IL1-MEDIATED SIGNALING EVENTS		34	0.306404	0.94641	0.544444	0.783612	1	1852	tags=21%, list=12%, signal=23%
PPARA ACTIVATES GENE EXPRESSION%REACTOME%R-HSA-1989781.2	PPARA ACTIVATES GENE EXPRESSION%REACTOME%R-HSA-1989781.2		102	0.251219	0.945756	0.580736	0.784086	1	4171	tags=33%, list=26%, signal=45%
HALLMARK_BILE_ACID_METABOLISM%MSIGDB_C2%HALLMARK_BILE_ACID_METABOLISM	HALLMARK_BILE_ACID_METABOLISM%MSIGDB_C2%HALLMARK_BILE_ACID_METABOLISM		107	0.250334	0.945244	0.559441	0.784179	1	2438	tags=20%, list=15%, signal=23%
IRS-MEDIATED SIGNALLING%REACTOME%R-HSA-112399.1	IRS-MEDIATED SIGNALLING%REACTOME%R-HSA-112399.1		239	0.22761	0.945195	0.589404	0.783082	1	2585	tags=19%, list=16%, signal=22%
N-GLYCAN ANTENNAE ELONGATION IN THE MEDIAL TRANS-GOLGI%REACTOME%R-HSA-975576.1	N-GLYCAN ANTENNAE ELONGATION IN THE MEDIAL TRANS-GOLGI%REACTOME%R-HSA-975576.1		23	0.330188	0.940978	0.553018	0.792574	1	3791	tags=39%, list=24%, signal=51%
MAPK TARGETS NUCLEAR EVENTS MEDIATED BY MAP KINASES%REACTOME DATABASE ID RELEASE 57%450282	MAPK TARGETS NUCLEAR EVENTS MEDIATED BY MAP KINASES%REACTOME DATABASE ID RELEASE 57%450282		29	0.315027	0.938028	0.551155	0.798797	1	1734	tags=17%, list=11%, signal=19%
REGULATION OF TELOMERASE%PATHWAY INTERACTION DATABASE NCI-NATURE CURATED DATA%REGULATION OF TELOMERASE	REGULATION OF TELOMERASE%PATHWAY INTERACTION DATABASE NCI-NATURE CURATED DATA%REGULATION OF TELOMERASE		60	0.274579	0.937223	0.566616	0.799632	1	2234	tags=18%, list=14%, signal=21%
TIE2 SIGNALING%REACTOME DATABASE ID RELEASE 57%210993	TIE2 SIGNALING%REACTOME DATABASE ID RELEASE 57%210993		16	0.357529	0.935892	0.550256	0.801822	1	2567	tags=31%, list=16%, signal=37%
NONHOMOLOGOUS END-JOINING (NHEJ)%REACTOME%R-HSA-5693571.1	NONHOMOLOGOUS END-JOINING (NHEJ)%REACTOME%R-HSA-5693571.1		36	0.305048	0.93567	0.560132	0.801156	1	3022	tags=28%, list=19%, signal=34%
INSULIN RECEPTOR SIGNALLING CASCADE%REACTOME DATABASE ID RELEASE 57%74751	INSULIN RECEPTOR SIGNALLING CASCADE%REACTOME DATABASE ID RELEASE 57%74751		241	0.227634	0.935274	0.615588	0.800931	1	2585	tags=19%, list=16%, signal=22%
BIOCARTA_NO1_PATHWAY%MSIGDB_C2%BIOCARTA_NO1_PATHWAY	BIOCARTA_NO1_PATHWAY%MSIGDB_C2%BIOCARTA_NO1_PATHWAY		24	0.329159	0.935133	0.550774	0.800093	1	5267	tags=46%, list=33%, signal=68%
BETA-CATENIN INDEPENDENT WNT SIGNALING%REACTOME%R-HSA-3858494.3	BETA-CATENIN INDEPENDENT WNT SIGNALING%REACTOME%R-HSA-3858494.3		126	0.244969	0.934897	0.608696	0.799489	1	2072	tags=19%, list=13%, signal=22%
PID_IL1_PATHWAY%MSIGDB_C2%PID_IL1_PATHWAY	PID_IL1_PATHWAY%MSIGDB_C2%PID_IL1_PATHWAY		34	0.306404	0.934121	0.573034	0.800284	1	1852	tags=21%, list=12%, signal=23%
HALLMARK_ALLOGRAFT_REJECTION%MSIGDB_C2%HALLMARK_ALLOGRAFT_REJECTION	HALLMARK_ALLOGRAFT_REJECTION%MSIGDB_C2%HALLMARK_ALLOGRAFT_REJECTION		167	0.233387	0.933211	0.612859	0.801497	1	4353	tags=27%, list=27%, signal=37%
REGULATION OF TLR BY ENDOGENOUS LIGAND%REACTOME%R-HSA-5686938.1	REGULATION OF TLR BY ENDOGENOUS LIGAND%REACTOME%R-HSA-5686938.1		15	0.367706	0.932125	0.567797	0.803059	1	4437	tags=33%, list=28%, signal=46%
POST NMDA RECEPTOR ACTIVATION EVENTS%REACTOME%R-HSA-438064.1	POST NMDA RECEPTOR ACTIVATION EVENTS%REACTOME%R-HSA-438064.1		32	0.30399	0.931953	0.549521	0.802319	1	3630	tags=34%, list=23%, signal=44%
BIOCARTA_GPCR_PATHWAY%MSIGDB_C2%BIOCARTA_GPCR_PATHWAY	BIOCARTA_GPCR_PATHWAY%MSIGDB_C2%BIOCARTA_GPCR_PATHWAY		29	0.308532	0.930905	0.558484	0.803857	1	3322	tags=28%, list=21%, signal=35%
NEUROTRANSMITTER RELEASE CYCLE%REACTOME DATABASE ID RELEASE 57%112310	NEUROTRANSMITTER RELEASE CYCLE%REACTOME DATABASE ID RELEASE 57%112310		44	0.285423	0.929721	0.580952	0.805656	1	3318	tags=27%, list=21%, signal=34%
CELL SURFACE INTERACTIONS AT THE VASCULAR WALL%REACTOME%R-HSA-202733.2	CELL SURFACE INTERACTIONS AT THE VASCULAR WALL%REACTOME%R-HSA-202733.2		83	0.253524	0.926669	0.6	0.811928	1	4855	tags=45%, list=30%, signal=64%
PID_PI3KCI_PATHWAY%MSIGDB_C2%PID_PI3KCI_PATHWAY	PID_PI3KCI_PATHWAY%MSIGDB_C2%PID_PI3KCI_PATHWAY		47	0.280138	0.923686	0.594595	0.818233	1	3418	tags=28%, list=21%, signal=35%
INOSITOL PHOSPHATE METABOLISM%REACTOME%R-HSA-1483249.1	INOSITOL PHOSPHATE METABOLISM%REACTOME%R-HSA-1483249.1		40	0.288183	0.923426	0.5824	0.817636	1	3507	tags=35%, list=22%, signal=45%
INTEGRATION OF ENERGY METABOLISM%REACTOME%R-HSA-163685.1	INTEGRATION OF ENERGY METABOLISM%REACTOME%R-HSA-163685.1		102	0.248898	0.922621	0.61898	0.818395	1	2608	tags=21%, list=16%, signal=24%
FAS (CD95) SIGNALING PATHWAY%PATHWAY INTERACTION DATABASE NCI-NATURE CURATED DATA%FAS (CD95) SIGNALING PATHWAY	FAS (CD95) SIGNALING PATHWAY%PATHWAY INTERACTION DATABASE NCI-NATURE CURATED DATA%FAS (CD95) SIGNALING PATHWAY		33	0.297835	0.921666	0.583861	0.81966	1	2049	tags=21%, list=13%, signal=24%
BIOCARTA_IL7_PATHWAY%MSIGDB_C2%BIOCARTA_IL7_PATHWAY	BIOCARTA_IL7_PATHWAY%MSIGDB_C2%BIOCARTA_IL7_PATHWAY		16	0.348841	0.919892	0.581851	0.822887	1	2059	tags=25%, list=13%, signal=29%
EPHB-MEDIATED FORWARD SIGNALING%REACTOME%R-HSA-3928662.1	EPHB-MEDIATED FORWARD SIGNALING%REACTOME%R-HSA-3928662.1		37	0.291802	0.919012	0.598387	0.823859	1	4067	tags=35%, list=25%, signal=47%
CCR1%IOB%CCR1	CCR1%IOB%CCR1		21	0.328024	0.918241	0.6	0.824539	1	4142	tags=29%, list=26%, signal=38%
BIOCARTA_NTHI_PATHWAY%MSIGDB_C2%BIOCARTA_NTHI_PATHWAY	BIOCARTA_NTHI_PATHWAY%MSIGDB_C2%BIOCARTA_NTHI_PATHWAY		22	0.329067	0.917941	0.586491	0.82405	1	3219	tags=27%, list=20%, signal=34%
PID_RHODOPSIN_PATHWAY%MSIGDB_C2%PID_RHODOPSIN_PATHWAY	PID_RHODOPSIN_PATHWAY%MSIGDB_C2%PID_RHODOPSIN_PATHWAY		22	0.325974	0.917038	0.568627	0.825225	1	935	tags=14%, list=6%, signal=14%
OXYTOCIN RECEPTOR MEDIATED SIGNALING PATHWAY%PANTHER PATHWAY%P04391	OXYTOCIN RECEPTOR MEDIATED SIGNALING PATHWAY%PANTHER PATHWAY%P04391		43	0.2819	0.915596	0.617323	0.827584	1	1382	tags=16%, list=9%, signal=18%
REGULATION OF FZD BY UBIQUITINATION%REACTOME%R-HSA-4641263.2	REGULATION OF FZD BY UBIQUITINATION%REACTOME%R-HSA-4641263.2		17	0.345114	0.915285	0.597293	0.827148	1	1960	tags=29%, list=12%, signal=33%
SIGNALING BY ERBB2%REACTOME DATABASE ID RELEASE 57%1227986	SIGNALING BY ERBB2%REACTOME DATABASE ID RELEASE 57%1227986		37	0.289338	0.913222	0.6032	0.831055	1	3351	tags=30%, list=21%, signal=37%
TRK RECEPTOR SIGNALING MEDIATED BY THE MAPK PATHWAY%PATHWAY INTERACTION DATABASE NCI-NATURE CURATED DATA%TRK RECEPTOR SIGNALING MEDIATED BY THE MAPK PATHWAY	TRK RECEPTOR SIGNALING MEDIATED BY THE MAPK PATHWAY%PATHWAY INTERACTION DATABASE NCI-NATURE CURATED DATA%TRK RECEPTOR SIGNALING MEDIATED BY THE MAPK PATHWAY		32	0.298729	0.912591	0.577419	0.831408	1	2002	tags=19%, list=12%, signal=21%
PID_BETA_CATENIN_NUC_PATHWAY%MSIGDB_C2%PID_BETA_CATENIN_NUC_PATHWAY	PID_BETA_CATENIN_NUC_PATHWAY%MSIGDB_C2%PID_BETA_CATENIN_NUC_PATHWAY		73	0.256182	0.912222	0.649371	0.831087	1	3561	tags=26%, list=22%, signal=33%
HS-GAG BIOSYNTHESIS%REACTOME DATABASE ID RELEASE 57%2022928	HS-GAG BIOSYNTHESIS%REACTOME DATABASE ID RELEASE 57%2022928		26	0.313556	0.911631	0.577107	0.831323	1	4686	tags=50%, list=29%, signal=71%
MUSCARINIC ACETYLCHOLINE RECEPTOR 2 AND 4 SIGNALING PATHWAY%PANTHER PATHWAY%P00043	MUSCARINIC ACETYLCHOLINE RECEPTOR 2 AND 4 SIGNALING PATHWAY%PANTHER PATHWAY%P00043		49	0.275885	0.9095	0.633181	0.835301	1	1382	tags=10%, list=9%, signal=11%
REGULATION OF CHOLESTEROL BIOSYNTHESIS BY SREBP (SREBF)%REACTOME DATABASE ID RELEASE 57%1655829	REGULATION OF CHOLESTEROL BIOSYNTHESIS BY SREBP (SREBF)%REACTOME DATABASE ID RELEASE 57%1655829		47	0.278816	0.909375	0.595016	0.834392	1	3810	tags=28%, list=24%, signal=36%
APOPTOSIS SIGNALING PATHWAY%PANTHER PATHWAY%P00006	APOPTOSIS SIGNALING PATHWAY%PANTHER PATHWAY%P00006		90	0.246541	0.90885	0.631976	0.834488	1	3115	tags=26%, list=19%, signal=32%
UNTITLED%PANTHER PATHWAY%P00019	UNTITLED%PANTHER PATHWAY%P00019		64	0.262277	0.908796	0.616766	0.833429	1	3630	tags=30%, list=23%, signal=38%
BIOCARTA_IL1R_PATHWAY%MSIGDB_C2%BIOCARTA_IL1R_PATHWAY	BIOCARTA_IL1R_PATHWAY%MSIGDB_C2%BIOCARTA_IL1R_PATHWAY		31	0.302963	0.908596	0.626582	0.832717	1	1852	tags=16%, list=12%, signal=18%
PID_FANCONI_PATHWAY%MSIGDB_C2%PID_FANCONI_PATHWAY	PID_FANCONI_PATHWAY%MSIGDB_C2%PID_FANCONI_PATHWAY		41	0.285942	0.907678	0.614439	0.833752	1	5062	tags=54%, list=32%, signal=78%
HALLMARK_UV_RESPONSE_UP%MSIGDB_C2%HALLMARK_UV_RESPONSE_UP	HALLMARK_UV_RESPONSE_UP%MSIGDB_C2%HALLMARK_UV_RESPONSE_UP		138	0.230541	0.907193	0.679487	0.833735	1	4414	tags=33%, list=28%, signal=46%
ACYL CHAIN REMODELLING OF PG%REACTOME DATABASE ID RELEASE 57%1482925	ACYL CHAIN REMODELLING OF PG%REACTOME DATABASE ID RELEASE 57%1482925		16	0.347748	0.905383	0.625216	0.836888	1	3068	tags=25%, list=19%, signal=31%
PID_MAPK_TRK_PATHWAY%MSIGDB_C2%PID_MAPK_TRK_PATHWAY	PID_MAPK_TRK_PATHWAY%MSIGDB_C2%PID_MAPK_TRK_PATHWAY		32	0.298729	0.905146	0.606365	0.836263	1	2002	tags=19%, list=12%, signal=21%
BIOCARTA_CALCINEURIN_PATHWAY%MSIGDB_C2%BIOCARTA_CALCINEURIN_PATHWAY	BIOCARTA_CALCINEURIN_PATHWAY%MSIGDB_C2%BIOCARTA_CALCINEURIN_PATHWAY		15	0.358105	0.90491	0.585739	0.835642	1	2830	tags=27%, list=18%, signal=32%
PID_HIV_NEF_PATHWAY%MSIGDB_C2%PID_HIV_NEF_PATHWAY	PID_HIV_NEF_PATHWAY%MSIGDB_C2%PID_HIV_NEF_PATHWAY		33	0.292941	0.903854	0.595506	0.836987	1	2049	tags=18%, list=13%, signal=21%
VISUAL SIGNAL TRANSDUCTION: RODS%PATHWAY INTERACTION DATABASE NCI-NATURE CURATED DATA%VISUAL SIGNAL TRANSDUCTION: RODS	VISUAL SIGNAL TRANSDUCTION: RODS%PATHWAY INTERACTION DATABASE NCI-NATURE CURATED DATA%VISUAL SIGNAL TRANSDUCTION: RODS		22	0.325974	0.901795	0.588331	0.840757	1	935	tags=14%, list=6%, signal=14%
OXIDATIVE STRESS INDUCED SENESCENCE%REACTOME%R-HSA-2559580.1	OXIDATIVE STRESS INDUCED SENESCENCE%REACTOME%R-HSA-2559580.1		60	0.259138	0.901718	0.637048	0.839763	1	3126	tags=27%, list=19%, signal=33%
PID_TXA2PATHWAY%MSIGDB_C2%PID_TXA2PATHWAY	PID_TXA2PATHWAY%MSIGDB_C2%PID_TXA2PATHWAY		56	0.258681	0.901209	0.650986	0.839781	1	871	tags=11%, list=5%, signal=11%
HORMONE-SENSITIVE LIPASE (HSL)-MEDIATED TRIACYLGLYCEROL HYDROLYSIS%REACTOME DATABASE ID RELEASE 57%163560	HORMONE-SENSITIVE LIPASE (HSL)-MEDIATED TRIACYLGLYCEROL HYDROLYSIS%REACTOME DATABASE ID RELEASE 57%163560		17	0.346063	0.899898	0.593909	0.841688	1	4754	tags=35%, list=30%, signal=50%
INTERLEUKIN-1 SIGNALING%REACTOME DATABASE ID RELEASE 57%446652	INTERLEUKIN-1 SIGNALING%REACTOME DATABASE ID RELEASE 57%446652		39	0.281011	0.899505	0.614767	0.841407	1	1852	tags=21%, list=12%, signal=23%
PID_RXR_VDR_PATHWAY%MSIGDB_C2%PID_RXR_VDR_PATHWAY	PID_RXR_VDR_PATHWAY%MSIGDB_C2%PID_RXR_VDR_PATHWAY		25	0.313159	0.897079	0.613418	0.846149	1	2208	tags=24%, list=14%, signal=28%
PHASE 0 - RAPID DEPOLARISATION%REACTOME%R-HSA-5576892.1	PHASE 0 - RAPID DEPOLARISATION%REACTOME%R-HSA-5576892.1		40	0.28159	0.896656	0.650327	0.845984	1	4882	tags=40%, list=30%, signal=57%
JAK STAT SIGNALING PATHWAY%PANTHER PATHWAY%P00038	JAK STAT SIGNALING PATHWAY%PANTHER PATHWAY%P00038		15	0.352261	0.896536	0.616949	0.845068	1	2462	tags=20%, list=15%, signal=24%
RXR AND RAR HETERODIMERIZATION WITH OTHER NUCLEAR RECEPTOR%PATHWAY INTERACTION DATABASE NCI-NATURE CURATED DATA%RXR AND RAR HETERODIMERIZATION WITH OTHER NUCLEAR RECEPTOR	RXR AND RAR HETERODIMERIZATION WITH OTHER NUCLEAR RECEPTOR%PATHWAY INTERACTION DATABASE NCI-NATURE CURATED DATA%RXR AND RAR HETERODIMERIZATION WITH OTHER NUCLEAR RECEPTOR		25	0.313159	0.894703	0.606419	0.848325	1	2208	tags=24%, list=14%, signal=28%
REGULATION OF TP53 DEGRADATION%REACTOME DATABASE ID RELEASE 57%6804757	REGULATION OF TP53 DEGRADATION%REACTOME DATABASE ID RELEASE 57%6804757		30	0.301091	0.8942	0.625	0.848393	1	2234	tags=20%, list=14%, signal=23%
D-<I>MYO< I>-INOSITOL-5-PHOSPHATE METABOLISM%HUMANCYC%PWY-6367	D-<I>MYO< I>-INOSITOL-5-PHOSPHATE METABOLISM%HUMANCYC%PWY-6367		19	0.335415	0.894139	0.618803	0.847341	1	4020	tags=47%, list=25%, signal=63%
CELL DEATH SIGNALLING VIA NRAGE, NRIF AND NADE%REACTOME DATABASE ID RELEASE 57%204998	CELL DEATH SIGNALLING VIA NRAGE, NRIF AND NADE%REACTOME DATABASE ID RELEASE 57%204998		53	0.264231	0.893394	0.659607	0.847974	1	4920	tags=36%, list=31%, signal=52%
SYNTHESIS, SECRETION, AND INACTIVATION OF GLUCAGON-LIKE PEPTIDE-1 (GLP-1)%REACTOME%R-HSA-381771.1	SYNTHESIS, SECRETION, AND INACTIVATION OF GLUCAGON-LIKE PEPTIDE-1 (GLP-1)%REACTOME%R-HSA-381771.1		18	0.331766	0.89257	0.612281	0.848767	1	2804	tags=22%, list=17%, signal=27%
LIPID AND LIPOPROTEIN METABOLISM%REACTOME%R-HSA-73923.3	LIPID AND LIPOPROTEIN METABOLISM%REACTOME%R-HSA-73923.3		91	0.243429	0.892275	0.708987	0.848308	1	4946	tags=30%, list=31%, signal=43%
REGULATION OF TP53 EXPRESSION AND DEGRADATION%REACTOME%R-HSA-6806003.1	REGULATION OF TP53 EXPRESSION AND DEGRADATION%REACTOME%R-HSA-6806003.1		31	0.294992	0.892233	0.641935	0.84719	1	2234	tags=19%, list=14%, signal=22%
SYNTHESIS OF IP3 AND IP4 IN THE CYTOSOL%REACTOME DATABASE ID RELEASE 57%1855204	SYNTHESIS OF IP3 AND IP4 IN THE CYTOSOL%REACTOME DATABASE ID RELEASE 57%1855204		24	0.313653	0.891761	0.619281	0.847085	1	5110	tags=58%, list=32%, signal=85%
INSULIN PROCESSING%REACTOME DATABASE ID RELEASE 57%264876	INSULIN PROCESSING%REACTOME DATABASE ID RELEASE 57%264876		24	0.310759	0.891159	0.624172	0.847317	1	3498	tags=29%, list=22%, signal=37%
BIOCARTA_PTDINS_PATHWAY%MSIGDB_C2%BIOCARTA_PTDINS_PATHWAY	BIOCARTA_PTDINS_PATHWAY%MSIGDB_C2%BIOCARTA_PTDINS_PATHWAY		21	0.319506	0.888389	0.628866	0.852584	1	2338	tags=29%, list=15%, signal=33%
CALCIUM SIGNALING IN THE CD4+ TCR PATHWAY%PATHWAY INTERACTION DATABASE NCI-NATURE CURATED DATA%CALCIUM SIGNALING IN THE CD4+ TCR PATHWAY	CALCIUM SIGNALING IN THE CD4+ TCR PATHWAY%PATHWAY INTERACTION DATABASE NCI-NATURE CURATED DATA%CALCIUM SIGNALING IN THE CD4+ TCR PATHWAY		23	0.316424	0.887578	0.625817	0.853327	1	4675	tags=35%, list=29%, signal=49%
TOLL RECEPTOR SIGNALING PATHWAY%PANTHER PATHWAY%P00054	TOLL RECEPTOR SIGNALING PATHWAY%PANTHER PATHWAY%P00054		38	0.274418	0.886903	0.636513	0.853693	1	3906	tags=29%, list=24%, signal=38%
HUNTINGTON DISEASE%PANTHER PATHWAY%P00029	HUNTINGTON DISEASE%PANTHER PATHWAY%P00029		102	0.236066	0.885856	0.693481	0.854975	1	1829	tags=15%, list=11%, signal=16%
REGULATION OF INSULIN SECRETION%REACTOME DATABASE ID RELEASE 57%422356	REGULATION OF INSULIN SECRETION%REACTOME DATABASE ID RELEASE 57%422356		73	0.246566	0.884533	0.678519	0.856957	1	1540	tags=14%, list=10%, signal=15%
RIP-MEDIATED NFKB ACTIVATION VIA ZBP1%REACTOME DATABASE ID RELEASE 57%1810476	RIP-MEDIATED NFKB ACTIVATION VIA ZBP1%REACTOME DATABASE ID RELEASE 57%1810476		18	0.325482	0.883672	0.631295	0.857714	1	1906	tags=28%, list=12%, signal=31%
FANCONI ANEMIA PATHWAY%PATHWAY INTERACTION DATABASE NCI-NATURE CURATED DATA%FANCONI ANEMIA PATHWAY	FANCONI ANEMIA PATHWAY%PATHWAY INTERACTION DATABASE NCI-NATURE CURATED DATA%FANCONI ANEMIA PATHWAY		41	0.271705	0.883134	0.644654	0.857778	1	5062	tags=51%, list=32%, signal=75%
CYTOCHROME P450 - ARRANGED BY SUBSTRATE TYPE%REACTOME DATABASE ID RELEASE 57%211897	CYTOCHROME P450 - ARRANGED BY SUBSTRATE TYPE%REACTOME DATABASE ID RELEASE 57%211897		39	0.275254	0.882651	0.659128	0.857817	1	1497	tags=15%, list=9%, signal=17%
ACTIVATION OF MATRIX METALLOPROTEINASES%REACTOME%R-HSA-1592389.1	ACTIVATION OF MATRIX METALLOPROTEINASES%REACTOME%R-HSA-1592389.1		24	0.310327	0.882016	0.625592	0.858106	1	1591	tags=21%, list=10%, signal=23%
REGULATION OF NUCLEAR BETA CATENIN SIGNALING AND TARGET GENE TRANSCRIPTION%PATHWAY INTERACTION DATABASE NCI-NATURE CURATED DATA%REGULATION OF NUCLEAR BETA CATENIN SIGNALING AND TARGET GENE TRANSCRIPTION	REGULATION OF NUCLEAR BETA CATENIN SIGNALING AND TARGET GENE TRANSCRIPTION%PATHWAY INTERACTION DATABASE NCI-NATURE CURATED DATA%REGULATION OF NUCLEAR BETA CATENIN SIGNALING AND TARGET GENE TRANSCRIPTION		73	0.247101	0.881935	0.677941	0.857105	1	3561	tags=25%, list=22%, signal=32%
RESOLUTION OF D-LOOP STRUCTURES THROUGH HOLLIDAY JUNCTION INTERMEDIATES%REACTOME DATABASE ID RELEASE 57%5693568	RESOLUTION OF D-LOOP STRUCTURES THROUGH HOLLIDAY JUNCTION INTERMEDIATES%REACTOME DATABASE ID RELEASE 57%5693568		28	0.297144	0.881284	0.640523	0.857442	1	4744	tags=39%, list=30%, signal=56%
BIOCARTA_BIOPEPTIDES_PATHWAY%MSIGDB_C2%BIOCARTA_BIOPEPTIDES_PATHWAY	BIOCARTA_BIOPEPTIDES_PATHWAY%MSIGDB_C2%BIOCARTA_BIOPEPTIDES_PATHWAY		36	0.278914	0.880823	0.631746	0.857282	1	3488	tags=31%, list=22%, signal=39%
EPH-EPHRIN SIGNALING%REACTOME DATABASE ID RELEASE 57%2682334	EPH-EPHRIN SIGNALING%REACTOME DATABASE ID RELEASE 57%2682334		82	0.23963	0.879962	0.704374	0.858069	1	3276	tags=24%, list=20%, signal=30%
PID_INTEGRIN_A4B1_PATHWAY%MSIGDB_C2%PID_INTEGRIN_A4B1_PATHWAY	PID_INTEGRIN_A4B1_PATHWAY%MSIGDB_C2%PID_INTEGRIN_A4B1_PATHWAY		33	0.2841	0.878136	0.667221	0.861135	1	4586	tags=42%, list=29%, signal=59%
ALPHA-SYNUCLEIN SIGNALING%PATHWAY INTERACTION DATABASE NCI-NATURE CURATED DATA%ALPHA-SYNUCLEIN SIGNALING	ALPHA-SYNUCLEIN SIGNALING%PATHWAY INTERACTION DATABASE NCI-NATURE CURATED DATA%ALPHA-SYNUCLEIN SIGNALING		28	0.296033	0.877392	0.667241	0.861602	1	1107	tags=18%, list=7%, signal=19%
P75 NTR RECEPTOR-MEDIATED SIGNALLING%REACTOME DATABASE ID RELEASE 57%193704	P75 NTR RECEPTOR-MEDIATED SIGNALLING%REACTOME DATABASE ID RELEASE 57%193704		72	0.246217	0.877301	0.684831	0.860643	1	3397	tags=25%, list=21%, signal=32%
P53 PATHWAY FEEDBACK LOOPS 2%PANTHER PATHWAY%P04398	P53 PATHWAY FEEDBACK LOOPS 2%PANTHER PATHWAY%P04398		38	0.280344	0.876886	0.690554	0.860388	1	3100	tags=26%, list=19%, signal=33%
PID_DELTA_NP63_PATHWAY%MSIGDB_C2%PID_DELTA_NP63_PATHWAY	PID_DELTA_NP63_PATHWAY%MSIGDB_C2%PID_DELTA_NP63_PATHWAY		40	0.275091	0.876775	0.674016	0.859482	1	4435	tags=35%, list=28%, signal=48%
IL2-MEDIATED SIGNALING EVENTS%PATHWAY INTERACTION DATABASE NCI-NATURE CURATED DATA%IL2-MEDIATED SIGNALING EVENTS	IL2-MEDIATED SIGNALING EVENTS%PATHWAY INTERACTION DATABASE NCI-NATURE CURATED DATA%IL2-MEDIATED SIGNALING EVENTS		50	0.266922	0.876351	0.688073	0.859288	1	1057	tags=12%, list=7%, signal=13%
SYNTHESIS OF BILE ACIDS AND BILE SALTS VIA 7ALPHA-HYDROXYCHOLESTEROL%REACTOME DATABASE ID RELEASE 57%193368	SYNTHESIS OF BILE ACIDS AND BILE SALTS VIA 7ALPHA-HYDROXYCHOLESTEROL%REACTOME DATABASE ID RELEASE 57%193368		19	0.319086	0.875301	0.633333	0.860459	1	5397	tags=53%, list=34%, signal=79%
SIGNALING BY NOTCH2%REACTOME%R-HSA-1980145.2	SIGNALING BY NOTCH2%REACTOME%R-HSA-1980145.2		24	0.303884	0.873302	0.66113	0.863733	1	2995	tags=29%, list=19%, signal=36%
BDNF%IOB%BDNF	BDNF%IOB%BDNF		44	0.269165	0.87327	0.677019	0.862636	1	640	tags=9%, list=4%, signal=9%
RESOLUTION OF D-LOOP STRUCTURES%REACTOME%R-HSA-5693537.1	RESOLUTION OF D-LOOP STRUCTURES%REACTOME%R-HSA-5693537.1		28	0.297144	0.87214	0.645367	0.863958	1	4744	tags=39%, list=30%, signal=56%
PID_IL2_1PATHWAY%MSIGDB_C2%PID_IL2_1PATHWAY	PID_IL2_1PATHWAY%MSIGDB_C2%PID_IL2_1PATHWAY		51	0.263582	0.872039	0.688073	0.863035	1	1057	tags=12%, list=7%, signal=13%
SPHINGOLIPID DE NOVO BIOSYNTHESIS%REACTOME%R-HSA-1660661.3	SPHINGOLIPID DE NOVO BIOSYNTHESIS%REACTOME%R-HSA-1660661.3		32	0.2851	0.870448	0.662207	0.865586	1	3881	tags=31%, list=24%, signal=41%
VALIDATED TRANSCRIPTIONAL TARGETS OF DELTANP63 ISOFORMS%PATHWAY INTERACTION DATABASE NCI-NATURE CURATED DATA%VALIDATED TRANSCRIPTIONAL TARGETS OF DELTANP63 ISOFORMS	VALIDATED TRANSCRIPTIONAL TARGETS OF DELTANP63 ISOFORMS%PATHWAY INTERACTION DATABASE NCI-NATURE CURATED DATA%VALIDATED TRANSCRIPTIONAL TARGETS OF DELTANP63 ISOFORMS		40	0.275091	0.870265	0.699387	0.864794	1	4435	tags=35%, list=28%, signal=48%
AMYLOID FIBER FORMATION%REACTOME%R-HSA-977225.3	AMYLOID FIBER FORMATION%REACTOME%R-HSA-977225.3		36	0.27388	0.869881	0.681529	0.864487	1	4986	tags=44%, list=31%, signal=64%
SIGNALING BY RHO GTPASES%REACTOME DATABASE ID RELEASE 57%194315	SIGNALING BY RHO GTPASES%REACTOME DATABASE ID RELEASE 57%194315		317	0.2035	0.869432	0.834379	0.8643	1	3561	tags=23%, list=22%, signal=29%
PID_BMP_PATHWAY%MSIGDB_C2%PID_BMP_PATHWAY	PID_BMP_PATHWAY%MSIGDB_C2%PID_BMP_PATHWAY		40	0.269353	0.868143	0.676328	0.8661	1	39	tags=5%, list=0%, signal=5%
ENDOGENOUS TLR SIGNALING%PATHWAY INTERACTION DATABASE NCI-NATURE CURATED DATA%ENDOGENOUS TLR SIGNALING	ENDOGENOUS TLR SIGNALING%PATHWAY INTERACTION DATABASE NCI-NATURE CURATED DATA%ENDOGENOUS TLR SIGNALING		21	0.311226	0.867975	0.652921	0.865343	1	3906	tags=38%, list=24%, signal=50%
SIGNALING BY PTK6%REACTOME%R-HSA-8848021.1	SIGNALING BY PTK6%REACTOME%R-HSA-8848021.1		58	0.252553	0.86633	0.694042	0.867893	1	2462	tags=22%, list=15%, signal=26%
MEIOSIS%REACTOME%R-HSA-1500620.1	MEIOSIS%REACTOME%R-HSA-1500620.1		62	0.2491	0.866218	0.714286	0.866995	1	2918	tags=23%, list=18%, signal=27%
TGF-BETA RECEPTOR SIGNALING ACTIVATES SMADS%REACTOME DATABASE ID RELEASE 57%2173789	TGF-BETA RECEPTOR SIGNALING ACTIVATES SMADS%REACTOME DATABASE ID RELEASE 57%2173789		26	0.301392	0.865166	0.67608	0.868176	1	3219	tags=27%, list=20%, signal=34%
PID_ILK_PATHWAY%MSIGDB_C2%PID_ILK_PATHWAY	PID_ILK_PATHWAY%MSIGDB_C2%PID_ILK_PATHWAY		39	0.271506	0.863894	0.661342	0.869819	1	2338	tags=21%, list=15%, signal=24%
CXCR4%IOB%CXCR4	CXCR4%IOB%CXCR4		84	0.237382	0.863709	0.708459	0.869049	1	2689	tags=20%, list=17%, signal=24%
INTEGRIN-LINKED KINASE SIGNALING%PATHWAY INTERACTION DATABASE NCI-NATURE CURATED DATA%INTEGRIN-LINKED KINASE SIGNALING	INTEGRIN-LINKED KINASE SIGNALING%PATHWAY INTERACTION DATABASE NCI-NATURE CURATED DATA%INTEGRIN-LINKED KINASE SIGNALING		39	0.271506	0.860206	0.685	0.875617	1	2338	tags=21%, list=15%, signal=24%
ALPHA4 BETA1 INTEGRIN SIGNALING EVENTS%PATHWAY INTERACTION DATABASE NCI-NATURE CURATED DATA%ALPHA4 BETA1 INTEGRIN SIGNALING EVENTS	ALPHA4 BETA1 INTEGRIN SIGNALING EVENTS%PATHWAY INTERACTION DATABASE NCI-NATURE CURATED DATA%ALPHA4 BETA1 INTEGRIN SIGNALING EVENTS		33	0.2841	0.859095	0.683465	0.876933	1	4586	tags=42%, list=29%, signal=59%
PID_TOLL_ENDOGENOUS_PATHWAY%MSIGDB_C2%PID_TOLL_ENDOGENOUS_PATHWAY	PID_TOLL_ENDOGENOUS_PATHWAY%MSIGDB_C2%PID_TOLL_ENDOGENOUS_PATHWAY		21	0.311226	0.858646	0.660066	0.876693	1	3906	tags=38%, list=24%, signal=50%
GLYCOLYSIS I%HUMANCYC%GLYCOLYSIS	GLYCOLYSIS I%HUMANCYC%GLYCOLYSIS		18	0.316176	0.857888	0.684474	0.877136	1	1314	tags=17%, list=8%, signal=18%
PID_ALPHA_SYNUCLEIN_PATHWAY%MSIGDB_C2%PID_ALPHA_SYNUCLEIN_PATHWAY	PID_ALPHA_SYNUCLEIN_PATHWAY%MSIGDB_C2%PID_ALPHA_SYNUCLEIN_PATHWAY		31	0.282342	0.857635	0.692182	0.876534	1	1107	tags=16%, list=7%, signal=17%
PID_FAS_PATHWAY%MSIGDB_C2%PID_FAS_PATHWAY	PID_FAS_PATHWAY%MSIGDB_C2%PID_FAS_PATHWAY		35	0.279325	0.857485	0.706169	0.875704	1	3167	tags=29%, list=20%, signal=36%
PI3K CASCADE%REACTOME DATABASE ID RELEASE 57%109704	PI3K CASCADE%REACTOME DATABASE ID RELEASE 57%109704		65	0.24761	0.856719	0.721885	0.87628	1	2551	tags=18%, list=16%, signal=22%
RETINOID METABOLISM AND TRANSPORT%REACTOME%R-HSA-975634.1	RETINOID METABOLISM AND TRANSPORT%REACTOME%R-HSA-975634.1		36	0.271695	0.855279	0.7088	0.878196	1	4102	tags=33%, list=26%, signal=45%
INCRETIN SYNTHESIS, SECRETION, AND INACTIVATION%REACTOME DATABASE ID RELEASE 57%400508	INCRETIN SYNTHESIS, SECRETION, AND INACTIVATION%REACTOME DATABASE ID RELEASE 57%400508		21	0.313329	0.854546	0.700669	0.878563	1	2804	tags=19%, list=17%, signal=23%
DOWNREGULATION OF TGF-BETA RECEPTOR SIGNALING%REACTOME%R-HSA-2173788.1	DOWNREGULATION OF TGF-BETA RECEPTOR SIGNALING%REACTOME%R-HSA-2173788.1		21	0.304498	0.854449	0.677249	0.877611	1	2912	tags=24%, list=18%, signal=29%
ZBP1(DAI) MEDIATED INDUCTION OF TYPE I IFNS%REACTOME DATABASE ID RELEASE 57%1606322	ZBP1(DAI) MEDIATED INDUCTION OF TYPE I IFNS%REACTOME DATABASE ID RELEASE 57%1606322		22	0.308304	0.85427	0.687919	0.876869	1	3339	tags=41%, list=21%, signal=52%
ST_MYOCYTE_AD_PATHWAY%MSIGDB_C2%ST_MYOCYTE_AD_PATHWAY	ST_MYOCYTE_AD_PATHWAY%MSIGDB_C2%ST_MYOCYTE_AD_PATHWAY		25	0.291622	0.853657	0.672598	0.876995	1	3553	tags=32%, list=22%, signal=41%
BMP RECEPTOR SIGNALING%PATHWAY INTERACTION DATABASE NCI-NATURE CURATED DATA%BMP RECEPTOR SIGNALING	BMP RECEPTOR SIGNALING%PATHWAY INTERACTION DATABASE NCI-NATURE CURATED DATA%BMP RECEPTOR SIGNALING		40	0.269353	0.853383	0.729002	0.8764	1	39	tags=5%, list=0%, signal=5%
TRP CHANNELS%REACTOME%R-HSA-3295583.1	TRP CHANNELS%REACTOME%R-HSA-3295583.1		25	0.294425	0.852217	0.675987	0.877651	1	4070	tags=36%, list=25%, signal=48%
PID_TCR_CALCIUM_PATHWAY%MSIGDB_C2%PID_TCR_CALCIUM_PATHWAY	PID_TCR_CALCIUM_PATHWAY%MSIGDB_C2%PID_TCR_CALCIUM_PATHWAY		25	0.296984	0.847731	0.682968	0.885914	1	1095	tags=12%, list=7%, signal=13%
BIOCARTA_RAC1_PATHWAY%MSIGDB_C2%BIOCARTA_RAC1_PATHWAY	BIOCARTA_RAC1_PATHWAY%MSIGDB_C2%BIOCARTA_RAC1_PATHWAY		19	0.30807	0.847433	0.661102	0.88542	1	3488	tags=32%, list=22%, signal=40%
PID_S1P_META_PATHWAY%MSIGDB_C2%PID_S1P_META_PATHWAY	PID_S1P_META_PATHWAY%MSIGDB_C2%PID_S1P_META_PATHWAY		21	0.30397	0.847224	0.679181	0.884693	1	3514	tags=33%, list=22%, signal=43%
SPHINGOSINE 1-PHOSPHATE (S1P) PATHWAY%PATHWAY INTERACTION DATABASE NCI-NATURE CURATED DATA%SPHINGOSINE 1-PHOSPHATE (S1P) PATHWAY	SPHINGOSINE 1-PHOSPHATE (S1P) PATHWAY%PATHWAY INTERACTION DATABASE NCI-NATURE CURATED DATA%SPHINGOSINE 1-PHOSPHATE (S1P) PATHWAY		21	0.30397	0.84684	0.690049	0.884365	1	3514	tags=33%, list=22%, signal=43%
ID%IOB%ID	ID%IOB%ID		26	0.291162	0.844976	0.684124	0.887049	1	2739	tags=19%, list=17%, signal=23%
HOST INTERACTIONS WITH INFLUENZA FACTORS%REACTOME DATABASE ID RELEASE 57%168253	HOST INTERACTIONS WITH INFLUENZA FACTORS%REACTOME DATABASE ID RELEASE 57%168253		32	0.275789	0.84422	0.717496	0.887433	1	2464	tags=16%, list=15%, signal=18%
CCR7%IOB%CCR7	CCR7%IOB%CCR7		18	0.307534	0.843581	0.673913	0.887581	1	1575	tags=17%, list=10%, signal=18%
SYNTHESIS OF PIPS AT THE PLASMA MEMBRANE%REACTOME DATABASE ID RELEASE 57%1660499	SYNTHESIS OF PIPS AT THE PLASMA MEMBRANE%REACTOME DATABASE ID RELEASE 57%1660499		31	0.279667	0.842131	0.710611	0.889391	1	3684	tags=35%, list=23%, signal=46%
PID_HEDGEHOG_2PATHWAY%MSIGDB_C2%PID_HEDGEHOG_2PATHWAY	PID_HEDGEHOG_2PATHWAY%MSIGDB_C2%PID_HEDGEHOG_2PATHWAY		22	0.298974	0.838062	0.716724	0.896579	1	3026	tags=27%, list=19%, signal=34%
CASPASE ACTIVATION VIA EXTRINSIC APOPTOTIC SIGNALIG PATHWAY%REACTOME%R-HSA-5357769.1	CASPASE ACTIVATION VIA EXTRINSIC APOPTOTIC SIGNALIG PATHWAY%REACTOME%R-HSA-5357769.1		24	0.29473	0.837443	0.687919	0.896643	1	2314	tags=21%, list=14%, signal=24%
BIOCARTA_GCR_PATHWAY%MSIGDB_C2%BIOCARTA_GCR_PATHWAY	BIOCARTA_GCR_PATHWAY%MSIGDB_C2%BIOCARTA_GCR_PATHWAY		15	0.324759	0.836173	0.690017	0.898077	1	4069	tags=33%, list=25%, signal=45%
SURFACTANT METABOLISM%REACTOME DATABASE ID RELEASE 57%5683826	SURFACTANT METABOLISM%REACTOME DATABASE ID RELEASE 57%5683826		22	0.297956	0.835955	0.719355	0.897345	1	1333	tags=14%, list=8%, signal=15%
NETRIN-MEDIATED SIGNALING EVENTS%PATHWAY INTERACTION DATABASE NCI-NATURE CURATED DATA%NETRIN-MEDIATED SIGNALING EVENTS	NETRIN-MEDIATED SIGNALING EVENTS%PATHWAY INTERACTION DATABASE NCI-NATURE CURATED DATA%NETRIN-MEDIATED SIGNALING EVENTS		28	0.280987	0.835695	0.728455	0.89671	1	6467	tags=64%, list=40%, signal=108%
CELL-CELL JUNCTION ORGANIZATION%REACTOME DATABASE ID RELEASE 57%421270	CELL-CELL JUNCTION ORGANIZATION%REACTOME DATABASE ID RELEASE 57%421270		51	0.249327	0.834283	0.765413	0.898343	1	3995	tags=31%, list=25%, signal=42%
WNT%IOB%WNT	WNT%IOB%WNT		113	0.21676	0.831143	0.813235	0.90344	1	3691	tags=28%, list=23%, signal=37%
INTERLEUKIN SIGNALING PATHWAY%PANTHER PATHWAY%P00036	INTERLEUKIN SIGNALING PATHWAY%PANTHER PATHWAY%P00036		85	0.227968	0.830964	0.810047	0.902649	1	2462	tags=16%, list=15%, signal=19%
NEGATIVE REGULATION OF TCF-DEPENDENT SIGNALING BY WNT LIGAND ANTAGONISTS%REACTOME DATABASE ID RELEASE 57%3772470	NEGATIVE REGULATION OF TCF-DEPENDENT SIGNALING BY WNT LIGAND ANTAGONISTS%REACTOME DATABASE ID RELEASE 57%3772470		15	0.321406	0.830676	0.694859	0.90205	1	4075	tags=47%, list=25%, signal=63%
POLO-LIKE KINASE MEDIATED EVENTS%REACTOME DATABASE ID RELEASE 57%156711	POLO-LIKE KINASE MEDIATED EVENTS%REACTOME DATABASE ID RELEASE 57%156711		15	0.321165	0.829941	0.687606	0.902336	1	3386	tags=33%, list=21%, signal=42%
PID_VEGFR1_2_PATHWAY%MSIGDB_C2%PID_VEGFR1_2_PATHWAY	PID_VEGFR1_2_PATHWAY%MSIGDB_C2%PID_VEGFR1_2_PATHWAY		64	0.237635	0.828046	0.755486	0.90496	1	2246	tags=20%, list=14%, signal=24%
SIGNALING EVENTS MEDIATED BY THE HEDGEHOG FAMILY%PATHWAY INTERACTION DATABASE NCI-NATURE CURATED DATA%SIGNALING EVENTS MEDIATED BY THE HEDGEHOG FAMILY	SIGNALING EVENTS MEDIATED BY THE HEDGEHOG FAMILY%PATHWAY INTERACTION DATABASE NCI-NATURE CURATED DATA%SIGNALING EVENTS MEDIATED BY THE HEDGEHOG FAMILY		22	0.298974	0.827669	0.699842	0.904552	1	3026	tags=27%, list=19%, signal=34%
WNT%NETPATH%WNT	WNT%NETPATH%WNT		114	0.215197	0.825641	0.845133	0.907258	1	3691	tags=28%, list=23%, signal=36%
EPHRIN SIGNALING%REACTOME DATABASE ID RELEASE 57%3928664	EPHRIN SIGNALING%REACTOME DATABASE ID RELEASE 57%3928664		17	0.315463	0.824284	0.70489	0.908795	1	2660	tags=24%, list=17%, signal=28%
N-GLYCAN ANTENNAE ELONGATION%REACTOME%R-HSA-975577.1	N-GLYCAN ANTENNAE ELONGATION%REACTOME%R-HSA-975577.1		15	0.325408	0.823227	0.704065	0.909642	1	3791	tags=33%, list=24%, signal=44%
PID_VEGFR1_PATHWAY%MSIGDB_C2%PID_VEGFR1_PATHWAY	PID_VEGFR1_PATHWAY%MSIGDB_C2%PID_VEGFR1_PATHWAY		26	0.279271	0.823028	0.721078	0.908866	1	2318	tags=23%, list=14%, signal=27%
VEGFR1 SPECIFIC SIGNALS%PATHWAY INTERACTION DATABASE NCI-NATURE CURATED DATA%VEGFR1 SPECIFIC SIGNALS	VEGFR1 SPECIFIC SIGNALS%PATHWAY INTERACTION DATABASE NCI-NATURE CURATED DATA%VEGFR1 SPECIFIC SIGNALS		26	0.279271	0.818759	0.731749	0.915785	1	2318	tags=23%, list=14%, signal=27%
INTERFERON-GAMMA SIGNALING PATHWAY%PANTHER PATHWAY%P00035	INTERFERON-GAMMA SIGNALING PATHWAY%PANTHER PATHWAY%P00035		27	0.279342	0.818611	0.7504	0.914905	1	1575	tags=19%, list=10%, signal=21%
IL12-MEDIATED SIGNALING EVENTS%PATHWAY INTERACTION DATABASE NCI-NATURE CURATED DATA%IL12-MEDIATED SIGNALING EVENTS	IL12-MEDIATED SIGNALING EVENTS%PATHWAY INTERACTION DATABASE NCI-NATURE CURATED DATA%IL12-MEDIATED SIGNALING EVENTS		52	0.243748	0.818566	0.783019	0.913842	1	2800	tags=19%, list=17%, signal=23%
METABOLISM OF STEROID HORMONES%REACTOME%R-HSA-196071.2	METABOLISM OF STEROID HORMONES%REACTOME%R-HSA-196071.2		23	0.28961	0.817584	0.736672	0.914615	1	2268	tags=22%, list=14%, signal=25%
MAP KINASE ACTIVATION IN TLR CASCADE%REACTOME%R-HSA-450294.2	MAP KINASE ACTIVATION IN TLR CASCADE%REACTOME%R-HSA-450294.2		53	0.242031	0.816276	0.795858	0.91595	1	2800	tags=21%, list=17%, signal=25%
NS1 MEDIATED EFFECTS ON HOST PATHWAYS%REACTOME%R-HSA-168276.2	NS1 MEDIATED EFFECTS ON HOST PATHWAYS%REACTOME%R-HSA-168276.2		30	0.268896	0.815761	0.745161	0.915723	1	1406	tags=10%, list=9%, signal=11%
PID_NETRIN_PATHWAY%MSIGDB_C2%PID_NETRIN_PATHWAY	PID_NETRIN_PATHWAY%MSIGDB_C2%PID_NETRIN_PATHWAY		28	0.280987	0.814942	0.75923	0.916126	1	6467	tags=64%, list=40%, signal=108%
PRE-NOTCH EXPRESSION AND PROCESSING%REACTOME%R-HSA-1912422.1	PRE-NOTCH EXPRESSION AND PROCESSING%REACTOME%R-HSA-1912422.1		40	0.254597	0.813208	0.779845	0.918089	1	3189	tags=30%, list=20%, signal=37%
BIOCARTA_P53HYPOXIA_PATHWAY%MSIGDB_C2%BIOCARTA_P53HYPOXIA_PATHWAY	BIOCARTA_P53HYPOXIA_PATHWAY%MSIGDB_C2%BIOCARTA_P53HYPOXIA_PATHWAY		19	0.299267	0.813153	0.742089	0.917041	1	2830	tags=37%, list=18%, signal=45%
HALLMARK_XENOBIOTIC_METABOLISM%MSIGDB_C2%HALLMARK_XENOBIOTIC_METABOLISM	HALLMARK_XENOBIOTIC_METABOLISM%MSIGDB_C2%HALLMARK_XENOBIOTIC_METABOLISM		177	0.20032	0.812803	0.889189	0.916538	1	4331	tags=32%, list=27%, signal=44%
HIV-1 NEF: NEGATIVE EFFECTOR OF FAS AND TNF-ALPHA%PATHWAY INTERACTION DATABASE NCI-NATURE CURATED DATA%HIV-1 NEF: NEGATIVE EFFECTOR OF FAS AND TNF-ALPHA	HIV-1 NEF: NEGATIVE EFFECTOR OF FAS AND TNF-ALPHA%PATHWAY INTERACTION DATABASE NCI-NATURE CURATED DATA%HIV-1 NEF: NEGATIVE EFFECTOR OF FAS AND TNF-ALPHA		31	0.267934	0.810097	0.760067	0.920416	1	3115	tags=23%, list=19%, signal=28%
ST_GA13_PATHWAY%MSIGDB_C2%ST_GA13_PATHWAY	ST_GA13_PATHWAY%MSIGDB_C2%ST_GA13_PATHWAY		32	0.264227	0.805812	0.758333	0.926842	1	1012	tags=13%, list=6%, signal=13%
PID_CD8_TCR_PATHWAY%MSIGDB_C2%PID_CD8_TCR_PATHWAY	PID_CD8_TCR_PATHWAY%MSIGDB_C2%PID_CD8_TCR_PATHWAY		51	0.238884	0.804659	0.81891	0.927716	1	543	tags=10%, list=3%, signal=10%
SIGNALING EVENTS MEDIATED BY VEGFR1 AND VEGFR2%PATHWAY INTERACTION DATABASE NCI-NATURE CURATED DATA%SIGNALING EVENTS MEDIATED BY VEGFR1 AND VEGFR2	SIGNALING EVENTS MEDIATED BY VEGFR1 AND VEGFR2%PATHWAY INTERACTION DATABASE NCI-NATURE CURATED DATA%SIGNALING EVENTS MEDIATED BY VEGFR1 AND VEGFR2		60	0.232244	0.801329	0.835799	0.932463	1	2246	tags=20%, list=14%, signal=23%
PID_IL23_PATHWAY%MSIGDB_C2%PID_IL23_PATHWAY	PID_IL23_PATHWAY%MSIGDB_C2%PID_IL23_PATHWAY		35	0.255474	0.80127	0.78268	0.931422	1	6786	tags=54%, list=42%, signal=94%
SIGNALING EVENTS MEDIATED BY FOCAL ADHESION KINASE%PATHWAY INTERACTION DATABASE NCI-NATURE CURATED DATA%SIGNALING EVENTS MEDIATED BY FOCAL ADHESION KINASE	SIGNALING EVENTS MEDIATED BY FOCAL ADHESION KINASE%PATHWAY INTERACTION DATABASE NCI-NATURE CURATED DATA%SIGNALING EVENTS MEDIATED BY FOCAL ADHESION KINASE		57	0.232852	0.799991	0.815829	0.932437	1	3240	tags=25%, list=20%, signal=31%
KITRECEPTOR%NETPATH%KITRECEPTOR	KITRECEPTOR%NETPATH%KITRECEPTOR		96	0.216504	0.797493	0.899123	0.935588	1	2692	tags=21%, list=17%, signal=25%
BIOCARTA_EDG1_PATHWAY%MSIGDB_C2%BIOCARTA_EDG1_PATHWAY	BIOCARTA_EDG1_PATHWAY%MSIGDB_C2%BIOCARTA_EDG1_PATHWAY		24	0.276987	0.796934	0.765472	0.935342	1	3295	tags=38%, list=21%, signal=47%
NOD1 2 SIGNALING PATHWAY%REACTOME DATABASE ID RELEASE 57%168638	NOD1 2 SIGNALING PATHWAY%REACTOME DATABASE ID RELEASE 57%168638		30	0.260407	0.796659	0.797407	0.93466	1	3151	tags=30%, list=20%, signal=37%
EPHA-MEDIATED GROWTH CONE COLLAPSE%REACTOME%R-HSA-3928663.1	EPHA-MEDIATED GROWTH CONE COLLAPSE%REACTOME%R-HSA-3928663.1		29	0.268475	0.79627	0.781199	0.934186	1	3066	tags=28%, list=19%, signal=34%
IL23-MEDIATED SIGNALING EVENTS%PATHWAY INTERACTION DATABASE NCI-NATURE CURATED DATA%IL23-MEDIATED SIGNALING EVENTS	IL23-MEDIATED SIGNALING EVENTS%PATHWAY INTERACTION DATABASE NCI-NATURE CURATED DATA%IL23-MEDIATED SIGNALING EVENTS		35	0.255474	0.795868	0.782677	0.933746	1	6786	tags=54%, list=42%, signal=94%
PID_IL12_2PATHWAY%MSIGDB_C2%PID_IL12_2PATHWAY	PID_IL12_2PATHWAY%MSIGDB_C2%PID_IL12_2PATHWAY		54	0.235177	0.795786	0.823052	0.932724	1	2800	tags=19%, list=17%, signal=22%
BARD1 SIGNALING EVENTS%PATHWAY INTERACTION DATABASE NCI-NATURE CURATED DATA%BARD1 SIGNALING EVENTS	BARD1 SIGNALING EVENTS%PATHWAY INTERACTION DATABASE NCI-NATURE CURATED DATA%BARD1 SIGNALING EVENTS		25	0.276724	0.795777	0.787375	0.931585	1	2234	tags=24%, list=14%, signal=28%
BIOCARTA_BCELLSURVIVAL_PATHWAY%MSIGDB_C2%BIOCARTA_BCELLSURVIVAL_PATHWAY	BIOCARTA_BCELLSURVIVAL_PATHWAY%MSIGDB_C2%BIOCARTA_BCELLSURVIVAL_PATHWAY		16	0.311115	0.795386	0.75126	0.93107	1	339	tags=13%, list=2%, signal=13%
NUCLEOTIDE-BINDING DOMAIN, LEUCINE RICH REPEAT CONTAINING RECEPTOR (NLR) SIGNALING PATHWAYS%REACTOME DATABASE ID RELEASE 57%168643	NUCLEOTIDE-BINDING DOMAIN, LEUCINE RICH REPEAT CONTAINING RECEPTOR (NLR) SIGNALING PATHWAYS%REACTOME DATABASE ID RELEASE 57%168643		48	0.245082	0.794912	0.806061	0.930725	1	3201	tags=29%, list=20%, signal=36%
DE NOVO PURINE BIOSYNTHESIS%PANTHER PATHWAY%P02738	DE NOVO PURINE BIOSYNTHESIS%PANTHER PATHWAY%P02738		22	0.28119	0.794319	0.791379	0.930581	1	282	tags=9%, list=2%, signal=9%
BIOCARTA_NKT_PATHWAY%MSIGDB_C2%BIOCARTA_NKT_PATHWAY	BIOCARTA_NKT_PATHWAY%MSIGDB_C2%BIOCARTA_NKT_PATHWAY		24	0.280586	0.793405	0.773312	0.930891	1	1593	tags=17%, list=10%, signal=18%
RHO GTPASES ACTIVATE ROCKS%REACTOME DATABASE ID RELEASE 57%5627117	RHO GTPASES ACTIVATE ROCKS%REACTOME DATABASE ID RELEASE 57%5627117		16	0.306376	0.792077	0.76661	0.931971	1	2780	tags=38%, list=17%, signal=45%
SIGNALING BY NOTCH%REACTOME%R-HSA-157118.1	SIGNALING BY NOTCH%REACTOME%R-HSA-157118.1		92	0.21502	0.791936	0.876274	0.931073	1	3291	tags=25%, list=21%, signal=31%
PID_FAK_PATHWAY%MSIGDB_C2%PID_FAK_PATHWAY	PID_FAK_PATHWAY%MSIGDB_C2%PID_FAK_PATHWAY		58	0.229874	0.791743	0.834586	0.930256	1	3240	tags=24%, list=20%, signal=30%
PID_BARD1_PATHWAY%MSIGDB_C2%PID_BARD1_PATHWAY	PID_BARD1_PATHWAY%MSIGDB_C2%PID_BARD1_PATHWAY		25	0.276724	0.790746	0.770408	0.930821	1	2234	tags=24%, list=14%, signal=28%
TCR SIGNALING IN NAIVE CD8+ T CELLS%PATHWAY INTERACTION DATABASE NCI-NATURE CURATED DATA%TCR SIGNALING IN NAIVE CD8+ T CELLS	TCR SIGNALING IN NAIVE CD8+ T CELLS%PATHWAY INTERACTION DATABASE NCI-NATURE CURATED DATA%TCR SIGNALING IN NAIVE CD8+ T CELLS		51	0.238884	0.787339	0.843318	0.935102	1	543	tags=10%, list=3%, signal=10%
THROMBOXANE A2 RECEPTOR SIGNALING%PATHWAY INTERACTION DATABASE NCI-NATURE CURATED DATA%THROMBOXANE A2 RECEPTOR SIGNALING	THROMBOXANE A2 RECEPTOR SIGNALING%PATHWAY INTERACTION DATABASE NCI-NATURE CURATED DATA%THROMBOXANE A2 RECEPTOR SIGNALING		54	0.231384	0.784825	0.82035	0.937809	1	3874	tags=26%, list=24%, signal=34%
PID_GMCSF_PATHWAY%MSIGDB_C2%PID_GMCSF_PATHWAY	PID_GMCSF_PATHWAY%MSIGDB_C2%PID_GMCSF_PATHWAY		33	0.254642	0.784759	0.812903	0.936776	1	770	tags=12%, list=5%, signal=13%
SIGNALING BY NOTCH1%REACTOME%R-HSA-1980143.2	SIGNALING BY NOTCH1%REACTOME%R-HSA-1980143.2		59	0.229856	0.783296	0.836858	0.937964	1	3460	tags=27%, list=22%, signal=34%
HYALURONAN METABOLISM%REACTOME%R-HSA-2142845.1	HYALURONAN METABOLISM%REACTOME%R-HSA-2142845.1		16	0.303905	0.782957	0.767528	0.937358	1	2844	tags=31%, list=18%, signal=38%
PID_LKB1_PATHWAY%MSIGDB_C2%PID_LKB1_PATHWAY	PID_LKB1_PATHWAY%MSIGDB_C2%PID_LKB1_PATHWAY		42	0.245151	0.782921	0.810855	0.936291	1	3319	tags=29%, list=21%, signal=36%
BIOCARTA_TCR_PATHWAY%MSIGDB_C2%BIOCARTA_TCR_PATHWAY	BIOCARTA_TCR_PATHWAY%MSIGDB_C2%BIOCARTA_TCR_PATHWAY		41	0.241178	0.781831	0.851792	0.936815	1	2338	tags=15%, list=15%, signal=17%
SUPERPATHWAY OF INOSITOL PHOSPHATE COMPOUNDS%HUMANCYC%PWY-6371	SUPERPATHWAY OF INOSITOL PHOSPHATE COMPOUNDS%HUMANCYC%PWY-6371		64	0.226366	0.781775	0.849845	0.935778	1	4442	tags=38%, list=28%, signal=52%
SA_PTEN_PATHWAY%MSIGDB_C2%SA_PTEN_PATHWAY	SA_PTEN_PATHWAY%MSIGDB_C2%SA_PTEN_PATHWAY		16	0.300319	0.780812	0.780165	0.936178	1	3117	tags=31%, list=19%, signal=39%
PID_HIF2PATHWAY%MSIGDB_C2%PID_HIF2PATHWAY	PID_HIF2PATHWAY%MSIGDB_C2%PID_HIF2PATHWAY		28	0.264078	0.778794	0.800344	0.93818	1	2167	tags=21%, list=14%, signal=25%
GLUTATHIONE CONJUGATION%REACTOME DATABASE ID RELEASE 57%156590	GLUTATHIONE CONJUGATION%REACTOME DATABASE ID RELEASE 57%156590		23	0.272724	0.778582	0.80737	0.937396	1	1529	tags=17%, list=10%, signal=19%
THYROTROPIN-RELEASING HORMONE RECEPTOR SIGNALING PATHWAY%PANTHER PATHWAY%P04394	THYROTROPIN-RELEASING HORMONE RECEPTOR SIGNALING PATHWAY%PANTHER PATHWAY%P04394		52	0.231583	0.77808	0.860841	0.937047	1	3987	tags=29%, list=25%, signal=38%
BIOCARTA_ATM_PATHWAY%MSIGDB_C2%BIOCARTA_ATM_PATHWAY	BIOCARTA_ATM_PATHWAY%MSIGDB_C2%BIOCARTA_ATM_PATHWAY		20	0.280148	0.777828	0.771382	0.936281	1	2830	tags=20%, list=18%, signal=24%
SEMA4D INDUCED CELL MIGRATION AND GROWTH-CONE COLLAPSE%REACTOME%R-HSA-416572.1	SEMA4D INDUCED CELL MIGRATION AND GROWTH-CONE COLLAPSE%REACTOME%R-HSA-416572.1		22	0.277246	0.775871	0.788732	0.938095	1	2689	tags=27%, list=17%, signal=33%
DNA DAMAGE TELOMERE STRESS INDUCED SENESCENCE%REACTOME%R-HSA-2559586.3	DNA DAMAGE TELOMERE STRESS INDUCED SENESCENCE%REACTOME%R-HSA-2559586.3		39	0.244157	0.775048	0.830482	0.93815	1	5067	tags=46%, list=32%, signal=67%
DNA DAMAGE BYPASS%REACTOME%R-HSA-73893.1	DNA DAMAGE BYPASS%REACTOME%R-HSA-73893.1		42	0.243558	0.77493	0.828711	0.937227	1	3662	tags=29%, list=23%, signal=37%
ANTIVIRAL MECHANISM BY IFN-STIMULATED GENES%REACTOME DATABASE ID RELEASE 57%1169410	ANTIVIRAL MECHANISM BY IFN-STIMULATED GENES%REACTOME DATABASE ID RELEASE 57%1169410		50	0.232928	0.773718	0.838863	0.937907	1	2814	tags=20%, list=18%, signal=24%
REELIN SIGNALING PATHWAY%PATHWAY INTERACTION DATABASE NCI-NATURE CURATED DATA%REELIN SIGNALING PATHWAY	REELIN SIGNALING PATHWAY%PATHWAY INTERACTION DATABASE NCI-NATURE CURATED DATA%REELIN SIGNALING PATHWAY		25	0.263842	0.773483	0.825879	0.93713	1	1915	tags=16%, list=12%, signal=18%
BIOCARTA_DC_PATHWAY%MSIGDB_C2%BIOCARTA_DC_PATHWAY	BIOCARTA_DC_PATHWAY%MSIGDB_C2%BIOCARTA_DC_PATHWAY		18	0.292963	0.77325	0.765203	0.936366	1	4113	tags=22%, list=26%, signal=30%
HIF-2-ALPHA TRANSCRIPTION FACTOR NETWORK%PATHWAY INTERACTION DATABASE NCI-NATURE CURATED DATA%HIF-2-ALPHA TRANSCRIPTION FACTOR NETWORK	HIF-2-ALPHA TRANSCRIPTION FACTOR NETWORK%PATHWAY INTERACTION DATABASE NCI-NATURE CURATED DATA%HIF-2-ALPHA TRANSCRIPTION FACTOR NETWORK		28	0.264078	0.773236	0.809904	0.935265	1	2167	tags=21%, list=14%, signal=25%
NOTCH%IOB%NOTCH	NOTCH%IOB%NOTCH		69	0.220544	0.771875	0.861069	0.936233	1	3291	tags=28%, list=21%, signal=34%
PID_REG_GR_PATHWAY%MSIGDB_C2%PID_REG_GR_PATHWAY	PID_REG_GR_PATHWAY%MSIGDB_C2%PID_REG_GR_PATHWAY		75	0.214952	0.770862	0.890937	0.936581	1	1818	tags=13%, list=11%, signal=15%
GLUCOCORTICOID RECEPTOR REGULATORY NETWORK%PATHWAY INTERACTION DATABASE NCI-NATURE CURATED DATA%GLUCOCORTICOID RECEPTOR REGULATORY NETWORK	GLUCOCORTICOID RECEPTOR REGULATORY NETWORK%PATHWAY INTERACTION DATABASE NCI-NATURE CURATED DATA%GLUCOCORTICOID RECEPTOR REGULATORY NETWORK		75	0.214953	0.770248	0.882801	0.936432	1	1818	tags=13%, list=11%, signal=15%
INFLAMMASOMES%REACTOME%R-HSA-622312.1	INFLAMMASOMES%REACTOME%R-HSA-622312.1		19	0.28518	0.770168	0.793548	0.935445	1	3201	tags=32%, list=20%, signal=39%
ADHERENS JUNCTIONS INTERACTIONS%REACTOME%R-HSA-418990.2	ADHERENS JUNCTIONS INTERACTIONS%REACTOME%R-HSA-418990.2		22	0.27132	0.770166	0.816667	0.934339	1	4770	tags=41%, list=30%, signal=58%
CD209 (DC-SIGN) SIGNALING%REACTOME DATABASE ID RELEASE 57%5621575	CD209 (DC-SIGN) SIGNALING%REACTOME DATABASE ID RELEASE 57%5621575		18	0.285672	0.768969	0.780405	0.934938	1	1759	tags=17%, list=11%, signal=19%
TRANSPORT OF VITAMINS, NUCLEOSIDES, AND RELATED MOLECULES%REACTOME DATABASE ID RELEASE 57%425397	TRANSPORT OF VITAMINS, NUCLEOSIDES, AND RELATED MOLECULES%REACTOME DATABASE ID RELEASE 57%425397		31	0.258608	0.768544	0.817292	0.934434	1	2592	tags=26%, list=16%, signal=31%
BIOCARTA_CASPASE_PATHWAY%MSIGDB_C2%BIOCARTA_CASPASE_PATHWAY	BIOCARTA_CASPASE_PATHWAY%MSIGDB_C2%BIOCARTA_CASPASE_PATHWAY		20	0.278471	0.767621	0.826514	0.934608	1	3115	tags=35%, list=19%, signal=43%
PEPTIDE HORMONE METABOLISM%REACTOME DATABASE ID RELEASE 57%2980736	PEPTIDE HORMONE METABOLISM%REACTOME DATABASE ID RELEASE 57%2980736		73	0.213784	0.767407	0.906667	0.933811	1	3498	tags=19%, list=22%, signal=24%
CD40%IOB%CD40	CD40%IOB%CD40		26	0.263058	0.765696	0.800336	0.935124	1	2462	tags=19%, list=15%, signal=23%
LKB1 SIGNALING EVENTS%PATHWAY INTERACTION DATABASE NCI-NATURE CURATED DATA%LKB1 SIGNALING EVENTS	LKB1 SIGNALING EVENTS%PATHWAY INTERACTION DATABASE NCI-NATURE CURATED DATA%LKB1 SIGNALING EVENTS		38	0.241895	0.76461	0.868552	0.935505	1	3319	tags=29%, list=21%, signal=36%
ISG15 ANTIVIRAL MECHANISM%REACTOME DATABASE ID RELEASE 57%1169408	ISG15 ANTIVIRAL MECHANISM%REACTOME DATABASE ID RELEASE 57%1169408		50	0.232928	0.763349	0.863354	0.936142	1	2814	tags=20%, list=18%, signal=24%
NOTCH%NETPATH%NOTCH	NOTCH%NETPATH%NOTCH		67	0.217658	0.763304	0.891462	0.935102	1	3201	tags=27%, list=20%, signal=33%
CYCLIN A B1 ASSOCIATED EVENTS DURING G2 M TRANSITION%REACTOME%R-HSA-69273.1	CYCLIN A B1 ASSOCIATED EVENTS DURING G2 M TRANSITION%REACTOME%R-HSA-69273.1		21	0.275382	0.763034	0.794454	0.934366	1	438	tags=10%, list=3%, signal=10%
WNT LIGAND BIOGENESIS AND TRAFFICKING%REACTOME%R-HSA-3238698.1	WNT LIGAND BIOGENESIS AND TRAFFICKING%REACTOME%R-HSA-3238698.1		26	0.263081	0.760735	0.830097	0.936473	1	4099	tags=31%, list=26%, signal=41%
BIOCARTA_CREB_PATHWAY%MSIGDB_C2%BIOCARTA_CREB_PATHWAY	BIOCARTA_CREB_PATHWAY%MSIGDB_C2%BIOCARTA_CREB_PATHWAY		25	0.263707	0.760243	0.824841	0.935996	1	3322	tags=28%, list=21%, signal=35%
BIOCARTA_IL12_PATHWAY%MSIGDB_C2%BIOCARTA_IL12_PATHWAY	BIOCARTA_IL12_PATHWAY%MSIGDB_C2%BIOCARTA_IL12_PATHWAY		20	0.287354	0.760179	0.812191	0.934983	1	2534	tags=20%, list=16%, signal=24%
TNF RECEPTOR SUPERFAMILY (TNFSF) MEMBERS MEDIATING NON-CANONICAL NF-KB PATHWAY%REACTOME%R-HSA-5676594.1	TNF RECEPTOR SUPERFAMILY (TNFSF) MEMBERS MEDIATING NON-CANONICAL NF-KB PATHWAY%REACTOME%R-HSA-5676594.1		16	0.288356	0.757116	0.79115	0.937856	1	4994	tags=44%, list=31%, signal=63%
COMMON PATHWAY OF FIBRIN CLOT FORMATION%REACTOME%R-HSA-140875.2	COMMON PATHWAY OF FIBRIN CLOT FORMATION%REACTOME%R-HSA-140875.2		19	0.276127	0.756694	0.834448	0.937332	1	5877	tags=53%, list=37%, signal=83%
GLUCONEOGENESIS I%HUMANCYC%GLUCONEO-PWY	GLUCONEOGENESIS I%HUMANCYC%GLUCONEO-PWY		18	0.285736	0.753963	0.810997	0.9398	1	1285	tags=17%, list=8%, signal=18%
TIGHT JUNCTION INTERACTIONS%REACTOME DATABASE ID RELEASE 57%420029	TIGHT JUNCTION INTERACTIONS%REACTOME DATABASE ID RELEASE 57%420029		29	0.252941	0.753613	0.830033	0.939129	1	4411	tags=34%, list=28%, signal=47%
MITOCHONDRIAL BIOGENESIS%REACTOME DATABASE ID RELEASE 57%1592230	MITOCHONDRIAL BIOGENESIS%REACTOME DATABASE ID RELEASE 57%1592230		44	0.231669	0.751215	0.873016	0.941137	1	2535	tags=18%, list=16%, signal=22%
BIOCARTA_ATRBRCA_PATHWAY%MSIGDB_C2%BIOCARTA_ATRBRCA_PATHWAY	BIOCARTA_ATRBRCA_PATHWAY%MSIGDB_C2%BIOCARTA_ATRBRCA_PATHWAY		18	0.275256	0.750079	0.819421	0.941413	1	4911	tags=50%, list=31%, signal=72%
HS-GAG DEGRADATION%REACTOME DATABASE ID RELEASE 57%2024096	HS-GAG DEGRADATION%REACTOME DATABASE ID RELEASE 57%2024096		18	0.284399	0.745625	0.83247	0.945967	1	3822	tags=44%, list=24%, signal=58%
ST_GAQ_PATHWAY%MSIGDB_C2%ST_GAQ_PATHWAY	ST_GAQ_PATHWAY%MSIGDB_C2%ST_GAQ_PATHWAY		26	0.255133	0.739695	0.857851	0.952143	1	1012	tags=15%, list=6%, signal=16%
PID_EPHB_FWD_PATHWAY%MSIGDB_C2%PID_EPHB_FWD_PATHWAY	PID_EPHB_FWD_PATHWAY%MSIGDB_C2%PID_EPHB_FWD_PATHWAY		38	0.236805	0.739531	0.876603	0.951211	1	3167	tags=24%, list=20%, signal=29%
PID_REELIN_PATHWAY%MSIGDB_C2%PID_REELIN_PATHWAY	PID_REELIN_PATHWAY%MSIGDB_C2%PID_REELIN_PATHWAY		26	0.254844	0.733008	0.856683	0.957462	1	3564	tags=27%, list=22%, signal=35%
METABOLISM OF VITAMINS AND COFACTORS%REACTOME%R-HSA-196854.2	METABOLISM OF VITAMINS AND COFACTORS%REACTOME%R-HSA-196854.2		125	0.190226	0.731877	0.960864	0.957615	1	3276	tags=21%, list=20%, signal=26%
SEMA4D IN SEMAPHORIN SIGNALING%REACTOME DATABASE ID RELEASE 57%400685	SEMA4D IN SEMAPHORIN SIGNALING%REACTOME DATABASE ID RELEASE 57%400685		25	0.253001	0.729842	0.849408	0.958843	1	2689	tags=24%, list=17%, signal=29%
LIPOPROTEIN METABOLISM%REACTOME DATABASE ID RELEASE 57%174824	LIPOPROTEIN METABOLISM%REACTOME DATABASE ID RELEASE 57%174824		55	0.216449	0.725844	0.906442	0.962023	1	4946	tags=31%, list=31%, signal=45%
ZINC TRANSPORTERS%REACTOME%R-HSA-435354.1	ZINC TRANSPORTERS%REACTOME%R-HSA-435354.1		17	0.273514	0.723854	0.844444	0.963057	1	3619	tags=29%, list=23%, signal=38%
CD40 CD40L SIGNALING%PATHWAY INTERACTION DATABASE NCI-NATURE CURATED DATA%CD40 CD40L SIGNALING	CD40 CD40L SIGNALING%PATHWAY INTERACTION DATABASE NCI-NATURE CURATED DATA%CD40 CD40L SIGNALING		35	0.230202	0.721004	0.888013	0.964928	1	2049	tags=14%, list=13%, signal=16%
BIOCARTA_PGC1A_PATHWAY%MSIGDB_C2%BIOCARTA_PGC1A_PATHWAY	BIOCARTA_PGC1A_PATHWAY%MSIGDB_C2%BIOCARTA_PGC1A_PATHWAY		19	0.266197	0.71757	0.85956	0.967252	1	2908	tags=21%, list=18%, signal=26%
RECYCLING PATHWAY OF L1%REACTOME%R-HSA-437239.1	RECYCLING PATHWAY OF L1%REACTOME%R-HSA-437239.1		24	0.251537	0.712944	0.876736	0.970843	1	4610	tags=42%, list=29%, signal=58%
BIOCARTA_NO2IL12_PATHWAY%MSIGDB_C2%BIOCARTA_NO2IL12_PATHWAY	BIOCARTA_NO2IL12_PATHWAY%MSIGDB_C2%BIOCARTA_NO2IL12_PATHWAY		16	0.271025	0.712201	0.872517	0.970469	1	6431	tags=63%, list=40%, signal=104%
BIOCARTA_NFAT_PATHWAY%MSIGDB_C2%BIOCARTA_NFAT_PATHWAY	BIOCARTA_NFAT_PATHWAY%MSIGDB_C2%BIOCARTA_NFAT_PATHWAY		46	0.217427	0.707703	0.905426	0.973724	1	3328	tags=22%, list=21%, signal=27%
3-PHOSPHOINOSITIDE BIOSYNTHESIS%HUMANCYC%PWY-6352	3-PHOSPHOINOSITIDE BIOSYNTHESIS%HUMANCYC%PWY-6352		24	0.248891	0.704295	0.866013	0.975624	1	3100	tags=25%, list=19%, signal=31%
SIGNALING BY CYTOSOLIC FGFR1 FUSION MUTANTS%REACTOME DATABASE ID RELEASE 57%1839117	SIGNALING BY CYTOSOLIC FGFR1 FUSION MUTANTS%REACTOME DATABASE ID RELEASE 57%1839117		15	0.278337	0.703533	0.88027	0.97516	1	2462	tags=27%, list=15%, signal=31%
ACTIVATED TAK1 MEDIATES P38 MAPK ACTIVATION%REACTOME%R-HSA-450302.1	ACTIVATED TAK1 MEDIATES P38 MAPK ACTIVATION%REACTOME%R-HSA-450302.1		16	0.271457	0.703257	0.852405	0.974305	1	504	tags=13%, list=3%, signal=13%
PID_CMYB_PATHWAY%MSIGDB_C2%PID_CMYB_PATHWAY	PID_CMYB_PATHWAY%MSIGDB_C2%PID_CMYB_PATHWAY		78	0.189431	0.694056	0.977778	0.981082	1	2207	tags=12%, list=14%, signal=13%
BIOCARTA_STATHMIN_PATHWAY%MSIGDB_C2%BIOCARTA_STATHMIN_PATHWAY	BIOCARTA_STATHMIN_PATHWAY%MSIGDB_C2%BIOCARTA_STATHMIN_PATHWAY		17	0.267456	0.693999	0.884808	0.980013	1	3322	tags=24%, list=21%, signal=30%
ONCOGENE INDUCED SENESCENCE%REACTOME%R-HSA-2559585.2	ONCOGENE INDUCED SENESCENCE%REACTOME%R-HSA-2559585.2		23	0.245923	0.692314	0.895868	0.980244	1	3126	tags=26%, list=19%, signal=32%
BIOCARTA_MAL_PATHWAY%MSIGDB_C2%BIOCARTA_MAL_PATHWAY	BIOCARTA_MAL_PATHWAY%MSIGDB_C2%BIOCARTA_MAL_PATHWAY		15	0.268808	0.690113	0.880597	0.980867	1	2689	tags=20%, list=17%, signal=24%
HALLMARK_WNT_BETA_CATENIN_SIGNALING%MSIGDB_C2%HALLMARK_WNT_BETA_CATENIN_SIGNALING	HALLMARK_WNT_BETA_CATENIN_SIGNALING%MSIGDB_C2%HALLMARK_WNT_BETA_CATENIN_SIGNALING		41	0.21723	0.684811	0.935385	0.983811	1	3325	tags=24%, list=21%, signal=31%
DEFECTS IN VITAMIN AND COFACTOR METABOLISM%REACTOME DATABASE ID RELEASE 57%3296482	DEFECTS IN VITAMIN AND COFACTOR METABOLISM%REACTOME DATABASE ID RELEASE 57%3296482		18	0.257388	0.684489	0.914783	0.982935	1	1622	tags=11%, list=10%, signal=12%
PLASMA MEMBRANE ESTROGEN RECEPTOR SIGNALING%PATHWAY INTERACTION DATABASE NCI-NATURE CURATED DATA%PLASMA MEMBRANE ESTROGEN RECEPTOR SIGNALING	PLASMA MEMBRANE ESTROGEN RECEPTOR SIGNALING%PATHWAY INTERACTION DATABASE NCI-NATURE CURATED DATA%PLASMA MEMBRANE ESTROGEN RECEPTOR SIGNALING		39	0.218248	0.682406	0.9344	0.983384	1	3472	tags=26%, list=22%, signal=33%
FOXA2 AND FOXA3 TRANSCRIPTION FACTOR NETWORKS%PATHWAY INTERACTION DATABASE NCI-NATURE CURATED DATA%FOXA2 AND FOXA3 TRANSCRIPTION FACTOR NETWORKS	FOXA2 AND FOXA3 TRANSCRIPTION FACTOR NETWORKS%PATHWAY INTERACTION DATABASE NCI-NATURE CURATED DATA%FOXA2 AND FOXA3 TRANSCRIPTION FACTOR NETWORKS		41	0.210317	0.678205	0.952922	0.985381	1	5300	tags=32%, list=33%, signal=47%
PID_ER_NONGENOMIC_PATHWAY%MSIGDB_C2%PID_ER_NONGENOMIC_PATHWAY	PID_ER_NONGENOMIC_PATHWAY%MSIGDB_C2%PID_ER_NONGENOMIC_PATHWAY		40	0.2122	0.677519	0.94382	0.984787	1	721	tags=10%, list=4%, signal=10%
C-MYB TRANSCRIPTION FACTOR NETWORK%PATHWAY INTERACTION DATABASE NCI-NATURE CURATED DATA%C-MYB TRANSCRIPTION FACTOR NETWORK	C-MYB TRANSCRIPTION FACTOR NETWORK%PATHWAY INTERACTION DATABASE NCI-NATURE CURATED DATA%C-MYB TRANSCRIPTION FACTOR NETWORK		78	0.189431	0.674568	0.968085	0.985709	1	2207	tags=12%, list=14%, signal=13%
PID_HNF3B_PATHWAY%MSIGDB_C2%PID_HNF3B_PATHWAY	PID_HNF3B_PATHWAY%MSIGDB_C2%PID_HNF3B_PATHWAY		42	0.20972	0.67353	0.942529	0.985321	1	5300	tags=31%, list=33%, signal=46%
AXON GUIDANCE MEDIATED BY NETRIN%PANTHER PATHWAY%P00009	AXON GUIDANCE MEDIATED BY NETRIN%PANTHER PATHWAY%P00009		27	0.227305	0.671463	0.925687	0.985531	1	3100	tags=26%, list=19%, signal=32%
SA_CASPASE_CASCADE%MSIGDB_C2%SA_CASPASE_CASCADE	SA_CASPASE_CASCADE%MSIGDB_C2%SA_CASPASE_CASCADE		17	0.257414	0.667478	0.88835	0.987074	1	3959	tags=41%, list=25%, signal=55%
INTRAFLAGELLAR TRANSPORT%REACTOME DATABASE ID RELEASE 57%5620924	INTRAFLAGELLAR TRANSPORT%REACTOME DATABASE ID RELEASE 57%5620924		34	0.215959	0.666577	0.944541	0.98651	1	6611	tags=59%, list=41%, signal=100%
PHASE II CONJUGATION%REACTOME%R-HSA-156580.1	PHASE II CONJUGATION%REACTOME%R-HSA-156580.1		57	0.193708	0.662989	0.969889	0.987656	1	4436	tags=32%, list=28%, signal=44%
SEMA3A PAK DEPENDENT AXON REPULSION%REACTOME DATABASE ID RELEASE 57%399954	SEMA3A PAK DEPENDENT AXON REPULSION%REACTOME DATABASE ID RELEASE 57%399954		15	0.257199	0.662505	0.906096	0.986801	1	2689	tags=27%, list=17%, signal=32%
ARACHIDONIC ACID METABOLISM%REACTOME DATABASE ID RELEASE 57%2142753	ARACHIDONIC ACID METABOLISM%REACTOME DATABASE ID RELEASE 57%2142753		39	0.208801	0.661388	0.958132	0.986395	1	5211	tags=36%, list=32%, signal=53%
BIOCARTA_41BB_PATHWAY%MSIGDB_C2%BIOCARTA_41BB_PATHWAY	BIOCARTA_41BB_PATHWAY%MSIGDB_C2%BIOCARTA_41BB_PATHWAY		17	0.242328	0.653655	0.914384	0.989805	1	1057	tags=12%, list=7%, signal=13%
SUPERPATHWAY OF D-<I>MYO< I>-INOSITOL (1,4,5)-TRISPHOSPHATE METABOLISM%HUMANCYC%PWY-6358	SUPERPATHWAY OF D-<I>MYO< I>-INOSITOL (1,4,5)-TRISPHOSPHATE METABOLISM%HUMANCYC%PWY-6358		19	0.23878	0.652294	0.933913	0.989443	1	3507	tags=37%, list=22%, signal=47%
GENERATION OF SECOND MESSENGER MOLECULES%REACTOME%R-HSA-202433.2	GENERATION OF SECOND MESSENGER MOLECULES%REACTOME%R-HSA-202433.2		20	0.237471	0.649808	0.909539	0.989638	1	6644	tags=60%, list=41%, signal=102%
E2F TRANSCRIPTION FACTOR NETWORK%PATHWAY INTERACTION DATABASE NCI-NATURE CURATED DATA%E2F TRANSCRIPTION FACTOR NETWORK	E2F TRANSCRIPTION FACTOR NETWORK%PATHWAY INTERACTION DATABASE NCI-NATURE CURATED DATA%E2F TRANSCRIPTION FACTOR NETWORK		65	0.185257	0.64835	0.982063	0.989303	1	4294	tags=29%, list=27%, signal=40%
G0 AND EARLY G1%REACTOME DATABASE ID RELEASE 57%1538133	G0 AND EARLY G1%REACTOME DATABASE ID RELEASE 57%1538133		22	0.231912	0.643003	0.929766	0.990992	1	2052	tags=14%, list=13%, signal=16%
PID_E2F_PATHWAY%MSIGDB_C2%PID_E2F_PATHWAY	PID_E2F_PATHWAY%MSIGDB_C2%PID_E2F_PATHWAY		65	0.185257	0.641225	0.992331	0.990825	1	4294	tags=29%, list=27%, signal=40%
PID_NCADHERIN_PATHWAY%MSIGDB_C2%PID_NCADHERIN_PATHWAY	PID_NCADHERIN_PATHWAY%MSIGDB_C2%PID_NCADHERIN_PATHWAY		29	0.213711	0.64001	0.954545	0.990335	1	3064	tags=24%, list=19%, signal=30%
BIOCARTA_VIP_PATHWAY%MSIGDB_C2%BIOCARTA_VIP_PATHWAY	BIOCARTA_VIP_PATHWAY%MSIGDB_C2%BIOCARTA_VIP_PATHWAY		22	0.226908	0.638927	0.921875	0.989767	1	1627	tags=14%, list=10%, signal=15%
BIOCARTA_ARAP_PATHWAY%MSIGDB_C2%BIOCARTA_ARAP_PATHWAY	BIOCARTA_ARAP_PATHWAY%MSIGDB_C2%BIOCARTA_ARAP_PATHWAY		17	0.244472	0.638723	0.926995	0.988762	1	4373	tags=29%, list=27%, signal=40%
CHYLOMICRON-MEDIATED LIPID TRANSPORT%REACTOME%R-HSA-174800.4	CHYLOMICRON-MEDIATED LIPID TRANSPORT%REACTOME%R-HSA-174800.4		24	0.225201	0.634627	0.95777	0.989556	1	6264	tags=42%, list=39%, signal=68%
REGULATION OF BETA-CELL DEVELOPMENT%REACTOME DATABASE ID RELEASE 57%186712	REGULATION OF BETA-CELL DEVELOPMENT%REACTOME DATABASE ID RELEASE 57%186712		28	0.211932	0.628068	0.955	0.991391	1	2995	tags=14%, list=19%, signal=18%
N-CADHERIN SIGNALING EVENTS%PATHWAY INTERACTION DATABASE NCI-NATURE CURATED DATA%N-CADHERIN SIGNALING EVENTS	N-CADHERIN SIGNALING EVENTS%PATHWAY INTERACTION DATABASE NCI-NATURE CURATED DATA%N-CADHERIN SIGNALING EVENTS		29	0.213712	0.626707	0.97	0.990871	1	3064	tags=24%, list=19%, signal=30%
ER QUALITY CONTROL COMPARTMENT (ERQC)%REACTOME%R-HSA-901032.5	ER QUALITY CONTROL COMPARTMENT (ERQC)%REACTOME%R-HSA-901032.5		17	0.232008	0.622554	0.923077	0.991536	1	3864	tags=29%, list=24%, signal=39%
TRANSCRIPTIONAL ACTIVATION OF MITOCHONDRIAL BIOGENESIS%REACTOME DATABASE ID RELEASE 57%2151201	TRANSCRIPTIONAL ACTIVATION OF MITOCHONDRIAL BIOGENESIS%REACTOME DATABASE ID RELEASE 57%2151201		35	0.200769	0.6185	0.967846	0.991994	1	1799	tags=11%, list=11%, signal=13%
BIOCARTA_ECM_PATHWAY%MSIGDB_C2%BIOCARTA_ECM_PATHWAY	BIOCARTA_ECM_PATHWAY%MSIGDB_C2%BIOCARTA_ECM_PATHWAY		21	0.222225	0.616383	0.961083	0.991675	1	6467	tags=52%, list=40%, signal=88%
FANCONI ANEMIA PATHWAY%REACTOME DATABASE ID RELEASE 57%6783310	FANCONI ANEMIA PATHWAY%REACTOME DATABASE ID RELEASE 57%6783310		26	0.214718	0.615637	0.968699	0.990853	1	5062	tags=50%, list=32%, signal=73%
BIOCARTA_CTCF_PATHWAY%MSIGDB_C2%BIOCARTA_CTCF_PATHWAY	BIOCARTA_CTCF_PATHWAY%MSIGDB_C2%BIOCARTA_CTCF_PATHWAY		21	0.219442	0.615071	0.945091	0.989973	1	3219	tags=19%, list=20%, signal=24%
CREB PHOSPHORYLATION THROUGH THE ACTIVATION OF RAS%REACTOME DATABASE ID RELEASE 57%442742	CREB PHOSPHORYLATION THROUGH THE ACTIVATION OF RAS%REACTOME DATABASE ID RELEASE 57%442742		25	0.213631	0.612199	0.957237	0.989965	1	3553	tags=24%, list=22%, signal=31%
SIG_PIP3_SIGNALING_IN_B_LYMPHOCYTES%MSIGDB_C2%SIG_PIP3_SIGNALING_IN_B_LYMPHOCYTES	SIG_PIP3_SIGNALING_IN_B_LYMPHOCYTES%MSIGDB_C2%SIG_PIP3_SIGNALING_IN_B_LYMPHOCYTES		34	0.195681	0.60756	0.981818	0.990469	1	5110	tags=35%, list=32%, signal=52%
DISEASES OF METABOLISM%REACTOME DATABASE ID RELEASE 57%5668914	DISEASES OF METABOLISM%REACTOME DATABASE ID RELEASE 57%5668914		35	0.193248	0.602169	0.988636	0.991142	1	1622	tags=11%, list=10%, signal=13%
TIE1 TEK%IOB%TIE1 TEK	TIE1 TEK%IOB%TIE1 TEK		22	0.212099	0.594922	0.960684	0.992246	1	1678	tags=9%, list=10%, signal=10%
SYNAPTIC_VESICLE_TRAFFICKING%PANTHER PATHWAY%P05734	SYNAPTIC_VESICLE_TRAFFICKING%PANTHER PATHWAY%P05734		19	0.218196	0.592804	0.959391	0.99172	1	4733	tags=42%, list=30%, signal=60%
N-GLYCAN TRIMMING IN THE ER AND CALNEXIN CALRETICULIN CYCLE%REACTOME%R-HSA-532668.2	N-GLYCAN TRIMMING IN THE ER AND CALNEXIN CALRETICULIN CYCLE%REACTOME%R-HSA-532668.2		31	0.197812	0.592117	0.97205	0.99084	1	4161	tags=29%, list=26%, signal=39%
BIOCARTA_CYTOKINE_PATHWAY%MSIGDB_C2%BIOCARTA_CYTOKINE_PATHWAY	BIOCARTA_CYTOKINE_PATHWAY%MSIGDB_C2%BIOCARTA_CYTOKINE_PATHWAY		18	0.219773	0.578879	0.965058	0.993093	1	4441	tags=28%, list=28%, signal=38%
EPHB FORWARD SIGNALING%PATHWAY INTERACTION DATABASE NCI-NATURE CURATED DATA%EPHB FORWARD SIGNALING	EPHB FORWARD SIGNALING%PATHWAY INTERACTION DATABASE NCI-NATURE CURATED DATA%EPHB FORWARD SIGNALING		37	0.177254	0.56149	0.981453	0.995607	1	3167	tags=22%, list=20%, signal=27%
COBALAMIN (CBL, VITAMIN B12) TRANSPORT AND METABOLISM%REACTOME%R-HSA-196741.2	COBALAMIN (CBL, VITAMIN B12) TRANSPORT AND METABOLISM%REACTOME%R-HSA-196741.2		16	0.200559	0.525776	0.984694	0.999662	1	6330	tags=63%, list=39%, signal=103%
CALNEXIN CALRETICULIN CYCLE%REACTOME DATABASE ID RELEASE 57%901042	CALNEXIN CALRETICULIN CYCLE%REACTOME DATABASE ID RELEASE 57%901042		22	0.17895	0.502861	0.989744	1	1	3864	tags=23%, list=24%, signal=30%
COPI-INDEPENDENT GOLGI-TO-ER RETROGRADE TRAFFIC%REACTOME DATABASE ID RELEASE 57%6811436	COPI-INDEPENDENT GOLGI-TO-ER RETROGRADE TRAFFIC%REACTOME DATABASE ID RELEASE 57%6811436		25	0.170109	0.49696	0.99509	0.999979	1	1516	tags=8%, list=9%, signal=9%
ACYL CHAIN REMODELLING OF PS%REACTOME%R-HSA-1482801.2	ACYL CHAIN REMODELLING OF PS%REACTOME%R-HSA-1482801.2		16	0.193691	0.492808	0.989492	0.999159	1	3068	tags=19%, list=19%, signal=23%
ACTIVATION OF SMO%REACTOME DATABASE ID RELEASE 57%5635838	ACTIVATION OF SMO%REACTOME DATABASE ID RELEASE 57%5635838		16	0.181838	0.476655	0.996644	0.998982	1	3999	tags=25%, list=25%, signal=33%
KINESINS%REACTOME%R-HSA-983189.2	KINESINS%REACTOME%R-HSA-983189.2		38	0.131804	0.415116	1	0.999625	1	5223	tags=32%, list=33%, signal=47%

## Sheet: Enriched in mouse aRG
NAME	GS<br> follow link to MSigDB	GS DETAILS	SIZE	ES	NES	NOM p-val	FDR q-val	FWER p-val	RANK AT MAX	LEADING EDGE
AUTODEGRADATION OF CDH1 BY CDH1:APC C%REACTOME%R-HSA-174084.1	AUTODEGRADATION OF CDH1 BY CDH1:APC C%REACTOME%R-HSA-174084.1	Details ...	50	-0.678472	-2.46624	0	0	0	2702	tags=58%, list=17%, signal=70%
HALLMARK_OXIDATIVE_PHOSPHORYLATION%MSIGDB_C2%HALLMARK_OXIDATIVE_PHOSPHORYLATION	HALLMARK_OXIDATIVE_PHOSPHORYLATION%MSIGDB_C2%HALLMARK_OXIDATIVE_PHOSPHORYLATION	Details ...	166	-0.551516	-2.4278	0	0	0	3270	tags=57%, list=20%, signal=71%
APC C:CDH1 MEDIATED DEGRADATION OF CDC20 AND OTHER APC C:CDH1 TARGETED PROTEINS IN LATE MITOSIS EARLY G1%REACTOME%R-HSA-174178.1	APC C:CDH1 MEDIATED DEGRADATION OF CDC20 AND OTHER APC C:CDH1 TARGETED PROTEINS IN LATE MITOSIS EARLY G1%REACTOME%R-HSA-174178.1	Details ...	57	-0.644934	-2.40566	0	0	0	2702	tags=53%, list=17%, signal=63%
MAJOR PATHWAY OF RRNA PROCESSING IN THE NUCLEOLUS AND CYTOSOL%REACTOME DATABASE ID RELEASE 57%6791226	MAJOR PATHWAY OF RRNA PROCESSING IN THE NUCLEOLUS AND CYTOSOL%REACTOME DATABASE ID RELEASE 57%6791226	Details ...	102	-0.580042	-2.39588	0	0	0	4168	tags=67%, list=26%, signal=90%
RRNA PROCESSING%REACTOME%R-HSA-72312.2	RRNA PROCESSING%REACTOME%R-HSA-72312.2	Details ...	122	-0.559792	-2.39311	0	0	0	4168	tags=63%, list=26%, signal=85%
APC C:CDC20 MEDIATED DEGRADATION OF SECURIN%REACTOME DATABASE ID RELEASE 57%174154	APC C:CDC20 MEDIATED DEGRADATION OF SECURIN%REACTOME DATABASE ID RELEASE 57%174154	Details ...	52	-0.66911	-2.39277	0	0	0	2702	tags=56%, list=17%, signal=67%
RRNA PROCESSING IN THE NUCLEUS AND CYTOSOL%REACTOME DATABASE ID RELEASE 57%8868773	RRNA PROCESSING IN THE NUCLEUS AND CYTOSOL%REACTOME DATABASE ID RELEASE 57%8868773	Details ...	113	-0.57078	-2.36757	0	0	0	4168	tags=65%, list=26%, signal=87%
GLI3 IS PROCESSED TO GLI3R BY THE PROTEASOME%REACTOME DATABASE ID RELEASE 57%5610785	GLI3 IS PROCESSED TO GLI3R BY THE PROTEASOME%REACTOME DATABASE ID RELEASE 57%5610785	Details ...	46	-0.66518	-2.36622	0	0	0	2702	tags=57%, list=17%, signal=68%
DEGRADATION OF GLI2 BY THE PROTEASOME%REACTOME%R-HSA-5610783.1	DEGRADATION OF GLI2 BY THE PROTEASOME%REACTOME%R-HSA-5610783.1	Details ...	46	-0.671062	-2.35332	0	0	0	2702	tags=57%, list=17%, signal=68%
HALLMARK_MYC_TARGETS_V1%MSIGDB_C2%HALLMARK_MYC_TARGETS_V1	HALLMARK_MYC_TARGETS_V1%MSIGDB_C2%HALLMARK_MYC_TARGETS_V1	Details ...	167	-0.523043	-2.35327	0	0	0	3686	tags=47%, list=23%, signal=61%
MITOCHONDRIAL TRANSLATION ELONGATION%REACTOME%R-HSA-5389840.1	MITOCHONDRIAL TRANSLATION ELONGATION%REACTOME%R-HSA-5389840.1	Details ...	77	-0.592912	-2.34362	0	0	0	3756	tags=66%, list=23%, signal=86%
RRNA MODIFICATION IN THE NUCLEUS AND CYTOSOL%REACTOME DATABASE ID RELEASE 57%6790901	RRNA MODIFICATION IN THE NUCLEUS AND CYTOSOL%REACTOME DATABASE ID RELEASE 57%6790901	Details ...	49	-0.643339	-2.31857	0	0	0	4168	tags=73%, list=26%, signal=99%
MITOCHONDRIAL PROTEIN IMPORT%REACTOME DATABASE ID RELEASE 57%1268020	MITOCHONDRIAL PROTEIN IMPORT%REACTOME DATABASE ID RELEASE 57%1268020	Details ...	43	-0.653045	-2.31486	0	0	0	3485	tags=60%, list=22%, signal=77%
SEPARATION OF SISTER CHROMATIDS%REACTOME%R-HSA-2467813.1	SEPARATION OF SISTER CHROMATIDS%REACTOME%R-HSA-2467813.1	Details ...	140	-0.531775	-2.31376	0	0	0	2922	tags=40%, list=18%, signal=48%
UBIQUITIN-DEPENDENT DEGRADATION OF CYCLIN D1%REACTOME%R-HSA-69229.1	UBIQUITIN-DEPENDENT DEGRADATION OF CYCLIN D1%REACTOME%R-HSA-69229.1	Details ...	38	-0.674639	-2.30621	0	0	0	2702	tags=58%, list=17%, signal=69%
MITOCHONDRIAL TRANSLATION TERMINATION%REACTOME DATABASE ID RELEASE 57%5419276	MITOCHONDRIAL TRANSLATION TERMINATION%REACTOME DATABASE ID RELEASE 57%5419276	Details ...	78	-0.58268	-2.30384	0	0	0	3756	tags=64%, list=23%, signal=83%
CDC20:PHOSPHO-APC C MEDIATED DEGRADATION OF CYCLIN A%REACTOME%R-HSA-174184.1	CDC20:PHOSPHO-APC C MEDIATED DEGRADATION OF CYCLIN A%REACTOME%R-HSA-174184.1	Details ...	58	-0.620427	-2.29621	0	0	0	2716	tags=52%, list=17%, signal=62%
UBIQUITIN-DEPENDENT DEGRADATION OF CYCLIN D%REACTOME%R-HSA-75815.1	UBIQUITIN-DEPENDENT DEGRADATION OF CYCLIN D%REACTOME%R-HSA-75815.1	Details ...	38	-0.674639	-2.29117	0	0	0	2702	tags=58%, list=17%, signal=69%
MITOCHONDRIAL TRANSLATION INITIATION%REACTOME%R-HSA-5368286.1	MITOCHONDRIAL TRANSLATION INITIATION%REACTOME%R-HSA-5368286.1	Details ...	78	-0.57819	-2.28722	0	0	0	3756	tags=67%, list=23%, signal=87%
REGULATION OF APC C ACTIVATORS BETWEEN G1 S AND EARLY ANAPHASE%REACTOME DATABASE ID RELEASE 57%176408	REGULATION OF APC C ACTIVATORS BETWEEN G1 S AND EARLY ANAPHASE%REACTOME DATABASE ID RELEASE 57%176408	Details ...	65	-0.607228	-2.28561	0	0	0	2716	tags=49%, list=17%, signal=59%
APC:CDC20 MEDIATED DEGRADATION OF CELL CYCLE PROTEINS PRIOR TO SATISFATION OF THE CELL CYCLE CHECKPOINT%REACTOME%R-HSA-179419.1	APC:CDC20 MEDIATED DEGRADATION OF CELL CYCLE PROTEINS PRIOR TO SATISFATION OF THE CELL CYCLE CHECKPOINT%REACTOME%R-HSA-179419.1		59	-0.604085	-2.28394	0	0	0	2716	tags=51%, list=17%, signal=61%
VIF-MEDIATED DEGRADATION OF APOBEC3G%REACTOME DATABASE ID RELEASE 57%180585	VIF-MEDIATED DEGRADATION OF APOBEC3G%REACTOME DATABASE ID RELEASE 57%180585		39	-0.675242	-2.28091	0	0	0	2702	tags=59%, list=17%, signal=71%
MITOTIC METAPHASE AND ANAPHASE%REACTOME DATABASE ID RELEASE 57%2555396	MITOTIC METAPHASE AND ANAPHASE%REACTOME DATABASE ID RELEASE 57%2555396		149	-0.51864	-2.27707	0	0	0	2922	tags=39%, list=18%, signal=47%
MITOCHONDRIAL TRANSLATION%REACTOME DATABASE ID RELEASE 57%5368287	MITOCHONDRIAL TRANSLATION%REACTOME DATABASE ID RELEASE 57%5368287		83	-0.572421	-2.26601	0	0	0	3756	tags=64%, list=23%, signal=83%
RESPIRATORY ELECTRON TRANSPORT, ATP SYNTHESIS BY CHEMIOSMOTIC COUPLING, AND HEAT PRODUCTION BY UNCOUPLING PROTEINS.%REACTOME DATABASE ID RELEASE 57%163200	RESPIRATORY ELECTRON TRANSPORT, ATP SYNTHESIS BY CHEMIOSMOTIC COUPLING, AND HEAT PRODUCTION BY UNCOUPLING PROTEINS.%REACTOME DATABASE ID RELEASE 57%163200		84	-0.567958	-2.25312	0	0	0	3150	tags=58%, list=20%, signal=72%
CITRIC ACID CYCLE (TCA CYCLE)%REACTOME%R-HSA-71403.1	CITRIC ACID CYCLE (TCA CYCLE)%REACTOME%R-HSA-71403.1		18	-0.771151	-2.24778	0	0	0	3184	tags=83%, list=20%, signal=104%
APC C:CDC20 MEDIATED DEGRADATION OF MITOTIC PROTEINS%REACTOME DATABASE ID RELEASE 57%176409	APC C:CDC20 MEDIATED DEGRADATION OF MITOTIC PROTEINS%REACTOME DATABASE ID RELEASE 57%176409		59	-0.604085	-2.24596	0	0	0	2716	tags=51%, list=17%, signal=61%
MITOTIC ANAPHASE%REACTOME%R-HSA-68882.1	MITOTIC ANAPHASE%REACTOME%R-HSA-68882.1		148	-0.521517	-2.24568	0	0	0	2922	tags=39%, list=18%, signal=47%
SCF-BETA-TRCP MEDIATED DEGRADATION OF EMI1%REACTOME DATABASE ID RELEASE 57%174113	SCF-BETA-TRCP MEDIATED DEGRADATION OF EMI1%REACTOME DATABASE ID RELEASE 57%174113		42	-0.646948	-2.23779	0	0	0	2702	tags=52%, list=17%, signal=63%
REGULATION OF RAS BY GAPS%REACTOME%R-HSA-5658442.1	REGULATION OF RAS BY GAPS%REACTOME%R-HSA-5658442.1		53	-0.605168	-2.23725	0	0	0	2702	tags=51%, list=17%, signal=61%
ACTIVATION OF THE MRNA UPON BINDING OF THE CAP-BINDING COMPLEX AND EIFS, AND SUBSEQUENT BINDING TO 43S%REACTOME DATABASE ID RELEASE 57%72662	ACTIVATION OF THE MRNA UPON BINDING OF THE CAP-BINDING COMPLEX AND EIFS, AND SUBSEQUENT BINDING TO 43S%REACTOME DATABASE ID RELEASE 57%72662		37	-0.661799	-2.23717	0	0	0	4114	tags=65%, list=26%, signal=87%
RIBOSOMAL SCANNING AND START CODON RECOGNITION%REACTOME DATABASE ID RELEASE 57%72702	RIBOSOMAL SCANNING AND START CODON RECOGNITION%REACTOME DATABASE ID RELEASE 57%72702		36	-0.659257	-2.2314	0	4.04605e-05	0.001	4114	tags=64%, list=26%, signal=86%
APC C-MEDIATED DEGRADATION OF CELL CYCLE PROTEINS%REACTOME%R-HSA-174143.1	APC C-MEDIATED DEGRADATION OF CELL CYCLE PROTEINS%REACTOME%R-HSA-174143.1		70	-0.578735	-2.22841	0	7.79259e-05	0.002	2716	tags=47%, list=17%, signal=57%
REGULATION OF MITOTIC CELL CYCLE%REACTOME DATABASE ID RELEASE 57%453276	REGULATION OF MITOTIC CELL CYCLE%REACTOME DATABASE ID RELEASE 57%453276		70	-0.578735	-2.2259	0	7.56339e-05	0.002	2716	tags=47%, list=17%, signal=57%
RESPIRATORY ELECTRON TRANSPORT%REACTOME%R-HSA-611105.2	RESPIRATORY ELECTRON TRANSPORT%REACTOME%R-HSA-611105.2		69	-0.579587	-2.22539	0	7.3473e-05	0.002	3150	tags=57%, list=20%, signal=70%
ACTIVATION OF APC C AND APC C:CDC20 MEDIATED DEGRADATION OF MITOTIC PROTEINS%REACTOME%R-HSA-176814.1	ACTIVATION OF APC C AND APC C:CDC20 MEDIATED DEGRADATION OF MITOTIC PROTEINS%REACTOME%R-HSA-176814.1		60	-0.597867	-2.22338	0	7.1432e-05	0.002	2716	tags=50%, list=17%, signal=60%
ACTIVATION OF NF-KAPPAB IN B CELLS%REACTOME DATABASE ID RELEASE 57%1169091	ACTIVATION OF NF-KAPPAB IN B CELLS%REACTOME DATABASE ID RELEASE 57%1169091		54	-0.604177	-2.21908	0	0.000102579	0.003	2702	tags=52%, list=17%, signal=62%
REGULATION OF ACTIVATED PAK-2P34 BY PROTEASOME MEDIATED DEGRADATION%REACTOME%R-HSA-211733.1	REGULATION OF ACTIVATED PAK-2P34 BY PROTEASOME MEDIATED DEGRADATION%REACTOME%R-HSA-211733.1		37	-0.649729	-2.21894	0	9.98798e-05	0.003	2702	tags=54%, list=17%, signal=65%
VPU MEDIATED DEGRADATION OF CD4%REACTOME%R-HSA-180534.1	VPU MEDIATED DEGRADATION OF CD4%REACTOME%R-HSA-180534.1		39	-0.643684	-2.21438	0	0.000127547	0.004	2702	tags=54%, list=17%, signal=65%
DEGRADATION OF GLI1 BY THE PROTEASOME%REACTOME%R-HSA-5610780.1	DEGRADATION OF GLI1 BY THE PROTEASOME%REACTOME%R-HSA-5610780.1		45	-0.634608	-2.21293	0	0.000155472	0.005	2702	tags=53%, list=17%, signal=64%
HIV INFECTION%REACTOME DATABASE ID RELEASE 57%162906	HIV INFECTION%REACTOME DATABASE ID RELEASE 57%162906		178	-0.492672	-2.2123	0	0.00015168	0.005	2989	tags=43%, list=19%, signal=53%
TRANSLATION INITIATION COMPLEX FORMATION%REACTOME DATABASE ID RELEASE 57%72649	TRANSLATION INITIATION COMPLEX FORMATION%REACTOME DATABASE ID RELEASE 57%72649		36	-0.655929	-2.19743	0	0.000206508	0.007	4114	tags=64%, list=26%, signal=86%
AUTODEGRADATION OF THE E3 UBIQUITIN LIGASE COP1%REACTOME DATABASE ID RELEASE 57%349425	AUTODEGRADATION OF THE E3 UBIQUITIN LIGASE COP1%REACTOME DATABASE ID RELEASE 57%349425		39	-0.631445	-2.18606	0	0.000201706	0.007	2702	tags=54%, list=17%, signal=65%
THE CITRIC ACID (TCA) CYCLE AND RESPIRATORY ELECTRON TRANSPORT%REACTOME%R-HSA-1428517.1	THE CITRIC ACID (TCA) CYCLE AND RESPIRATORY ELECTRON TRANSPORT%REACTOME%R-HSA-1428517.1		125	-0.515232	-2.18413	0	0.000224618	0.008	3274	tags=54%, list=20%, signal=67%
TRANSCRIPTION OF THE HIV GENOME%REACTOME DATABASE ID RELEASE 57%167172	TRANSCRIPTION OF THE HIV GENOME%REACTOME DATABASE ID RELEASE 57%167172		57	-0.58733	-2.18004	0	0.000219626	0.008	3734	tags=63%, list=23%, signal=82%
CDK-MEDIATED PHOSPHORYLATION AND REMOVAL OF CDC6%REACTOME%R-HSA-69017.1	CDK-MEDIATED PHOSPHORYLATION AND REMOVAL OF CDC6%REACTOME%R-HSA-69017.1		38	-0.639107	-2.17958	0	0.000214852	0.008	2702	tags=53%, list=17%, signal=63%
FORMATION OF THE TERNARY COMPLEX, AND SUBSEQUENTLY, THE 43S COMPLEX%REACTOME DATABASE ID RELEASE 57%72695	FORMATION OF THE TERNARY COMPLEX, AND SUBSEQUENTLY, THE 43S COMPLEX%REACTOME DATABASE ID RELEASE 57%72695		29	-0.673767	-2.17799	0	0.00021028	0.008	4114	tags=69%, list=26%, signal=93%
NIK-->NONCANONICAL NF-KB SIGNALING%REACTOME%R-HSA-5676590.1	NIK-->NONCANONICAL NF-KB SIGNALING%REACTOME%R-HSA-5676590.1		46	-0.611707	-2.17565	0	0.0002059	0.008	2702	tags=52%, list=17%, signal=63%
REGULATION OF APOPTOSIS%REACTOME%R-HSA-169911.1	REGULATION OF APOPTOSIS%REACTOME%R-HSA-169911.1		38	-0.642447	-2.17421	0	0.000201698	0.008	2702	tags=53%, list=17%, signal=63%
CDT1 ASSOCIATION WITH THE CDC6:ORC:ORIGIN COMPLEX%REACTOME%R-HSA-68827.1	CDT1 ASSOCIATION WITH THE CDC6:ORC:ORIGIN COMPLEX%REACTOME%R-HSA-68827.1		46	-0.609803	-2.17141	0	0.000197664	0.008	2801	tags=52%, list=17%, signal=63%
CYTOSOLIC TRNA AMINOACYLATION%REACTOME%R-HSA-379716.1	CYTOSOLIC TRNA AMINOACYLATION%REACTOME%R-HSA-379716.1		23	-0.725242	-2.16864	0	0.000218231	0.009	4071	tags=78%, list=25%, signal=105%
M G1 TRANSITION%REACTOME DATABASE ID RELEASE 57%68874	M G1 TRANSITION%REACTOME DATABASE ID RELEASE 57%68874		71	-0.560205	-2.16813	0	0.000214035	0.009	3863	tags=54%, list=24%, signal=70%
SCF(SKP2)-MEDIATED DEGRADATION OF P27 P21%REACTOME DATABASE ID RELEASE 57%187577	SCF(SKP2)-MEDIATED DEGRADATION OF P27 P21%REACTOME DATABASE ID RELEASE 57%187577		47	-0.604669	-2.16452	0	0.000209996	0.009	2865	tags=57%, list=18%, signal=70%
DNA REPLICATION PRE-INITIATION%REACTOME DATABASE ID RELEASE 57%69002	DNA REPLICATION PRE-INITIATION%REACTOME DATABASE ID RELEASE 57%69002		71	-0.560205	-2.15975	0	0.000228847	0.01	3863	tags=54%, list=24%, signal=70%
BIOCARTA_PROTEASOME_PATHWAY%MSIGDB_C2%BIOCARTA_PROTEASOME_PATHWAY	BIOCARTA_PROTEASOME_PATHWAY%MSIGDB_C2%BIOCARTA_PROTEASOME_PATHWAY		25	-0.699231	-2.14558	0	0.000269943	0.012	2512	tags=56%, list=16%, signal=66%
G1 S TRANSITION%REACTOME DATABASE ID RELEASE 57%69206	G1 S TRANSITION%REACTOME DATABASE ID RELEASE 57%69206		96	-0.514393	-2.13645	0	0.000286941	0.013	3863	tags=55%, list=24%, signal=72%
TRANSCRIPTION-COUPLED NUCLEOTIDE EXCISION REPAIR (TC-NER)%REACTOME DATABASE ID RELEASE 57%6781827	TRANSCRIPTION-COUPLED NUCLEOTIDE EXCISION REPAIR (TC-NER)%REACTOME DATABASE ID RELEASE 57%6781827		66	-0.560075	-2.12825	0	0.000346067	0.016	3829	tags=59%, list=24%, signal=77%
DECTIN-1 MEDIATED NONCANONICAL NF-KB SIGNALING%REACTOME DATABASE ID RELEASE 57%5607761	DECTIN-1 MEDIATED NONCANONICAL NF-KB SIGNALING%REACTOME DATABASE ID RELEASE 57%5607761		47	-0.604353	-2.12199	0	0.000361558	0.017	2702	tags=51%, list=17%, signal=61%
STABILIZATION OF P53%REACTOME%R-HSA-69541.3	STABILIZATION OF P53%REACTOME%R-HSA-69541.3		42	-0.615989	-2.11361	0	0.000396849	0.019	2702	tags=50%, list=17%, signal=60%
UBIQUITIN MEDIATED DEGRADATION OF PHOSPHORYLATED CDC25A%REACTOME DATABASE ID RELEASE 57%69601	UBIQUITIN MEDIATED DEGRADATION OF PHOSPHORYLATED CDC25A%REACTOME DATABASE ID RELEASE 57%69601		40	-0.611102	-2.1116	0	0.000390235	0.019	2702	tags=50%, list=17%, signal=60%
RNA POLYMERASE II TRANSCRIPTION%REACTOME DATABASE ID RELEASE 57%73857	RNA POLYMERASE II TRANSCRIPTION%REACTOME DATABASE ID RELEASE 57%73857		108	-0.508068	-2.10993	0	0.000383837	0.019	3734	tags=59%, list=23%, signal=77%
DEGRADATION OF AXIN%REACTOME DATABASE ID RELEASE 57%4641257	DEGRADATION OF AXIN%REACTOME DATABASE ID RELEASE 57%4641257		42	-0.601037	-2.10553	0	0.000397419	0.02	2702	tags=48%, list=17%, signal=57%
ASSEMBLY OF THE PRE-REPLICATIVE COMPLEX%REACTOME%R-HSA-68867.1	ASSEMBLY OF THE PRE-REPLICATIVE COMPLEX%REACTOME%R-HSA-68867.1		55	-0.578182	-2.10494	0	0.000391111	0.02	2801	tags=47%, list=17%, signal=57%
FORMATION OF HIV ELONGATION COMPLEX IN THE ABSENCE OF HIV TAT%REACTOME%R-HSA-167152.1	FORMATION OF HIV ELONGATION COMPLEX IN THE ABSENCE OF HIV TAT%REACTOME%R-HSA-167152.1		41	-0.611872	-2.10096	0	0.000423322	0.022	3734	tags=63%, list=23%, signal=82%
FORMATION OF RNA POL II ELONGATION COMPLEX%REACTOME DATABASE ID RELEASE 57%112382	FORMATION OF RNA POL II ELONGATION COMPLEX%REACTOME DATABASE ID RELEASE 57%112382		47	-0.583087	-2.0956	0	0.000435956	0.023	3734	tags=60%, list=23%, signal=77%
THE ROLE OF GTSE1 IN G2 M PROGRESSION AFTER G2 CHECKPOINT%REACTOME%R-HSA-8852276.1	THE ROLE OF GTSE1 IN G2 M PROGRESSION AFTER G2 CHECKPOINT%REACTOME%R-HSA-8852276.1		46	-0.591514	-2.09537	0	0.000429351	0.023	2702	tags=48%, list=17%, signal=57%
CROSS-PRESENTATION OF SOLUBLE EXOGENOUS ANTIGENS (ENDOSOMES)%REACTOME DATABASE ID RELEASE 57%1236978	CROSS-PRESENTATION OF SOLUBLE EXOGENOUS ANTIGENS (ENDOSOMES)%REACTOME DATABASE ID RELEASE 57%1236978		39	-0.614894	-2.09156	0	0.000441362	0.024	2702	tags=51%, list=17%, signal=62%
FORMATION OF HIV-1 ELONGATION COMPLEX CONTAINING HIV-1 TAT%REACTOME DATABASE ID RELEASE 57%167200	FORMATION OF HIV-1 ELONGATION COMPLEX CONTAINING HIV-1 TAT%REACTOME DATABASE ID RELEASE 57%167200		39	-0.606147	-2.09102	0	0.000434871	0.024	3734	tags=62%, list=23%, signal=80%
RNA POLYMERASE II PRE-TRANSCRIPTION EVENTS%REACTOME DATABASE ID RELEASE 57%674695	RNA POLYMERASE II PRE-TRANSCRIPTION EVENTS%REACTOME DATABASE ID RELEASE 57%674695		61	-0.562857	-2.09064	0	0.000428569	0.024	3734	tags=59%, list=23%, signal=77%
LATE PHASE OF HIV LIFE CYCLE%REACTOME%R-HSA-162599.1	LATE PHASE OF HIV LIFE CYCLE%REACTOME%R-HSA-162599.1		100	-0.514461	-2.09007	0	0.000422446	0.024	3734	tags=51%, list=23%, signal=66%
REGULATION OF ORNITHINE DECARBOXYLASE (ODC)%REACTOME DATABASE ID RELEASE 57%350562	REGULATION OF ORNITHINE DECARBOXYLASE (ODC)%REACTOME DATABASE ID RELEASE 57%350562		42	-0.588655	-2.08391	0	0.000468691	0.027	2702	tags=50%, list=17%, signal=60%
FORMATION OF THE EARLY ELONGATION COMPLEX%REACTOME DATABASE ID RELEASE 57%113418	FORMATION OF THE EARLY ELONGATION COMPLEX%REACTOME DATABASE ID RELEASE 57%113418		31	-0.627344	-2.08247	0	0.000479096	0.028	3734	tags=65%, list=23%, signal=84%
COMPLEX I BIOGENESIS%REACTOME DATABASE ID RELEASE 57%6799198	COMPLEX I BIOGENESIS%REACTOME DATABASE ID RELEASE 57%6799198		41	-0.595993	-2.08154	0	0.000472533	0.028	3048	tags=56%, list=19%, signal=69%
P53-INDEPENDENT DNA DAMAGE RESPONSE%REACTOME%R-HSA-69610.1	P53-INDEPENDENT DNA DAMAGE RESPONSE%REACTOME%R-HSA-69610.1		40	-0.611102	-2.07856	0	0.000482155	0.028	2702	tags=50%, list=17%, signal=60%
HOST INTERACTIONS OF HIV FACTORS%REACTOME%R-HSA-162909.1	HOST INTERACTIONS OF HIV FACTORS%REACTOME%R-HSA-162909.1		98	-0.517795	-2.07753	0	0.000491496	0.028	2302	tags=36%, list=14%, signal=41%
HH MUTANTS THAT DON'T UNDERGO AUTOCATALYTIC PROCESSING ARE DEGRADED BY ERAD%REACTOME DATABASE ID RELEASE 57%5362768	HH MUTANTS THAT DON'T UNDERGO AUTOCATALYTIC PROCESSING ARE DEGRADED BY ERAD%REACTOME DATABASE ID RELEASE 57%5362768		43	-0.585272	-2.07291	0	0.000517079	0.03	2702	tags=47%, list=17%, signal=56%
HIV ELONGATION ARREST AND RECOVERY%REACTOME%R-HSA-167287.1	HIV ELONGATION ARREST AND RECOVERY%REACTOME%R-HSA-167287.1		30	-0.623694	-2.07132	0	0.00054104	0.032	3734	tags=63%, list=23%, signal=82%
HALLMARK_MYC_TARGETS_V2%MSIGDB_C2%HALLMARK_MYC_TARGETS_V2	HALLMARK_MYC_TARGETS_V2%MSIGDB_C2%HALLMARK_MYC_TARGETS_V2		53	-0.559518	-2.06649	0	0.000613107	0.037	3086	tags=53%, list=19%, signal=65%
HH MUTANTS ABROGATE LIGAND SECRETION%REACTOME DATABASE ID RELEASE 57%5387390	HH MUTANTS ABROGATE LIGAND SECRETION%REACTOME DATABASE ID RELEASE 57%5387390		45	-0.57696	-2.06162	0	0.000728458	0.045	2702	tags=44%, list=17%, signal=53%
TAT-MEDIATED ELONGATION OF THE HIV-1 TRANSCRIPT%REACTOME%R-HSA-167246.1	TAT-MEDIATED ELONGATION OF THE HIV-1 TRANSCRIPT%REACTOME%R-HSA-167246.1		39	-0.606147	-2.0553	0	0.000826491	0.052	3734	tags=62%, list=23%, signal=80%
HIV TRANSCRIPTION ELONGATION%REACTOME%R-HSA-167169.1	HIV TRANSCRIPTION ELONGATION%REACTOME%R-HSA-167169.1		39	-0.606147	-2.05509	0	0.000816287	0.052	3734	tags=62%, list=23%, signal=80%
PROCESSING OF CAPPED INTRON-CONTAINING PRE-MRNA%REACTOME DATABASE ID RELEASE 57%72203	PROCESSING OF CAPPED INTRON-CONTAINING PRE-MRNA%REACTOME DATABASE ID RELEASE 57%72203		194	-0.456236	-2.05289	0	0.000851392	0.055	3734	tags=46%, list=23%, signal=59%
CONVERSION FROM APC C:CDC20 TO APC C:CDH1 IN LATE ANAPHASE%REACTOME%R-HSA-176407.1	CONVERSION FROM APC C:CDC20 TO APC C:CDH1 IN LATE ANAPHASE%REACTOME%R-HSA-176407.1		18	-0.709296	-2.05273	0	0.000841135	0.055	2334	tags=50%, list=15%, signal=58%
RNA POLYMERASE I PROMOTER ESCAPE%REACTOME%R-HSA-73772.1	RNA POLYMERASE I PROMOTER ESCAPE%REACTOME%R-HSA-73772.1		26	-0.662369	-2.05247	0	0.000831121	0.055	1612	tags=38%, list=10%, signal=43%
APC C:CDC20 MEDIATED DEGRADATION OF CYCLIN B%REACTOME DATABASE ID RELEASE 57%174048	APC C:CDC20 MEDIATED DEGRADATION OF CYCLIN B%REACTOME DATABASE ID RELEASE 57%174048		17	-0.709424	-2.04664	0	0.000892699	0.059	2334	tags=53%, list=15%, signal=62%
P53-INDEPENDENT G1 S DNA DAMAGE CHECKPOINT%REACTOME%R-HSA-69613.1	P53-INDEPENDENT G1 S DNA DAMAGE CHECKPOINT%REACTOME%R-HSA-69613.1		40	-0.611102	-2.04147	0	0.00105315	0.069	2702	tags=50%, list=17%, signal=60%
INHIBITION OF THE PROTEOLYTIC ACTIVITY OF APC C REQUIRED FOR THE ONSET OF ANAPHASE BY MITOTIC SPINDLE CHECKPOINT COMPONENTS%REACTOME DATABASE ID RELEASE 57%141405	INHIBITION OF THE PROTEOLYTIC ACTIVITY OF APC C REQUIRED FOR THE ONSET OF ANAPHASE BY MITOTIC SPINDLE CHECKPOINT COMPONENTS%REACTOME DATABASE ID RELEASE 57%141405		19	-0.688557	-2.04062	0	0.00104105	0.069	2716	tags=53%, list=17%, signal=63%
HEDGEHOG LIGAND BIOGENESIS%REACTOME%R-HSA-5358346.1	HEDGEHOG LIGAND BIOGENESIS%REACTOME%R-HSA-5358346.1		51	-0.56654	-2.03855	0	0.00105706	0.07	2702	tags=43%, list=17%, signal=52%
RNA POLYMERASE II TRANSCRIPTION ELONGATION%REACTOME%R-HSA-75955.1	RNA POLYMERASE II TRANSCRIPTION ELONGATION%REACTOME%R-HSA-75955.1		47	-0.583087	-2.03718	0	0.00108666	0.073	3734	tags=60%, list=23%, signal=77%
FORMATION OF THE HIV-1 EARLY ELONGATION COMPLEX%REACTOME%R-HSA-167158.1	FORMATION OF THE HIV-1 EARLY ELONGATION COMPLEX%REACTOME%R-HSA-167158.1		31	-0.627344	-2.03073	0	0.00115524	0.076	3734	tags=65%, list=23%, signal=84%
M PHASE%REACTOME%R-HSA-68886.1	M PHASE%REACTOME%R-HSA-68886.1		210	-0.444786	-2.0287	0	0.00115588	0.077	2922	tags=32%, list=18%, signal=39%
NUCLEOTIDE EXCISION REPAIR%REACTOME DATABASE ID RELEASE 57%5696398	NUCLEOTIDE EXCISION REPAIR%REACTOME DATABASE ID RELEASE 57%5696398		93	-0.501636	-2.02652	0	0.00115625	0.078	3829	tags=52%, list=24%, signal=67%
CYCLIN A:CDK2-ASSOCIATED EVENTS AT S PHASE ENTRY%REACTOME DATABASE ID RELEASE 57%69656	CYCLIN A:CDK2-ASSOCIATED EVENTS AT S PHASE ENTRY%REACTOME DATABASE ID RELEASE 57%69656		57	-0.546603	-2.02633	0	0.00114382	0.078	2865	tags=51%, list=18%, signal=62%
MITOTIC SPINDLE CHECKPOINT%REACTOME DATABASE ID RELEASE 57%69618	MITOTIC SPINDLE CHECKPOINT%REACTOME DATABASE ID RELEASE 57%69618		20	-0.703404	-2.02362	0	0.00118273	0.082	2716	tags=55%, list=17%, signal=66%
FORMATION OF TC-NER PRE-INCISION COMPLEX%REACTOME DATABASE ID RELEASE 57%6781823	FORMATION OF TC-NER PRE-INCISION COMPLEX%REACTOME DATABASE ID RELEASE 57%6781823		44	-0.572909	-2.0223	0	0.00117028	0.082	3829	tags=61%, list=24%, signal=80%
RNA POLYMERASE I TRANSCRIPTION INITIATION%REACTOME%R-HSA-73762.1	RNA POLYMERASE I TRANSCRIPTION INITIATION%REACTOME%R-HSA-73762.1		42	-0.587818	-2.0222	0	0.00117092	0.083	3583	tags=48%, list=22%, signal=61%
P53-DEPENDENT G1 DNA DAMAGE RESPONSE%REACTOME%R-HSA-69563.2	P53-DEPENDENT G1 DNA DAMAGE RESPONSE%REACTOME%R-HSA-69563.2		51	-0.553888	-2.01997	0	0.00121079	0.085	2865	tags=49%, list=18%, signal=59%
ORC1 REMOVAL FROM CHROMATIN%REACTOME%R-HSA-68949.1	ORC1 REMOVAL FROM CHROMATIN%REACTOME%R-HSA-68949.1		58	-0.533778	-2.01327	0	0.00126131	0.09	2865	tags=47%, list=18%, signal=56%
RNA POLYMERASE II TRANSCRIBES SNRNA GENES%REACTOME DATABASE ID RELEASE 57%6807505	RNA POLYMERASE II TRANSCRIBES SNRNA GENES%REACTOME DATABASE ID RELEASE 57%6807505		66	-0.522792	-2.00883	0	0.00137227	0.1	3734	tags=56%, list=23%, signal=73%
DEGRADATION OF BETA-CATENIN BY THE DESTRUCTION COMPLEX%REACTOME DATABASE ID RELEASE 57%195253	DEGRADATION OF BETA-CATENIN BY THE DESTRUCTION COMPLEX%REACTOME DATABASE ID RELEASE 57%195253		67	-0.526407	-2.00763	0.00299401	0.00143273	0.105	2702	tags=43%, list=17%, signal=52%
CYCLIN E ASSOCIATED EVENTS DURING G1 S TRANSITION%REACTOME DATABASE ID RELEASE 57%69202	CYCLIN E ASSOCIATED EVENTS DURING G1 S TRANSITION%REACTOME DATABASE ID RELEASE 57%69202		56	-0.540718	-2.0074	0	0.00141855	0.105	2865	tags=52%, list=18%, signal=63%
G1 S DNA DAMAGE CHECKPOINTS%REACTOME DATABASE ID RELEASE 57%69615	G1 S DNA DAMAGE CHECKPOINTS%REACTOME DATABASE ID RELEASE 57%69615		53	-0.543221	-2.00517	0	0.00146408	0.11	2865	tags=47%, list=18%, signal=57%
PAUSING AND RECOVERY OF HIV ELONGATION%REACTOME DATABASE ID RELEASE 57%167290	PAUSING AND RECOVERY OF HIV ELONGATION%REACTOME DATABASE ID RELEASE 57%167290		30	-0.623694	-2.00007	0	0.00150884	0.115	3734	tags=63%, list=23%, signal=82%
DEGRADATION OF DVL%REACTOME%R-HSA-4641258.2	DEGRADATION OF DVL%REACTOME%R-HSA-4641258.2		44	-0.561673	-1.99952	0	0.00149433	0.115	2702	tags=48%, list=17%, signal=57%
SWITCHING OF ORIGINS TO A POST-REPLICATIVE STATE%REACTOME%R-HSA-69052.1	SWITCHING OF ORIGINS TO A POST-REPLICATIVE STATE%REACTOME%R-HSA-69052.1		58	-0.533778	-1.99237	0	0.00157436	0.121	2865	tags=47%, list=18%, signal=56%
DEFECTIVE CFTR CAUSES CYSTIC FIBROSIS%REACTOME%R-HSA-5678895.2	DEFECTIVE CFTR CAUSES CYSTIC FIBROSIS%REACTOME%R-HSA-5678895.2		48	-0.54726	-1.99236	0	0.00155951	0.121	2702	tags=46%, list=17%, signal=55%
INACTIVATION OF APC C VIA DIRECT INHIBITION OF THE APC C COMPLEX%REACTOME DATABASE ID RELEASE 57%141430	INACTIVATION OF APC C VIA DIRECT INHIBITION OF THE APC C COMPLEX%REACTOME DATABASE ID RELEASE 57%141430		19	-0.688557	-1.98714	0	0.00163515	0.129	2716	tags=53%, list=17%, signal=63%
P53-DEPENDENT G1 S DNA DAMAGE CHECKPOINT%REACTOME DATABASE ID RELEASE 57%69580	P53-DEPENDENT G1 S DNA DAMAGE CHECKPOINT%REACTOME DATABASE ID RELEASE 57%69580		51	-0.553888	-1.98439	0	0.00167792	0.134	2865	tags=49%, list=18%, signal=59%
S PHASE%REACTOME DATABASE ID RELEASE 57%69242	S PHASE%REACTOME DATABASE ID RELEASE 57%69242		111	-0.473915	-1.97861	0	0.00176503	0.14	3863	tags=50%, list=24%, signal=66%
RNA POLYMERASE I, RNA POLYMERASE III, AND MITOCHONDRIAL TRANSCRIPTION%REACTOME%R-HSA-504046.2	RNA POLYMERASE I, RNA POLYMERASE III, AND MITOCHONDRIAL TRANSCRIPTION%REACTOME%R-HSA-504046.2		88	-0.495817	-1.97838	0	0.00174899	0.14	3583	tags=43%, list=22%, signal=55%
RNA POLYMERASE I PROMOTER CLEARANCE%REACTOME DATABASE ID RELEASE 57%73854	RNA POLYMERASE I PROMOTER CLEARANCE%REACTOME DATABASE ID RELEASE 57%73854		54	-0.53513	-1.97589	0	0.0018345	0.148	3583	tags=43%, list=22%, signal=55%
ELONGATION ARREST AND RECOVERY%REACTOME%R-HSA-112387.1	ELONGATION ARREST AND RECOVERY%REACTOME%R-HSA-112387.1		36	-0.580506	-1.97318	0	0.00189388	0.155	3734	tags=58%, list=23%, signal=76%
REMOVAL OF LICENSING FACTORS FROM ORIGINS%REACTOME DATABASE ID RELEASE 57%69300	REMOVAL OF LICENSING FACTORS FROM ORIGINS%REACTOME DATABASE ID RELEASE 57%69300		60	-0.529881	-1.96991	0.00280899	0.0019315	0.159	2865	tags=45%, list=18%, signal=55%
RNA POLYMERASE I TRANSCRIPTION TERMINATION%REACTOME DATABASE ID RELEASE 57%73863	RNA POLYMERASE I TRANSCRIPTION TERMINATION%REACTOME DATABASE ID RELEASE 57%73863		27	-0.624142	-1.96871	0	0.00193599	0.16	1612	tags=33%, list=10%, signal=37%
RNA POLYMERASE II PROMOTER ESCAPE%REACTOME DATABASE ID RELEASE 57%73776	RNA POLYMERASE II PROMOTER ESCAPE%REACTOME DATABASE ID RELEASE 57%73776		36	-0.575727	-1.96577	0	0.00200372	0.162	3734	tags=61%, list=23%, signal=79%
RNA POL II CTD PHOSPHORYLATION AND INTERACTION WITH CE%REACTOME%R-HSA-167160.1	RNA POL II CTD PHOSPHORYLATION AND INTERACTION WITH CE%REACTOME%R-HSA-167160.1		25	-0.63039	-1.96524	0.00289017	0.00199669	0.163	3734	tags=68%, list=23%, signal=89%
DNA REPLICATION%REACTOME%R-HSA-69306.1	DNA REPLICATION%REACTOME%R-HSA-69306.1		92	-0.478146	-1.9634	0	0.00207654	0.172	3622	tags=48%, list=23%, signal=61%
GAP-FILLING DNA REPAIR SYNTHESIS AND LIGATION IN TC-NER%REACTOME%R-HSA-6782210.1	GAP-FILLING DNA REPAIR SYNTHESIS AND LIGATION IN TC-NER%REACTOME%R-HSA-6782210.1		54	-0.543566	-1.96298	0	0.00205895	0.172	3829	tags=56%, list=24%, signal=73%
DUAL INCISION IN TC-NER%REACTOME DATABASE ID RELEASE 57%6782135	DUAL INCISION IN TC-NER%REACTOME DATABASE ID RELEASE 57%6782135		54	-0.53042	-1.95926	0	0.00208575	0.176	3829	tags=56%, list=24%, signal=73%
ABORTIVE ELONGATION OF HIV-1 TRANSCRIPT IN THE ABSENCE OF TAT%REACTOME%R-HSA-167242.1	ABORTIVE ELONGATION OF HIV-1 TRANSCRIPT IN THE ABSENCE OF TAT%REACTOME%R-HSA-167242.1		22	-0.646476	-1.95809	0	0.00207821	0.176	3734	tags=64%, list=23%, signal=83%
RNA POLYMERASE III TRANSCRIPTION INITIATION FROM TYPE 3 PROMOTER%REACTOME%R-HSA-76071.1	RNA POLYMERASE III TRANSCRIPTION INITIATION FROM TYPE 3 PROMOTER%REACTOME%R-HSA-76071.1		26	-0.623696	-1.95754	0	0.00209095	0.178	3583	tags=65%, list=22%, signal=84%
SYNTHESIS OF DNA%REACTOME%R-HSA-69239.1	SYNTHESIS OF DNA%REACTOME%R-HSA-69239.1		85	-0.49516	-1.9554	0	0.00212343	0.183	3611	tags=51%, list=23%, signal=65%
ER-PHAGOSOME PATHWAY%REACTOME%R-HSA-1236974.2	ER-PHAGOSOME PATHWAY%REACTOME%R-HSA-1236974.2		62	-0.515065	-1.95354	0	0.00217552	0.189	2702	tags=45%, list=17%, signal=54%
CLEC7A (DECTIN-1) SIGNALING%REACTOME%R-HSA-5607764.1	CLEC7A (DECTIN-1) SIGNALING%REACTOME%R-HSA-5607764.1		80	-0.49042	-1.95279	0	0.00217819	0.191	2702	tags=43%, list=17%, signal=51%
UCH PROTEINASES%REACTOME DATABASE ID RELEASE 57%5689603	UCH PROTEINASES%REACTOME DATABASE ID RELEASE 57%5689603		68	-0.511363	-1.95257	0	0.00217076	0.192	2863	tags=46%, list=18%, signal=55%
TAT-MEDIATED HIV ELONGATION ARREST AND RECOVERY%REACTOME%R-HSA-167243.1	TAT-MEDIATED HIV ELONGATION ARREST AND RECOVERY%REACTOME%R-HSA-167243.1		28	-0.615605	-1.95079	0.0025	0.0021732	0.194	3734	tags=61%, list=23%, signal=79%
PHOSPHORYLATION OF THE APC C%REACTOME DATABASE ID RELEASE 57%176412	PHOSPHORYLATION OF THE APC C%REACTOME DATABASE ID RELEASE 57%176412		17	-0.688787	-1.94871	0	0.00223277	0.2	2334	tags=53%, list=15%, signal=62%
ABC TRANSPORTER DISORDERS%REACTOME DATABASE ID RELEASE 57%5619084	ABC TRANSPORTER DISORDERS%REACTOME DATABASE ID RELEASE 57%5619084		53	-0.53284	-1.94852	0	0.00222544	0.201	2702	tags=42%, list=17%, signal=50%
REGULATION OF DNA REPLICATION%REACTOME DATABASE ID RELEASE 57%69304	REGULATION OF DNA REPLICATION%REACTOME DATABASE ID RELEASE 57%69304		63	-0.509517	-1.948	0	0.00220819	0.201	2865	tags=43%, list=18%, signal=52%
PRE-MRNA SPLICING%REACTOME%R-HSA-72163.1	PRE-MRNA SPLICING%REACTOME%R-HSA-72163.1		151	-0.443371	-1.94585	0	0.00225784	0.208	3734	tags=49%, list=23%, signal=63%
MRNA CAPPING%REACTOME%R-HSA-72086.1	MRNA CAPPING%REACTOME%R-HSA-72086.1		27	-0.624255	-1.94464	0	0.00228683	0.213	3734	tags=67%, list=23%, signal=87%
PAUSING AND RECOVERY OF TAT-MEDIATED HIV ELONGATION%REACTOME DATABASE ID RELEASE 57%167238	PAUSING AND RECOVERY OF TAT-MEDIATED HIV ELONGATION%REACTOME DATABASE ID RELEASE 57%167238		28	-0.615605	-1.94247	0	0.00232593	0.219	3734	tags=61%, list=23%, signal=79%
RNA POLYMERASE II TRANSCRIPTION PRE-INITIATION AND PROMOTER OPENING%REACTOME%R-HSA-73779.1	RNA POLYMERASE II TRANSCRIPTION PRE-INITIATION AND PROMOTER OPENING%REACTOME%R-HSA-73779.1		36	-0.575727	-1.94215	0	0.00230844	0.219	3734	tags=61%, list=23%, signal=79%
RNA POL II CTD PHOSPHORYLATION AND INTERACTION WITH CE%REACTOME%R-HSA-77075.1	RNA POL II CTD PHOSPHORYLATION AND INTERACTION WITH CE%REACTOME%R-HSA-77075.1		25	-0.63039	-1.94124	0	0.00229122	0.219	3734	tags=68%, list=23%, signal=89%
RNA POLYMERASE II TRANSCRIPTION INITIATION%REACTOME DATABASE ID RELEASE 57%75953	RNA POLYMERASE II TRANSCRIPTION INITIATION%REACTOME DATABASE ID RELEASE 57%75953		36	-0.575727	-1.94088	0	0.00231029	0.221	3734	tags=61%, list=23%, signal=79%
CELL CYCLE CHECKPOINTS%REACTOME DATABASE ID RELEASE 57%69620	CELL CYCLE CHECKPOINTS%REACTOME DATABASE ID RELEASE 57%69620		147	-0.449994	-1.93968	0	0.00232865	0.224	2882	tags=37%, list=18%, signal=44%
DEADENYLATION-DEPENDENT MRNA DECAY%REACTOME%R-HSA-429914.2	DEADENYLATION-DEPENDENT MRNA DECAY%REACTOME%R-HSA-429914.2		47	-0.546661	-1.93855	0	0.00232973	0.226	3038	tags=43%, list=19%, signal=52%
TRNA PROCESSING IN THE NUCLEUS%REACTOME DATABASE ID RELEASE 57%6784531	TRNA PROCESSING IN THE NUCLEUS%REACTOME DATABASE ID RELEASE 57%6784531		48	-0.549376	-1.93584	0	0.00237478	0.231	3075	tags=40%, list=19%, signal=49%
HIV TRANSCRIPTION INITIATION%REACTOME DATABASE ID RELEASE 57%167161	HIV TRANSCRIPTION INITIATION%REACTOME DATABASE ID RELEASE 57%167161		36	-0.575727	-1.93389	0	0.0024009	0.235	3734	tags=61%, list=23%, signal=79%
RNA POLYMERASE II TRANSCRIPTION INITIATION AND PROMOTER CLEARANCE%REACTOME%R-HSA-76042.1	RNA POLYMERASE II TRANSCRIPTION INITIATION AND PROMOTER CLEARANCE%REACTOME%R-HSA-76042.1		36	-0.575727	-1.92727	0	0.00251627	0.246	3734	tags=61%, list=23%, signal=79%
ABC-FAMILY PROTEINS MEDIATED TRANSPORT%REACTOME DATABASE ID RELEASE 57%382556	ABC-FAMILY PROTEINS MEDIATED TRANSPORT%REACTOME DATABASE ID RELEASE 57%382556		86	-0.474556	-1.92581	0	0.00254975	0.249	2068	tags=35%, list=13%, signal=40%
AUF1 (HNRNP D0) BINDS AND DESTABILIZES MRNA%REACTOME DATABASE ID RELEASE 57%450408	AUF1 (HNRNP D0) BINDS AND DESTABILIZES MRNA%REACTOME DATABASE ID RELEASE 57%450408		40	-0.551991	-1.92528	0	0.00254893	0.251	2702	tags=50%, list=17%, signal=60%
DOWNSTREAM TCR SIGNALING%REACTOME DATABASE ID RELEASE 57%202424	DOWNSTREAM TCR SIGNALING%REACTOME DATABASE ID RELEASE 57%202424		69	-0.500891	-1.92194	0	0.00268707	0.264	2835	tags=45%, list=18%, signal=54%
RNA POLYMERASE II HIV PROMOTER ESCAPE%REACTOME DATABASE ID RELEASE 57%167162	RNA POLYMERASE II HIV PROMOTER ESCAPE%REACTOME DATABASE ID RELEASE 57%167162		36	-0.575727	-1.92066	0.0025641	0.00270206	0.268	3734	tags=61%, list=23%, signal=79%
MITOTIC G1-G1 S PHASES%REACTOME DATABASE ID RELEASE 57%453279	MITOTIC G1-G1 S PHASES%REACTOME DATABASE ID RELEASE 57%453279		117	-0.461117	-1.92007	0	0.00270059	0.27	3137	tags=40%, list=20%, signal=50%
RNA POLYMERASE I TRANSCRIPTION%REACTOME%R-HSA-73864.1	RNA POLYMERASE I TRANSCRIPTION%REACTOME%R-HSA-73864.1		56	-0.516844	-1.91501	0	0.00280749	0.282	3583	tags=41%, list=22%, signal=53%
GLOBAL GENOME NUCLEOTIDE EXCISION REPAIR (GG-NER)%REACTOME DATABASE ID RELEASE 57%5696399	GLOBAL GENOME NUCLEOTIDE EXCISION REPAIR (GG-NER)%REACTOME DATABASE ID RELEASE 57%5696399		70	-0.492372	-1.90384	0	0.00323845	0.321	3611	tags=50%, list=23%, signal=64%
MRNA SPLICING%REACTOME DATABASE ID RELEASE 57%72172	MRNA SPLICING%REACTOME DATABASE ID RELEASE 57%72172		157	-0.436212	-1.90065	0	0.00342443	0.339	3734	tags=48%, list=23%, signal=62%
CELL CYCLE, MITOTIC%REACTOME DATABASE ID RELEASE 57%69278	CELL CYCLE, MITOTIC%REACTOME DATABASE ID RELEASE 57%69278		386	-0.388318	-1.89225	0	0.00380718	0.374	3145	tags=33%, list=20%, signal=40%
HIV LIFE CYCLE%REACTOME%R-HSA-162587.1	HIV LIFE CYCLE%REACTOME%R-HSA-162587.1		111	-0.453551	-1.89108	0	0.00383132	0.379	3734	tags=49%, list=23%, signal=63%
RNA POLYMERASE I CHAIN ELONGATION%REACTOME%R-HSA-73777.1	RNA POLYMERASE I CHAIN ELONGATION%REACTOME%R-HSA-73777.1		36	-0.567244	-1.88954	0	0.0038706	0.383	1612	tags=31%, list=10%, signal=34%
B-WICH COMPLEX POSITIVELY REGULATES RRNA EXPRESSION%REACTOME DATABASE ID RELEASE 57%5250924	B-WICH COMPLEX POSITIVELY REGULATES RRNA EXPRESSION%REACTOME DATABASE ID RELEASE 57%5250924		38	-0.542873	-1.87799	0.00503778	0.00447116	0.425	1280	tags=24%, list=8%, signal=26%
TRNA AMINOACYLATION%REACTOME DATABASE ID RELEASE 57%379724	TRNA AMINOACYLATION%REACTOME DATABASE ID RELEASE 57%379724		40	-0.54466	-1.87106	0	0.00494051	0.457	4071	tags=63%, list=25%, signal=84%
HALLMARK_DNA_REPAIR%MSIGDB_C2%HALLMARK_DNA_REPAIR	HALLMARK_DNA_REPAIR%MSIGDB_C2%HALLMARK_DNA_REPAIR		136	-0.428789	-1.86381	0	0.00541115	0.482	3627	tags=47%, list=23%, signal=60%
INFECTIOUS DISEASE%REACTOME%R-HSA-5663205.1	INFECTIOUS DISEASE%REACTOME%R-HSA-5663205.1		242	-0.403288	-1.85984	0	0.00567853	0.502	3768	tags=45%, list=24%, signal=58%
PURINE METABOLISM%REACTOME DATABASE ID RELEASE 57%73847	PURINE METABOLISM%REACTOME DATABASE ID RELEASE 57%73847		31	-0.580889	-1.85965	0	0.00565747	0.502	1768	tags=35%, list=11%, signal=40%
RMTS METHYLATE HISTONE ARGININES%REACTOME%R-HSA-3214858.1	RMTS METHYLATE HISTONE ARGININES%REACTOME%R-HSA-3214858.1		33	-0.554636	-1.85828	0	0.00571582	0.507	4359	tags=61%, list=27%, signal=83%
HALLMARK_MTORC1_SIGNALING%MSIGDB_C2%HALLMARK_MTORC1_SIGNALING	HALLMARK_MTORC1_SIGNALING%MSIGDB_C2%HALLMARK_MTORC1_SIGNALING		179	-0.420268	-1.85414	0	0.00598249	0.528	2863	tags=38%, list=18%, signal=46%
FCERI MEDIATED NF-KB ACTIVATION%REACTOME DATABASE ID RELEASE 57%2871837	FCERI MEDIATED NF-KB ACTIVATION%REACTOME DATABASE ID RELEASE 57%2871837		63	-0.486126	-1.85054	0	0.00626268	0.549	2702	tags=46%, list=17%, signal=55%
DISORDERS OF TRANSMEMBRANE TRANSPORTERS%REACTOME DATABASE ID RELEASE 57%5619115	DISORDERS OF TRANSMEMBRANE TRANSPORTERS%REACTOME DATABASE ID RELEASE 57%5619115		60	-0.489387	-1.84673	0	0.00656051	0.572	2702	tags=37%, list=17%, signal=44%
APC-CDC20 MEDIATED DEGRADATION OF NEK2A%REACTOME DATABASE ID RELEASE 57%179409	APC-CDC20 MEDIATED DEGRADATION OF NEK2A%REACTOME DATABASE ID RELEASE 57%179409		20	-0.630295	-1.83983	0.00255102	0.00717713	0.608	2716	tags=50%, list=17%, signal=60%
POSITIVE EPIGENETIC REGULATION OF RRNA EXPRESSION%REACTOME DATABASE ID RELEASE 57%5250913	POSITIVE EPIGENETIC REGULATION OF RRNA EXPRESSION%REACTOME DATABASE ID RELEASE 57%5250913		52	-0.500238	-1.83738	0	0.00722423	0.611	3600	tags=38%, list=22%, signal=49%
EUKARYOTIC TRANSLATION INITIATION%REACTOME%R-HSA-72613.1	EUKARYOTIC TRANSLATION INITIATION%REACTOME%R-HSA-72613.1		59	-0.487306	-1.82346	0	0.00851733	0.68	4114	tags=56%, list=26%, signal=75%
GENERAL TRANSCRIPTION REGULATION%PANTHER PATHWAY%P00023	GENERAL TRANSCRIPTION REGULATION%PANTHER PATHWAY%P00023		26	-0.589468	-1.81068	0	0.00964615	0.732	2989	tags=46%, list=19%, signal=57%
C-TYPE LECTIN RECEPTORS (CLRS)%REACTOME%R-HSA-5621481.1	C-TYPE LECTIN RECEPTORS (CLRS)%REACTOME%R-HSA-5621481.1		99	-0.438316	-1.80984	0	0.0096924	0.735	2702	tags=38%, list=17%, signal=46%
CAP-DEPENDENT TRANSLATION INITIATION%REACTOME DATABASE ID RELEASE 57%72737	CAP-DEPENDENT TRANSLATION INITIATION%REACTOME DATABASE ID RELEASE 57%72737		59	-0.487306	-1.8092	0	0.00969207	0.738	4114	tags=56%, list=26%, signal=75%
TRNA CHARGING%HUMANCYC%TRNA-CHARGING-PWY	TRNA CHARGING%HUMANCYC%TRNA-CHARGING-PWY		36	-0.531197	-1.80031	0.00505051	0.0103421	0.761	4071	tags=64%, list=25%, signal=85%
TRANSPORT OF MATURE TRANSCRIPT TO CYTOPLASM%REACTOME%R-HSA-72202.1	TRANSPORT OF MATURE TRANSCRIPT TO CYTOPLASM%REACTOME%R-HSA-72202.1		58	-0.47843	-1.79845	0	0.0105207	0.765	2993	tags=40%, list=19%, signal=49%
CHROMOSOME MAINTENANCE%REACTOME DATABASE ID RELEASE 57%73886	CHROMOSOME MAINTENANCE%REACTOME DATABASE ID RELEASE 57%73886		65	-0.461911	-1.7846	0	0.0121745	0.815	3614	tags=48%, list=23%, signal=61%
RESOLUTION OF SISTER CHROMATID COHESION%REACTOME%R-HSA-2500257.1	RESOLUTION OF SISTER CHROMATID COHESION%REACTOME%R-HSA-2500257.1		90	-0.438112	-1.77724	0	0.0129764	0.845	4354	tags=44%, list=27%, signal=61%
ACTIVATION OF THE PRE-REPLICATIVE COMPLEX%REACTOME%R-HSA-68962.1	ACTIVATION OF THE PRE-REPLICATIVE COMPLEX%REACTOME%R-HSA-68962.1		31	-0.546341	-1.77683	0.00247525	0.012943	0.846	4270	tags=58%, list=27%, signal=79%
MITOTIC PROMETAPHASE%REACTOME DATABASE ID RELEASE 57%68877	MITOTIC PROMETAPHASE%REACTOME DATABASE ID RELEASE 57%68877		96	-0.436173	-1.77374	0	0.0132027	0.852	4354	tags=45%, list=27%, signal=61%
RNA POLYMERASE III TRANSCRIPTION%REACTOME DATABASE ID RELEASE 57%74158	RNA POLYMERASE III TRANSCRIPTION%REACTOME DATABASE ID RELEASE 57%74158		37	-0.518703	-1.76692	0.00560224	0.0140657	0.871	2641	tags=43%, list=16%, signal=52%
RNA POLYMERASE III ABORTIVE AND RETRACTIVE INITIATION%REACTOME DATABASE ID RELEASE 57%749476	RNA POLYMERASE III ABORTIVE AND RETRACTIVE INITIATION%REACTOME DATABASE ID RELEASE 57%749476		37	-0.518703	-1.76526	0.00514139	0.0142124	0.879	2641	tags=43%, list=16%, signal=52%
REGULATION OF MRNA STABILITY BY PROTEINS THAT BIND AU-RICH ELEMENTS%REACTOME DATABASE ID RELEASE 57%450531	REGULATION OF MRNA STABILITY BY PROTEINS THAT BIND AU-RICH ELEMENTS%REACTOME DATABASE ID RELEASE 57%450531		68	-0.467435	-1.76321	0	0.014406	0.887	2852	tags=43%, list=18%, signal=52%
RECOGNITION OF DNA DAMAGE BY PCNA-CONTAINING REPLICATION COMPLEX%REACTOME%R-HSA-110314.1	RECOGNITION OF DNA DAMAGE BY PCNA-CONTAINING REPLICATION COMPLEX%REACTOME%R-HSA-110314.1		25	-0.562084	-1.75652	0.00235849	0.0151091	0.899	4197	tags=60%, list=26%, signal=81%
RNA POLYMERASE III TRANSCRIPTION INITIATION%REACTOME%R-HSA-76046.1	RNA POLYMERASE III TRANSCRIPTION INITIATION%REACTOME%R-HSA-76046.1		33	-0.524737	-1.74512	0	0.0166265	0.918	2641	tags=42%, list=16%, signal=51%
CELL CYCLE%REACTOME DATABASE ID RELEASE 57%1640170	CELL CYCLE%REACTOME DATABASE ID RELEASE 57%1640170		475	-0.347686	-1.73531	0	0.0182424	0.933	3145	tags=31%, list=20%, signal=37%
G2 M CHECKPOINTS%REACTOME%R-HSA-69481.2	G2 M CHECKPOINTS%REACTOME%R-HSA-69481.2		116	-0.417152	-1.72925	0	0.0191198	0.942	3863	tags=42%, list=24%, signal=55%
DEADENYLATION OF MRNA%REACTOME DATABASE ID RELEASE 57%429947	DEADENYLATION OF MRNA%REACTOME DATABASE ID RELEASE 57%429947		22	-0.576195	-1.72321	0.0119904	0.0202032	0.949	3309	tags=45%, list=21%, signal=57%
PYRUVATE METABOLISM AND CITRIC ACID (TCA) CYCLE%REACTOME DATABASE ID RELEASE 57%71406	PYRUVATE METABOLISM AND CITRIC ACID (TCA) CYCLE%REACTOME DATABASE ID RELEASE 57%71406		45	-0.473735	-1.72305	0.00269542	0.0201124	0.95	3502	tags=51%, list=22%, signal=65%
EPIGENETIC REGULATION OF GENE EXPRESSION%REACTOME%R-HSA-212165.1	EPIGENETIC REGULATION OF GENE EXPRESSION%REACTOME%R-HSA-212165.1		89	-0.421142	-1.71725	0	0.0210154	0.96	3600	tags=39%, list=22%, signal=50%
ANTIGEN PROCESSING-CROSS PRESENTATION%REACTOME DATABASE ID RELEASE 57%1236975	ANTIGEN PROCESSING-CROSS PRESENTATION%REACTOME DATABASE ID RELEASE 57%1236975		75	-0.451846	-1.71216	0	0.0219239	0.966	2752	tags=41%, list=17%, signal=50%
EXTENSION OF TELOMERES%REACTOME DATABASE ID RELEASE 57%180786	EXTENSION OF TELOMERES%REACTOME DATABASE ID RELEASE 57%180786		27	-0.548971	-1.7081	0.00502513	0.02243	0.97	3611	tags=59%, list=23%, signal=76%
GTP HYDROLYSIS AND JOINING OF THE 60S RIBOSOMAL SUBUNIT%REACTOME%R-HSA-72706.1	GTP HYDROLYSIS AND JOINING OF THE 60S RIBOSOMAL SUBUNIT%REACTOME%R-HSA-72706.1		52	-0.46891	-1.7058	0	0.022821	0.972	4114	tags=56%, list=26%, signal=75%
ACTIVATION OF ATR IN RESPONSE TO REPLICATION STRESS%REACTOME DATABASE ID RELEASE 57%176187	ACTIVATION OF ATR IN RESPONSE TO REPLICATION STRESS%REACTOME DATABASE ID RELEASE 57%176187		35	-0.511934	-1.70091	0.0105541	0.0236227	0.977	4270	tags=60%, list=27%, signal=82%
FGFR2 ALTERNATIVE SPLICING%REACTOME DATABASE ID RELEASE 57%6803529	FGFR2 ALTERNATIVE SPLICING%REACTOME DATABASE ID RELEASE 57%6803529		24	-0.553855	-1.6999	0.0195122	0.0237336	0.979	4410	tags=58%, list=28%, signal=80%
MITOTIC G2-G2 M PHASES%REACTOME DATABASE ID RELEASE 57%453274	MITOTIC G2-G2 M PHASES%REACTOME DATABASE ID RELEASE 57%453274		151	-0.383775	-1.69293	0	0.0249403	0.984	2513	tags=32%, list=16%, signal=38%
TNF SIGNALING%REACTOME%R-HSA-75893.2	TNF SIGNALING%REACTOME%R-HSA-75893.2		36	-0.494908	-1.69021	0.00543478	0.025398	0.986	2198	tags=36%, list=14%, signal=42%
ASYMMETRIC LOCALIZATION OF PCP PROTEINS%REACTOME%R-HSA-4608870.1	ASYMMETRIC LOCALIZATION OF PCP PROTEINS%REACTOME%R-HSA-4608870.1		51	-0.472456	-1.68873	0.0060241	0.0256464	0.986	2896	tags=45%, list=18%, signal=55%
3' -UTR-MEDIATED TRANSLATIONAL REGULATION%REACTOME DATABASE ID RELEASE 57%157279	3' -UTR-MEDIATED TRANSLATIONAL REGULATION%REACTOME DATABASE ID RELEASE 57%157279		51	-0.463663	-1.6862	0.00581395	0.026147	0.988	4114	tags=55%, list=26%, signal=74%
G2 M TRANSITION%REACTOME DATABASE ID RELEASE 57%69275	G2 M TRANSITION%REACTOME DATABASE ID RELEASE 57%69275		149	-0.385999	-1.6859	0	0.0260617	0.988	2513	tags=33%, list=16%, signal=39%
TRANSCRIPTION REGULATION BY BZIP TRANSCRIPTION FACTOR%PANTHER PATHWAY%P00055	TRANSCRIPTION REGULATION BY BZIP TRANSCRIPTION FACTOR%PANTHER PATHWAY%P00055		41	-0.487458	-1.68023	0.00555556	0.0272307	0.988	2989	tags=41%, list=19%, signal=51%
HEDGEHOG 'ON' STATE%REACTOME DATABASE ID RELEASE 57%5632684	HEDGEHOG 'ON' STATE%REACTOME DATABASE ID RELEASE 57%5632684		67	-0.435393	-1.67969	0.0060423	0.0272041	0.989	2814	tags=36%, list=18%, signal=43%
HALLMARK_E2F_TARGETS%MSIGDB_C2%HALLMARK_E2F_TARGETS	HALLMARK_E2F_TARGETS%MSIGDB_C2%HALLMARK_E2F_TARGETS		185	-0.373815	-1.67894	0	0.0272533	0.989	4043	tags=43%, list=25%, signal=57%
RNA POLYMERASE III TRANSCRIPTION INITIATION FROM TYPE 2 PROMOTER%REACTOME%R-HSA-76066.1	RNA POLYMERASE III TRANSCRIPTION INITIATION FROM TYPE 2 PROMOTER%REACTOME%R-HSA-76066.1		24	-0.555533	-1.67222	0.0070922	0.0287648	0.995	2011	tags=33%, list=13%, signal=38%
COPII (COAT PROTEIN 2) MEDIATED VESICLE TRANSPORT%REACTOME%R-HSA-204005.3	COPII (COAT PROTEIN 2) MEDIATED VESICLE TRANSPORT%REACTOME%R-HSA-204005.3		59	-0.449282	-1.66675	0.00558659	0.0300853	0.996	2626	tags=39%, list=16%, signal=46%
ORGANELLE BIOGENESIS AND MAINTENANCE%REACTOME%R-HSA-1852241.2	ORGANELLE BIOGENESIS AND MAINTENANCE%REACTOME%R-HSA-1852241.2		294	-0.353207	-1.66433	0	0.0305666	0.996	3078	tags=33%, list=19%, signal=40%
TCR SIGNALING%REACTOME%R-HSA-202403.3	TCR SIGNALING%REACTOME%R-HSA-202403.3		89	-0.410576	-1.66369	0.00310559	0.0306163	0.996	2835	tags=36%, list=18%, signal=43%
RNA POLYMERASE III TRANSCRIPTION TERMINATION%REACTOME DATABASE ID RELEASE 57%73980	RNA POLYMERASE III TRANSCRIPTION TERMINATION%REACTOME DATABASE ID RELEASE 57%73980		20	-0.567316	-1.66017	0.0175879	0.0314297	0.996	2641	tags=45%, list=16%, signal=54%
TRANSLATION%REACTOME DATABASE ID RELEASE 57%72766	TRANSLATION%REACTOME DATABASE ID RELEASE 57%72766		91	-0.411963	-1.65869	0	0.0316448	0.996	4238	tags=49%, list=26%, signal=67%
HALLMARK_UNFOLDED_PROTEIN_RESPONSE%MSIGDB_C2%HALLMARK_UNFOLDED_PROTEIN_RESPONSE	HALLMARK_UNFOLDED_PROTEIN_RESPONSE%MSIGDB_C2%HALLMARK_UNFOLDED_PROTEIN_RESPONSE		104	-0.407196	-1.65502	0	0.0324313	0.996	3653	tags=45%, list=23%, signal=58%
CHROMATIN MODIFYING ENZYMES%REACTOME%R-HSA-3247509.3	CHROMATIN MODIFYING ENZYMES%REACTOME%R-HSA-3247509.3		186	-0.366677	-1.65324	0	0.0328286	0.996	3764	tags=35%, list=23%, signal=46%
AURORA B SIGNALING%PATHWAY INTERACTION DATABASE NCI-NATURE CURATED DATA%AURORA B SIGNALING	AURORA B SIGNALING%PATHWAY INTERACTION DATABASE NCI-NATURE CURATED DATA%AURORA B SIGNALING		33	-0.494936	-1.64873	0.013089	0.0337259	0.997	2876	tags=36%, list=18%, signal=44%
NORC NEGATIVELY REGULATES RRNA EXPRESSION%REACTOME DATABASE ID RELEASE 57%427413	NORC NEGATIVELY REGULATES RRNA EXPRESSION%REACTOME DATABASE ID RELEASE 57%427413		50	-0.450564	-1.64504	0.00835655	0.0345925	0.997	1612	tags=22%, list=10%, signal=24%
PID_MYC_PATHWAY%MSIGDB_C2%PID_MYC_PATHWAY	PID_MYC_PATHWAY%MSIGDB_C2%PID_MYC_PATHWAY		19	-0.563699	-1.64454	0.00765306	0.0345676	0.997	4418	tags=63%, list=28%, signal=87%
NEGATIVE EPIGENETIC REGULATION OF RRNA EXPRESSION%REACTOME DATABASE ID RELEASE 57%5250941	NEGATIVE EPIGENETIC REGULATION OF RRNA EXPRESSION%REACTOME DATABASE ID RELEASE 57%5250941		53	-0.4497	-1.64152	0.00789474	0.0351703	0.998	1612	tags=23%, list=10%, signal=25%
CHROMATIN ORGANIZATION%REACTOME%R-HSA-4839726.2	CHROMATIN ORGANIZATION%REACTOME%R-HSA-4839726.2		186	-0.366677	-1.63729	0	0.036443	0.998	3764	tags=35%, list=23%, signal=46%
METABOLISM OF POLYAMINES%REACTOME%R-HSA-351202.2	METABOLISM OF POLYAMINES%REACTOME%R-HSA-351202.2		71	-0.416975	-1.63632	0	0.0364864	0.998	2842	tags=38%, list=18%, signal=46%
NUCLEOTIDE METABOLISM%REACTOME%R-HSA-15869.3	NUCLEOTIDE METABOLISM%REACTOME%R-HSA-15869.3		78	-0.413062	-1.63499	0.00286533	0.0367713	0.998	2715	tags=36%, list=17%, signal=43%
TELOMERE MAINTENANCE%REACTOME DATABASE ID RELEASE 57%157579	TELOMERE MAINTENANCE%REACTOME DATABASE ID RELEASE 57%157579		40	-0.466193	-1.63435	0.00546448	0.0367985	0.998	3611	tags=50%, list=23%, signal=64%
PID_AURORA_B_PATHWAY%MSIGDB_C2%PID_AURORA_B_PATHWAY	PID_AURORA_B_PATHWAY%MSIGDB_C2%PID_AURORA_B_PATHWAY		33	-0.494936	-1.63414	0.0027027	0.0366773	0.998	2876	tags=36%, list=18%, signal=44%
L13A-MEDIATED TRANSLATIONAL SILENCING OF CERULOPLASMIN EXPRESSION%REACTOME%R-HSA-156827.1	L13A-MEDIATED TRANSLATIONAL SILENCING OF CERULOPLASMIN EXPRESSION%REACTOME%R-HSA-156827.1		51	-0.463663	-1.63124	0	0.0374633	0.998	4114	tags=55%, list=26%, signal=74%
INTRINSIC PATHWAY FOR APOPTOSIS%REACTOME DATABASE ID RELEASE 57%109606	INTRINSIC PATHWAY FOR APOPTOSIS%REACTOME DATABASE ID RELEASE 57%109606		34	-0.490565	-1.63032	0.0057971	0.037547	0.998	1207	tags=24%, list=8%, signal=25%
AURORA A SIGNALING%PATHWAY INTERACTION DATABASE NCI-NATURE CURATED DATA%AURORA A SIGNALING	AURORA A SIGNALING%PATHWAY INTERACTION DATABASE NCI-NATURE CURATED DATA%AURORA A SIGNALING		29	-0.513944	-1.62907	0.0128866	0.0377382	0.998	2778	tags=41%, list=17%, signal=50%
TCF DEPENDENT SIGNALING IN RESPONSE TO WNT%REACTOME DATABASE ID RELEASE 57%201681	TCF DEPENDENT SIGNALING IN RESPONSE TO WNT%REACTOME DATABASE ID RELEASE 57%201681		162	-0.367966	-1.62515	0	0.0387413	0.998	2941	tags=28%, list=18%, signal=34%
POST-ELONGATION PROCESSING OF INTRON-CONTAINING PRE-MRNA%REACTOME DATABASE ID RELEASE 57%112296	POST-ELONGATION PROCESSING OF INTRON-CONTAINING PRE-MRNA%REACTOME DATABASE ID RELEASE 57%112296		41	-0.456736	-1.62425	0.00810811	0.0388791	0.998	3577	tags=56%, list=22%, signal=72%
BIOCARTA_EIF4_PATHWAY%MSIGDB_C2%BIOCARTA_EIF4_PATHWAY	BIOCARTA_EIF4_PATHWAY%MSIGDB_C2%BIOCARTA_EIF4_PATHWAY		23	-0.52836	-1.62105	0.0246305	0.0396904	0.998	3549	tags=48%, list=22%, signal=61%
RNA POLYMERASE III CHAIN ELONGATION%REACTOME%R-HSA-73780.1	RNA POLYMERASE III CHAIN ELONGATION%REACTOME%R-HSA-73780.1		16	-0.591171	-1.6208	0.016	0.0395995	0.998	3583	tags=56%, list=22%, signal=72%
PID_AURORA_A_PATHWAY%MSIGDB_C2%PID_AURORA_A_PATHWAY	PID_AURORA_A_PATHWAY%MSIGDB_C2%PID_AURORA_A_PATHWAY		29	-0.513944	-1.61964	0.0150376	0.0397984	0.998	2778	tags=41%, list=17%, signal=50%
TP53 REGULATES TRANSCRIPTION OF ADDITIONAL CELL CYCLE GENES WHOSE EXACT ROLE IN THE P53 PATHWAY REMAIN UNCERTAIN%REACTOME DATABASE ID RELEASE 57%6804115	TP53 REGULATES TRANSCRIPTION OF ADDITIONAL CELL CYCLE GENES WHOSE EXACT ROLE IN THE P53 PATHWAY REMAIN UNCERTAIN%REACTOME DATABASE ID RELEASE 57%6804115		19	-0.559275	-1.61808	0.0239808	0.0400888	0.998	4674	tags=63%, list=29%, signal=89%
CLEAVAGE OF GROWING TRANSCRIPT IN THE TERMINATION REGION%REACTOME DATABASE ID RELEASE 57%109688	CLEAVAGE OF GROWING TRANSCRIPT IN THE TERMINATION REGION%REACTOME DATABASE ID RELEASE 57%109688		47	-0.444689	-1.61525	0.00514139	0.0408747	0.998	3577	tags=57%, list=22%, signal=74%
TRNA PROCESSING%REACTOME%R-HSA-72306.4	TRNA PROCESSING%REACTOME%R-HSA-72306.4		86	-0.407275	-1.60825	0	0.043017	0.998	3421	tags=36%, list=21%, signal=46%
RNA POLYMERASE II TRANSCRIPTION TERMINATION%REACTOME%R-HSA-73856.1	RNA POLYMERASE II TRANSCRIPTION TERMINATION%REACTOME%R-HSA-73856.1		47	-0.444689	-1.60306	0.0219178	0.0448086	0.999	3577	tags=57%, list=22%, signal=74%
PREFOLDIN MEDIATED TRANSFER OF SUBSTRATE TO CCT TRIC%REACTOME%R-HSA-389957.1	PREFOLDIN MEDIATED TRANSFER OF SUBSTRATE TO CCT TRIC%REACTOME%R-HSA-389957.1		25	-0.515271	-1.59965	0.0100503	0.0458412	0.999	3600	tags=56%, list=22%, signal=72%
TRANSPORT OF MATURE MRNA DERIVED FROM AN INTRON-CONTAINING TRANSCRIPT%REACTOME%R-HSA-159236.2	TRANSPORT OF MATURE MRNA DERIVED FROM AN INTRON-CONTAINING TRANSCRIPT%REACTOME%R-HSA-159236.2		51	-0.436501	-1.59723	0.0112676	0.0464548	0.999	3577	tags=39%, list=22%, signal=50%
BIOCARTA_CERAMIDE_PATHWAY%MSIGDB_C2%BIOCARTA_CERAMIDE_PATHWAY	BIOCARTA_CERAMIDE_PATHWAY%MSIGDB_C2%BIOCARTA_CERAMIDE_PATHWAY		21	-0.52715	-1.59571	0.0177665	0.0468099	0.999	1985	tags=33%, list=12%, signal=38%
RETROGRADE TRANSPORT AT THE TRANS-GOLGI-NETWORK%REACTOME%R-HSA-6811440.1	RETROGRADE TRANSPORT AT THE TRANS-GOLGI-NETWORK%REACTOME%R-HSA-6811440.1		43	-0.447218	-1.59517	0.00763359	0.0467783	0.999	3180	tags=35%, list=20%, signal=43%
TP53 REGULATES TRANSCRIPTION OF DNA REPAIR GENES%REACTOME DATABASE ID RELEASE 57%6796648	TP53 REGULATES TRANSCRIPTION OF DNA REPAIR GENES%REACTOME DATABASE ID RELEASE 57%6796648		57	-0.427535	-1.59344	0.002849	0.0472627	1	3734	tags=49%, list=23%, signal=64%
C-MYC PATHWAY%PATHWAY INTERACTION DATABASE NCI-NATURE CURATED DATA%C-MYC PATHWAY	C-MYC PATHWAY%PATHWAY INTERACTION DATABASE NCI-NATURE CURATED DATA%C-MYC PATHWAY		19	-0.563699	-1.5918	0.0298507	0.0476971	1	4418	tags=63%, list=28%, signal=87%
INTERACTIONS OF VPR WITH HOST CELLULAR PROTEINS%REACTOME%R-HSA-176033.1	INTERACTIONS OF VPR WITH HOST CELLULAR PROTEINS%REACTOME%R-HSA-176033.1		26	-0.518485	-1.59082	0.0149626	0.0478566	1	2290	tags=27%, list=14%, signal=31%
ABC TRANSPORTERS IN LIPID HOMEOSTASIS%REACTOME DATABASE ID RELEASE 57%1369062	ABC TRANSPORTERS IN LIPID HOMEOSTASIS%REACTOME DATABASE ID RELEASE 57%1369062		17	-0.578691	-1.58632	0.0261283	0.049357	1	1194	tags=29%, list=7%, signal=32%
BIOCARTA_RACCYCD_PATHWAY%MSIGDB_C2%BIOCARTA_RACCYCD_PATHWAY	BIOCARTA_RACCYCD_PATHWAY%MSIGDB_C2%BIOCARTA_RACCYCD_PATHWAY		24	-0.513134	-1.5861	0.0169082	0.0492134	1	3633	tags=50%, list=23%, signal=65%
POST-ELONGATION PROCESSING OF THE TRANSCRIPT%REACTOME%R-HSA-76044.1	POST-ELONGATION PROCESSING OF THE TRANSCRIPT%REACTOME%R-HSA-76044.1		47	-0.444689	-1.57814	0.00987654	0.0519612	1	3577	tags=57%, list=22%, signal=74%
TNFR2 NON-CANONICAL NF-KB PATHWAY%REACTOME%R-HSA-5668541.1	TNFR2 NON-CANONICAL NF-KB PATHWAY%REACTOME%R-HSA-5668541.1		82	-0.401076	-1.57672	0.00311526	0.0522972	1	2512	tags=33%, list=16%, signal=39%
EUKARYOTIC TRANSLATION ELONGATION%REACTOME DATABASE ID RELEASE 57%156842	EUKARYOTIC TRANSLATION ELONGATION%REACTOME DATABASE ID RELEASE 57%156842		36	-0.459307	-1.57333	0.00808625	0.0533978	1	3578	tags=53%, list=22%, signal=68%
P75(NTR)-MEDIATED SIGNALING%PATHWAY INTERACTION DATABASE NCI-NATURE CURATED DATA%P75(NTR)-MEDIATED SIGNALING	P75(NTR)-MEDIATED SIGNALING%PATHWAY INTERACTION DATABASE NCI-NATURE CURATED DATA%P75(NTR)-MEDIATED SIGNALING		59	-0.416939	-1.57261	0.0137741	0.0534792	1	2198	tags=25%, list=14%, signal=29%
PARKINSON DISEASE%PANTHER PATHWAY%P00049	PARKINSON DISEASE%PANTHER PATHWAY%P00049		76	-0.403685	-1.57128	0.00571429	0.0538321	1	2854	tags=32%, list=18%, signal=38%
COOPERATION OF PREFOLDIN AND TRIC CCT IN ACTIN AND TUBULIN FOLDING%REACTOME DATABASE ID RELEASE 57%389958	COOPERATION OF PREFOLDIN AND TRIC CCT IN ACTIN AND TUBULIN FOLDING%REACTOME DATABASE ID RELEASE 57%389958		28	-0.490467	-1.56662	0.0148148	0.0555003	1	3600	tags=50%, list=22%, signal=64%
DNA DAMAGE RECOGNITION IN GG-NER%REACTOME%R-HSA-5696394.1	DNA DAMAGE RECOGNITION IN GG-NER%REACTOME%R-HSA-5696394.1		30	-0.485355	-1.56089	0.0350877	0.0576522	1	3600	tags=50%, list=22%, signal=64%
MRNA 3'-END PROCESSING%REACTOME%R-HSA-72187.2	MRNA 3'-END PROCESSING%REACTOME%R-HSA-72187.2		41	-0.456736	-1.55759	0.0140056	0.0588474	1	3577	tags=56%, list=22%, signal=72%
BIOCARTA_RELA_PATHWAY%MSIGDB_C2%BIOCARTA_RELA_PATHWAY	BIOCARTA_RELA_PATHWAY%MSIGDB_C2%BIOCARTA_RELA_PATHWAY		16	-0.563955	-1.55409	0.0338542	0.0601572	1	2582	tags=50%, list=16%, signal=60%
PID_P75_NTR_PATHWAY%MSIGDB_C2%PID_P75_NTR_PATHWAY	PID_P75_NTR_PATHWAY%MSIGDB_C2%PID_P75_NTR_PATHWAY		60	-0.409126	-1.55295	0.0117994	0.0604058	1	2198	tags=25%, list=14%, signal=29%
UBIQUITIN PROTEASOME PATHWAY%PANTHER PATHWAY%P00060	UBIQUITIN PROTEASOME PATHWAY%PANTHER PATHWAY%P00060		37	-0.458956	-1.55221	0.0161725	0.060457	1	2875	tags=38%, list=18%, signal=46%
BIOCARTA_AKT_PATHWAY%MSIGDB_C2%BIOCARTA_AKT_PATHWAY	BIOCARTA_AKT_PATHWAY%MSIGDB_C2%BIOCARTA_AKT_PATHWAY		21	-0.528616	-1.54998	0.0332542	0.0612222	1	3633	tags=48%, list=23%, signal=61%
BIOCARTA_MTOR_PATHWAY%MSIGDB_C2%BIOCARTA_MTOR_PATHWAY	BIOCARTA_MTOR_PATHWAY%MSIGDB_C2%BIOCARTA_MTOR_PATHWAY		20	-0.528942	-1.54082	0.0291777	0.0652082	1	3549	tags=45%, list=22%, signal=58%
RNA POLYMERASE III TRANSCRIPTION INITIATION FROM TYPE 1 PROMOTER%REACTOME%R-HSA-76061.1	RNA POLYMERASE III TRANSCRIPTION INITIATION FROM TYPE 1 PROMOTER%REACTOME%R-HSA-76061.1		25	-0.497698	-1.53913	0.0395062	0.0658621	1	2011	tags=32%, list=13%, signal=37%
PROGRAMMED CELL DEATH%REACTOME%R-HSA-5357801.1	PROGRAMMED CELL DEATH%REACTOME%R-HSA-5357801.1		135	-0.355317	-1.53878	0	0.0657817	1	2732	tags=32%, list=17%, signal=38%
TRANSFERRIN ENDOCYTOSIS AND RECYCLING%REACTOME DATABASE ID RELEASE 57%917977	TRANSFERRIN ENDOCYTOSIS AND RECYCLING%REACTOME DATABASE ID RELEASE 57%917977		27	-0.493149	-1.53151	0.019656	0.0688848	1	4382	tags=63%, list=27%, signal=86%
ST_PHOSPHOINOSITIDE_3_KINASE_PATHWAY%MSIGDB_C2%ST_PHOSPHOINOSITIDE_3_KINASE_PATHWAY	ST_PHOSPHOINOSITIDE_3_KINASE_PATHWAY%MSIGDB_C2%ST_PHOSPHOINOSITIDE_3_KINASE_PATHWAY		32	-0.466538	-1.52997	0.0210526	0.069408	1	738	tags=19%, list=5%, signal=20%
KSRP (KHSRP) BINDS AND DESTABILIZES MRNA%REACTOME%R-HSA-450604.2	KSRP (KHSRP) BINDS AND DESTABILIZES MRNA%REACTOME%R-HSA-450604.2		15	-0.55724	-1.52644	0.0498866	0.0707659	1	2732	tags=47%, list=17%, signal=56%
GLUCONEOGENESIS%REACTOME DATABASE ID RELEASE 57%70263	GLUCONEOGENESIS%REACTOME DATABASE ID RELEASE 57%70263		26	-0.483765	-1.5225	0.036855	0.0726217	1	3312	tags=50%, list=21%, signal=63%
APOPTOSIS%REACTOME%R-HSA-109581.2	APOPTOSIS%REACTOME%R-HSA-109581.2		132	-0.359268	-1.52028	0.00333333	0.073538	1	2732	tags=32%, list=17%, signal=38%
BIOCARTA_MCM_PATHWAY%MSIGDB_C2%BIOCARTA_MCM_PATHWAY	BIOCARTA_MCM_PATHWAY%MSIGDB_C2%BIOCARTA_MCM_PATHWAY		18	-0.542457	-1.51481	0.0429594	0.0760719	1	4270	tags=61%, list=27%, signal=83%
U12 DEPENDENT SPLICING%REACTOME DATABASE ID RELEASE 57%72165	U12 DEPENDENT SPLICING%REACTOME DATABASE ID RELEASE 57%72165		45	-0.420096	-1.51187	0.0372493	0.0773844	1	3734	tags=51%, list=23%, signal=66%
BIOCARTA_MITOCHONDRIA_PATHWAY%MSIGDB_C2%BIOCARTA_MITOCHONDRIA_PATHWAY	BIOCARTA_MITOCHONDRIA_PATHWAY%MSIGDB_C2%BIOCARTA_MITOCHONDRIA_PATHWAY		20	-0.508835	-1.50075	0.0384615	0.0834438	1	632	tags=25%, list=4%, signal=26%
RHO GTPASES ACTIVATE FORMINS%REACTOME%R-HSA-5663220.1	RHO GTPASES ACTIVATE FORMINS%REACTOME%R-HSA-5663220.1		101	-0.362952	-1.49819	0	0.084605	1	4077	tags=41%, list=25%, signal=54%
TRANSPORT OF MATURE MRNAS DERIVED FROM INTRONLESS TRANSCRIPTS%REACTOME%R-HSA-159234.1	TRANSPORT OF MATURE MRNAS DERIVED FROM INTRONLESS TRANSCRIPTS%REACTOME%R-HSA-159234.1		31	-0.452053	-1.49617	0.046875	0.0854088	1	3477	tags=35%, list=22%, signal=45%
ROS, RNS PRODUCTION IN RESPONSE TO BACTERIA%REACTOME%R-HSA-1222556.4	ROS, RNS PRODUCTION IN RESPONSE TO BACTERIA%REACTOME%R-HSA-1222556.4		33	-0.447048	-1.49202	0.0363636	0.0876345	1	3831	tags=48%, list=24%, signal=64%
FORMATION OF A POOL OF FREE 40S SUBUNITS%REACTOME DATABASE ID RELEASE 57%72689	FORMATION OF A POOL OF FREE 40S SUBUNITS%REACTOME DATABASE ID RELEASE 57%72689		42	-0.417949	-1.48872	0.0299728	0.0893515	1	4114	tags=55%, list=26%, signal=73%
VIRAL MESSENGER RNA SYNTHESIS%REACTOME%R-HSA-168325.1	VIRAL MESSENGER RNA SYNTHESIS%REACTOME%R-HSA-168325.1		34	-0.448941	-1.48172	0.038961	0.0937441	1	3734	tags=32%, list=23%, signal=42%
DEPOSITION OF NEW CENPA-CONTAINING NUCLEOSOMES AT THE CENTROMERE%REACTOME%R-HSA-606279.1	DEPOSITION OF NEW CENPA-CONTAINING NUCLEOSOMES AT THE CENTROMERE%REACTOME%R-HSA-606279.1		33	-0.447047	-1.47413	0.0321716	0.0982622	1	4043	tags=48%, list=25%, signal=65%
TNFR1-INDUCED NFKAPPAB SIGNALING PATHWAY%REACTOME DATABASE ID RELEASE 57%5357956	TNFR1-INDUCED NFKAPPAB SIGNALING PATHWAY%REACTOME DATABASE ID RELEASE 57%5357956		24	-0.474682	-1.46734	0.0440098	0.102286	1	2198	tags=33%, list=14%, signal=39%
DEATH RECEPTOR SIGNALLING%REACTOME DATABASE ID RELEASE 57%73887	DEATH RECEPTOR SIGNALLING%REACTOME DATABASE ID RELEASE 57%73887		40	-0.415015	-1.4643	0.0360111	0.103951	1	2198	tags=33%, list=14%, signal=38%
ANTIGEN PROCESSING: UBIQUITINATION & PROTEASOME DEGRADATION%REACTOME DATABASE ID RELEASE 57%983168	ANTIGEN PROCESSING: UBIQUITINATION & PROTEASOME DEGRADATION%REACTOME DATABASE ID RELEASE 57%983168		260	-0.307488	-1.45913	0	0.107536	1	2512	tags=24%, list=16%, signal=28%
REGULATION OF TNFR1 SIGNALING%REACTOME%R-HSA-5357905.2	REGULATION OF TNFR1 SIGNALING%REACTOME%R-HSA-5357905.2		26	-0.469073	-1.45799	0.0392157	0.107954	1	2198	tags=38%, list=14%, signal=44%
BIOSYNTHESIS OF THE N-GLYCAN PRECURSOR (DOLICHOL LIPID-LINKED OLIGOSACCHARIDE, LLO) AND TRANSFER TO A NASCENT PROTEIN%REACTOME DATABASE ID RELEASE 57%446193	BIOSYNTHESIS OF THE N-GLYCAN PRECURSOR (DOLICHOL LIPID-LINKED OLIGOSACCHARIDE, LLO) AND TRANSFER TO A NASCENT PROTEIN%REACTOME DATABASE ID RELEASE 57%446193		67	-0.381806	-1.45638	0.0248619	0.108692	1	2550	tags=33%, list=16%, signal=39%
NUCLEOSOME ASSEMBLY%REACTOME DATABASE ID RELEASE 57%774815	NUCLEOSOME ASSEMBLY%REACTOME DATABASE ID RELEASE 57%774815		33	-0.447047	-1.45032	0.0484694	0.112596	1	4043	tags=48%, list=25%, signal=65%
TELOMERE C-STRAND (LAGGING STRAND) SYNTHESIS%REACTOME%R-HSA-174417.2	TELOMERE C-STRAND (LAGGING STRAND) SYNTHESIS%REACTOME%R-HSA-174417.2		22	-0.48187	-1.44848	0.0564972	0.113471	1	3611	tags=55%, list=23%, signal=70%
SENESCENCE-ASSOCIATED SECRETORY PHENOTYPE (SASP)%REACTOME%R-HSA-2559582.2	SENESCENCE-ASSOCIATED SECRETORY PHENOTYPE (SASP)%REACTOME%R-HSA-2559582.2		52	-0.395913	-1.44169	0.0504451	0.118176	1	2865	tags=37%, list=18%, signal=44%
AMINO ACID AND DERIVATIVE METABOLISM%REACTOME%R-HSA-71291.3	AMINO ACID AND DERIVATIVE METABOLISM%REACTOME%R-HSA-71291.3		252	-0.31126	-1.44158	0	0.117823	1	3010	tags=31%, list=19%, signal=37%
IL2 SIGNALING EVENTS MEDIATED BY STAT5%PATHWAY INTERACTION DATABASE NCI-NATURE CURATED DATA%IL2 SIGNALING EVENTS MEDIATED BY STAT5	IL2 SIGNALING EVENTS MEDIATED BY STAT5%PATHWAY INTERACTION DATABASE NCI-NATURE CURATED DATA%IL2 SIGNALING EVENTS MEDIATED BY STAT5		29	-0.439643	-1.44104	0.040107	0.117817	1	1437	tags=17%, list=9%, signal=19%
VALIDATED NUCLEAR ESTROGEN RECEPTOR ALPHA NETWORK%PATHWAY INTERACTION DATABASE NCI-NATURE CURATED DATA%VALIDATED NUCLEAR ESTROGEN RECEPTOR ALPHA NETWORK	VALIDATED NUCLEAR ESTROGEN RECEPTOR ALPHA NETWORK%PATHWAY INTERACTION DATABASE NCI-NATURE CURATED DATA%VALIDATED NUCLEAR ESTROGEN RECEPTOR ALPHA NETWORK		53	-0.385538	-1.43417	0.0240642	0.122692	1	2429	tags=32%, list=15%, signal=38%
COPI-DEPENDENT GOLGI-TO-ER RETROGRADE TRAFFIC%REACTOME%R-HSA-6811434.1	COPI-DEPENDENT GOLGI-TO-ER RETROGRADE TRAFFIC%REACTOME%R-HSA-6811434.1		70	-0.366936	-1.43075	0.0208333	0.125053	1	4427	tags=44%, list=28%, signal=61%
PID_IL2_STAT5_PATHWAY%MSIGDB_C2%PID_IL2_STAT5_PATHWAY	PID_IL2_STAT5_PATHWAY%MSIGDB_C2%PID_IL2_STAT5_PATHWAY		29	-0.439643	-1.43037	0.0489691	0.124944	1	1437	tags=17%, list=9%, signal=19%
PORPHYRIN METABOLISM%REACTOME DATABASE ID RELEASE 57%189445	PORPHYRIN METABOLISM%REACTOME DATABASE ID RELEASE 57%189445		16	-0.503585	-1.42651	0.0698795	0.127766	1	3409	tags=44%, list=21%, signal=56%
TRANSCRIPTIONAL REGULATION BY SMALL RNAS%REACTOME DATABASE ID RELEASE 57%5578749	TRANSCRIPTIONAL REGULATION BY SMALL RNAS%REACTOME DATABASE ID RELEASE 57%5578749		46	-0.39913	-1.42519	0.0275482	0.12838	1	2789	tags=22%, list=17%, signal=26%
PKMTS METHYLATE HISTONE LYSINES%REACTOME%R-HSA-3214841.2	PKMTS METHYLATE HISTONE LYSINES%REACTOME%R-HSA-3214841.2		36	-0.422763	-1.42498	0.057377	0.128078	1	4193	tags=44%, list=26%, signal=60%
INFLUENZA LIFE CYCLE%REACTOME DATABASE ID RELEASE 57%168255	INFLUENZA LIFE CYCLE%REACTOME DATABASE ID RELEASE 57%168255		76	-0.367481	-1.42341	0.0429448	0.128925	1	3734	tags=36%, list=23%, signal=46%
INFLUENZA VIRAL RNA TRANSCRIPTION AND REPLICATION%REACTOME DATABASE ID RELEASE 57%168273	INFLUENZA VIRAL RNA TRANSCRIPTION AND REPLICATION%REACTOME DATABASE ID RELEASE 57%168273		69	-0.3709	-1.42174	0.0327381	0.129945	1	3734	tags=38%, list=23%, signal=49%
GAP-FILLING DNA REPAIR SYNTHESIS AND LIGATION IN GG-NER%REACTOME%R-HSA-5696397.1	GAP-FILLING DNA REPAIR SYNTHESIS AND LIGATION IN GG-NER%REACTOME%R-HSA-5696397.1		19	-0.495665	-1.41932	0.0737101	0.131388	1	3611	tags=53%, list=23%, signal=68%
ENOS ACTIVATION AND REGULATION%REACTOME%R-HSA-203765.1	ENOS ACTIVATION AND REGULATION%REACTOME%R-HSA-203765.1		18	-0.501613	-1.4178	0.0909091	0.132192	1	3980	tags=56%, list=25%, signal=74%
DEUBIQUITINATION%REACTOME%R-HSA-5688426.1	DEUBIQUITINATION%REACTOME%R-HSA-5688426.1		210	-0.306552	-1.41691	0	0.132497	1	2994	tags=30%, list=19%, signal=37%
PID_ERA_GENOMIC_PATHWAY%MSIGDB_C2%PID_ERA_GENOMIC_PATHWAY	PID_ERA_GENOMIC_PATHWAY%MSIGDB_C2%PID_ERA_GENOMIC_PATHWAY		53	-0.385538	-1.41002	0.0428571	0.137984	1	2429	tags=32%, list=15%, signal=38%
METABOLISM OF NITRIC OXIDE%REACTOME%R-HSA-202131.1	METABOLISM OF NITRIC OXIDE%REACTOME%R-HSA-202131.1		18	-0.501613	-1.40787	0.0942928	0.13939	1	3980	tags=56%, list=25%, signal=74%
PID_IL2_PI3K_PATHWAY%MSIGDB_C2%PID_IL2_PI3K_PATHWAY	PID_IL2_PI3K_PATHWAY%MSIGDB_C2%PID_IL2_PI3K_PATHWAY		31	-0.428095	-1.40257	0.0578512	0.143617	1	497	tags=13%, list=3%, signal=13%
FORMATION OF INCISION COMPLEX IN GG-NER%REACTOME%R-HSA-5696395.1	FORMATION OF INCISION COMPLEX IN GG-NER%REACTOME%R-HSA-5696395.1		35	-0.41965	-1.40001	0.0594595	0.14527	1	3611	tags=40%, list=23%, signal=52%
IL2 SIGNALING EVENTS MEDIATED BY PI3K%PATHWAY INTERACTION DATABASE NCI-NATURE CURATED DATA%IL2 SIGNALING EVENTS MEDIATED BY PI3K	IL2 SIGNALING EVENTS MEDIATED BY PI3K%PATHWAY INTERACTION DATABASE NCI-NATURE CURATED DATA%IL2 SIGNALING EVENTS MEDIATED BY PI3K		31	-0.428095	-1.39994	0.0628272	0.14483	1	497	tags=13%, list=3%, signal=13%
ACTIVATION OF RRNA EXPRESSION BY ERCC6 (CSB) AND EHMT2 (G9A)%REACTOME%R-HSA-427389.1	ACTIVATION OF RRNA EXPRESSION BY ERCC6 (CSB) AND EHMT2 (G9A)%REACTOME%R-HSA-427389.1		25	-0.454353	-1.3938	0.0728643	0.149811	1	3370	tags=36%, list=21%, signal=46%
CLASS I MHC MEDIATED ANTIGEN PROCESSING & PRESENTATION%REACTOME%R-HSA-983169.2	CLASS I MHC MEDIATED ANTIGEN PROCESSING & PRESENTATION%REACTOME%R-HSA-983169.2		309	-0.297906	-1.39361	0	0.149484	1	2512	tags=24%, list=16%, signal=28%
CLASS I PI3K SIGNALING EVENTS MEDIATED BY AKT%PATHWAY INTERACTION DATABASE NCI-NATURE CURATED DATA%CLASS I PI3K SIGNALING EVENTS MEDIATED BY AKT	CLASS I PI3K SIGNALING EVENTS MEDIATED BY AKT%PATHWAY INTERACTION DATABASE NCI-NATURE CURATED DATA%CLASS I PI3K SIGNALING EVENTS MEDIATED BY AKT		33	-0.419309	-1.3924	0.0576923	0.150024	1	3065	tags=42%, list=19%, signal=52%
PID_PI3KCI_AKT_PATHWAY%MSIGDB_C2%PID_PI3KCI_AKT_PATHWAY	PID_PI3KCI_AKT_PATHWAY%MSIGDB_C2%PID_PI3KCI_AKT_PATHWAY		33	-0.419309	-1.38733	0.0866142	0.154112	1	3065	tags=42%, list=19%, signal=52%
BRANCHED-CHAIN AMINO ACID CATABOLISM%REACTOME DATABASE ID RELEASE 57%70895	BRANCHED-CHAIN AMINO ACID CATABOLISM%REACTOME DATABASE ID RELEASE 57%70895		22	-0.463556	-1.38498	0.0559796	0.1558	1	2964	tags=50%, list=18%, signal=61%
ATR SIGNALING PATHWAY%PATHWAY INTERACTION DATABASE NCI-NATURE CURATED DATA%ATR SIGNALING PATHWAY	ATR SIGNALING PATHWAY%PATHWAY INTERACTION DATABASE NCI-NATURE CURATED DATA%ATR SIGNALING PATHWAY		37	-0.404425	-1.38256	0.0628141	0.157589	1	4890	tags=51%, list=30%, signal=74%
SELENOAMINO ACID METABOLISM%REACTOME%R-HSA-2408522.1	SELENOAMINO ACID METABOLISM%REACTOME%R-HSA-2408522.1		55	-0.367906	-1.37916	0.0607735	0.160328	1	3520	tags=42%, list=22%, signal=53%
ER TO GOLGI ANTEROGRADE TRANSPORT%REACTOME DATABASE ID RELEASE 57%199977	ER TO GOLGI ANTEROGRADE TRANSPORT%REACTOME DATABASE ID RELEASE 57%199977		110	-0.33534	-1.3791	0.0258065	0.159865	1	3570	tags=35%, list=22%, signal=44%
VALIDATED TARGETS OF C-MYC TRANSCRIPTIONAL ACTIVATION%PATHWAY INTERACTION DATABASE NCI-NATURE CURATED DATA%VALIDATED TARGETS OF C-MYC TRANSCRIPTIONAL ACTIVATION	VALIDATED TARGETS OF C-MYC TRANSCRIPTIONAL ACTIVATION%PATHWAY INTERACTION DATABASE NCI-NATURE CURATED DATA%VALIDATED TARGETS OF C-MYC TRANSCRIPTIONAL ACTIVATION		60	-0.36757	-1.37876	0.0408163	0.159642	1	2297	tags=25%, list=14%, signal=29%
VXPX CARGO-TARGETING TO CILIUM%REACTOME%R-HSA-5620916.1	VXPX CARGO-TARGETING TO CILIUM%REACTOME%R-HSA-5620916.1		20	-0.471841	-1.37845	0.0926829	0.159388	1	1724	tags=30%, list=11%, signal=34%
HEDGEHOG 'OFF' STATE%REACTOME%R-HSA-5610787.1	HEDGEHOG 'OFF' STATE%REACTOME%R-HSA-5610787.1		83	-0.345053	-1.3778	0.0331325	0.159453	1	2512	tags=31%, list=16%, signal=37%
TRANSPORT OF MATURE MRNA DERIVED FROM AN INTRONLESS TRANSCRIPT%REACTOME%R-HSA-159231.1	TRANSPORT OF MATURE MRNA DERIVED FROM AN INTRONLESS TRANSCRIPT%REACTOME%R-HSA-159231.1		30	-0.422871	-1.37753	0.0716113	0.159208	1	3477	tags=33%, list=22%, signal=42%
ATF4 ACTIVATES GENES%REACTOME%R-HSA-380994.1	ATF4 ACTIVATES GENES%REACTOME%R-HSA-380994.1		21	-0.468289	-1.37628	0.0892388	0.159919	1	1867	tags=33%, list=12%, signal=38%
UB-SPECIFIC PROCESSING PROTEASES%REACTOME DATABASE ID RELEASE 57%5689880	UB-SPECIFIC PROCESSING PROTEASES%REACTOME DATABASE ID RELEASE 57%5689880		145	-0.318855	-1.37319	0.0194553	0.162501	1	3863	tags=38%, list=24%, signal=50%
PID_LIS1_PATHWAY%MSIGDB_C2%PID_LIS1_PATHWAY	PID_LIS1_PATHWAY%MSIGDB_C2%PID_LIS1_PATHWAY		23	-0.455797	-1.37124	0.100271	0.163857	1	2822	tags=39%, list=18%, signal=47%
BIOCARTA_IGF1MTOR_PATHWAY%MSIGDB_C2%BIOCARTA_IGF1MTOR_PATHWAY	BIOCARTA_IGF1MTOR_PATHWAY%MSIGDB_C2%BIOCARTA_IGF1MTOR_PATHWAY		17	-0.481346	-1.36856	0.100239	0.165976	1	3653	tags=59%, list=23%, signal=76%
DNA STRAND ELONGATION%REACTOME%R-HSA-69190.1	DNA STRAND ELONGATION%REACTOME%R-HSA-69190.1		30	-0.425461	-1.36639	0.0793269	0.167738	1	3611	tags=47%, list=23%, signal=60%
CARGO TRAFFICKING TO THE PERICILIARY MEMBRANE%REACTOME%R-HSA-5620920.1	CARGO TRAFFICKING TO THE PERICILIARY MEMBRANE%REACTOME%R-HSA-5620920.1		46	-0.378525	-1.36451	0.0366492	0.169015	1	3023	tags=33%, list=19%, signal=40%
PERK REGULATES GENE EXPRESSION%REACTOME DATABASE ID RELEASE 57%381042	PERK REGULATES GENE EXPRESSION%REACTOME DATABASE ID RELEASE 57%381042		24	-0.437163	-1.36371	0.0947631	0.169291	1	1867	tags=29%, list=12%, signal=33%
TRANSCRIPTIONAL REGULATION BY TP53%REACTOME DATABASE ID RELEASE 57%3700989	TRANSCRIPTIONAL REGULATION BY TP53%REACTOME DATABASE ID RELEASE 57%3700989		289	-0.287667	-1.36246	0.00507614	0.169995	1	2957	tags=28%, list=18%, signal=34%
GLYOXYLATE METABOLISM AND GLYCINE DEGRADATION%REACTOME%R-HSA-389661.4	GLYOXYLATE METABOLISM AND GLYCINE DEGRADATION%REACTOME%R-HSA-389661.4		25	-0.43525	-1.35644	0.080402	0.175872	1	3558	tags=44%, list=22%, signal=56%
PID_MYC_ACTIV_PATHWAY%MSIGDB_C2%PID_MYC_ACTIV_PATHWAY	PID_MYC_ACTIV_PATHWAY%MSIGDB_C2%PID_MYC_ACTIV_PATHWAY		61	-0.365065	-1.35633	0.0530973	0.175412	1	2297	tags=25%, list=14%, signal=29%
SUMOYLATION OF DNA REPLICATION PROTEINS%REACTOME%R-HSA-4615885.2	SUMOYLATION OF DNA REPLICATION PROTEINS%REACTOME%R-HSA-4615885.2		33	-0.411421	-1.35073	0.0658228	0.180813	1	2876	tags=27%, list=18%, signal=33%
SUMOYLATION%REACTOME DATABASE ID RELEASE 57%2990846	SUMOYLATION%REACTOME DATABASE ID RELEASE 57%2990846		83	-0.341354	-1.35016	0.0289389	0.180778	1	3737	tags=33%, list=23%, signal=42%
LISSENCEPHALY GENE (LIS1) IN NEURONAL MIGRATION AND DEVELOPMENT%PATHWAY INTERACTION DATABASE NCI-NATURE CURATED DATA%LISSENCEPHALY GENE (LIS1) IN NEURONAL MIGRATION AND DEVELOPMENT	LISSENCEPHALY GENE (LIS1) IN NEURONAL MIGRATION AND DEVELOPMENT%PATHWAY INTERACTION DATABASE NCI-NATURE CURATED DATA%LISSENCEPHALY GENE (LIS1) IN NEURONAL MIGRATION AND DEVELOPMENT		23	-0.455797	-1.34739	0.0936709	0.183252	1	2822	tags=39%, list=18%, signal=47%
MAPK6 MAPK4 SIGNALING%REACTOME DATABASE ID RELEASE 57%5687128	MAPK6 MAPK4 SIGNALING%REACTOME DATABASE ID RELEASE 57%5687128		73	-0.344998	-1.34464	0.0404624	0.185607	1	2302	tags=30%, list=14%, signal=35%
BIOCARTA_STRESS_PATHWAY%MSIGDB_C2%BIOCARTA_STRESS_PATHWAY	BIOCARTA_STRESS_PATHWAY%MSIGDB_C2%BIOCARTA_STRESS_PATHWAY		23	-0.447134	-1.34244	0.0931373	0.187329	1	2198	tags=26%, list=14%, signal=30%
INSULIN RECEPTOR RECYCLING%REACTOME DATABASE ID RELEASE 57%77387	INSULIN RECEPTOR RECYCLING%REACTOME DATABASE ID RELEASE 57%77387		24	-0.44636	-1.34078	0.11509	0.1885	1	3831	tags=58%, list=24%, signal=77%
BIOCARTA_CARM_ER_PATHWAY%MSIGDB_C2%BIOCARTA_CARM_ER_PATHWAY	BIOCARTA_CARM_ER_PATHWAY%MSIGDB_C2%BIOCARTA_CARM_ER_PATHWAY		33	-0.415032	-1.34072	0.0928382	0.18799	1	2255	tags=27%, list=14%, signal=32%
PCP CE PATHWAY%REACTOME DATABASE ID RELEASE 57%4086400	PCP CE PATHWAY%REACTOME DATABASE ID RELEASE 57%4086400		78	-0.337374	-1.33965	0.055921	0.188679	1	2935	tags=36%, list=18%, signal=44%
LAGGING STRAND SYNTHESIS%REACTOME DATABASE ID RELEASE 57%69186	LAGGING STRAND SYNTHESIS%REACTOME DATABASE ID RELEASE 57%69186		18	-0.470743	-1.33914	0.119481	0.188728	1	3611	tags=56%, list=23%, signal=72%
PTK6 REGULATES RHO GTPASES, RAS GTPASE AND MAP KINASES%REACTOME DATABASE ID RELEASE 57%8849471	PTK6 REGULATES RHO GTPASES, RAS GTPASE AND MAP KINASES%REACTOME DATABASE ID RELEASE 57%8849471		24	-0.433939	-1.33501	0.09375	0.192744	1	2138	tags=33%, list=13%, signal=38%
BBSOME-MEDIATED CARGO-TARGETING TO CILIUM%REACTOME%R-HSA-5620922.1	BBSOME-MEDIATED CARGO-TARGETING TO CILIUM%REACTOME%R-HSA-5620922.1		20	-0.458291	-1.33464	0.108586	0.192665	1	3766	tags=50%, list=23%, signal=65%
BIOCARTA_P53_PATHWAY%MSIGDB_C2%BIOCARTA_P53_PATHWAY	BIOCARTA_P53_PATHWAY%MSIGDB_C2%BIOCARTA_P53_PATHWAY		15	-0.497229	-1.33439	0.121951	0.192395	1	1207	tags=33%, list=8%, signal=36%
DUAL INCISION IN GG-NER%REACTOME DATABASE ID RELEASE 57%5696400	DUAL INCISION IN GG-NER%REACTOME DATABASE ID RELEASE 57%5696400		33	-0.402027	-1.32892	0.115169	0.197953	1	3611	tags=45%, list=23%, signal=59%
SUMO E3 LIGASES SUMOYLATE TARGET PROTEINS%REACTOME%R-HSA-3108232.3	SUMO E3 LIGASES SUMOYLATE TARGET PROTEINS%REACTOME%R-HSA-3108232.3		78	-0.341854	-1.32407	0.0558824	0.202792	1	5068	tags=45%, list=32%, signal=65%
SELENOCYSTEINE SYNTHESIS%REACTOME%R-HSA-2408557.1	SELENOCYSTEINE SYNTHESIS%REACTOME%R-HSA-2408557.1		36	-0.398117	-1.3215	0.0951157	0.205084	1	3520	tags=47%, list=22%, signal=60%
IGF1 PATHWAY%PATHWAY INTERACTION DATABASE NCI-NATURE CURATED DATA%IGF1 PATHWAY	IGF1 PATHWAY%PATHWAY INTERACTION DATABASE NCI-NATURE CURATED DATA%IGF1 PATHWAY		27	-0.419605	-1.31928	0.0995146	0.207103	1	1835	tags=33%, list=11%, signal=38%
CD28 DEPENDENT PI3K AKT SIGNALING%REACTOME DATABASE ID RELEASE 57%389357	CD28 DEPENDENT PI3K AKT SIGNALING%REACTOME DATABASE ID RELEASE 57%389357		20	-0.448371	-1.31924	0.130221	0.206534	1	2732	tags=30%, list=17%, signal=36%
POST-CHAPERONIN TUBULIN FOLDING PATHWAY%REACTOME%R-HSA-389977.1	POST-CHAPERONIN TUBULIN FOLDING PATHWAY%REACTOME%R-HSA-389977.1		18	-0.470038	-1.31549	0.133333	0.210587	1	1330	tags=22%, list=8%, signal=24%
HDACS DEACETYLATE HISTONES%REACTOME%R-HSA-3214815.2	HDACS DEACETYLATE HISTONES%REACTOME%R-HSA-3214815.2		35	-0.392783	-1.31518	0.0928382	0.210291	1	337	tags=11%, list=2%, signal=12%
ENDOSOMAL SORTING COMPLEX REQUIRED FOR TRANSPORT (ESCRT)%REACTOME DATABASE ID RELEASE 57%917729	ENDOSOMAL SORTING COMPLEX REQUIRED FOR TRANSPORT (ESCRT)%REACTOME DATABASE ID RELEASE 57%917729		20	-0.452678	-1.31243	0.136709	0.212923	1	3947	tags=70%, list=25%, signal=93%
DNA REPLICATION%PANTHER PATHWAY%P00017	DNA REPLICATION%PANTHER PATHWAY%P00017		16	-0.478378	-1.30966	0.12766	0.215725	1	3482	tags=38%, list=22%, signal=48%
BIOCARTA_VEGF_PATHWAY%MSIGDB_C2%BIOCARTA_VEGF_PATHWAY	BIOCARTA_VEGF_PATHWAY%MSIGDB_C2%BIOCARTA_VEGF_PATHWAY		28	-0.419002	-1.30811	0.119363	0.217059	1	3653	tags=39%, list=23%, signal=51%
TRANSPORT OF THE SLBP DEPENDANT MATURE MRNA%REACTOME%R-HSA-159230.1	TRANSPORT OF THE SLBP DEPENDANT MATURE MRNA%REACTOME%R-HSA-159230.1		26	-0.407673	-1.29857	0.107579	0.228423	1	2343	tags=23%, list=15%, signal=27%
FORMATION OF TUBULIN FOLDING INTERMEDIATES BY CCT TRIC%REACTOME DATABASE ID RELEASE 57%389960	FORMATION OF TUBULIN FOLDING INTERMEDIATES BY CCT TRIC%REACTOME DATABASE ID RELEASE 57%389960		21	-0.439921	-1.29698	0.132316	0.229868	1	2923	tags=38%, list=18%, signal=47%
PID_IGF1_PATHWAY%MSIGDB_C2%PID_IGF1_PATHWAY	PID_IGF1_PATHWAY%MSIGDB_C2%PID_IGF1_PATHWAY		28	-0.408202	-1.29669	0.126866	0.229517	1	1835	tags=32%, list=11%, signal=36%
BIOCARTA_RAS_PATHWAY%MSIGDB_C2%BIOCARTA_RAS_PATHWAY	BIOCARTA_RAS_PATHWAY%MSIGDB_C2%BIOCARTA_RAS_PATHWAY		21	-0.432953	-1.29132	0.144279	0.23582	1	4685	tags=48%, list=29%, signal=67%
HALLMARK_REACTIVE_OXIGEN_SPECIES_PATHWAY%MSIGDB_C2%HALLMARK_REACTIVE_OXIGEN_SPECIES_PATHWAY	HALLMARK_REACTIVE_OXIGEN_SPECIES_PATHWAY%MSIGDB_C2%HALLMARK_REACTIVE_OXIGEN_SPECIES_PATHWAY		41	-0.36965	-1.2883	0.0986301	0.239105	1	1941	tags=29%, list=12%, signal=33%
PEPTIDE CHAIN ELONGATION%REACTOME%R-HSA-156902.1	PEPTIDE CHAIN ELONGATION%REACTOME%R-HSA-156902.1		32	-0.393616	-1.28582	0.0936639	0.241991	1	3578	tags=50%, list=22%, signal=64%
RAF-INDEPENDENT MAPK1 3 ACTIVATION%REACTOME%R-HSA-112409.1	RAF-INDEPENDENT MAPK1 3 ACTIVATION%REACTOME%R-HSA-112409.1		21	-0.428463	-1.28478	0.149746	0.242608	1	434	tags=14%, list=3%, signal=15%
MTOR SIGNALING PATHWAY%PATHWAY INTERACTION DATABASE NCI-NATURE CURATED DATA%MTOR SIGNALING PATHWAY	MTOR SIGNALING PATHWAY%PATHWAY INTERACTION DATABASE NCI-NATURE CURATED DATA%MTOR SIGNALING PATHWAY		60	-0.34686	-1.28394	0.0762463	0.243026	1	2946	tags=27%, list=18%, signal=33%
NEF-MEDIATES DOWN MODULATION OF CELL SURFACE RECEPTORS BY RECRUITING THEM TO CLATHRIN ADAPTERS%REACTOME%R-HSA-164938.1	NEF-MEDIATES DOWN MODULATION OF CELL SURFACE RECEPTORS BY RECRUITING THEM TO CLATHRIN ADAPTERS%REACTOME%R-HSA-164938.1		19	-0.438532	-1.28378	0.163462	0.242549	1	929	tags=26%, list=6%, signal=28%
CRMPS IN SEMA3A SIGNALING%REACTOME DATABASE ID RELEASE 57%399956	CRMPS IN SEMA3A SIGNALING%REACTOME DATABASE ID RELEASE 57%399956		16	-0.470013	-1.28185	0.133178	0.24429	1	2818	tags=38%, list=18%, signal=45%
PID_ATR_PATHWAY%MSIGDB_C2%PID_ATR_PATHWAY	PID_ATR_PATHWAY%MSIGDB_C2%PID_ATR_PATHWAY		37	-0.383879	-1.28079	0.0940171	0.244969	1	4890	tags=51%, list=30%, signal=74%
DISEASES OF SIGNAL TRANSDUCTION%REACTOME%R-HSA-5663202.3	DISEASES OF SIGNAL TRANSDUCTION%REACTOME%R-HSA-5663202.3		248	-0.273752	-1.28034	0.0163265	0.244868	1	2532	tags=23%, list=16%, signal=26%
E2F MEDIATED REGULATION OF DNA REPLICATION%REACTOME%R-HSA-113510.1	E2F MEDIATED REGULATION OF DNA REPLICATION%REACTOME%R-HSA-113510.1		28	-0.398731	-1.27577	0.15099	0.250498	1	4060	tags=54%, list=25%, signal=72%
SUMOYLATION OF DNA DAMAGE RESPONSE AND REPAIR PROTEINS%REACTOME DATABASE ID RELEASE 57%3108214	SUMOYLATION OF DNA DAMAGE RESPONSE AND REPAIR PROTEINS%REACTOME DATABASE ID RELEASE 57%3108214		58	-0.338653	-1.26891	0.0909091	0.25941	1	2233	tags=19%, list=14%, signal=22%
UNFOLDED PROTEIN RESPONSE (UPR)%REACTOME DATABASE ID RELEASE 57%381119	UNFOLDED PROTEIN RESPONSE (UPR)%REACTOME DATABASE ID RELEASE 57%381119		73	-0.33364	-1.26878	0.0922619	0.258835	1	1867	tags=19%, list=12%, signal=22%
CELLULAR RESPONSES TO STRESS%REACTOME%R-HSA-2262752.2	CELLULAR RESPONSES TO STRESS%REACTOME%R-HSA-2262752.2		284	-0.26945	-1.26448	0.0263158	0.264205	1	3024	tags=26%, list=19%, signal=32%
REGULATION OF TP53 ACTIVITY THROUGH ACETYLATION%REACTOME DATABASE ID RELEASE 57%6804758	REGULATION OF TP53 ACTIVITY THROUGH ACETYLATION%REACTOME DATABASE ID RELEASE 57%6804758		21	-0.427847	-1.26394	0.166667	0.2642	1	3222	tags=38%, list=20%, signal=48%
BETA-CATENIN PHOSPHORYLATION CASCADE%REACTOME%R-HSA-196299.1	BETA-CATENIN PHOSPHORYLATION CASCADE%REACTOME%R-HSA-196299.1		15	-0.463033	-1.26366	0.177034	0.263907	1	4354	tags=60%, list=27%, signal=82%
PID_TRAIL_PATHWAY%MSIGDB_C2%PID_TRAIL_PATHWAY	PID_TRAIL_PATHWAY%MSIGDB_C2%PID_TRAIL_PATHWAY		22	-0.423734	-1.26306	0.14742	0.263966	1	2198	tags=36%, list=14%, signal=42%
DETOXIFICATION OF REACTIVE OXYGEN SPECIES%REACTOME DATABASE ID RELEASE 57%3299685	DETOXIFICATION OF REACTIVE OXYGEN SPECIES%REACTOME DATABASE ID RELEASE 57%3299685		26	-0.397583	-1.26248	0.135897	0.264023	1	3468	tags=50%, list=22%, signal=64%
GOLGI-TO-ER RETROGRADE TRANSPORT%REACTOME DATABASE ID RELEASE 57%8856688	GOLGI-TO-ER RETROGRADE TRANSPORT%REACTOME DATABASE ID RELEASE 57%8856688		95	-0.3133	-1.26217	0.0786885	0.263745	1	4510	tags=41%, list=28%, signal=57%
TP53 REGULATES TRANSCRIPTION OF GENES INVOLVED IN CYTOCHROME C RELEASE%REACTOME DATABASE ID RELEASE 57%6803204	TP53 REGULATES TRANSCRIPTION OF GENES INVOLVED IN CYTOCHROME C RELEASE%REACTOME DATABASE ID RELEASE 57%6803204		16	-0.457203	-1.24882	0.190931	0.283151	1	1207	tags=25%, list=8%, signal=27%
BIOCARTA_MPR_PATHWAY%MSIGDB_C2%BIOCARTA_MPR_PATHWAY	BIOCARTA_MPR_PATHWAY%MSIGDB_C2%BIOCARTA_MPR_PATHWAY		29	-0.386824	-1.24805	0.139535	0.283482	1	2273	tags=28%, list=14%, signal=32%
CONSTITUTIVE SIGNALING BY AKT1 E17K IN CANCER%REACTOME%R-HSA-5674400.1	CONSTITUTIVE SIGNALING BY AKT1 E17K IN CANCER%REACTOME%R-HSA-5674400.1		23	-0.411656	-1.24779	0.18136	0.283162	1	3065	tags=35%, list=19%, signal=43%
PI3 KINASE PATHWAY%PANTHER PATHWAY%P00048	PI3 KINASE PATHWAY%PANTHER PATHWAY%P00048		41	-0.362448	-1.24764	0.133333	0.282565	1	2732	tags=29%, list=17%, signal=35%
DNA REPAIR%REACTOME DATABASE ID RELEASE 57%73894	DNA REPAIR%REACTOME DATABASE ID RELEASE 57%73894		245	-0.270933	-1.24555	0.0488889	0.284909	1	3734	tags=34%, list=23%, signal=44%
PID_MTOR_4PATHWAY%MSIGDB_C2%PID_MTOR_4PATHWAY	PID_MTOR_4PATHWAY%MSIGDB_C2%PID_MTOR_4PATHWAY		62	-0.325996	-1.24247	0.114286	0.288862	1	2946	tags=26%, list=18%, signal=31%
RECRUITMENT OF MITOTIC CENTROSOME PROTEINS AND COMPLEXES%REACTOME%R-HSA-380270.1	RECRUITMENT OF MITOTIC CENTROSOME PROTEINS AND COMPLEXES%REACTOME%R-HSA-380270.1		68	-0.31936	-1.24188	0.0914634	0.289064	1	2236	tags=25%, list=14%, signal=29%
BIOCARTA_BAD_PATHWAY%MSIGDB_C2%BIOCARTA_BAD_PATHWAY	BIOCARTA_BAD_PATHWAY%MSIGDB_C2%BIOCARTA_BAD_PATHWAY		23	-0.403145	-1.23756	0.17801	0.295107	1	3499	tags=43%, list=22%, signal=56%
CENTROSOME MATURATION%REACTOME%R-HSA-380287.1	CENTROSOME MATURATION%REACTOME%R-HSA-380287.1		68	-0.31936	-1.23643	0.107955	0.296112	1	2236	tags=25%, list=14%, signal=29%
AMINO ACID SYNTHESIS AND INTERCONVERSION (TRANSAMINATION)%REACTOME DATABASE ID RELEASE 57%70614	AMINO ACID SYNTHESIS AND INTERCONVERSION (TRANSAMINATION)%REACTOME DATABASE ID RELEASE 57%70614		18	-0.4378	-1.23541	0.184149	0.296808	1	2335	tags=28%, list=15%, signal=32%
SIGNALING EVENTS MEDIATED BY HDAC CLASS I%PATHWAY INTERACTION DATABASE NCI-NATURE CURATED DATA%SIGNALING EVENTS MEDIATED BY HDAC CLASS I	SIGNALING EVENTS MEDIATED BY HDAC CLASS I%PATHWAY INTERACTION DATABASE NCI-NATURE CURATED DATA%SIGNALING EVENTS MEDIATED BY HDAC CLASS I		60	-0.330598	-1.23385	0.141243	0.298564	1	2704	tags=23%, list=17%, signal=28%
BUDDING AND MATURATION OF HIV VIRION%REACTOME DATABASE ID RELEASE 57%162588	BUDDING AND MATURATION OF HIV VIRION%REACTOME DATABASE ID RELEASE 57%162588		16	-0.441056	-1.23262	0.188442	0.299738	1	3947	tags=63%, list=25%, signal=83%
INFLUENZA INFECTION%REACTOME%R-HSA-168254.1	INFLUENZA INFECTION%REACTOME%R-HSA-168254.1		85	-0.309177	-1.22891	0.107463	0.304888	1	3734	tags=34%, list=23%, signal=44%
SYNTHESIS OF VERY LONG-CHAIN FATTY ACYL-COAS%REACTOME DATABASE ID RELEASE 57%75876	SYNTHESIS OF VERY LONG-CHAIN FATTY ACYL-COAS%REACTOME DATABASE ID RELEASE 57%75876		24	-0.401094	-1.22696	0.169533	0.307097	1	805	tags=17%, list=5%, signal=18%
PID_HDAC_CLASSI_PATHWAY%MSIGDB_C2%PID_HDAC_CLASSI_PATHWAY	PID_HDAC_CLASSI_PATHWAY%MSIGDB_C2%PID_HDAC_CLASSI_PATHWAY		60	-0.323314	-1.22577	0.137931	0.30829	1	2704	tags=23%, list=17%, signal=28%
TRAIL SIGNALING PATHWAY%PATHWAY INTERACTION DATABASE NCI-NATURE CURATED DATA%TRAIL SIGNALING PATHWAY	TRAIL SIGNALING PATHWAY%PATHWAY INTERACTION DATABASE NCI-NATURE CURATED DATA%TRAIL SIGNALING PATHWAY		20	-0.419967	-1.22498	0.186398	0.308583	1	2795	tags=40%, list=17%, signal=48%
SIRT1 NEGATIVELY REGULATES RRNA EXPRESSION%REACTOME DATABASE ID RELEASE 57%427359	SIRT1 NEGATIVELY REGULATES RRNA EXPRESSION%REACTOME DATABASE ID RELEASE 57%427359		18	-0.427084	-1.22416	0.201439	0.309108	1	1280	tags=22%, list=8%, signal=24%
TRANSPORT TO THE GOLGI AND SUBSEQUENT MODIFICATION%REACTOME DATABASE ID RELEASE 57%948021	TRANSPORT TO THE GOLGI AND SUBSEQUENT MODIFICATION%REACTOME DATABASE ID RELEASE 57%948021		138	-0.281921	-1.22337	0.0596491	0.30952	1	3570	tags=32%, list=22%, signal=41%
NEGATIVE REGULATION OF MAPK PATHWAY%REACTOME DATABASE ID RELEASE 57%5675221	NEGATIVE REGULATION OF MAPK PATHWAY%REACTOME DATABASE ID RELEASE 57%5675221		34	-0.372918	-1.22264	0.156164	0.309834	1	1467	tags=21%, list=9%, signal=23%
TRISTETRAPROLIN (TTP, ZFP36) BINDS AND DESTABILIZES MRNA%REACTOME DATABASE ID RELEASE 57%450513	TRISTETRAPROLIN (TTP, ZFP36) BINDS AND DESTABILIZES MRNA%REACTOME DATABASE ID RELEASE 57%450513		16	-0.441968	-1.22174	0.221106	0.310512	1	1867	tags=25%, list=12%, signal=28%
REGULATION OF RETINOBLASTOMA PROTEIN%PATHWAY INTERACTION DATABASE NCI-NATURE CURATED DATA%REGULATION OF RETINOBLASTOMA PROTEIN	REGULATION OF RETINOBLASTOMA PROTEIN%PATHWAY INTERACTION DATABASE NCI-NATURE CURATED DATA%REGULATION OF RETINOBLASTOMA PROTEIN		56	-0.326877	-1.22135	0.131367	0.3103	1	3107	tags=25%, list=19%, signal=31%
SNRNP ASSEMBLY%REACTOME DATABASE ID RELEASE 57%191859	SNRNP ASSEMBLY%REACTOME DATABASE ID RELEASE 57%191859		37	-0.359964	-1.22081	0.181598	0.310279	1	2516	tags=27%, list=16%, signal=32%
CYCLIN D ASSOCIATED EVENTS IN G1%REACTOME%R-HSA-69231.2	CYCLIN D ASSOCIATED EVENTS IN G1%REACTOME%R-HSA-69231.2		29	-0.380336	-1.21877	0.168	0.312544	1	3107	tags=34%, list=19%, signal=43%
PID_EPHA_FWDPATHWAY%MSIGDB_C2%PID_EPHA_FWDPATHWAY	PID_EPHA_FWDPATHWAY%MSIGDB_C2%PID_EPHA_FWDPATHWAY		32	-0.365149	-1.21871	0.175532	0.311833	1	1937	tags=25%, list=12%, signal=28%
ST_TUMOR_NECROSIS_FACTOR_PATHWAY%MSIGDB_C2%ST_TUMOR_NECROSIS_FACTOR_PATHWAY	ST_TUMOR_NECROSIS_FACTOR_PATHWAY%MSIGDB_C2%ST_TUMOR_NECROSIS_FACTOR_PATHWAY		29	-0.373185	-1.21702	0.185279	0.313784	1	1985	tags=24%, list=12%, signal=27%
SUMOYLATION OF RNA BINDING PROTEINS%REACTOME%R-HSA-4570464.2	SUMOYLATION OF RNA BINDING PROTEINS%REACTOME%R-HSA-4570464.2		33	-0.371316	-1.21636	0.182741	0.314067	1	2430	tags=24%, list=15%, signal=29%
EPHA FORWARD SIGNALING%PATHWAY INTERACTION DATABASE NCI-NATURE CURATED DATA%EPHA FORWARD SIGNALING	EPHA FORWARD SIGNALING%PATHWAY INTERACTION DATABASE NCI-NATURE CURATED DATA%EPHA FORWARD SIGNALING		31	-0.368148	-1.2161	0.168901	0.313611	1	1937	tags=26%, list=12%, signal=29%
MTORC1-MEDIATED SIGNALLING%REACTOME DATABASE ID RELEASE 57%166208	MTORC1-MEDIATED SIGNALLING%REACTOME DATABASE ID RELEASE 57%166208		18	-0.430675	-1.21607	0.214854	0.312832	1	1068	tags=17%, list=7%, signal=18%
SIGNALING BY HEDGEHOG%REACTOME DATABASE ID RELEASE 57%5358351	SIGNALING BY HEDGEHOG%REACTOME DATABASE ID RELEASE 57%5358351		115	-0.287147	-1.21453	0.0805369	0.314586	1	2512	tags=25%, list=16%, signal=30%
PROCESSING OF CAPPED INTRONLESS PRE-MRNA%REACTOME%R-HSA-75067.1	PROCESSING OF CAPPED INTRONLESS PRE-MRNA%REACTOME%R-HSA-75067.1		21	-0.407245	-1.21397	0.206549	0.314665	1	3477	tags=62%, list=22%, signal=79%
AURKA ACTIVATION BY TPX2%REACTOME%R-HSA-8854518.1	AURKA ACTIVATION BY TPX2%REACTOME%R-HSA-8854518.1		65	-0.315531	-1.21279	0.148368	0.315751	1	3144	tags=31%, list=20%, signal=38%
POST-ELONGATION PROCESSING OF INTRONLESS PRE-MRNA%REACTOME DATABASE ID RELEASE 57%112297	POST-ELONGATION PROCESSING OF INTRONLESS PRE-MRNA%REACTOME DATABASE ID RELEASE 57%112297		21	-0.407245	-1.2081	0.211488	0.322634	1	3477	tags=62%, list=22%, signal=79%
HALLMARK_PI3K_AKT_MTOR_SIGNALING%MSIGDB_C2%HALLMARK_PI3K_AKT_MTOR_SIGNALING	HALLMARK_PI3K_AKT_MTOR_SIGNALING%MSIGDB_C2%HALLMARK_PI3K_AKT_MTOR_SIGNALING		100	-0.290296	-1.20751	0.102102	0.322774	1	3048	tags=27%, list=19%, signal=33%
BIOCARTA_GSK3_PATHWAY%MSIGDB_C2%BIOCARTA_GSK3_PATHWAY	BIOCARTA_GSK3_PATHWAY%MSIGDB_C2%BIOCARTA_GSK3_PATHWAY		27	-0.377738	-1.20728	0.18883	0.322365	1	1835	tags=26%, list=11%, signal=29%
PID_RB_1PATHWAY%MSIGDB_C2%PID_RB_1PATHWAY	PID_RB_1PATHWAY%MSIGDB_C2%PID_RB_1PATHWAY		56	-0.326877	-1.20568	0.15	0.324335	1	3107	tags=25%, list=19%, signal=31%
CELLULAR RESPONSE TO HYPOXIA%REACTOME%R-HSA-2262749.1	CELLULAR RESPONSE TO HYPOXIA%REACTOME%R-HSA-2262749.1		18	-0.418194	-1.2029	0.195238	0.328439	1	2334	tags=28%, list=15%, signal=32%
NON-CODING RNA METABOLISM%REACTOME DATABASE ID RELEASE 57%194441	NON-CODING RNA METABOLISM%REACTOME DATABASE ID RELEASE 57%194441		37	-0.359964	-1.20192	0.180412	0.329301	1	2516	tags=27%, list=16%, signal=32%
TP53 REGULATES TRANSCRIPTION OF CELL CYCLE GENES%REACTOME%R-HSA-6791312.2	TP53 REGULATES TRANSCRIPTION OF CELL CYCLE GENES%REACTOME%R-HSA-6791312.2		42	-0.341718	-1.20077	0.15	0.330525	1	2907	tags=33%, list=18%, signal=41%
REGULATION OF HYPOXIA-INDUCIBLE FACTOR (HIF) BY OXYGEN%REACTOME%R-HSA-1234174.1	REGULATION OF HYPOXIA-INDUCIBLE FACTOR (HIF) BY OXYGEN%REACTOME%R-HSA-1234174.1		18	-0.418194	-1.19775	0.228774	0.334957	1	2334	tags=28%, list=15%, signal=32%
SIGNALING BY WNT%REACTOME DATABASE ID RELEASE 57%195721	SIGNALING BY WNT%REACTOME DATABASE ID RELEASE 57%195721		255	-0.260013	-1.19743	0.0519481	0.334704	1	2530	tags=22%, list=16%, signal=25%
G1 PHASE%REACTOME%R-HSA-69236.1	G1 PHASE%REACTOME%R-HSA-69236.1		29	-0.380336	-1.19622	0.188442	0.336001	1	3107	tags=34%, list=19%, signal=43%
LYSOSOME VESICLE BIOGENESIS%REACTOME DATABASE ID RELEASE 57%432720	LYSOSOME VESICLE BIOGENESIS%REACTOME DATABASE ID RELEASE 57%432720		31	-0.360935	-1.19374	0.191549	0.339481	1	2287	tags=29%, list=14%, signal=34%
ASPARAGINE N-LINKED GLYCOSYLATION%REACTOME DATABASE ID RELEASE 57%446203	ASPARAGINE N-LINKED GLYCOSYLATION%REACTOME DATABASE ID RELEASE 57%446203		242	-0.257459	-1.19233	0.0504587	0.34106	1	2738	tags=24%, list=17%, signal=28%
SRP-DEPENDENT COTRANSLATIONAL PROTEIN TARGETING TO MEMBRANE%REACTOME DATABASE ID RELEASE 57%1799339	SRP-DEPENDENT COTRANSLATIONAL PROTEIN TARGETING TO MEMBRANE%REACTOME DATABASE ID RELEASE 57%1799339		52	-0.324865	-1.19211	0.168116	0.340584	1	3520	tags=40%, list=22%, signal=52%
ANCHORING OF THE BASAL BODY TO THE PLASMA MEMBRANE%REACTOME%R-HSA-5620912.1	ANCHORING OF THE BASAL BODY TO THE PLASMA MEMBRANE%REACTOME%R-HSA-5620912.1		88	-0.288221	-1.19182	0.157191	0.340227	1	2236	tags=22%, list=14%, signal=25%
PID_NFKAPPAB_ATYPICAL_PATHWAY%MSIGDB_C2%PID_NFKAPPAB_ATYPICAL_PATHWAY	PID_NFKAPPAB_ATYPICAL_PATHWAY%MSIGDB_C2%PID_NFKAPPAB_ATYPICAL_PATHWAY		16	-0.432041	-1.19163	0.228774	0.339734	1	247	tags=13%, list=2%, signal=13%
DOPAMINE NEUROTRANSMITTER RELEASE CYCLE%REACTOME DATABASE ID RELEASE 57%212676	DOPAMINE NEUROTRANSMITTER RELEASE CYCLE%REACTOME DATABASE ID RELEASE 57%212676		18	-0.416127	-1.19105	0.204225	0.339915	1	3527	tags=44%, list=22%, signal=57%
DOWNSTREAM SIGNALING EVENTS OF B CELL RECEPTOR (BCR)%REACTOME DATABASE ID RELEASE 57%1168372	DOWNSTREAM SIGNALING EVENTS OF B CELL RECEPTOR (BCR)%REACTOME DATABASE ID RELEASE 57%1168372		159	-0.272945	-1.19074	0.0833333	0.339622	1	2512	tags=26%, list=16%, signal=30%
IKK COMPLEX RECRUITMENT MEDIATED BY RIP1%REACTOME%R-HSA-937041.1	IKK COMPLEX RECRUITMENT MEDIATED BY RIP1%REACTOME%R-HSA-937041.1		18	-0.421156	-1.18725	0.216837	0.344708	1	2582	tags=39%, list=16%, signal=46%
S45 MUTANTS OF BETA-CATENIN AREN'T PHOSPHORYLATED%REACTOME%R-HSA-5358751.1	S45 MUTANTS OF BETA-CATENIN AREN'T PHOSPHORYLATED%REACTOME%R-HSA-5358751.1		15	-0.428227	-1.18472	0.246377	0.348269	1	4354	tags=53%, list=27%, signal=73%
THE CANONICAL RETINOID CYCLE IN RODS (TWILIGHT VISION)%REACTOME%R-HSA-2453902.2	THE CANONICAL RETINOID CYCLE IN RODS (TWILIGHT VISION)%REACTOME%R-HSA-2453902.2		22	-0.387552	-1.18455	0.218579	0.347712	1	300	tags=14%, list=2%, signal=14%
ACTIVATION OF HOX GENES DURING DIFFERENTIATION%REACTOME%R-HSA-5619507.1	ACTIVATION OF HOX GENES DURING DIFFERENTIATION%REACTOME%R-HSA-5619507.1		70	-0.308339	-1.18058	0.168675	0.353875	1	3781	tags=33%, list=24%, signal=43%
VIRAL MRNA TRANSLATION%REACTOME%R-HSA-192823.1	VIRAL MRNA TRANSLATION%REACTOME%R-HSA-192823.1		33	-0.359793	-1.17509	0.193461	0.362862	1	3520	tags=45%, list=22%, signal=58%
ACTIVATION OF ANTERIOR HOX GENES IN HINDBRAIN DEVELOPMENT DURING EARLY EMBRYOGENESIS%REACTOME%R-HSA-5617472.1	ACTIVATION OF ANTERIOR HOX GENES IN HINDBRAIN DEVELOPMENT DURING EARLY EMBRYOGENESIS%REACTOME%R-HSA-5617472.1		70	-0.308339	-1.17387	0.167665	0.364167	1	3781	tags=33%, list=24%, signal=43%
INTRA-GOLGI AND RETROGRADE GOLGI-TO-ER TRAFFIC%REACTOME%R-HSA-6811442.1	INTRA-GOLGI AND RETROGRADE GOLGI-TO-ER TRAFFIC%REACTOME%R-HSA-6811442.1		154	-0.27152	-1.17352	0.138298	0.363905	1	4427	tags=36%, list=28%, signal=50%
AMINO ACID TRANSPORT ACROSS THE PLASMA MEMBRANE%REACTOME DATABASE ID RELEASE 57%352230	AMINO ACID TRANSPORT ACROSS THE PLASMA MEMBRANE%REACTOME DATABASE ID RELEASE 57%352230		28	-0.375658	-1.17265	0.214286	0.36477	1	3437	tags=36%, list=21%, signal=45%
S33 MUTANTS OF BETA-CATENIN AREN'T PHOSPHORYLATED%REACTOME%R-HSA-5358747.1	S33 MUTANTS OF BETA-CATENIN AREN'T PHOSPHORYLATED%REACTOME%R-HSA-5358747.1		15	-0.428227	-1.17256	0.259259	0.36403	1	4354	tags=53%, list=27%, signal=73%
PID_NFAT_3PATHWAY%MSIGDB_C2%PID_NFAT_3PATHWAY	PID_NFAT_3PATHWAY%MSIGDB_C2%PID_NFAT_3PATHWAY		48	-0.32862	-1.17151	0.191489	0.364969	1	2255	tags=23%, list=14%, signal=27%
PHOSPHORYLATION SITE MUTANTS OF CTNNB1 ARE NOT TARGETED TO THE PROTEASOME BY THE DESTRUCTION COMPLEX%REACTOME%R-HSA-4839743.1	PHOSPHORYLATION SITE MUTANTS OF CTNNB1 ARE NOT TARGETED TO THE PROTEASOME BY THE DESTRUCTION COMPLEX%REACTOME%R-HSA-4839743.1		15	-0.428227	-1.17023	0.252451	0.366453	1	4354	tags=53%, list=27%, signal=73%
T41 MUTANTS OF BETA-CATENIN AREN'T PHOSPHORYLATED%REACTOME%R-HSA-5358752.1	T41 MUTANTS OF BETA-CATENIN AREN'T PHOSPHORYLATED%REACTOME%R-HSA-5358752.1		15	-0.428227	-1.16747	0.267773	0.370389	1	4354	tags=53%, list=27%, signal=73%
BIOCARTA_CSK_PATHWAY%MSIGDB_C2%BIOCARTA_CSK_PATHWAY	BIOCARTA_CSK_PATHWAY%MSIGDB_C2%BIOCARTA_CSK_PATHWAY		18	-0.402756	-1.16475	0.247525	0.374542	1	2672	tags=28%, list=17%, signal=33%
BIOCARTA_WNT_PATHWAY%MSIGDB_C2%BIOCARTA_WNT_PATHWAY	BIOCARTA_WNT_PATHWAY%MSIGDB_C2%BIOCARTA_WNT_PATHWAY		23	-0.387068	-1.16411	0.265151	0.374886	1	2255	tags=30%, list=14%, signal=35%
DEGRADATION OF BETA CATENIN%PATHWAY INTERACTION DATABASE NCI-NATURE CURATED DATA%DEGRADATION OF BETA CATENIN	DEGRADATION OF BETA CATENIN%PATHWAY INTERACTION DATABASE NCI-NATURE CURATED DATA%DEGRADATION OF BETA CATENIN		17	-0.408693	-1.16335	0.251765	0.37547	1	2377	tags=35%, list=15%, signal=41%
BIOCARTA_CELLCYCLE_PATHWAY%MSIGDB_C2%BIOCARTA_CELLCYCLE_PATHWAY	BIOCARTA_CELLCYCLE_PATHWAY%MSIGDB_C2%BIOCARTA_CELLCYCLE_PATHWAY		19	-0.391436	-1.16127	0.228155	0.378644	1	2865	tags=37%, list=18%, signal=45%
REGULATION OF HSF1-MEDIATED HEAT SHOCK RESPONSE%REACTOME DATABASE ID RELEASE 57%3371453	REGULATION OF HSF1-MEDIATED HEAT SHOCK RESPONSE%REACTOME DATABASE ID RELEASE 57%3371453		54	-0.319405	-1.16064	0.205438	0.37901	1	2167	tags=20%, list=14%, signal=23%
S37 MUTANTS OF BETA-CATENIN AREN'T PHOSPHORYLATED%REACTOME DATABASE ID RELEASE 57%5358749	S37 MUTANTS OF BETA-CATENIN AREN'T PHOSPHORYLATED%REACTOME DATABASE ID RELEASE 57%5358749		15	-0.428227	-1.16056	0.277778	0.378232	1	4354	tags=53%, list=27%, signal=73%
3-PHOSPHOINOSITIDE DEGRADATION%HUMANCYC%PWY-6368	3-PHOSPHOINOSITIDE DEGRADATION%HUMANCYC%PWY-6368		18	-0.40421	-1.15752	0.276119	0.383232	1	2835	tags=44%, list=18%, signal=54%
HDR THROUGH HOMOLOGOUS RECOMBINATION (HR) OR SINGLE STRAND ANNEALING (SSA)%REACTOME%R-HSA-5693567.1	HDR THROUGH HOMOLOGOUS RECOMBINATION (HR) OR SINGLE STRAND ANNEALING (SSA)%REACTOME%R-HSA-5693567.1		84	-0.291451	-1.15585	0.213855	0.385586	1	3693	tags=32%, list=23%, signal=42%
REGULATION OF PLK1 ACTIVITY AT G2 M TRANSITION%REACTOME%R-HSA-2565942.1	REGULATION OF PLK1 ACTIVITY AT G2 M TRANSITION%REACTOME%R-HSA-2565942.1		74	-0.296498	-1.15511	0.185759	0.386164	1	3144	tags=31%, list=20%, signal=38%
PKB-MEDIATED EVENTS%REACTOME DATABASE ID RELEASE 57%109703	PKB-MEDIATED EVENTS%REACTOME DATABASE ID RELEASE 57%109703		36	-0.3446	-1.15158	0.242507	0.391953	1	4326	tags=42%, list=27%, signal=57%
RESOLUTION OF AP SITES VIA THE MULTIPLE-NUCLEOTIDE PATCH REPLACEMENT PATHWAY%REACTOME DATABASE ID RELEASE 57%110373	RESOLUTION OF AP SITES VIA THE MULTIPLE-NUCLEOTIDE PATCH REPLACEMENT PATHWAY%REACTOME DATABASE ID RELEASE 57%110373		22	-0.382353	-1.15143	0.244019	0.391408	1	4909	tags=73%, list=31%, signal=105%
TNFALPHA%IOB%TNFALPHA	TNFALPHA%IOB%TNFALPHA		190	-0.253798	-1.15107	0.101626	0.3911	1	3161	tags=28%, list=20%, signal=35%
COPI-MEDIATED ANTEROGRADE TRANSPORT%REACTOME DATABASE ID RELEASE 57%6807878	COPI-MEDIATED ANTEROGRADE TRANSPORT%REACTOME DATABASE ID RELEASE 57%6807878		62	-0.304217	-1.1501	0.216901	0.392103	1	3570	tags=31%, list=22%, signal=39%
MACROAUTOPHAGY%REACTOME DATABASE ID RELEASE 57%1632852	MACROAUTOPHAGY%REACTOME DATABASE ID RELEASE 57%1632852		55	-0.312262	-1.14907	0.194667	0.393182	1	3295	tags=31%, list=21%, signal=39%
SYNTHESIS OF SUBSTRATES IN N-GLYCAN BIOSYTHESIS%REACTOME DATABASE ID RELEASE 57%446219	SYNTHESIS OF SUBSTRATES IN N-GLYCAN BIOSYTHESIS%REACTOME DATABASE ID RELEASE 57%446219		59	-0.309676	-1.14661	0.196262	0.397009	1	2550	tags=31%, list=16%, signal=36%
P53 PATHWAY%PATHWAY INTERACTION DATABASE NCI-NATURE CURATED DATA%P53 PATHWAY	P53 PATHWAY%PATHWAY INTERACTION DATABASE NCI-NATURE CURATED DATA%P53 PATHWAY		51	-0.311034	-1.14505	0.21229	0.399143	1	3305	tags=31%, list=21%, signal=39%
ASSEMBLY OF THE PRIMARY CILIUM%REACTOME%R-HSA-5617833.2	ASSEMBLY OF THE PRIMARY CILIUM%REACTOME%R-HSA-5617833.2		167	-0.256349	-1.14458	0.139442	0.399075	1	3023	tags=25%, list=19%, signal=30%
BIOCARTA_CD40_PATHWAY%MSIGDB_C2%BIOCARTA_CD40_PATHWAY	BIOCARTA_CD40_PATHWAY%MSIGDB_C2%BIOCARTA_CD40_PATHWAY		15	-0.417777	-1.14451	0.278607	0.398299	1	3633	tags=47%, list=23%, signal=60%
HATS ACETYLATE HISTONES%REACTOME%R-HSA-3214847.1	HATS ACETYLATE HISTONES%REACTOME%R-HSA-3214847.1		76	-0.293872	-1.14349	0.214067	0.399339	1	4110	tags=36%, list=26%, signal=48%
PCNA-DEPENDENT LONG PATCH BASE EXCISION REPAIR%REACTOME DATABASE ID RELEASE 57%5651801	PCNA-DEPENDENT LONG PATCH BASE EXCISION REPAIR%REACTOME DATABASE ID RELEASE 57%5651801		19	-0.397776	-1.14335	0.269923	0.398692	1	3611	tags=58%, list=23%, signal=75%
GAP JUNCTION ASSEMBLY%REACTOME DATABASE ID RELEASE 57%190861	GAP JUNCTION ASSEMBLY%REACTOME DATABASE ID RELEASE 57%190861		17	-0.41165	-1.14329	0.276923	0.397884	1	101	tags=6%, list=1%, signal=6%
CHAPERONIN-MEDIATED PROTEIN FOLDING%REACTOME%R-HSA-390466.3	CHAPERONIN-MEDIATED PROTEIN FOLDING%REACTOME%R-HSA-390466.3		87	-0.280261	-1.14264	0.181556	0.398296	1	3674	tags=39%, list=23%, signal=50%
ASSOCIATION OF TRIC CCT WITH TARGET PROTEINS DURING BIOSYNTHESIS%REACTOME DATABASE ID RELEASE 57%390471	ASSOCIATION OF TRIC CCT WITH TARGET PROTEINS DURING BIOSYNTHESIS%REACTOME DATABASE ID RELEASE 57%390471		36	-0.343186	-1.14142	0.268698	0.399691	1	3525	tags=53%, list=22%, signal=67%
REGULATION OF P38-ALPHA AND P38-BETA%PATHWAY INTERACTION DATABASE NCI-NATURE CURATED DATA%REGULATION OF P38-ALPHA AND P38-BETA	REGULATION OF P38-ALPHA AND P38-BETA%PATHWAY INTERACTION DATABASE NCI-NATURE CURATED DATA%REGULATION OF P38-ALPHA AND P38-BETA		28	-0.355772	-1.14015	0.255528	0.401359	1	247	tags=11%, list=2%, signal=11%
SIGNALING BY NOTCH1 IN CANCER%REACTOME%R-HSA-2644603.2	SIGNALING BY NOTCH1 IN CANCER%REACTOME%R-HSA-2644603.2		46	-0.316346	-1.13814	0.248634	0.404391	1	3131	tags=30%, list=20%, signal=38%
NEUROTROPHIC FACTOR-MEDIATED TRK RECEPTOR SIGNALING%PATHWAY INTERACTION DATABASE NCI-NATURE CURATED DATA%NEUROTROPHIC FACTOR-MEDIATED TRK RECEPTOR SIGNALING	NEUROTROPHIC FACTOR-MEDIATED TRK RECEPTOR SIGNALING%PATHWAY INTERACTION DATABASE NCI-NATURE CURATED DATA%NEUROTROPHIC FACTOR-MEDIATED TRK RECEPTOR SIGNALING		56	-0.304023	-1.13709	0.209091	0.405608	1	2574	tags=25%, list=16%, signal=30%
HALLMARK_GLYCOLYSIS%MSIGDB_C2%HALLMARK_GLYCOLYSIS	HALLMARK_GLYCOLYSIS%MSIGDB_C2%HALLMARK_GLYCOLYSIS		182	-0.252799	-1.13624	0.136929	0.406415	1	2655	tags=27%, list=17%, signal=32%
PROCESSING OF DNA DOUBLE-STRAND BREAK ENDS%REACTOME%R-HSA-5693607.1	PROCESSING OF DNA DOUBLE-STRAND BREAK ENDS%REACTOME%R-HSA-5693607.1		56	-0.301139	-1.13594	0.228412	0.406048	1	2233	tags=23%, list=14%, signal=27%
PID_PS1_PATHWAY%MSIGDB_C2%PID_PS1_PATHWAY	PID_PS1_PATHWAY%MSIGDB_C2%PID_PS1_PATHWAY		40	-0.324327	-1.13017	0.265252	0.416803	1	2255	tags=23%, list=14%, signal=26%
CERAMIDE SIGNALING PATHWAY%PATHWAY INTERACTION DATABASE NCI-NATURE CURATED DATA%CERAMIDE SIGNALING PATHWAY	CERAMIDE SIGNALING PATHWAY%PATHWAY INTERACTION DATABASE NCI-NATURE CURATED DATA%CERAMIDE SIGNALING PATHWAY		41	-0.323696	-1.12978	0.232687	0.416632	1	2003	tags=27%, list=12%, signal=31%
TRK RECEPTOR SIGNALING MEDIATED BY PI3K AND PLC-GAMMA%PATHWAY INTERACTION DATABASE NCI-NATURE CURATED DATA%TRK RECEPTOR SIGNALING MEDIATED BY PI3K AND PLC-GAMMA	TRK RECEPTOR SIGNALING MEDIATED BY PI3K AND PLC-GAMMA%PATHWAY INTERACTION DATABASE NCI-NATURE CURATED DATA%TRK RECEPTOR SIGNALING MEDIATED BY PI3K AND PLC-GAMMA		34	-0.337195	-1.12965	0.243455	0.415902	1	1835	tags=24%, list=11%, signal=27%
PRESENILIN ACTION IN NOTCH AND WNT SIGNALING%PATHWAY INTERACTION DATABASE NCI-NATURE CURATED DATA%PRESENILIN ACTION IN NOTCH AND WNT SIGNALING	PRESENILIN ACTION IN NOTCH AND WNT SIGNALING%PATHWAY INTERACTION DATABASE NCI-NATURE CURATED DATA%PRESENILIN ACTION IN NOTCH AND WNT SIGNALING		40	-0.332987	-1.12908	0.248705	0.415959	1	2255	tags=23%, list=14%, signal=26%
SIG_PIP3_SIGNALING_IN_CARDIAC_MYOCTES%MSIGDB_C2%SIG_PIP3_SIGNALING_IN_CARDIAC_MYOCTES	SIG_PIP3_SIGNALING_IN_CARDIAC_MYOCTES%MSIGDB_C2%SIG_PIP3_SIGNALING_IN_CARDIAC_MYOCTES		60	-0.299249	-1.12572	0.216667	0.421575	1	1157	tags=15%, list=7%, signal=16%
TNFALPHA%NETPATH%TNFALPHA	TNFALPHA%NETPATH%TNFALPHA		242	-0.24329	-1.12536	0.140496	0.421303	1	3161	tags=29%, list=20%, signal=35%
SIGNALING BY NOTCH1 HD+PEST DOMAIN MUTANTS IN CANCER%REACTOME%R-HSA-2894858.1	SIGNALING BY NOTCH1 HD+PEST DOMAIN MUTANTS IN CANCER%REACTOME%R-HSA-2894858.1		46	-0.316346	-1.1236	0.24	0.423837	1	3131	tags=30%, list=20%, signal=38%
MTOR SIGNALLING%REACTOME DATABASE ID RELEASE 57%165159	MTOR SIGNALLING%REACTOME DATABASE ID RELEASE 57%165159		35	-0.332266	-1.12356	0.260116	0.422994	1	4326	tags=40%, list=27%, signal=55%
WNT SIGNALING NETWORK%PATHWAY INTERACTION DATABASE NCI-NATURE CURATED DATA%WNT SIGNALING NETWORK	WNT SIGNALING NETWORK%PATHWAY INTERACTION DATABASE NCI-NATURE CURATED DATA%WNT SIGNALING NETWORK		28	-0.349789	-1.12008	0.281095	0.428963	1	1683	tags=25%, list=10%, signal=28%
PID_WNT_SIGNALING_PATHWAY%MSIGDB_C2%PID_WNT_SIGNALING_PATHWAY	PID_WNT_SIGNALING_PATHWAY%MSIGDB_C2%PID_WNT_SIGNALING_PATHWAY		28	-0.349789	-1.11942	0.293151	0.429317	1	1683	tags=25%, list=10%, signal=28%
PROCESSING OF INTRONLESS PRE-MRNAS%REACTOME DATABASE ID RELEASE 57%77595	PROCESSING OF INTRONLESS PRE-MRNAS%REACTOME DATABASE ID RELEASE 57%77595		15	-0.419592	-1.11806	0.290398	0.430997	1	3477	tags=60%, list=22%, signal=77%
PID_P53_REGULATION_PATHWAY%MSIGDB_C2%PID_P53_REGULATION_PATHWAY	PID_P53_REGULATION_PATHWAY%MSIGDB_C2%PID_P53_REGULATION_PATHWAY		51	-0.311035	-1.1169	0.252033	0.432457	1	3305	tags=31%, list=21%, signal=39%
BIOCARTA_CHREBP2_PATHWAY%MSIGDB_C2%BIOCARTA_CHREBP2_PATHWAY	BIOCARTA_CHREBP2_PATHWAY%MSIGDB_C2%BIOCARTA_CHREBP2_PATHWAY		39	-0.326145	-1.11629	0.285714	0.432672	1	4748	tags=46%, list=30%, signal=65%
TRAIL%IOB%TRAIL	TRAIL%IOB%TRAIL		48	-0.312862	-1.11534	0.26158	0.43366	1	2076	tags=23%, list=13%, signal=26%
IRON UPTAKE AND TRANSPORT%REACTOME%R-HSA-917937.1	IRON UPTAKE AND TRANSPORT%REACTOME%R-HSA-917937.1		36	-0.335108	-1.11507	0.291139	0.433248	1	2787	tags=39%, list=17%, signal=47%
CONSTITUTIVE SIGNALING BY NOTCH1 HD+PEST DOMAIN MUTANTS%REACTOME%R-HSA-2894862.1	CONSTITUTIVE SIGNALING BY NOTCH1 HD+PEST DOMAIN MUTANTS%REACTOME%R-HSA-2894862.1		46	-0.316346	-1.11464	0.274611	0.433213	1	3131	tags=30%, list=20%, signal=38%
CYTOSOLIC SENSORS OF PATHOGEN-ASSOCIATED DNA%REACTOME%R-HSA-1834949.1	CYTOSOLIC SENSORS OF PATHOGEN-ASSOCIATED DNA%REACTOME%R-HSA-1834949.1		54	-0.295454	-1.11451	0.255072	0.432492	1	2426	tags=31%, list=15%, signal=37%
OXIDATIVE STRESS RESPONSE%PANTHER PATHWAY%P00046	OXIDATIVE STRESS RESPONSE%PANTHER PATHWAY%P00046		41	-0.319872	-1.11424	0.259669	0.432055	1	434	tags=12%, list=3%, signal=13%
CONSTITUTIVE SIGNALING BY NOTCH1 PEST DOMAIN MUTANTS%REACTOME DATABASE ID RELEASE 57%2644606	CONSTITUTIVE SIGNALING BY NOTCH1 PEST DOMAIN MUTANTS%REACTOME DATABASE ID RELEASE 57%2644606		46	-0.316346	-1.11401	0.241935	0.431541	1	3131	tags=30%, list=20%, signal=38%
SIGNALING BY NOTCH1 PEST DOMAIN MUTANTS IN CANCER%REACTOME DATABASE ID RELEASE 57%2644602	SIGNALING BY NOTCH1 PEST DOMAIN MUTANTS IN CANCER%REACTOME DATABASE ID RELEASE 57%2644602		46	-0.316346	-1.11372	0.240437	0.431265	1	3131	tags=30%, list=20%, signal=38%
SIGNALING BY FGFR2 IIIA TM%REACTOME%R-HSA-8851708.1	SIGNALING BY FGFR2 IIIA TM%REACTOME%R-HSA-8851708.1		18	-0.383156	-1.11256	0.287736	0.432678	1	3734	tags=50%, list=23%, signal=65%
PID_PI3K_PLC_TRK_PATHWAY%MSIGDB_C2%PID_PI3K_PLC_TRK_PATHWAY	PID_PI3K_PLC_TRK_PATHWAY%MSIGDB_C2%PID_PI3K_PLC_TRK_PATHWAY		34	-0.337195	-1.11099	0.286089	0.434879	1	1835	tags=24%, list=11%, signal=27%
NONSENSE MEDIATED DECAY (NMD) INDEPENDENT OF THE EXON JUNCTION COMPLEX (EJC)%REACTOME%R-HSA-975956.1	NONSENSE MEDIATED DECAY (NMD) INDEPENDENT OF THE EXON JUNCTION COMPLEX (EJC)%REACTOME%R-HSA-975956.1		39	-0.328712	-1.11014	0.270408	0.435738	1	3520	tags=41%, list=22%, signal=52%
ADRENALINE AND NORADRENALINE BIOSYNTHESIS%PANTHER PATHWAY%P00001	ADRENALINE AND NORADRENALINE BIOSYNTHESIS%PANTHER PATHWAY%P00001		23	-0.362356	-1.10781	0.3	0.439654	1	3506	tags=39%, list=22%, signal=50%
SIGNALING EVENTS MEDIATED BY PRL%PATHWAY INTERACTION DATABASE NCI-NATURE CURATED DATA%SIGNALING EVENTS MEDIATED BY PRL	SIGNALING EVENTS MEDIATED BY PRL%PATHWAY INTERACTION DATABASE NCI-NATURE CURATED DATA%SIGNALING EVENTS MEDIATED BY PRL		21	-0.373498	-1.10778	0.317136	0.438753	1	2507	tags=33%, list=16%, signal=39%
PROTEIN FOLDING%REACTOME%R-HSA-391251.1	PROTEIN FOLDING%REACTOME%R-HSA-391251.1		92	-0.275696	-1.10686	0.237785	0.439642	1	3674	tags=38%, list=23%, signal=49%
TRANSCRIPTIONAL REGULATION OF PLURIPOTENT STEM CELLS%REACTOME DATABASE ID RELEASE 57%452723	TRANSCRIPTIONAL REGULATION OF PLURIPOTENT STEM CELLS%REACTOME DATABASE ID RELEASE 57%452723		29	-0.341645	-1.09961	0.316623	0.453662	1	1251	tags=14%, list=8%, signal=15%
VPR-MEDIATED NUCLEAR IMPORT OF PICS%REACTOME%R-HSA-180910.1	VPR-MEDIATED NUCLEAR IMPORT OF PICS%REACTOME%R-HSA-180910.1		24	-0.366579	-1.09941	0.300254	0.453144	1	2290	tags=21%, list=14%, signal=24%
BIOCARTA_ERK5_PATHWAY%MSIGDB_C2%BIOCARTA_ERK5_PATHWAY	BIOCARTA_ERK5_PATHWAY%MSIGDB_C2%BIOCARTA_ERK5_PATHWAY		17	-0.398641	-1.09857	0.316629	0.453913	1	4578	tags=47%, list=29%, signal=66%
PID_BETA_CATENIN_DEG_PATHWAY%MSIGDB_C2%PID_BETA_CATENIN_DEG_PATHWAY	PID_BETA_CATENIN_DEG_PATHWAY%MSIGDB_C2%PID_BETA_CATENIN_DEG_PATHWAY		17	-0.384585	-1.09708	0.317136	0.456045	1	2377	tags=35%, list=15%, signal=41%
CANONICAL WNT SIGNALING PATHWAY%PATHWAY INTERACTION DATABASE NCI-NATURE CURATED DATA%CANONICAL WNT SIGNALING PATHWAY	CANONICAL WNT SIGNALING PATHWAY%PATHWAY INTERACTION DATABASE NCI-NATURE CURATED DATA%CANONICAL WNT SIGNALING PATHWAY		19	-0.375216	-1.09485	0.354592	0.459889	1	1568	tags=26%, list=10%, signal=29%
LOSS OF NLP FROM MITOTIC CENTROSOMES%REACTOME%R-HSA-380259.1	LOSS OF NLP FROM MITOTIC CENTROSOMES%REACTOME%R-HSA-380259.1		62	-0.292454	-1.09348	0.28882	0.461931	1	3144	tags=29%, list=20%, signal=36%
MHC CLASS II ANTIGEN PRESENTATION%REACTOME DATABASE ID RELEASE 57%2132295	MHC CLASS II ANTIGEN PRESENTATION%REACTOME DATABASE ID RELEASE 57%2132295		85	-0.275177	-1.0929	0.266667	0.462222	1	4243	tags=38%, list=26%, signal=51%
LOSS OF PROTEINS REQUIRED FOR INTERPHASE MICROTUBULE ORGANIZATIONÂ FROM THE CENTROSOME%REACTOME%R-HSA-380284.1	LOSS OF PROTEINS REQUIRED FOR INTERPHASE MICROTUBULE ORGANIZATIONÂ FROM THE CENTROSOME%REACTOME%R-HSA-380284.1		62	-0.292454	-1.09283	0.273016	0.461372	1	3144	tags=29%, list=20%, signal=36%
TRANSPORT OF THE SLBP INDEPENDENT MATURE MRNA%REACTOME%R-HSA-159227.1	TRANSPORT OF THE SLBP INDEPENDENT MATURE MRNA%REACTOME%R-HSA-159227.1		25	-0.355118	-1.09276	0.336	0.460524	1	2343	tags=20%, list=15%, signal=23%
THE ROLE OF NEF IN HIV-1 REPLICATION AND DISEASE PATHOGENESIS%REACTOME%R-HSA-164952.1	THE ROLE OF NEF IN HIV-1 REPLICATION AND DISEASE PATHOGENESIS%REACTOME%R-HSA-164952.1		25	-0.35305	-1.09178	0.307506	0.461568	1	929	tags=20%, list=6%, signal=21%
ACTIVATION OF BH3-ONLY PROTEINS%REACTOME DATABASE ID RELEASE 57%114452	ACTIVATION OF BH3-ONLY PROTEINS%REACTOME DATABASE ID RELEASE 57%114452		23	-0.35602	-1.09089	0.352941	0.462472	1	1207	tags=17%, list=8%, signal=19%
B CELL ACTIVATION%REACTOME%R-HSA-983705.1	B CELL ACTIVATION%REACTOME%R-HSA-983705.1		186	-0.24021	-1.08955	0.227642	0.464465	1	2512	tags=23%, list=16%, signal=27%
PID_PRL_SIGNALING_EVENTS_PATHWAY%MSIGDB_C2%PID_PRL_SIGNALING_EVENTS_PATHWAY	PID_PRL_SIGNALING_EVENTS_PATHWAY%MSIGDB_C2%PID_PRL_SIGNALING_EVENTS_PATHWAY		21	-0.373498	-1.088	0.328283	0.467037	1	2507	tags=33%, list=16%, signal=39%
MITOCHONDRIAL FATTY ACID BETA-OXIDATION%REACTOME%R-HSA-77289.2	MITOCHONDRIAL FATTY ACID BETA-OXIDATION%REACTOME%R-HSA-77289.2		16	-0.388572	-1.08272	0.355972	0.477583	1	3443	tags=38%, list=21%, signal=48%
PID_WNT_CANONICAL_PATHWAY%MSIGDB_C2%PID_WNT_CANONICAL_PATHWAY	PID_WNT_CANONICAL_PATHWAY%MSIGDB_C2%PID_WNT_CANONICAL_PATHWAY		19	-0.375216	-1.08266	0.35	0.476712	1	1568	tags=26%, list=10%, signal=29%
HALLMARK_G2M_CHECKPOINT%MSIGDB_C2%HALLMARK_G2M_CHECKPOINT	HALLMARK_G2M_CHECKPOINT%MSIGDB_C2%HALLMARK_G2M_CHECKPOINT		181	-0.243556	-1.08211	0.237226	0.476966	1	4270	tags=33%, list=27%, signal=45%
PID_ECADHERIN_NASCENT_AJ_PATHWAY%MSIGDB_C2%PID_ECADHERIN_NASCENT_AJ_PATHWAY	PID_ECADHERIN_NASCENT_AJ_PATHWAY%MSIGDB_C2%PID_ECADHERIN_NASCENT_AJ_PATHWAY		33	-0.32704	-1.07404	0.335784	0.49394	1	754	tags=12%, list=5%, signal=13%
PID_TRKR_PATHWAY%MSIGDB_C2%PID_TRKR_PATHWAY	PID_TRKR_PATHWAY%MSIGDB_C2%PID_TRKR_PATHWAY		58	-0.292035	-1.07359	0.319403	0.493936	1	2574	tags=24%, list=16%, signal=29%
MEIOTIC RECOMBINATION%REACTOME DATABASE ID RELEASE 57%912446	MEIOTIC RECOMBINATION%REACTOME DATABASE ID RELEASE 57%912446		35	-0.319185	-1.07316	0.319307	0.493828	1	1891	tags=20%, list=12%, signal=23%
PID_P38_ALPHA_BETA_PATHWAY%MSIGDB_C2%PID_P38_ALPHA_BETA_PATHWAY	PID_P38_ALPHA_BETA_PATHWAY%MSIGDB_C2%PID_P38_ALPHA_BETA_PATHWAY		29	-0.328254	-1.0728	0.335038	0.493628	1	247	tags=10%, list=2%, signal=10%
ROLE OF CALCINEURIN-DEPENDENT NFAT SIGNALING IN LYMPHOCYTES%PATHWAY INTERACTION DATABASE NCI-NATURE CURATED DATA%ROLE OF CALCINEURIN-DEPENDENT NFAT SIGNALING IN LYMPHOCYTES	ROLE OF CALCINEURIN-DEPENDENT NFAT SIGNALING IN LYMPHOCYTES%PATHWAY INTERACTION DATABASE NCI-NATURE CURATED DATA%ROLE OF CALCINEURIN-DEPENDENT NFAT SIGNALING IN LYMPHOCYTES		45	-0.305846	-1.07143	0.330508	0.495587	1	2255	tags=22%, list=14%, signal=26%
TNF RECEPTOR SIGNALING PATHWAY%PATHWAY INTERACTION DATABASE NCI-NATURE CURATED DATA%TNF RECEPTOR SIGNALING PATHWAY	TNF RECEPTOR SIGNALING PATHWAY%PATHWAY INTERACTION DATABASE NCI-NATURE CURATED DATA%TNF RECEPTOR SIGNALING PATHWAY		43	-0.302154	-1.0711	0.333333	0.495312	1	2475	tags=28%, list=15%, signal=33%
CASPASE CASCADE IN APOPTOSIS%PATHWAY INTERACTION DATABASE NCI-NATURE CURATED DATA%CASPASE CASCADE IN APOPTOSIS	CASPASE CASCADE IN APOPTOSIS%PATHWAY INTERACTION DATABASE NCI-NATURE CURATED DATA%CASPASE CASCADE IN APOPTOSIS		47	-0.299585	-1.07018	0.314763	0.496324	1	2059	tags=21%, list=13%, signal=24%
PID_INSULIN_GLUCOSE_PATHWAY%MSIGDB_C2%PID_INSULIN_GLUCOSE_PATHWAY	PID_INSULIN_GLUCOSE_PATHWAY%MSIGDB_C2%PID_INSULIN_GLUCOSE_PATHWAY		23	-0.353724	-1.06995	0.358779	0.495845	1	2732	tags=26%, list=17%, signal=31%
PID_TNF_PATHWAY%MSIGDB_C2%PID_TNF_PATHWAY	PID_TNF_PATHWAY%MSIGDB_C2%PID_TNF_PATHWAY		43	-0.302154	-1.06943	0.339474	0.496003	1	2475	tags=28%, list=15%, signal=33%
NA+ CL- DEPENDENT NEUROTRANSMITTER TRANSPORTERS%REACTOME DATABASE ID RELEASE 57%442660	NA+ CL- DEPENDENT NEUROTRANSMITTER TRANSPORTERS%REACTOME DATABASE ID RELEASE 57%442660		18	-0.369995	-1.06918	0.355294	0.495507	1	255	tags=11%, list=2%, signal=11%
CELLULAR SENESCENCE%REACTOME DATABASE ID RELEASE 57%2559583	CELLULAR SENESCENCE%REACTOME DATABASE ID RELEASE 57%2559583		124	-0.248513	-1.06456	0.289037	0.505179	1	2887	tags=27%, list=18%, signal=32%
PID_CERAMIDE_PATHWAY%MSIGDB_C2%PID_CERAMIDE_PATHWAY	PID_CERAMIDE_PATHWAY%MSIGDB_C2%PID_CERAMIDE_PATHWAY		45	-0.299947	-1.06401	0.316239	0.505394	1	3633	tags=38%, list=23%, signal=49%
IL3%NETPATH%IL3	IL3%NETPATH%IL3		75	-0.270607	-1.06296	0.317221	0.506781	1	727	tags=12%, list=5%, signal=13%
PID_INSULIN_PATHWAY%MSIGDB_C2%PID_INSULIN_PATHWAY	PID_INSULIN_PATHWAY%MSIGDB_C2%PID_INSULIN_PATHWAY		43	-0.296738	-1.06104	0.366848	0.510142	1	3023	tags=33%, list=19%, signal=40%
EUKARYOTIC TRANSLATION TERMINATION%REACTOME DATABASE ID RELEASE 57%72764	EUKARYOTIC TRANSLATION TERMINATION%REACTOME DATABASE ID RELEASE 57%72764		37	-0.317958	-1.06071	0.349246	0.509881	1	3520	tags=41%, list=22%, signal=52%
HALLMARK_FATTY_ACID_METABOLISM%MSIGDB_C2%HALLMARK_FATTY_ACID_METABOLISM	HALLMARK_FATTY_ACID_METABOLISM%MSIGDB_C2%HALLMARK_FATTY_ACID_METABOLISM		137	-0.248062	-1.0548	0.29682	0.522774	1	3265	tags=33%, list=20%, signal=41%
HOMOLOGY DIRECTED REPAIR%REACTOME%R-HSA-5693538.1	HOMOLOGY DIRECTED REPAIR%REACTOME%R-HSA-5693538.1		90	-0.257534	-1.05298	0.308197	0.525922	1	3693	tags=30%, list=23%, signal=39%
MYOGENESIS%REACTOME DATABASE ID RELEASE 57%525793	MYOGENESIS%REACTOME DATABASE ID RELEASE 57%525793		26	-0.339825	-1.05289	0.365789	0.525089	1	3952	tags=27%, list=25%, signal=36%
INSULIN-MEDIATED GLUCOSE TRANSPORT%PATHWAY INTERACTION DATABASE NCI-NATURE CURATED DATA%INSULIN-MEDIATED GLUCOSE TRANSPORT	INSULIN-MEDIATED GLUCOSE TRANSPORT%PATHWAY INTERACTION DATABASE NCI-NATURE CURATED DATA%INSULIN-MEDIATED GLUCOSE TRANSPORT		23	-0.353724	-1.05094	0.382716	0.528717	1	2732	tags=26%, list=17%, signal=31%
PID_CASPASE_PATHWAY%MSIGDB_C2%PID_CASPASE_PATHWAY	PID_CASPASE_PATHWAY%MSIGDB_C2%PID_CASPASE_PATHWAY		48	-0.293699	-1.04901	0.381963	0.531966	1	2059	tags=21%, list=13%, signal=24%
REGULATION OF TP53 ACTIVITY%REACTOME%R-HSA-5633007.1	REGULATION OF TP53 ACTIVITY%REACTOME%R-HSA-5633007.1		127	-0.248562	-1.04896	0.335616	0.531046	1	2832	tags=24%, list=18%, signal=28%
SUPERPATHWAY OF CHOLESTEROL BIOSYNTHESIS%HUMANCYC%PWY66-5	SUPERPATHWAY OF CHOLESTEROL BIOSYNTHESIS%HUMANCYC%PWY66-5		21	-0.345841	-1.04627	0.376884	0.536194	1	2354	tags=29%, list=15%, signal=33%
CCR9%IOB%CCR9	CCR9%IOB%CCR9		18	-0.36537	-1.04357	0.388626	0.541621	1	3160	tags=28%, list=20%, signal=35%
FORMATION OF THE BETA-CATENIN:TCF TRANSACTIVATING COMPLEX%REACTOME DATABASE ID RELEASE 57%201722	FORMATION OF THE BETA-CATENIN:TCF TRANSACTIVATING COMPLEX%REACTOME DATABASE ID RELEASE 57%201722		37	-0.307092	-1.04196	0.351648	0.544283	1	4384	tags=41%, list=27%, signal=56%
DISASSEMBLY OF THE DESTRUCTION COMPLEX AND RECRUITMENT OF AXIN TO THE MEMBRANE%REACTOME%R-HSA-4641262.3	DISASSEMBLY OF THE DESTRUCTION COMPLEX AND RECRUITMENT OF AXIN TO THE MEMBRANE%REACTOME%R-HSA-4641262.3		30	-0.319949	-1.04183	0.368957	0.543488	1	3759	tags=37%, list=23%, signal=48%
CDO IN MYOGENESIS%REACTOME%R-HSA-375170.1	CDO IN MYOGENESIS%REACTOME%R-HSA-375170.1		26	-0.339825	-1.03776	0.394022	0.552103	1	3952	tags=27%, list=25%, signal=36%
MITOCHONDRIAL TRNA AMINOACYLATION%REACTOME DATABASE ID RELEASE 57%379726	MITOCHONDRIAL TRNA AMINOACYLATION%REACTOME DATABASE ID RELEASE 57%379726		20	-0.359963	-1.03734	0.388601	0.552092	1	2522	tags=30%, list=16%, signal=36%
G2 M DNA DAMAGE CHECKPOINT%REACTOME DATABASE ID RELEASE 57%69473	G2 M DNA DAMAGE CHECKPOINT%REACTOME DATABASE ID RELEASE 57%69473		56	-0.281405	-1.03476	0.390533	0.557243	1	1891	tags=20%, list=12%, signal=22%
IRE1ALPHA ACTIVATES CHAPERONES%REACTOME%R-HSA-381070.1	IRE1ALPHA ACTIVATES CHAPERONES%REACTOME%R-HSA-381070.1		46	-0.292088	-1.03086	0.371601	0.565658	1	1838	tags=15%, list=11%, signal=17%
BIOCARTA_CXCR4_PATHWAY%MSIGDB_C2%BIOCARTA_CXCR4_PATHWAY	BIOCARTA_CXCR4_PATHWAY%MSIGDB_C2%BIOCARTA_CXCR4_PATHWAY		23	-0.336848	-1.03065	0.413706	0.565042	1	1467	tags=22%, list=9%, signal=24%
SYNTHESIS AND INTERCONVERSION OF NUCLEOTIDE DI- AND TRIPHOSPHATES%REACTOME DATABASE ID RELEASE 57%499943	SYNTHESIS AND INTERCONVERSION OF NUCLEOTIDE DI- AND TRIPHOSPHATES%REACTOME DATABASE ID RELEASE 57%499943		19	-0.350638	-1.02985	0.401028	0.565879	1	4263	tags=63%, list=27%, signal=86%
XBP1(S) ACTIVATES CHAPERONE GENES%REACTOME%R-HSA-381038.1	XBP1(S) ACTIVATES CHAPERONE GENES%REACTOME%R-HSA-381038.1		44	-0.293018	-1.02826	0.388102	0.56876	1	1838	tags=16%, list=11%, signal=18%
GLUCOSE METABOLISM%REACTOME DATABASE ID RELEASE 57%70326	GLUCOSE METABOLISM%REACTOME DATABASE ID RELEASE 57%70326		62	-0.273345	-1.02703	0.380117	0.570749	1	2470	tags=26%, list=15%, signal=30%
5HT4 TYPE RECEPTOR MEDIATED SIGNALING PATHWAY%PANTHER PATHWAY%P04376	5HT4 TYPE RECEPTOR MEDIATED SIGNALING PATHWAY%PANTHER PATHWAY%P04376		29	-0.319328	-1.02647	0.398438	0.570998	1	1291	tags=21%, list=8%, signal=22%
BIOCARTA_TID_PATHWAY%MSIGDB_C2%BIOCARTA_TID_PATHWAY	BIOCARTA_TID_PATHWAY%MSIGDB_C2%BIOCARTA_TID_PATHWAY		17	-0.355224	-1.0225	0.423611	0.579538	1	2204	tags=29%, list=14%, signal=34%
GLYCOLYSIS%REACTOME DATABASE ID RELEASE 57%70171	GLYCOLYSIS%REACTOME DATABASE ID RELEASE 57%70171		25	-0.327143	-1.01956	0.428571	0.585914	1	2267	tags=24%, list=14%, signal=28%
SIGNALING BY FGFR IN DISEASE%REACTOME%R-HSA-1226099.3	SIGNALING BY FGFR IN DISEASE%REACTOME%R-HSA-1226099.3		56	-0.277751	-1.01887	0.420213	0.586529	1	3734	tags=34%, list=23%, signal=44%
PYRIMIDINE METABOLISM%REACTOME DATABASE ID RELEASE 57%73848	PYRIMIDINE METABOLISM%REACTOME DATABASE ID RELEASE 57%73848		23	-0.336926	-1.01785	0.420428	0.587987	1	1186	tags=22%, list=7%, signal=23%
RHO GTPASE EFFECTORS%REACTOME DATABASE ID RELEASE 57%195258	RHO GTPASE EFFECTORS%REACTOME DATABASE ID RELEASE 57%195258		216	-0.221819	-1.0159	0.384977	0.591672	1	2922	tags=22%, list=18%, signal=26%
SIGNALING BY FGFR2 IN DISEASE%REACTOME DATABASE ID RELEASE 57%5655253	SIGNALING BY FGFR2 IN DISEASE%REACTOME DATABASE ID RELEASE 57%5655253		38	-0.29255	-1.01422	0.401042	0.5947	1	3734	tags=32%, list=23%, signal=41%
RHO GTPASES ACTIVATE PKNS%REACTOME DATABASE ID RELEASE 57%5625740	RHO GTPASES ACTIVATE PKNS%REACTOME DATABASE ID RELEASE 57%5625740		38	-0.300777	-1.01264	0.41555	0.597683	1	2322	tags=24%, list=14%, signal=28%
CYTOSKELETAL REGULATION BY RHO GTPASE%PANTHER PATHWAY%P00016	CYTOSKELETAL REGULATION BY RHO GTPASE%PANTHER PATHWAY%P00016		58	-0.274069	-1.01237	0.424069	0.597165	1	2074	tags=17%, list=13%, signal=20%
TGF_BETA_RECEPTOR%NETPATH%TGF_BETA_RECEPTOR	TGF_BETA_RECEPTOR%NETPATH%TGF_BETA_RECEPTOR		203	-0.222468	-1.01132	0.385542	0.598624	1	2582	tags=19%, list=16%, signal=22%
FATTY ACID &BETA;-OXIDATION I%HUMANCYC%FAO-PWY	FATTY ACID &BETA;-OXIDATION I%HUMANCYC%FAO-PWY		15	-0.372781	-1.00994	0.437811	0.601025	1	3040	tags=40%, list=19%, signal=49%
BIOCARTA_NFKB_PATHWAY%MSIGDB_C2%BIOCARTA_NFKB_PATHWAY	BIOCARTA_NFKB_PATHWAY%MSIGDB_C2%BIOCARTA_NFKB_PATHWAY		23	-0.329714	-1.00983	0.421995	0.60016	1	2582	tags=26%, list=16%, signal=31%
RAF ACTIVATION%REACTOME DATABASE ID RELEASE 57%5673000	RAF ACTIVATION%REACTOME DATABASE ID RELEASE 57%5673000		23	-0.339159	-1.00873	0.458438	0.601745	1	2204	tags=26%, list=14%, signal=30%
TGF_BETA_RECEPTOR%IOB%TGF_BETA_RECEPTOR	TGF_BETA_RECEPTOR%IOB%TGF_BETA_RECEPTOR		179	-0.226418	-1.00728	0.427509	0.604149	1	2534	tags=18%, list=16%, signal=22%
NGF%IOB%NGF	NGF%IOB%NGF		19	-0.345145	-1.00594	0.437975	0.606411	1	2273	tags=21%, list=14%, signal=25%
BIOCARTA_G1_PATHWAY%MSIGDB_C2%BIOCARTA_G1_PATHWAY	BIOCARTA_G1_PATHWAY%MSIGDB_C2%BIOCARTA_G1_PATHWAY		23	-0.333392	-1.00465	0.439589	0.608609	1	1437	tags=22%, list=9%, signal=24%
NONSENSE-MEDIATED DECAY (NMD)%REACTOME%R-HSA-927802.2	NONSENSE-MEDIATED DECAY (NMD)%REACTOME%R-HSA-927802.2		55	-0.272379	-1.00209	0.423295	0.61408	1	3577	tags=35%, list=22%, signal=44%
AMINE COMPOUND SLC TRANSPORTERS%REACTOME%R-HSA-425428.1	AMINE COMPOUND SLC TRANSPORTERS%REACTOME%R-HSA-425428.1		28	-0.316945	-1.00144	0.42394	0.614539	1	1090	tags=14%, list=7%, signal=15%
NONSENSE MEDIATED DECAY (NMD) ENHANCED BY THE EXON JUNCTION COMPLEX (EJC)%REACTOME DATABASE ID RELEASE 57%975957	NONSENSE MEDIATED DECAY (NMD) ENHANCED BY THE EXON JUNCTION COMPLEX (EJC)%REACTOME DATABASE ID RELEASE 57%975957		55	-0.272379	-1.00045	0.444126	0.616092	1	3577	tags=35%, list=22%, signal=44%
METABOTROPIC GLUTAMATE RECEPTOR GROUP I PATHWAY%PANTHER PATHWAY%P00041	METABOTROPIC GLUTAMATE RECEPTOR GROUP I PATHWAY%PANTHER PATHWAY%P00041		22	-0.334325	-0.998333	0.426768	0.62031	1	2575	tags=32%, list=16%, signal=38%
VLDL INTERACTIONS%REACTOME%R-HSA-8855121.1	VLDL INTERACTIONS%REACTOME%R-HSA-8855121.1		22	-0.334982	-0.997844	0.459596	0.620438	1	2935	tags=27%, list=18%, signal=33%
PID_HNF3A_PATHWAY%MSIGDB_C2%PID_HNF3A_PATHWAY	PID_HNF3A_PATHWAY%MSIGDB_C2%PID_HNF3A_PATHWAY		33	-0.301456	-0.995257	0.444988	0.625921	1	2865	tags=30%, list=18%, signal=37%
RA BIOSYNTHESIS PATHWAY%REACTOME%R-HSA-5365859.2	RA BIOSYNTHESIS PATHWAY%REACTOME%R-HSA-5365859.2		16	-0.362608	-0.994919	0.47561	0.625661	1	17	tags=6%, list=0%, signal=6%
FOXA1 TRANSCRIPTION FACTOR NETWORK%PATHWAY INTERACTION DATABASE NCI-NATURE CURATED DATA%FOXA1 TRANSCRIPTION FACTOR NETWORK	FOXA1 TRANSCRIPTION FACTOR NETWORK%PATHWAY INTERACTION DATABASE NCI-NATURE CURATED DATA%FOXA1 TRANSCRIPTION FACTOR NETWORK		33	-0.301456	-0.990978	0.452778	0.634834	1	2865	tags=30%, list=18%, signal=37%
BIOCARTA_CHEMICAL_PATHWAY%MSIGDB_C2%BIOCARTA_CHEMICAL_PATHWAY	BIOCARTA_CHEMICAL_PATHWAY%MSIGDB_C2%BIOCARTA_CHEMICAL_PATHWAY		21	-0.338929	-0.988077	0.470874	0.641234	1	1207	tags=24%, list=8%, signal=26%
SIGNALING BY INSULIN RECEPTOR%REACTOME%R-HSA-74752.1	SIGNALING BY INSULIN RECEPTOR%REACTOME%R-HSA-74752.1		264	-0.210104	-0.987739	0.542601	0.640913	1	2562	tags=21%, list=16%, signal=25%
OVARIAN TUMOR DOMAIN PROTEASES%REACTOME DATABASE ID RELEASE 57%5689896	OVARIAN TUMOR DOMAIN PROTEASES%REACTOME DATABASE ID RELEASE 57%5689896		29	-0.308298	-0.986773	0.474934	0.642217	1	1207	tags=21%, list=8%, signal=22%
G BETA:GAMMA SIGNALLING THROUGH PI3KGAMMA%REACTOME DATABASE ID RELEASE 57%392451	G BETA:GAMMA SIGNALLING THROUGH PI3KGAMMA%REACTOME DATABASE ID RELEASE 57%392451		41	-0.279821	-0.98168	0.487113	0.654197	1	1156	tags=15%, list=7%, signal=16%
BUTYRATE RESPONSE FACTOR 1 (BRF1) BINDS AND DESTABILIZES MRNA%REACTOME DATABASE ID RELEASE 57%450385	BUTYRATE RESPONSE FACTOR 1 (BRF1) BINDS AND DESTABILIZES MRNA%REACTOME DATABASE ID RELEASE 57%450385		16	-0.363861	-0.979719	0.478049	0.657966	1	2732	tags=31%, list=17%, signal=38%
TRANS-GOLGI NETWORK VESICLE BUDDING%REACTOME%R-HSA-199992.2	TRANS-GOLGI NETWORK VESICLE BUDDING%REACTOME%R-HSA-199992.2		61	-0.262991	-0.979694	0.497126	0.656821	1	2287	tags=20%, list=14%, signal=23%
INSULIN PATHWAY%PATHWAY INTERACTION DATABASE NCI-NATURE CURATED DATA%INSULIN PATHWAY	INSULIN PATHWAY%PATHWAY INTERACTION DATABASE NCI-NATURE CURATED DATA%INSULIN PATHWAY		42	-0.287213	-0.978908	0.491936	0.657652	1	3499	tags=36%, list=22%, signal=46%
CLATHRIN DERIVED VESICLE BUDDING%REACTOME DATABASE ID RELEASE 57%421837	CLATHRIN DERIVED VESICLE BUDDING%REACTOME DATABASE ID RELEASE 57%421837		61	-0.262991	-0.977361	0.476038	0.660444	1	2287	tags=20%, list=14%, signal=23%
TRANSPORT OF RIBONUCLEOPROTEINS INTO THE HOST NUCLEUS%REACTOME%R-HSA-168271.1	TRANSPORT OF RIBONUCLEOPROTEINS INTO THE HOST NUCLEUS%REACTOME%R-HSA-168271.1		23	-0.318691	-0.977132	0.501217	0.659932	1	2290	tags=17%, list=14%, signal=20%
GENE SILENCING BY RNA%REACTOME DATABASE ID RELEASE 57%211000	GENE SILENCING BY RNA%REACTOME DATABASE ID RELEASE 57%211000		73	-0.253836	-0.975878	0.489736	0.662078	1	2003	tags=16%, list=12%, signal=19%
TNFSF1%IOB%TNFSF1	TNFSF1%IOB%TNFSF1		16	-0.346958	-0.973844	0.474299	0.666031	1	3633	tags=31%, list=23%, signal=40%
BIOCARTA_ARF_PATHWAY%MSIGDB_C2%BIOCARTA_ARF_PATHWAY	BIOCARTA_ARF_PATHWAY%MSIGDB_C2%BIOCARTA_ARF_PATHWAY		16	-0.339758	-0.973172	0.463351	0.666554	1	1207	tags=13%, list=8%, signal=14%
SIGNALING EVENTS MEDIATED BY HEPATOCYTE GROWTH FACTOR RECEPTOR (C-MET)%PATHWAY INTERACTION DATABASE NCI-NATURE CURATED DATA%SIGNALING EVENTS MEDIATED BY HEPATOCYTE GROWTH FACTOR RECEPTOR (C-MET)	SIGNALING EVENTS MEDIATED BY HEPATOCYTE GROWTH FACTOR RECEPTOR (C-MET)%PATHWAY INTERACTION DATABASE NCI-NATURE CURATED DATA%SIGNALING EVENTS MEDIATED BY HEPATOCYTE GROWTH FACTOR RECEPTOR (C-MET)		76	-0.248332	-0.971999	0.495468	0.668357	1	1467	tags=16%, list=9%, signal=17%
GOLGI ASSOCIATED VESICLE BIOGENESIS%REACTOME DATABASE ID RELEASE 57%432722	GOLGI ASSOCIATED VESICLE BIOGENESIS%REACTOME DATABASE ID RELEASE 57%432722		43	-0.274781	-0.971831	0.50838	0.667637	1	4502	tags=37%, list=28%, signal=52%
TP53 REGULATES METABOLIC GENES%REACTOME DATABASE ID RELEASE 57%5628897	TP53 REGULATES METABOLIC GENES%REACTOME DATABASE ID RELEASE 57%5628897		67	-0.253852	-0.969934	0.508671	0.671424	1	1941	tags=21%, list=12%, signal=24%
BASIGIN INTERACTIONS%REACTOME DATABASE ID RELEASE 57%210991	BASIGIN INTERACTIONS%REACTOME DATABASE ID RELEASE 57%210991		23	-0.314091	-0.968509	0.464935	0.673905	1	1131	tags=22%, list=7%, signal=23%
MEMBRANE TRAFFICKING%REACTOME%R-HSA-199991.3	MEMBRANE TRAFFICKING%REACTOME%R-HSA-199991.3		450	-0.195607	-0.968403	0.604027	0.672955	1	3377	tags=24%, list=21%, signal=30%
SIGNALING BY WNT IN CANCER%REACTOME DATABASE ID RELEASE 57%4791275	SIGNALING BY WNT IN CANCER%REACTOME DATABASE ID RELEASE 57%4791275		34	-0.287099	-0.968384	0.522727	0.671787	1	994	tags=15%, list=6%, signal=16%
PID_TCR_PATHWAY%MSIGDB_C2%PID_TCR_PATHWAY	PID_TCR_PATHWAY%MSIGDB_C2%PID_TCR_PATHWAY		62	-0.256551	-0.965691	0.494083	0.677592	1	2835	tags=27%, list=18%, signal=33%
PID_MET_PATHWAY%MSIGDB_C2%PID_MET_PATHWAY	PID_MET_PATHWAY%MSIGDB_C2%PID_MET_PATHWAY		77	-0.244475	-0.960837	0.524862	0.689037	1	1467	tags=16%, list=9%, signal=17%
KITRECEPTOR%IOB%KITRECEPTOR	KITRECEPTOR%IOB%KITRECEPTOR		83	-0.241794	-0.960424	0.535826	0.688788	1	727	tags=10%, list=5%, signal=10%
ERK MAPK TARGETS%REACTOME DATABASE ID RELEASE 57%198753	ERK MAPK TARGETS%REACTOME DATABASE ID RELEASE 57%198753		21	-0.32141	-0.959685	0.514212	0.689622	1	2549	tags=24%, list=16%, signal=28%
TCR SIGNALING IN NAIVE CD4+ T CELLS%PATHWAY INTERACTION DATABASE NCI-NATURE CURATED DATA%TCR SIGNALING IN NAIVE CD4+ T CELLS	TCR SIGNALING IN NAIVE CD4+ T CELLS%PATHWAY INTERACTION DATABASE NCI-NATURE CURATED DATA%TCR SIGNALING IN NAIVE CD4+ T CELLS		61	-0.255339	-0.958644	0.525157	0.691105	1	2732	tags=26%, list=17%, signal=31%
SIGNALING EVENTS MEDIATED BY HDAC CLASS II%PATHWAY INTERACTION DATABASE NCI-NATURE CURATED DATA%SIGNALING EVENTS MEDIATED BY HDAC CLASS II	SIGNALING EVENTS MEDIATED BY HDAC CLASS II%PATHWAY INTERACTION DATABASE NCI-NATURE CURATED DATA%SIGNALING EVENTS MEDIATED BY HDAC CLASS II		31	-0.293913	-0.958028	0.515385	0.691431	1	2233	tags=19%, list=14%, signal=22%
IL4%NETPATH%IL4	IL4%NETPATH%IL4		69	-0.241907	-0.955964	0.550143	0.69552	1	2835	tags=23%, list=18%, signal=28%
PID_HDAC_CLASSII_PATHWAY%MSIGDB_C2%PID_HDAC_CLASSII_PATHWAY	PID_HDAC_CLASSII_PATHWAY%MSIGDB_C2%PID_HDAC_CLASSII_PATHWAY		31	-0.293913	-0.952587	0.530928	0.70304	1	2233	tags=19%, list=14%, signal=22%
NOTCH1 INTRACELLULAR DOMAIN REGULATES TRANSCRIPTION%REACTOME%R-HSA-2122947.2	NOTCH1 INTRACELLULAR DOMAIN REGULATES TRANSCRIPTION%REACTOME%R-HSA-2122947.2		38	-0.283575	-0.951754	0.526316	0.703974	1	3131	tags=34%, list=20%, signal=42%
HEDGEHOG SIGNALING PATHWAY%PANTHER PATHWAY%P00025	HEDGEHOG SIGNALING PATHWAY%PANTHER PATHWAY%P00025		18	-0.339078	-0.948343	0.544392	0.711715	1	2255	tags=22%, list=14%, signal=26%
MICRORNA (MIRNA) BIOGENESIS%REACTOME%R-HSA-203927.2	MICRORNA (MIRNA) BIOGENESIS%REACTOME%R-HSA-203927.2		21	-0.324033	-0.943798	0.543641	0.722328	1	3734	tags=38%, list=23%, signal=50%
P53 PATHWAY%PANTHER PATHWAY%P00059	P53 PATHWAY%PANTHER PATHWAY%P00059		35	-0.28494	-0.943785	0.56266	0.721089	1	2732	tags=29%, list=17%, signal=34%
SIGNAL TRANSDUCTION BY L1%REACTOME%R-HSA-445144.1	SIGNAL TRANSDUCTION BY L1%REACTOME%R-HSA-445144.1		17	-0.340384	-0.941321	0.544794	0.726177	1	1074	tags=18%, list=7%, signal=19%
HALLMARK_NOTCH_SIGNALING%MSIGDB_C2%HALLMARK_NOTCH_SIGNALING	HALLMARK_NOTCH_SIGNALING%MSIGDB_C2%HALLMARK_NOTCH_SIGNALING		30	-0.289052	-0.939249	0.559113	0.730128	1	2440	tags=33%, list=15%, signal=39%
HALLMARK_PROTEIN_SECRETION%MSIGDB_C2%HALLMARK_PROTEIN_SECRETION	HALLMARK_PROTEIN_SECRETION%MSIGDB_C2%HALLMARK_PROTEIN_SECRETION		84	-0.230352	-0.936499	0.632258	0.735747	1	2673	tags=25%, list=17%, signal=30%
CTLA4 INHIBITORY SIGNALING%REACTOME DATABASE ID RELEASE 57%389513	CTLA4 INHIBITORY SIGNALING%REACTOME DATABASE ID RELEASE 57%389513		21	-0.316398	-0.936334	0.568238	0.734837	1	678	tags=14%, list=4%, signal=15%
PID_CDC42_PATHWAY%MSIGDB_C2%PID_CDC42_PATHWAY	PID_CDC42_PATHWAY%MSIGDB_C2%PID_CDC42_PATHWAY		62	-0.247708	-0.935527	0.574713	0.735648	1	1467	tags=16%, list=9%, signal=18%
BCR SIGNALING PATHWAY%PATHWAY INTERACTION DATABASE NCI-NATURE CURATED DATA%BCR SIGNALING PATHWAY	BCR SIGNALING PATHWAY%PATHWAY INTERACTION DATABASE NCI-NATURE CURATED DATA%BCR SIGNALING PATHWAY		60	-0.246966	-0.934401	0.558747	0.73733	1	3645	tags=32%, list=23%, signal=41%
ENDOGENOUS STEROLS%REACTOME%R-HSA-211976.3	ENDOGENOUS STEROLS%REACTOME%R-HSA-211976.3		21	-0.315455	-0.929444	0.549223	0.748763	1	82	tags=10%, list=1%, signal=10%
PIWI-INTERACTING RNA (PIRNA) BIOGENESIS%REACTOME%R-HSA-5601884.1	PIWI-INTERACTING RNA (PIRNA) BIOGENESIS%REACTOME%R-HSA-5601884.1		27	-0.286644	-0.929371	0.565104	0.747669	1	1301	tags=15%, list=8%, signal=16%
MITOTIC PROPHASE%REACTOME%R-HSA-68875.1	MITOTIC PROPHASE%REACTOME%R-HSA-68875.1		71	-0.238434	-0.928265	0.623494	0.749124	1	2166	tags=15%, list=14%, signal=18%
DNA DOUBLE-STRAND BREAK REPAIR%REACTOME%R-HSA-5693532.1	DNA DOUBLE-STRAND BREAK REPAIR%REACTOME%R-HSA-5693532.1		116	-0.222829	-0.927871	0.655431	0.748794	1	3693	tags=28%, list=23%, signal=37%
PID_BCR_5PATHWAY%MSIGDB_C2%PID_BCR_5PATHWAY	PID_BCR_5PATHWAY%MSIGDB_C2%PID_BCR_5PATHWAY		62	-0.246103	-0.92664	0.626471	0.750646	1	3645	tags=32%, list=23%, signal=42%
BIOCARTA_DEATH_PATHWAY%MSIGDB_C2%BIOCARTA_DEATH_PATHWAY	BIOCARTA_DEATH_PATHWAY%MSIGDB_C2%BIOCARTA_DEATH_PATHWAY		29	-0.291714	-0.925413	0.594937	0.752459	1	2198	tags=28%, list=14%, signal=32%
G-PROTEIN BETA:GAMMA SIGNALLING%REACTOME DATABASE ID RELEASE 57%397795	G-PROTEIN BETA:GAMMA SIGNALLING%REACTOME DATABASE ID RELEASE 57%397795		44	-0.261347	-0.922444	0.574932	0.758772	1	1156	tags=14%, list=7%, signal=15%
PRC2 METHYLATES HISTONES AND DNA%REACTOME%R-HSA-212300.1	PRC2 METHYLATES HISTONES AND DNA%REACTOME%R-HSA-212300.1		23	-0.304938	-0.921078	0.577889	0.760963	1	2887	tags=35%, list=18%, signal=42%
CDC42 SIGNALING EVENTS%PATHWAY INTERACTION DATABASE NCI-NATURE CURATED DATA%CDC42 SIGNALING EVENTS	CDC42 SIGNALING EVENTS%PATHWAY INTERACTION DATABASE NCI-NATURE CURATED DATA%CDC42 SIGNALING EVENTS		62	-0.247708	-0.919439	0.607029	0.76376	1	1467	tags=16%, list=9%, signal=18%
BCR%NETPATH%BCR	BCR%NETPATH%BCR		150	-0.208901	-0.91859	0.687943	0.764652	1	2732	tags=21%, list=17%, signal=25%
FGFR2 MUTANT RECEPTOR ACTIVATION%REACTOME%R-HSA-1839126.2	FGFR2 MUTANT RECEPTOR ACTIVATION%REACTOME%R-HSA-1839126.2		29	-0.285275	-0.915909	0.617647	0.770215	1	3734	tags=31%, list=23%, signal=40%
DEACTIVATION OF THE BETA-CATENIN TRANSACTIVATING COMPLEX%REACTOME DATABASE ID RELEASE 57%3769402	DEACTIVATION OF THE BETA-CATENIN TRANSACTIVATING COMPLEX%REACTOME DATABASE ID RELEASE 57%3769402		36	-0.269517	-0.912674	0.585608	0.776823	1	2941	tags=22%, list=18%, signal=27%
BIOCARTA_HCMV_PATHWAY%MSIGDB_C2%BIOCARTA_HCMV_PATHWAY	BIOCARTA_HCMV_PATHWAY%MSIGDB_C2%BIOCARTA_HCMV_PATHWAY		15	-0.341799	-0.912204	0.556075	0.77667	1	5105	tags=47%, list=32%, signal=68%
NUCLEAR EVENTS (KINASE AND TRANSCRIPTION FACTOR ACTIVATION)%REACTOME%R-HSA-198725.1	NUCLEAR EVENTS (KINASE AND TRANSCRIPTION FACTOR ACTIVATION)%REACTOME%R-HSA-198725.1		23	-0.300425	-0.911973	0.605459	0.775936	1	2549	tags=22%, list=16%, signal=26%
HALLMARK_PEROXISOME%MSIGDB_C2%HALLMARK_PEROXISOME	HALLMARK_PEROXISOME%MSIGDB_C2%HALLMARK_PEROXISOME		92	-0.223652	-0.90779	0.678457	0.785244	1	3199	tags=24%, list=20%, signal=30%
TSH%NETPATH%TSH	TSH%NETPATH%TSH		73	-0.230227	-0.905281	0.691395	0.790049	1	2865	tags=25%, list=18%, signal=30%
SIG_INSULIN_RECEPTOR_PATHWAY_IN_CARDIAC_MYOCYTES%MSIGDB_C2%SIG_INSULIN_RECEPTOR_PATHWAY_IN_CARDIAC_MYOCYTES	SIG_INSULIN_RECEPTOR_PATHWAY_IN_CARDIAC_MYOCYTES%MSIGDB_C2%SIG_INSULIN_RECEPTOR_PATHWAY_IN_CARDIAC_MYOCYTES		44	-0.251839	-0.904675	0.626344	0.790252	1	1157	tags=14%, list=7%, signal=15%
GPVI-MEDIATED ACTIVATION CASCADE%REACTOME DATABASE ID RELEASE 57%114604	GPVI-MEDIATED ACTIVATION CASCADE%REACTOME DATABASE ID RELEASE 57%114604		47	-0.252971	-0.901002	0.629834	0.797687	1	1156	tags=11%, list=7%, signal=11%
PEROXISOMAL LIPID METABOLISM%REACTOME%R-HSA-390918.4	PEROXISOMAL LIPID METABOLISM%REACTOME%R-HSA-390918.4		23	-0.293564	-0.899852	0.603819	0.79922	1	3073	tags=26%, list=19%, signal=32%
METALLOPROTEASE DUBS%REACTOME%R-HSA-5689901.1	METALLOPROTEASE DUBS%REACTOME%R-HSA-5689901.1		17	-0.328767	-0.898588	0.614325	0.801003	1	2123	tags=35%, list=13%, signal=41%
BIOCARTA_TNFR2_PATHWAY%MSIGDB_C2%BIOCARTA_TNFR2_PATHWAY	BIOCARTA_TNFR2_PATHWAY%MSIGDB_C2%BIOCARTA_TNFR2_PATHWAY		18	-0.309525	-0.898353	0.598063	0.800329	1	2981	tags=33%, list=19%, signal=41%
TRNA MODIFICATION IN THE NUCLEUS AND CYTOSOL%REACTOME DATABASE ID RELEASE 57%6782315	TRNA MODIFICATION IN THE NUCLEUS AND CYTOSOL%REACTOME DATABASE ID RELEASE 57%6782315		33	-0.265864	-0.892814	0.616188	0.812623	1	3421	tags=30%, list=21%, signal=38%
DNA DOUBLE STRAND BREAK RESPONSE%REACTOME DATABASE ID RELEASE 57%5693606	DNA DOUBLE STRAND BREAK RESPONSE%REACTOME DATABASE ID RELEASE 57%5693606		40	-0.252428	-0.892666	0.670391	0.811622	1	2233	tags=20%, list=14%, signal=23%
FATTY ACID, TRIACYLGLYCEROL, AND KETONE BODY METABOLISM%REACTOME DATABASE ID RELEASE 57%535734	FATTY ACID, TRIACYLGLYCEROL, AND KETONE BODY METABOLISM%REACTOME DATABASE ID RELEASE 57%535734		202	-0.197024	-0.892236	0.818182	0.811359	1	3131	tags=23%, list=20%, signal=29%
CARGO CONCENTRATION IN THE ER%REACTOME%R-HSA-5694530.1	CARGO CONCENTRATION IN THE ER%REACTOME%R-HSA-5694530.1		26	-0.282302	-0.885404	0.643799	0.82637	1	2965	tags=35%, list=18%, signal=42%
NICOTINE PHARMACODYNAMICS PATHWAY%PANTHER PATHWAY%P06587	NICOTINE PHARMACODYNAMICS PATHWAY%PANTHER PATHWAY%P06587		25	-0.280438	-0.884251	0.670157	0.827799	1	3070	tags=28%, list=19%, signal=35%
AXON GUIDANCE MEDIATED BY SEMAPHORINS%PANTHER PATHWAY%P00007	AXON GUIDANCE MEDIATED BY SEMAPHORINS%PANTHER PATHWAY%P00007		18	-0.307616	-0.882435	0.616868	0.830743	1	2818	tags=22%, list=18%, signal=27%
RECRUITMENT AND ATM-MEDIATED PHOSPHORYLATION OF REPAIR AND SIGNALING PROTEINS AT DNA DOUBLE STRAND BREAKS%REACTOME DATABASE ID RELEASE 57%5693565	RECRUITMENT AND ATM-MEDIATED PHOSPHORYLATION OF REPAIR AND SIGNALING PROTEINS AT DNA DOUBLE STRAND BREAKS%REACTOME DATABASE ID RELEASE 57%5693565		40	-0.252428	-0.88181	0.65995	0.830767	1	2233	tags=20%, list=14%, signal=23%
REGULATION OF GENE EXPRESSION IN BETA CELLS%REACTOME DATABASE ID RELEASE 57%210745	REGULATION OF GENE EXPRESSION IN BETA CELLS%REACTOME DATABASE ID RELEASE 57%210745		17	-0.320272	-0.880137	0.631579	0.833348	1	991	tags=12%, list=6%, signal=13%
PLK1 SIGNALING EVENTS%PATHWAY INTERACTION DATABASE NCI-NATURE CURATED DATA%PLK1 SIGNALING EVENTS	PLK1 SIGNALING EVENTS%PATHWAY INTERACTION DATABASE NCI-NATURE CURATED DATA%PLK1 SIGNALING EVENTS		40	-0.25713	-0.879647	0.68883	0.833116	1	5262	tags=50%, list=33%, signal=74%
PI METABOLISM%REACTOME DATABASE ID RELEASE 57%1483255	PI METABOLISM%REACTOME DATABASE ID RELEASE 57%1483255		54	-0.235315	-0.877729	0.737463	0.836205	1	2466	tags=22%, list=15%, signal=26%
VESICLE-MEDIATED TRANSPORT%REACTOME DATABASE ID RELEASE 57%5653656	VESICLE-MEDIATED TRANSPORT%REACTOME DATABASE ID RELEASE 57%5653656		479	-0.176858	-0.877636	0.974138	0.835046	1	3377	tags=23%, list=21%, signal=28%
AMINO ACID AND OLIGOPEPTIDE SLC TRANSPORTERS%REACTOME%R-HSA-425374.1	AMINO ACID AND OLIGOPEPTIDE SLC TRANSPORTERS%REACTOME%R-HSA-425374.1		44	-0.249831	-0.876699	0.664879	0.835938	1	757	tags=11%, list=5%, signal=12%
FATTY ACYL-COA BIOSYNTHESIS%REACTOME DATABASE ID RELEASE 57%75105	FATTY ACYL-COA BIOSYNTHESIS%REACTOME DATABASE ID RELEASE 57%75105		42	-0.254714	-0.874941	0.697051	0.838683	1	3626	tags=33%, list=23%, signal=43%
IL2%NETPATH%IL2	IL2%NETPATH%IL2		76	-0.222897	-0.872008	0.739612	0.844086	1	1156	tags=11%, list=7%, signal=11%
PID_FOXM1_PATHWAY%MSIGDB_C2%PID_FOXM1_PATHWAY	PID_FOXM1_PATHWAY%MSIGDB_C2%PID_FOXM1_PATHWAY		35	-0.258543	-0.870787	0.678378	0.845425	1	754	tags=11%, list=5%, signal=12%
GDNF%IOB%GDNF	GDNF%IOB%GDNF		34	-0.262062	-0.867485	0.692112	0.851488	1	1844	tags=18%, list=12%, signal=20%
BIOCARTA_TH1TH2_PATHWAY%MSIGDB_C2%BIOCARTA_TH1TH2_PATHWAY	BIOCARTA_TH1TH2_PATHWAY%MSIGDB_C2%BIOCARTA_TH1TH2_PATHWAY		16	-0.319218	-0.866428	0.657568	0.852366	1	1569	tags=19%, list=10%, signal=21%
HEDGEHOG SIGNALING EVENTS MEDIATED BY GLI PROTEINS%PATHWAY INTERACTION DATABASE NCI-NATURE CURATED DATA%HEDGEHOG SIGNALING EVENTS MEDIATED BY GLI PROTEINS	HEDGEHOG SIGNALING EVENTS MEDIATED BY GLI PROTEINS%PATHWAY INTERACTION DATABASE NCI-NATURE CURATED DATA%HEDGEHOG SIGNALING EVENTS MEDIATED BY GLI PROTEINS		45	-0.23872	-0.865366	0.728682	0.853227	1	2732	tags=24%, list=17%, signal=29%
SIG_CD40PATHWAYMAP%MSIGDB_C2%SIG_CD40PATHWAYMAP	SIG_CD40PATHWAYMAP%MSIGDB_C2%SIG_CD40PATHWAYMAP		31	-0.270814	-0.864031	0.692105	0.854811	1	3633	tags=35%, list=23%, signal=46%
GMCSF-MEDIATED SIGNALING EVENTS%PATHWAY INTERACTION DATABASE NCI-NATURE CURATED DATA%GMCSF-MEDIATED SIGNALING EVENTS	GMCSF-MEDIATED SIGNALING EVENTS%PATHWAY INTERACTION DATABASE NCI-NATURE CURATED DATA%GMCSF-MEDIATED SIGNALING EVENTS		32	-0.263858	-0.861069	0.700767	0.85998	1	2229	tags=22%, list=14%, signal=25%
CHOLESTEROL BIOSYNTHESIS%REACTOME%R-HSA-191273.3	CHOLESTEROL BIOSYNTHESIS%REACTOME%R-HSA-191273.3		19	-0.300072	-0.859847	0.661765	0.861282	1	2354	tags=26%, list=15%, signal=31%
FOXM1 TRANSCRIPTION FACTOR NETWORK%PATHWAY INTERACTION DATABASE NCI-NATURE CURATED DATA%FOXM1 TRANSCRIPTION FACTOR NETWORK	FOXM1 TRANSCRIPTION FACTOR NETWORK%PATHWAY INTERACTION DATABASE NCI-NATURE CURATED DATA%FOXM1 TRANSCRIPTION FACTOR NETWORK		35	-0.258543	-0.85918	0.697789	0.861382	1	754	tags=11%, list=5%, signal=12%
CELLULAR RESPONSE TO HEAT STRESS%REACTOME%R-HSA-3371556.1	CELLULAR RESPONSE TO HEAT STRESS%REACTOME%R-HSA-3371556.1		72	-0.218009	-0.85574	0.791176	0.867338	1	3098	tags=22%, list=19%, signal=27%
BIOCARTA_GH_PATHWAY%MSIGDB_C2%BIOCARTA_GH_PATHWAY	BIOCARTA_GH_PATHWAY%MSIGDB_C2%BIOCARTA_GH_PATHWAY		26	-0.270102	-0.855538	0.68523	0.866418	1	2273	tags=23%, list=14%, signal=27%
PID_IL3_PATHWAY%MSIGDB_C2%PID_IL3_PATHWAY	PID_IL3_PATHWAY%MSIGDB_C2%PID_IL3_PATHWAY		23	-0.280189	-0.852131	0.70197	0.872259	1	3499	tags=35%, list=22%, signal=44%
REGULATION OF TP53 ACTIVITY THROUGH PHOSPHORYLATION%REACTOME%R-HSA-6804756.1	REGULATION OF TP53 ACTIVITY THROUGH PHOSPHORYLATION%REACTOME%R-HSA-6804756.1		70	-0.218988	-0.851892	0.813699	0.87134	1	2832	tags=23%, list=18%, signal=28%
P53 PATHWAY BY GLUCOSE DEPRIVATION%PANTHER PATHWAY%P04397	P53 PATHWAY BY GLUCOSE DEPRIVATION%PANTHER PATHWAY%P04397		19	-0.295807	-0.84882	0.656168	0.876446	1	1207	tags=16%, list=8%, signal=17%
HDR THROUGH HOMOLOGOUS RECOMBINATION (HRR)%REACTOME DATABASE ID RELEASE 57%5685942	HDR THROUGH HOMOLOGOUS RECOMBINATION (HRR)%REACTOME DATABASE ID RELEASE 57%5685942		52	-0.234305	-0.847575	0.767241	0.877641	1	3611	tags=29%, list=23%, signal=37%
SIG_IL4RECEPTOR_IN_B_LYPHOCYTES%MSIGDB_C2%SIG_IL4RECEPTOR_IN_B_LYPHOCYTES	SIG_IL4RECEPTOR_IN_B_LYPHOCYTES%MSIGDB_C2%SIG_IL4RECEPTOR_IN_B_LYPHOCYTES		26	-0.27125	-0.847435	0.725118	0.876534	1	727	tags=12%, list=5%, signal=12%
RESOLUTION OF ABASIC SITES (AP SITES)%REACTOME DATABASE ID RELEASE 57%73933	RESOLUTION OF ABASIC SITES (AP SITES)%REACTOME DATABASE ID RELEASE 57%73933		33	-0.256085	-0.845405	0.697613	0.879478	1	4909	tags=61%, list=31%, signal=87%
ENERGY DEPENDENT REGULATION OF MTOR BY LKB1-AMPK%REACTOME%R-HSA-380972.1	ENERGY DEPENDENT REGULATION OF MTOR BY LKB1-AMPK%REACTOME%R-HSA-380972.1		26	-0.267804	-0.844553	0.705736	0.879763	1	4326	tags=42%, list=27%, signal=58%
NUCLEAR ENVELOPE BREAKDOWN%REACTOME DATABASE ID RELEASE 57%2980766	NUCLEAR ENVELOPE BREAKDOWN%REACTOME DATABASE ID RELEASE 57%2980766		40	-0.242043	-0.842836	0.737789	0.881889	1	2166	tags=18%, list=14%, signal=20%
DARPP-32 EVENTS%REACTOME%R-HSA-180024.1	DARPP-32 EVENTS%REACTOME%R-HSA-180024.1		21	-0.280218	-0.84077	0.700258	0.884709	1	2703	tags=29%, list=17%, signal=34%
TP53 REGULATES TRANSCRIPTION OF CELL DEATH GENES%REACTOME%R-HSA-5633008.1	TP53 REGULATES TRANSCRIPTION OF CELL DEATH GENES%REACTOME%R-HSA-5633008.1		34	-0.247069	-0.83952	0.724324	0.885872	1	2255	tags=24%, list=14%, signal=27%
PID_PLK1_PATHWAY%MSIGDB_C2%PID_PLK1_PATHWAY	PID_PLK1_PATHWAY%MSIGDB_C2%PID_PLK1_PATHWAY		40	-0.240574	-0.838944	0.741333	0.885726	1	5262	tags=50%, list=33%, signal=74%
EXPORT OF VIRAL RIBONUCLEOPROTEINS FROM NUCLEUS%REACTOME DATABASE ID RELEASE 57%168274	EXPORT OF VIRAL RIBONUCLEOPROTEINS FROM NUCLEUS%REACTOME DATABASE ID RELEASE 57%168274		22	-0.277409	-0.83893	0.715346	0.884344	1	1917	tags=14%, list=12%, signal=15%
HDMS DEMETHYLATE HISTONES%REACTOME%R-HSA-3214842.2	HDMS DEMETHYLATE HISTONES%REACTOME%R-HSA-3214842.2		20	-0.294201	-0.838286	0.687003	0.884282	1	3738	tags=30%, list=23%, signal=39%
G-CSF%IOB%G-CSF	G-CSF%IOB%G-CSF		41	-0.242713	-0.837343	0.749333	0.884832	1	727	tags=10%, list=5%, signal=10%
PID_RAC1_PATHWAY%MSIGDB_C2%PID_RAC1_PATHWAY	PID_RAC1_PATHWAY%MSIGDB_C2%PID_RAC1_PATHWAY		50	-0.230181	-0.834411	0.763636	0.889298	1	2752	tags=20%, list=17%, signal=24%
GAP JUNCTION TRAFFICKING%REACTOME DATABASE ID RELEASE 57%190828	GAP JUNCTION TRAFFICKING%REACTOME DATABASE ID RELEASE 57%190828		25	-0.267001	-0.832794	0.704082	0.891068	1	101	tags=4%, list=1%, signal=4%
RAC1 SIGNALING PATHWAY%PATHWAY INTERACTION DATABASE NCI-NATURE CURATED DATA%RAC1 SIGNALING PATHWAY	RAC1 SIGNALING PATHWAY%PATHWAY INTERACTION DATABASE NCI-NATURE CURATED DATA%RAC1 SIGNALING PATHWAY		50	-0.230181	-0.832086	0.784153	0.891083	1	2752	tags=20%, list=17%, signal=24%
BASE EXCISION REPAIR%REACTOME%R-HSA-73884.1	BASE EXCISION REPAIR%REACTOME%R-HSA-73884.1		33	-0.256085	-0.828082	0.751843	0.897414	1	4909	tags=61%, list=31%, signal=87%
NUCLEAR IMPORT OF REV PROTEIN%REACTOME DATABASE ID RELEASE 57%180746	NUCLEAR IMPORT OF REV PROTEIN%REACTOME DATABASE ID RELEASE 57%180746		23	-0.280552	-0.827893	0.730198	0.896398	1	1917	tags=13%, list=12%, signal=15%
NEP NS2 INTERACTS WITH THE CELLULAR EXPORT MACHINERY%REACTOME DATABASE ID RELEASE 57%168333	NEP NS2 INTERACTS WITH THE CELLULAR EXPORT MACHINERY%REACTOME DATABASE ID RELEASE 57%168333		22	-0.277409	-0.824571	0.755981	0.901441	1	1917	tags=14%, list=12%, signal=15%
TGF-BETA RECEPTOR SIGNALING%PATHWAY INTERACTION DATABASE NCI-NATURE CURATED DATA%TGF-BETA RECEPTOR SIGNALING	TGF-BETA RECEPTOR SIGNALING%PATHWAY INTERACTION DATABASE NCI-NATURE CURATED DATA%TGF-BETA RECEPTOR SIGNALING		47	-0.227311	-0.823197	0.787062	0.902706	1	1334	tags=11%, list=8%, signal=12%
PID_HEDGEHOG_GLI_PATHWAY%MSIGDB_C2%PID_HEDGEHOG_GLI_PATHWAY	PID_HEDGEHOG_GLI_PATHWAY%MSIGDB_C2%PID_HEDGEHOG_GLI_PATHWAY		45	-0.230561	-0.819716	0.807388	0.907868	1	2732	tags=24%, list=17%, signal=29%
TRIGLYCERIDE BIOSYNTHESIS%REACTOME%R-HSA-75109.3	TRIGLYCERIDE BIOSYNTHESIS%REACTOME%R-HSA-75109.3		63	-0.218213	-0.819519	0.807388	0.906822	1	3626	tags=29%, list=23%, signal=37%
PID_TGFBR_PATHWAY%MSIGDB_C2%PID_TGFBR_PATHWAY	PID_TGFBR_PATHWAY%MSIGDB_C2%PID_TGFBR_PATHWAY		50	-0.223501	-0.819464	0.844118	0.90552	1	1334	tags=10%, list=8%, signal=11%
TRANSLOCATION OF GLUT4 TO THE PLASMA MEMBRANE%REACTOME%R-HSA-1445148.1	TRANSLOCATION OF GLUT4 TO THE PLASMA MEMBRANE%REACTOME%R-HSA-1445148.1		55	-0.218802	-0.816458	0.84022	0.90959	1	3023	tags=22%, list=19%, signal=27%
IL1%NETPATH%IL1	IL1%NETPATH%IL1		61	-0.218592	-0.815659	0.84097	0.909741	1	3048	tags=25%, list=19%, signal=30%
SYNTHESIS OF BILE ACIDS AND BILE SALTS%REACTOME%R-HSA-192105.1	SYNTHESIS OF BILE ACIDS AND BILE SALTS%REACTOME%R-HSA-192105.1		22	-0.269629	-0.810766	0.742857	0.917256	1	987	tags=14%, list=6%, signal=15%
ST_WNT_BETA_CATENIN_PATHWAY%MSIGDB_C2%ST_WNT_BETA_CATENIN_PATHWAY	ST_WNT_BETA_CATENIN_PATHWAY%MSIGDB_C2%ST_WNT_BETA_CATENIN_PATHWAY		31	-0.240527	-0.809237	0.805699	0.918579	1	3313	tags=29%, list=21%, signal=37%
HEDGEHOG%NETPATH%HEDGEHOG	HEDGEHOG%NETPATH%HEDGEHOG		36	-0.236454	-0.808886	0.830556	0.917868	1	3131	tags=31%, list=20%, signal=38%
ALPHA ADRENERGIC RECEPTOR SIGNALING PATHWAY%PANTHER PATHWAY%P00002	ALPHA ADRENERGIC RECEPTOR SIGNALING PATHWAY%PANTHER PATHWAY%P00002		21	-0.275082	-0.808777	0.754476	0.916625	1	1980	tags=24%, list=12%, signal=27%
INTEGRIN ALPHAIIB BETA3 SIGNALING%REACTOME%R-HSA-354192.1	INTEGRIN ALPHAIIB BETA3 SIGNALING%REACTOME%R-HSA-354192.1		24	-0.26877	-0.807999	0.737101	0.916605	1	2732	tags=25%, list=17%, signal=30%
TRANSCRIPTIONAL REGULATION OF WHITE ADIPOCYTE DIFFERENTIATION%REACTOME DATABASE ID RELEASE 57%381340	TRANSCRIPTIONAL REGULATION OF WHITE ADIPOCYTE DIFFERENTIATION%REACTOME DATABASE ID RELEASE 57%381340		73	-0.203961	-0.806802	0.887931	0.917218	1	840	tags=10%, list=5%, signal=10%
JNK (C-JUN KINASES) PHOSPHORYLATION AND ACTIVATION MEDIATED BY ACTIVATED HUMAN TAK1%REACTOME%R-HSA-450321.1	JNK (C-JUN KINASES) PHOSPHORYLATION AND ACTIVATION MEDIATED BY ACTIVATED HUMAN TAK1%REACTOME%R-HSA-450321.1		15	-0.289557	-0.806607	0.719895	0.916118	1	64	tags=7%, list=0%, signal=7%
E-CADHERIN SIGNALING IN THE NASCENT ADHERENS JUNCTION%PATHWAY INTERACTION DATABASE NCI-NATURE CURATED DATA%E-CADHERIN SIGNALING IN THE NASCENT ADHERENS JUNCTION	E-CADHERIN SIGNALING IN THE NASCENT ADHERENS JUNCTION%PATHWAY INTERACTION DATABASE NCI-NATURE CURATED DATA%E-CADHERIN SIGNALING IN THE NASCENT ADHERENS JUNCTION		31	-0.244896	-0.803816	0.790055	0.919458	1	3499	tags=29%, list=22%, signal=37%
PID_CXCR3_PATHWAY%MSIGDB_C2%PID_CXCR3_PATHWAY	PID_CXCR3_PATHWAY%MSIGDB_C2%PID_CXCR3_PATHWAY		38	-0.231532	-0.801751	0.817935	0.921357	1	2732	tags=24%, list=17%, signal=28%
SULFUR AMINO ACID METABOLISM%REACTOME DATABASE ID RELEASE 57%1614635	SULFUR AMINO ACID METABOLISM%REACTOME DATABASE ID RELEASE 57%1614635		20	-0.273302	-0.801144	0.770026	0.921021	1	685	tags=10%, list=4%, signal=10%
BIOCARTA_SHH_PATHWAY%MSIGDB_C2%BIOCARTA_SHH_PATHWAY	BIOCARTA_SHH_PATHWAY%MSIGDB_C2%BIOCARTA_SHH_PATHWAY		15	-0.295292	-0.798938	0.744186	0.923335	1	1667	tags=13%, list=10%, signal=15%
OLFACTORY SIGNALING PATHWAY%REACTOME%R-HSA-381753.1	OLFACTORY SIGNALING PATHWAY%REACTOME%R-HSA-381753.1		116	-0.191422	-0.798469	0.912458	0.922692	1	12465	tags=99%, list=78%, signal=442%
METABOLISM OF WATER-SOLUBLE VITAMINS AND COFACTORS%REACTOME DATABASE ID RELEASE 57%196849	METABOLISM OF WATER-SOLUBLE VITAMINS AND COFACTORS%REACTOME DATABASE ID RELEASE 57%196849		83	-0.201644	-0.797066	0.890244	0.923643	1	3449	tags=31%, list=22%, signal=40%
CONDENSATION OF PROPHASE CHROMOSOMES%REACTOME DATABASE ID RELEASE 57%2299718	CONDENSATION OF PROPHASE CHROMOSOMES%REACTOME DATABASE ID RELEASE 57%2299718		18	-0.279142	-0.796761	0.760204	0.922719	1	998	tags=11%, list=6%, signal=12%
HEDGEHOG%IOB%HEDGEHOG	HEDGEHOG%IOB%HEDGEHOG		36	-0.236454	-0.792581	0.815857	0.928062	1	3131	tags=31%, list=20%, signal=38%
BIOCARTA_HDAC_PATHWAY%MSIGDB_C2%BIOCARTA_HDAC_PATHWAY	BIOCARTA_HDAC_PATHWAY%MSIGDB_C2%BIOCARTA_HDAC_PATHWAY		24	-0.256405	-0.790502	0.780303	0.929857	1	3915	tags=38%, list=24%, signal=50%
BIOCARTA_PML_PATHWAY%MSIGDB_C2%BIOCARTA_PML_PATHWAY	BIOCARTA_PML_PATHWAY%MSIGDB_C2%BIOCARTA_PML_PATHWAY		15	-0.282407	-0.790423	0.75063	0.928577	1	2255	tags=27%, list=14%, signal=31%
GAP JUNCTION TRAFFICKING AND REGULATION%REACTOME%R-HSA-157858.1	GAP JUNCTION TRAFFICKING AND REGULATION%REACTOME%R-HSA-157858.1		26	-0.251692	-0.790119	0.797333	0.927691	1	1428	tags=8%, list=9%, signal=8%
INTERACTIONS OF REV WITH HOST CELLULAR PROTEINS%REACTOME%R-HSA-177243.1	INTERACTIONS OF REV WITH HOST CELLULAR PROTEINS%REACTOME%R-HSA-177243.1		25	-0.250066	-0.78504	0.797403	0.934199	1	1917	tags=12%, list=12%, signal=14%
DISEASES ASSOCIATED WITH THE TLR SIGNALING CASCADE%REACTOME DATABASE ID RELEASE 57%5602358	DISEASES ASSOCIATED WITH THE TLR SIGNALING CASCADE%REACTOME DATABASE ID RELEASE 57%5602358		23	-0.258888	-0.782636	0.814136	0.936455	1	2198	tags=26%, list=14%, signal=30%
DISEASES OF IMMUNE SYSTEM%REACTOME%R-HSA-5260271.1	DISEASES OF IMMUNE SYSTEM%REACTOME%R-HSA-5260271.1		23	-0.258888	-0.781321	0.794555	0.936971	1	2198	tags=26%, list=14%, signal=30%
IL3-MEDIATED SIGNALING EVENTS%PATHWAY INTERACTION DATABASE NCI-NATURE CURATED DATA%IL3-MEDIATED SIGNALING EVENTS	IL3-MEDIATED SIGNALING EVENTS%PATHWAY INTERACTION DATABASE NCI-NATURE CURATED DATA%IL3-MEDIATED SIGNALING EVENTS		22	-0.260494	-0.779652	0.798053	0.937994	1	3499	tags=32%, list=22%, signal=41%
HALLMARK_TGF_BETA_SIGNALING%MSIGDB_C2%HALLMARK_TGF_BETA_SIGNALING	HALLMARK_TGF_BETA_SIGNALING%MSIGDB_C2%HALLMARK_TGF_BETA_SIGNALING		50	-0.21636	-0.778635	0.873529	0.938086	1	729	tags=6%, list=5%, signal=6%
BILE ACID AND BILE SALT METABOLISM%REACTOME DATABASE ID RELEASE 57%194068	BILE ACID AND BILE SALT METABOLISM%REACTOME DATABASE ID RELEASE 57%194068		26	-0.247269	-0.773042	0.83715	0.944742	1	987	tags=12%, list=6%, signal=12%
CD28 CO-STIMULATION%REACTOME DATABASE ID RELEASE 57%389356	CD28 CO-STIMULATION%REACTOME DATABASE ID RELEASE 57%389356		28	-0.243532	-0.770126	0.824427	0.947546	1	2732	tags=21%, list=17%, signal=26%
RETINOIC ACID RECEPTORS-MEDIATED SIGNALING%PATHWAY INTERACTION DATABASE NCI-NATURE CURATED DATA%RETINOIC ACID RECEPTORS-MEDIATED SIGNALING	RETINOIC ACID RECEPTORS-MEDIATED SIGNALING%PATHWAY INTERACTION DATABASE NCI-NATURE CURATED DATA%RETINOIC ACID RECEPTORS-MEDIATED SIGNALING		29	-0.239283	-0.768987	0.861461	0.94771	1	2732	tags=28%, list=17%, signal=33%
BIOCARTA_FMLP_PATHWAY%MSIGDB_C2%BIOCARTA_FMLP_PATHWAY	BIOCARTA_FMLP_PATHWAY%MSIGDB_C2%BIOCARTA_FMLP_PATHWAY		29	-0.24326	-0.766604	0.847594	0.94958	1	2346	tags=21%, list=15%, signal=24%
REGULATION OF GLUCOKINASE BY GLUCOKINASE REGULATORY PROTEIN%REACTOME DATABASE ID RELEASE 57%170822	REGULATION OF GLUCOKINASE BY GLUCOKINASE REGULATORY PROTEIN%REACTOME DATABASE ID RELEASE 57%170822		23	-0.248441	-0.765359	0.84375	0.949886	1	1917	tags=13%, list=12%, signal=15%
REV-MEDIATED NUCLEAR EXPORT OF HIV RNA%REACTOME DATABASE ID RELEASE 57%165054	REV-MEDIATED NUCLEAR EXPORT OF HIV RNA%REACTOME DATABASE ID RELEASE 57%165054		24	-0.251427	-0.76359	0.825792	0.950773	1	1917	tags=13%, list=12%, signal=14%
RHO GTPASES ACTIVATE CIT%REACTOME DATABASE ID RELEASE 57%5625900	RHO GTPASES ACTIVATE CIT%REACTOME DATABASE ID RELEASE 57%5625900		15	-0.270456	-0.75984	0.778607	0.954346	1	2865	tags=27%, list=18%, signal=32%
BIOCARTA_CK1_PATHWAY%MSIGDB_C2%BIOCARTA_CK1_PATHWAY	BIOCARTA_CK1_PATHWAY%MSIGDB_C2%BIOCARTA_CK1_PATHWAY		16	-0.276945	-0.759711	0.807229	0.95309	1	3054	tags=31%, list=19%, signal=39%
PID_RETINOIC_ACID_PATHWAY%MSIGDB_C2%PID_RETINOIC_ACID_PATHWAY	PID_RETINOIC_ACID_PATHWAY%MSIGDB_C2%PID_RETINOIC_ACID_PATHWAY		29	-0.239283	-0.756085	0.866848	0.956196	1	2732	tags=28%, list=17%, signal=33%
SIGNALING BY RETINOIC ACID%REACTOME DATABASE ID RELEASE 57%5362517	SIGNALING BY RETINOIC ACID%REACTOME DATABASE ID RELEASE 57%5362517		36	-0.221499	-0.752862	0.911681	0.958724	1	3595	tags=31%, list=22%, signal=39%
T CELL ACTIVATION%PANTHER PATHWAY%P00053	T CELL ACTIVATION%PANTHER PATHWAY%P00053		56	-0.207981	-0.747991	0.930435	0.963224	1	3645	tags=30%, list=23%, signal=39%
PHASE 4 - RESTING MEMBRANE POTENTIAL%REACTOME%R-HSA-5576886.1	PHASE 4 - RESTING MEMBRANE POTENTIAL%REACTOME%R-HSA-5576886.1		17	-0.263402	-0.745404	0.809302	0.964916	1	111	tags=6%, list=1%, signal=6%
HDR THROUGH SINGLE STRAND ANNEALING (SSA)%REACTOME DATABASE ID RELEASE 57%5685938	HDR THROUGH SINGLE STRAND ANNEALING (SSA)%REACTOME DATABASE ID RELEASE 57%5685938		32	-0.229571	-0.744832	0.87766	0.964151	1	3611	tags=28%, list=23%, signal=36%
ST_ERK1_ERK2_MAPK_PATHWAY%MSIGDB_C2%ST_ERK1_ERK2_MAPK_PATHWAY	ST_ERK1_ERK2_MAPK_PATHWAY%MSIGDB_C2%ST_ERK1_ERK2_MAPK_PATHWAY		29	-0.234682	-0.742076	0.888594	0.966034	1	4578	tags=38%, list=29%, signal=53%
PLATELET AGGREGATION (PLUG FORMATION)%REACTOME%R-HSA-76009.1	PLATELET AGGREGATION (PLUG FORMATION)%REACTOME%R-HSA-76009.1		34	-0.223731	-0.739794	0.914286	0.96709	1	2732	tags=21%, list=17%, signal=25%
GLUCOSE TRANSPORT%REACTOME%R-HSA-70153.1	GLUCOSE TRANSPORT%REACTOME%R-HSA-70153.1		34	-0.219342	-0.739341	0.879032	0.966191	1	2654	tags=15%, list=17%, signal=18%
CANONICAL NF-KAPPAB PATHWAY%PATHWAY INTERACTION DATABASE NCI-NATURE CURATED DATA%CANONICAL NF-KAPPAB PATHWAY	CANONICAL NF-KAPPAB PATHWAY%PATHWAY INTERACTION DATABASE NCI-NATURE CURATED DATA%CANONICAL NF-KAPPAB PATHWAY		22	-0.242863	-0.735972	0.869792	0.968536	1	2582	tags=23%, list=16%, signal=27%
POST-TRANSLATIONAL MODIFICATION: SYNTHESIS OF GPI-ANCHORED PROTEINS%REACTOME DATABASE ID RELEASE 57%163125	POST-TRANSLATIONAL MODIFICATION: SYNTHESIS OF GPI-ANCHORED PROTEINS%REACTOME DATABASE ID RELEASE 57%163125		22	-0.247451	-0.735606	0.851936	0.967536	1	3460	tags=32%, list=22%, signal=41%
P73 TRANSCRIPTION FACTOR NETWORK%PATHWAY INTERACTION DATABASE NCI-NATURE CURATED DATA%P73 TRANSCRIPTION FACTOR NETWORK	P73 TRANSCRIPTION FACTOR NETWORK%PATHWAY INTERACTION DATABASE NCI-NATURE CURATED DATA%P73 TRANSCRIPTION FACTOR NETWORK		69	-0.191907	-0.732951	0.957447	0.968953	1	2625	tags=16%, list=16%, signal=19%
ANTIGEN PRESENTATION: FOLDING, ASSEMBLY AND PEPTIDE LOADING OF CLASS I MHC%REACTOME DATABASE ID RELEASE 57%983170	ANTIGEN PRESENTATION: FOLDING, ASSEMBLY AND PEPTIDE LOADING OF CLASS I MHC%REACTOME DATABASE ID RELEASE 57%983170		16	-0.264292	-0.728907	0.843188	0.971707	1	2965	tags=31%, list=18%, signal=38%
ST_INTERLEUKIN_4_PATHWAY%MSIGDB_C2%ST_INTERLEUKIN_4_PATHWAY	ST_INTERLEUKIN_4_PATHWAY%MSIGDB_C2%ST_INTERLEUKIN_4_PATHWAY		22	-0.241465	-0.727917	0.887399	0.97134	1	4063	tags=36%, list=25%, signal=49%
PID_P73PATHWAY%MSIGDB_C2%PID_P73PATHWAY	PID_P73PATHWAY%MSIGDB_C2%PID_P73PATHWAY		69	-0.191907	-0.727297	0.959538	0.970556	1	2625	tags=16%, list=16%, signal=19%
PAR1-MEDIATED THROMBIN SIGNALING EVENTS%PATHWAY INTERACTION DATABASE NCI-NATURE CURATED DATA%PAR1-MEDIATED THROMBIN SIGNALING EVENTS	PAR1-MEDIATED THROMBIN SIGNALING EVENTS%PATHWAY INTERACTION DATABASE NCI-NATURE CURATED DATA%PAR1-MEDIATED THROMBIN SIGNALING EVENTS		42	-0.209541	-0.727192	0.916216	0.969248	1	938	tags=12%, list=6%, signal=13%
HOMOLOGOUS DNA PAIRING AND STRAND EXCHANGE%REACTOME DATABASE ID RELEASE 57%5693579	HOMOLOGOUS DNA PAIRING AND STRAND EXCHANGE%REACTOME DATABASE ID RELEASE 57%5693579		37	-0.213701	-0.725496	0.904762	0.969571	1	1891	tags=16%, list=12%, signal=18%
PID_THROMBIN_PAR1_PATHWAY%MSIGDB_C2%PID_THROMBIN_PAR1_PATHWAY	PID_THROMBIN_PAR1_PATHWAY%MSIGDB_C2%PID_THROMBIN_PAR1_PATHWAY		42	-0.209541	-0.72484	0.939891	0.968873	1	938	tags=12%, list=6%, signal=13%
PHASE 1 - INACTIVATION OF FAST NA+ CHANNELS%REACTOME DATABASE ID RELEASE 57%5576894	PHASE 1 - INACTIVATION OF FAST NA+ CHANNELS%REACTOME DATABASE ID RELEASE 57%5576894		25	-0.236435	-0.724436	0.896471	0.967872	1	357	tags=8%, list=2%, signal=8%
BIOCARTA_CTLA4_PATHWAY%MSIGDB_C2%BIOCARTA_CTLA4_PATHWAY	BIOCARTA_CTLA4_PATHWAY%MSIGDB_C2%BIOCARTA_CTLA4_PATHWAY		15	-0.27252	-0.724192	0.830467	0.966682	1	247	tags=7%, list=2%, signal=7%
SA_TRKA_RECEPTOR%MSIGDB_C2%SA_TRKA_RECEPTOR	SA_TRKA_RECEPTOR%MSIGDB_C2%SA_TRKA_RECEPTOR		15	-0.262958	-0.720564	0.864662	0.968726	1	3499	tags=27%, list=22%, signal=34%
TNFSF8%IOB%TNFSF8	TNFSF8%IOB%TNFSF8		19	-0.247527	-0.717263	0.863747	0.970479	1	2981	tags=32%, list=19%, signal=39%
CXCR3-MEDIATED SIGNALING EVENTS%PATHWAY INTERACTION DATABASE NCI-NATURE CURATED DATA%CXCR3-MEDIATED SIGNALING EVENTS	CXCR3-MEDIATED SIGNALING EVENTS%PATHWAY INTERACTION DATABASE NCI-NATURE CURATED DATA%CXCR3-MEDIATED SIGNALING EVENTS		35	-0.216248	-0.714574	0.912929	0.9717	1	2732	tags=23%, list=17%, signal=27%
BIOCARTA_PTEN_PATHWAY%MSIGDB_C2%BIOCARTA_PTEN_PATHWAY	BIOCARTA_PTEN_PATHWAY%MSIGDB_C2%BIOCARTA_PTEN_PATHWAY		18	-0.24944	-0.700574	0.875312	0.982306	1	3502	tags=33%, list=22%, signal=43%
BIOCARTA_SPPA_PATHWAY%MSIGDB_C2%BIOCARTA_SPPA_PATHWAY	BIOCARTA_SPPA_PATHWAY%MSIGDB_C2%BIOCARTA_SPPA_PATHWAY		22	-0.230516	-0.700397	0.903394	0.981048	1	1467	tags=14%, list=9%, signal=15%
BIOCARTA_TFF_PATHWAY%MSIGDB_C2%BIOCARTA_TFF_PATHWAY	BIOCARTA_TFF_PATHWAY%MSIGDB_C2%BIOCARTA_TFF_PATHWAY		18	-0.248086	-0.697485	0.872236	0.981982	1	3499	tags=33%, list=22%, signal=43%
PRE-NOTCH PROCESSING IN GOLGI%REACTOME%R-HSA-1912420.2	PRE-NOTCH PROCESSING IN GOLGI%REACTOME%R-HSA-1912420.2		15	-0.257925	-0.695292	0.87619	0.982253	1	1375	tags=13%, list=9%, signal=15%
5-HYDROXYTRYPTAMINE DEGREDATION%PANTHER PATHWAY%P04372	5-HYDROXYTRYPTAMINE DEGREDATION%PANTHER PATHWAY%P04372		15	-0.252958	-0.695032	0.874408	0.981057	1	3043	tags=40%, list=19%, signal=49%
SYNDECAN-3-MEDIATED SIGNALING EVENTS%PATHWAY INTERACTION DATABASE NCI-NATURE CURATED DATA%SYNDECAN-3-MEDIATED SIGNALING EVENTS	SYNDECAN-3-MEDIATED SIGNALING EVENTS%PATHWAY INTERACTION DATABASE NCI-NATURE CURATED DATA%SYNDECAN-3-MEDIATED SIGNALING EVENTS		17	-0.249571	-0.692827	0.897912	0.981267	1	3926	tags=53%, list=24%, signal=70%
NUCLEAR PORE COMPLEX (NPC) DISASSEMBLY%REACTOME%R-HSA-3301854.2	NUCLEAR PORE COMPLEX (NPC) DISASSEMBLY%REACTOME%R-HSA-3301854.2		26	-0.220947	-0.691995	0.908847	0.98048	1	1917	tags=12%, list=12%, signal=13%
PHASE 2 - PLATEAU PHASE%REACTOME DATABASE ID RELEASE 57%5576893	PHASE 2 - PLATEAU PHASE%REACTOME DATABASE ID RELEASE 57%5576893		25	-0.228541	-0.691794	0.909794	0.979243	1	380	tags=8%, list=2%, signal=8%
PID_NFKAPPAB_CANONICAL_PATHWAY%MSIGDB_C2%PID_NFKAPPAB_CANONICAL_PATHWAY	PID_NFKAPPAB_CANONICAL_PATHWAY%MSIGDB_C2%PID_NFKAPPAB_CANONICAL_PATHWAY		22	-0.229759	-0.684118	0.920988	0.983269	1	2582	tags=23%, list=16%, signal=27%
FERTILIZATION%REACTOME DATABASE ID RELEASE 57%1187000	FERTILIZATION%REACTOME DATABASE ID RELEASE 57%1187000		20	-0.234041	-0.682375	0.928395	0.98303	1	4099	tags=30%, list=26%, signal=40%
TRIACYLGLYCEROL BIOSYNTHESIS%HUMANCYC%TRIGLSYN-PWY	TRIACYLGLYCEROL BIOSYNTHESIS%HUMANCYC%TRIGLSYN-PWY		16	-0.25229	-0.678378	0.921519	0.984322	1	1892	tags=19%, list=12%, signal=21%
INTRA-GOLGI TRAFFIC%REACTOME DATABASE ID RELEASE 57%6811438	INTRA-GOLGI TRAFFIC%REACTOME DATABASE ID RELEASE 57%6811438		37	-0.200247	-0.676413	0.966321	0.984223	1	1787	tags=14%, list=11%, signal=15%
REPRODUCTION%REACTOME%R-HSA-1474165.1	REPRODUCTION%REACTOME%R-HSA-1474165.1		20	-0.234041	-0.676141	0.920103	0.982988	1	4099	tags=30%, list=26%, signal=40%
BIOCARTA_ACH_PATHWAY%MSIGDB_C2%BIOCARTA_ACH_PATHWAY	BIOCARTA_ACH_PATHWAY%MSIGDB_C2%BIOCARTA_ACH_PATHWAY		16	-0.250618	-0.675137	0.907801	0.982251	1	727	tags=13%, list=5%, signal=13%
PYRUVATE METABOLISM%REACTOME%R-HSA-70268.5	PYRUVATE METABOLISM%REACTOME%R-HSA-70268.5		25	-0.214615	-0.672586	0.932468	0.982487	1	3502	tags=32%, list=22%, signal=41%
BIOCARTA_IGF1R_PATHWAY%MSIGDB_C2%BIOCARTA_IGF1R_PATHWAY	BIOCARTA_IGF1R_PATHWAY%MSIGDB_C2%BIOCARTA_IGF1R_PATHWAY		22	-0.225259	-0.663723	0.931398	0.986287	1	2732	tags=23%, list=17%, signal=27%
SIGNALING BY HIPPO%REACTOME%R-HSA-2028269.1	SIGNALING BY HIPPO%REACTOME%R-HSA-2028269.1		18	-0.222409	-0.658112	0.933014	0.987865	1	2961	tags=22%, list=18%, signal=27%
HALLMARK_PANCREAS_BETA_CELLS%MSIGDB_C2%HALLMARK_PANCREAS_BETA_CELLS	HALLMARK_PANCREAS_BETA_CELLS%MSIGDB_C2%HALLMARK_PANCREAS_BETA_CELLS		39	-0.191652	-0.658076	0.978261	0.986508	1	991	tags=8%, list=6%, signal=8%
PID_HDAC_CLASSIII_PATHWAY%MSIGDB_C2%PID_HDAC_CLASSIII_PATHWAY	PID_HDAC_CLASSIII_PATHWAY%MSIGDB_C2%PID_HDAC_CLASSIII_PATHWAY		25	-0.211177	-0.655519	0.939547	0.986497	1	2645	tags=20%, list=16%, signal=24%
SIGNALING EVENTS MEDIATED BY HDAC CLASS III%PATHWAY INTERACTION DATABASE NCI-NATURE CURATED DATA%SIGNALING EVENTS MEDIATED BY HDAC CLASS III	SIGNALING EVENTS MEDIATED BY HDAC CLASS III%PATHWAY INTERACTION DATABASE NCI-NATURE CURATED DATA%SIGNALING EVENTS MEDIATED BY HDAC CLASS III		25	-0.211177	-0.651588	0.938424	0.98712	1	2645	tags=20%, list=16%, signal=24%
ST_B_CELL_ANTIGEN_RECEPTOR%MSIGDB_C2%ST_B_CELL_ANTIGEN_RECEPTOR	ST_B_CELL_ANTIGEN_RECEPTOR%MSIGDB_C2%ST_B_CELL_ANTIGEN_RECEPTOR		37	-0.190188	-0.651521	0.953608	0.98578	1	2732	tags=19%, list=17%, signal=23%
BIOCARTA_CCR3_PATHWAY%MSIGDB_C2%BIOCARTA_CCR3_PATHWAY	BIOCARTA_CCR3_PATHWAY%MSIGDB_C2%BIOCARTA_CCR3_PATHWAY		19	-0.227024	-0.648691	0.930288	0.985833	1	1467	tags=16%, list=9%, signal=17%
SIG_BCR_SIGNALING_PATHWAY%MSIGDB_C2%SIG_BCR_SIGNALING_PATHWAY	SIG_BCR_SIGNALING_PATHWAY%MSIGDB_C2%SIG_BCR_SIGNALING_PATHWAY		45	-0.180727	-0.646765	0.983051	0.985386	1	3645	tags=27%, list=23%, signal=34%
HEXOSE UPTAKE%REACTOME DATABASE ID RELEASE 57%189200	HEXOSE UPTAKE%REACTOME DATABASE ID RELEASE 57%189200		40	-0.186271	-0.64202	0.975676	0.986182	1	2654	tags=13%, list=17%, signal=15%
PID_CD40_PATHWAY%MSIGDB_C2%PID_CD40_PATHWAY	PID_CD40_PATHWAY%MSIGDB_C2%PID_CD40_PATHWAY		30	-0.196699	-0.638603	0.956873	0.986296	1	2981	tags=23%, list=19%, signal=29%
COSTIMULATION BY THE CD28 FAMILY%REACTOME%R-HSA-388841.2	COSTIMULATION BY THE CD28 FAMILY%REACTOME%R-HSA-388841.2		50	-0.174566	-0.635792	0.985955	0.986127	1	2732	tags=16%, list=17%, signal=19%
SIG_CHEMOTAXIS%MSIGDB_C2%SIG_CHEMOTAXIS	SIG_CHEMOTAXIS%MSIGDB_C2%SIG_CHEMOTAXIS		42	-0.180605	-0.635088	0.978947	0.98507	1	4450	tags=31%, list=28%, signal=43%
ST_T_CELL_SIGNAL_TRANSDUCTION%MSIGDB_C2%ST_T_CELL_SIGNAL_TRANSDUCTION	ST_T_CELL_SIGNAL_TRANSDUCTION%MSIGDB_C2%ST_T_CELL_SIGNAL_TRANSDUCTION		43	-0.180269	-0.629371	0.986595	0.985925	1	1941	tags=14%, list=12%, signal=16%
PID_ATM_PATHWAY%MSIGDB_C2%PID_ATM_PATHWAY	PID_ATM_PATHWAY%MSIGDB_C2%PID_ATM_PATHWAY		33	-0.180776	-0.617978	0.983099	0.988694	1	1365	tags=9%, list=9%, signal=10%
FACTORS INVOLVED IN MEGAKARYOCYTE DEVELOPMENT AND PLATELET PRODUCTION%REACTOME%R-HSA-983231.2	FACTORS INVOLVED IN MEGAKARYOCYTE DEVELOPMENT AND PLATELET PRODUCTION%REACTOME%R-HSA-983231.2		113	-0.145537	-0.603313	1	0.991967	1	4451	tags=31%, list=28%, signal=43%
ACYL CHAIN REMODELLING OF PI%REACTOME%R-HSA-1482922.2	ACYL CHAIN REMODELLING OF PI%REACTOME%R-HSA-1482922.2		16	-0.22167	-0.601144	0.951338	0.991236	1	3880	tags=31%, list=24%, signal=41%
PRESYNAPTIC PHASE OF HOMOLOGOUS DNA PAIRING AND STRAND EXCHANGE%REACTOME DATABASE ID RELEASE 57%5693616	PRESYNAPTIC PHASE OF HOMOLOGOUS DNA PAIRING AND STRAND EXCHANGE%REACTOME DATABASE ID RELEASE 57%5693616		34	-0.184423	-0.600126	0.97561	0.990145	1	1891	tags=15%, list=12%, signal=17%
ATM PATHWAY%PATHWAY INTERACTION DATABASE NCI-NATURE CURATED DATA%ATM PATHWAY	ATM PATHWAY%PATHWAY INTERACTION DATABASE NCI-NATURE CURATED DATA%ATM PATHWAY		33	-0.180776	-0.599615	0.990099	0.988949	1	1365	tags=9%, list=9%, signal=10%
BIOCARTA_ACTINY_PATHWAY%MSIGDB_C2%BIOCARTA_ACTINY_PATHWAY	BIOCARTA_ACTINY_PATHWAY%MSIGDB_C2%BIOCARTA_ACTINY_PATHWAY		19	-0.194985	-0.560882	0.982716	0.995952	1	1884	tags=16%, list=12%, signal=18%
PLATELET SENSITIZATION BY LDL%REACTOME DATABASE ID RELEASE 57%432142	PLATELET SENSITIZATION BY LDL%REACTOME DATABASE ID RELEASE 57%432142		16	-0.199142	-0.548001	0.967419	0.99645	1	517	tags=6%, list=3%, signal=6%
PID_SMAD2_3PATHWAY%MSIGDB_C2%PID_SMAD2_3PATHWAY	PID_SMAD2_3PATHWAY%MSIGDB_C2%PID_SMAD2_3PATHWAY		15	-0.200949	-0.543435	0.97343	0.995707	1	12816	tags=100%, list=80%, signal=498%
SIG_REGULATION_OF_THE_ACTIN_CYTOSKELETON_BY_RHO_GTPASES%MSIGDB_C2%SIG_REGULATION_OF_THE_ACTIN_CYTOSKELETON_BY_RHO_GTPASES	SIG_REGULATION_OF_THE_ACTIN_CYTOSKELETON_BY_RHO_GTPASES%MSIGDB_C2%SIG_REGULATION_OF_THE_ACTIN_CYTOSKELETON_BY_RHO_GTPASES		32	-0.166114	-0.534848	0.99458	0.9953	1	4756	tags=41%, list=30%, signal=58%
VEGFR2 MEDIATED VASCULAR PERMEABILITY%REACTOME%R-HSA-5218920.1	VEGFR2 MEDIATED VASCULAR PERMEABILITY%REACTOME%R-HSA-5218920.1		24	-0.161503	-0.498205	0.994429	0.997057	1	2732	tags=17%, list=17%, signal=20%
