# Supplementary material for: Analogous mechanism regulating formation of neocortical basal radial glia and cerebellar Bergmann glia
Source: eLife. 2017 May 10;6:e23253. doi: 10.7554/eLife.23253 (PMC5457141; doi:10.7554/eLife.23253)
Supplement: Supplementary file 5. — (A) Lists of primary and secondary antibodies used in the current study (first spreadsheet). (B, C) Lists of primers used for RT-qPCR (second spreadsheet) and in situ hybridization (third spreadsheet). Gene name, primer names, primer sequence, and references to previously published work (if any) are listed in the first, second, third and fourth column, respectively. DOI: http://dx.doi.org/10.7554/eLife.23253.028 [file elife-23253-supp5.xlsx]

## Sheet: 1st antibodies
Table S7. Antibodies used in the study
Primary antibody	Species raised	Supplier	Cat. No	Dilution
activated caspase 3	Rabbit	Abcam	9661S	1:500
BLBP	Rabbit	Millipore	ABN14	1:1000
BLBP	Guinea pig	Frontier Institute co.,ltd	BLBP-GP-Af291	1:500
BrdU	Mouse	BD Biosciences	347580	1:150
Citp2	Rat	abcam	ab18465	1:1000
GFAP	Chicken	abcam	ab4674	1:1000
GFP	Rabbit	Invitrogen	A11122	1:1000
GFP	Rat	Nacalai Tesque	04404-84	1:2000
GFP	Chicken	abcam	ab13970	1:3000
Hopx	Rabbit	Santa Cruz Biotech, Inc.	sc-30216	1:200
Ki67	Rabbit	abcam	ab15580	1:250
Olig2	Rabbit	abcam	ab109186	1:500
Pax6	Rabbit	Covance	PRB-278P	1:200
Pax6	Mouse	DSHB	Pax6	1:300
phosphorylated ERK	Rabbit	Cell Signaling	4370	1:2000
phosphorylated histone 3	Rabbit	Millipore	06-570	1:1000
phosphorylated vimentin	Mouse	MBL	D076-3	1:2000
Sabt2	Rabbit	abcam	ab34735	1:1000
Sox10	Goat	R&D Systems, Inc.	AF2864-SP
Sox2	Goat	R&D Systems, Inc.	AF2018	1:250
Sox9	Rabbit	Millipore	AB5535	1:1000
Tbr1	Rabbit	abcam	ab31940	1:2000
Tbr2	Rabbit	abcam	ab23345	1:1000
Tubb3	Mouse	Covance	MMS-435P	1:2000
Secondary antibody	Species raised	Supplier	Fluorochrome	Dilution
anti-rabbit	Donkey	ThermoFisher	Alexa 488, 594 or 647	1:500
anti-mouse	Donkey	ThermoFisher	Alexa 488, 568 or 647	1:500
anti-goat	Donkey	ThermoFisher	Alexa 594 or 647	1:500
anti-goat	Donkey	Jackson ImmunoResearch	Alexa 488	1:500
anti-rat	Goat	Invitrogen	Alexa 568	1:500
anti-rat	Donkey	Jackson ImmunoResearch	Cy2	1:200
anti-chcken	Donkey	Jackson ImmunoResearch	Alexa 488 or 594	1:500
anti guinea pig	Donkey	Jackson ImmunoResearch	Alexa 488, 568 or 647	1:500

## Sheet: RT-qPCR primers
Gene	Sequence_forward	Sequence_reverse	Size (bp)	PrimerBank ID
Aurkb	CAGAAGGAGAACGCCTACCC	GAGAGCAAGCGCAGATGTC	117	13096928a1
Birc5	GAGGCTGGCTTCATCCACTG	ATGCTCCTCTATCGGGTTGTC	114	59859886c1
Dlk1	AGTGCGAAACCTGGGTGTC	GCCTCCTTGTTGAAAGTGGTCA	148	12838136a1
Dtx2	TTGCAGGCATGACGAGTGT	TGTGACTTTTAGAGGCCGGAC	108	12963809a1
Dtx4	TGTGCCTGTGAAAAACTTGAATG	TGGGATGGACTTTATCTCACTCT	166	27369595a1
E2f1	TGCAGAAACGGCGCATCTAT	CCGCTTACCAATCCCCACC	122	33859592a1
Fabp7	GGACACAATGCACATTCAAGAAC	CCGAACCACAGACTTACAGTTT	101	10946572a1
Gapdh	AGGTCGGTGTGAACGGATTTG	TGTAGACCATGTAGTTGAGGTCA	123	6679937a1
Hey1	GCGCGGACGAGAATGGAAA	TCAGGTGATCCACAGTCATCTG	231	6754188a1
Hey2	AAGCGCCCTTGTGAGGAAAC	GGTAGTTGTCGGTGAATTGGAC	126	7305159a1
Jag1	CCTCGGGTCAGTTTGAGCTG	CCTTGAGGCACACTTTGAAGTA	150	7305197a1
Met	GTGAACATGAAGTATCAGCTCCC	TGTAGTTTGTGGCTCCGAGAT	100	6678868a1
Notch2	ATGTGGACGAGTGTCTGTTGC	GGAAGCATAGGCACAGTCATC	146	33859592a1
Spred1	GAAGACACTTCCCGTTCCCTA	GCCTTGCTGACTGAATGGTAT	171	51036620c3
Spred2-1	GTCAAGGCTGTGGTTATGACC	GGTGCATGACCTTACACACG	100	146149276c1
Spred2-2	GAAGAAACACACCCGGACGAT	CTCCTTCCTGTGGGAACCAT	100	15743556a1
Spred3	GTGATGGCCCGAGATGACTC	CCGTGGATGACGTAGTGCC	134	33620728a1
Spry4	CCCGCTGTGACCAGGATATTA	GCCATGTGATCTAGGAGCCTC	112	31543766c2
Syk	CTACCTGCTACGCCAGAGC	GCCATTAAGTTCCCTCTCGATG	103	6755706a1
Tle2-1	AGCCCTTTCACCTCATCCTTC	GCGTCCATACACGACAGAGC	126	356991205c3
Tle2-2	TGGCTGCCGTAAAGGAAGAC	CTCACTGTCATAAGGCCCTGA	191	356991205c3

## Sheet: Ribroprobes
Gene	Sequence_forward	Sequence_reverse	Size (bp)	Reference
Aldh1l1	TGGAAAGTCACCCCTTATCA	TAATACGACTCACTATAGGGTCCAGACTGCTTGAATCCTC	613
Ass1	CAAAGCAACACGGAATCCCC	TAATACGACTCACTATAGGGCTTGCTCTGAAGGCGATGGT	734
Cnpy1	ACCTGCCGTGGACATTCTTTA	TAATACGACTCACTATAGGGCAGTCCTGGGCTTCATCTTGT	949
Cyp26b	TGTTGTTCTCTGGCCTCTTC	TAATACGACTCACTATAGGGAGTACACCTGGCAGAGATGC	880
Dll1	TCAATGGAGGACGATGTTCA	TAATACGACTCACTATAGGGTAAGTGTTGGGGCGATCTTC
Etv4	TGAAAGGCGGATACTTGGAC	TAATACGACTCACTATAGGGGGAATGGTCGAAGGGATTTT	912
Etv4	CCACCAGGATCAAGAAGGAA	TAATACGACTCACTATAGGGAAGTCTGTGCGCTCCTGTTT	529
Etv5	GACACAGATCTGGCTCACGA	TAATACGACTCACTATAGGGAAAGTACAGCCTGGGGTCCT	900
Etv5	AGGACCCCAGGCTGTACTTT	TAATACGACTCACTATAGGGTCCATGTCCAGGAGGTAAGC	505
Fabp7	GTAGATGCTTTCTGCGCAAC	TAATACGACTCACTATAGGGCATAACAGCGAACAGCAACG	385
Hes1	ACACCGGACAAACCAAAGAC	TAATACGACTCACTATAGGGTCCCACTGTTGCTGGTGTAG	697
Mib1	GGGATGACATTCTGGCAGTT	TAATACGACTCACTATAGGGTCCTGGACTGAACCTGCTCT	858
Ptprz1	CTCCGGGATCTCCACGGTCC	TAATACGACTCACTATAGGGGCCTGGGCAGCCTTTCTCAC	994
Shc3	CGCACTCCTGACTCCAAACA	TAATACGACTCACTATAGGGAGGTGGCTGATGCTGTCAAA	989
Slc1a3	CTCACGGTCACTGCTGTCAT	TAATACGACTCACTATAGGGGTCACGGTGTACATGGCAAG	803
Sostdc1	AGTAGCACTGGACTGGATCG	TAATACGACTCACTATAGGGCACGCTAATGATGATGGTGA	1253
Timp4	CCCAATGAGTGTCTCTGGAC	TAATACGACTCACTATAGGGGACTTGCAGGACAAGAGGAA	732
Tnc	CCATGAAGGGATTCGAAGAA	TAATACGACTCACTATAGGGCTTCTCTGCGGTCTCCAAAC	816
Metrn
